# Supplementary material for: Probing the Immunoreceptor Tyrosine-Based Inhibition Motif Interaction Protein Partners with Proteomics
Source: MDPI journal article supplement (doi:10.3390/molecules29091977), 2024-04-25
Supplement: s1 [file s1]

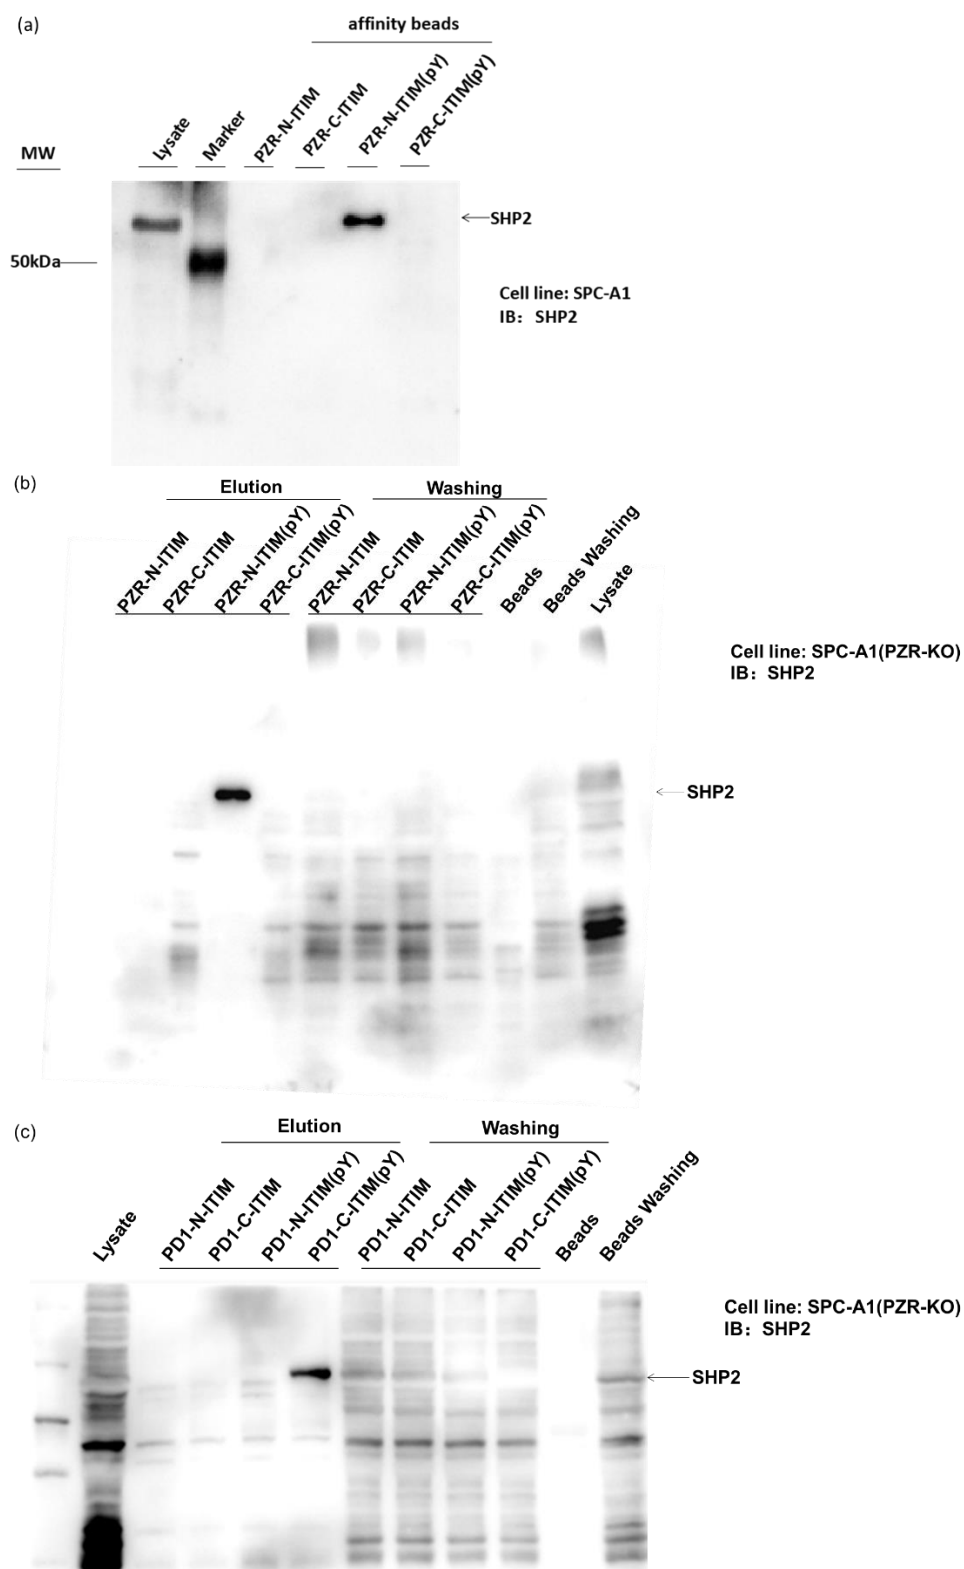

**Figure S4.** Uncropped Western blot analysis with SHP2 antibody (1:5000), detected by ECL system. Cell line: SPC-A1. (a) Affinity beads with different peptide pull-down SHP2. (b) PZR-N-ITIM (pY) pulled down SHP2. (c) PD1-C-ITSM(pY) pulled down SHP2.
