# Supplementary material for: Probing the Immunoreceptor Tyrosine-Based Inhibition Motif Interaction Protein Partners with Proteomics
Source: MDPI journal article supplement (doi:10.3390/molecules29091977), 2024-04-25
Supplement: s1 [file s1]

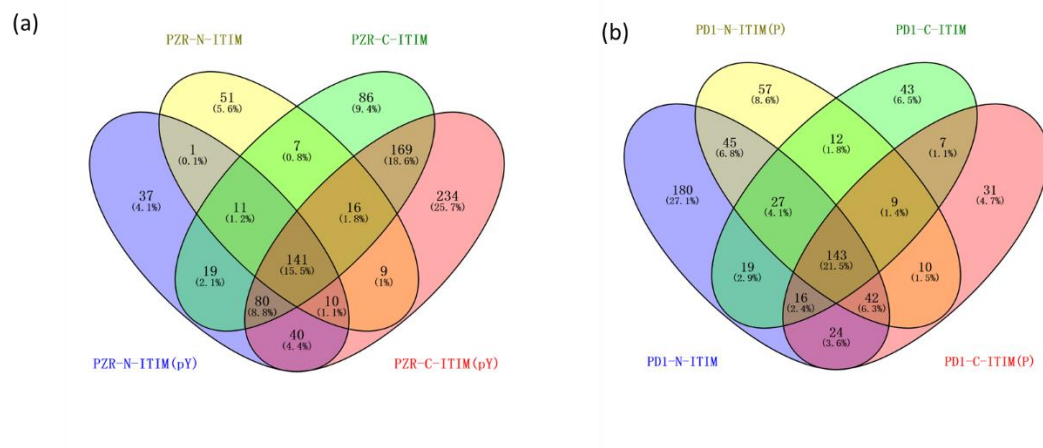

**Figure S1.** Results of ITIM-agarose beads affinity pull-down from SPC-A1(PZR KO) cell line.

Overlap of proteins from each affinity pull-down experiments. (a) The Venn diagram of the proteins pulled down by PZR-ITIM agarose beads, with the number of proteins and their proportion labeled within the diagram. (b) The Venn diagram of the proteins pulled down by PD1-ITIM agarose beads, with the number of proteins and their proportion labeled within the diagram.

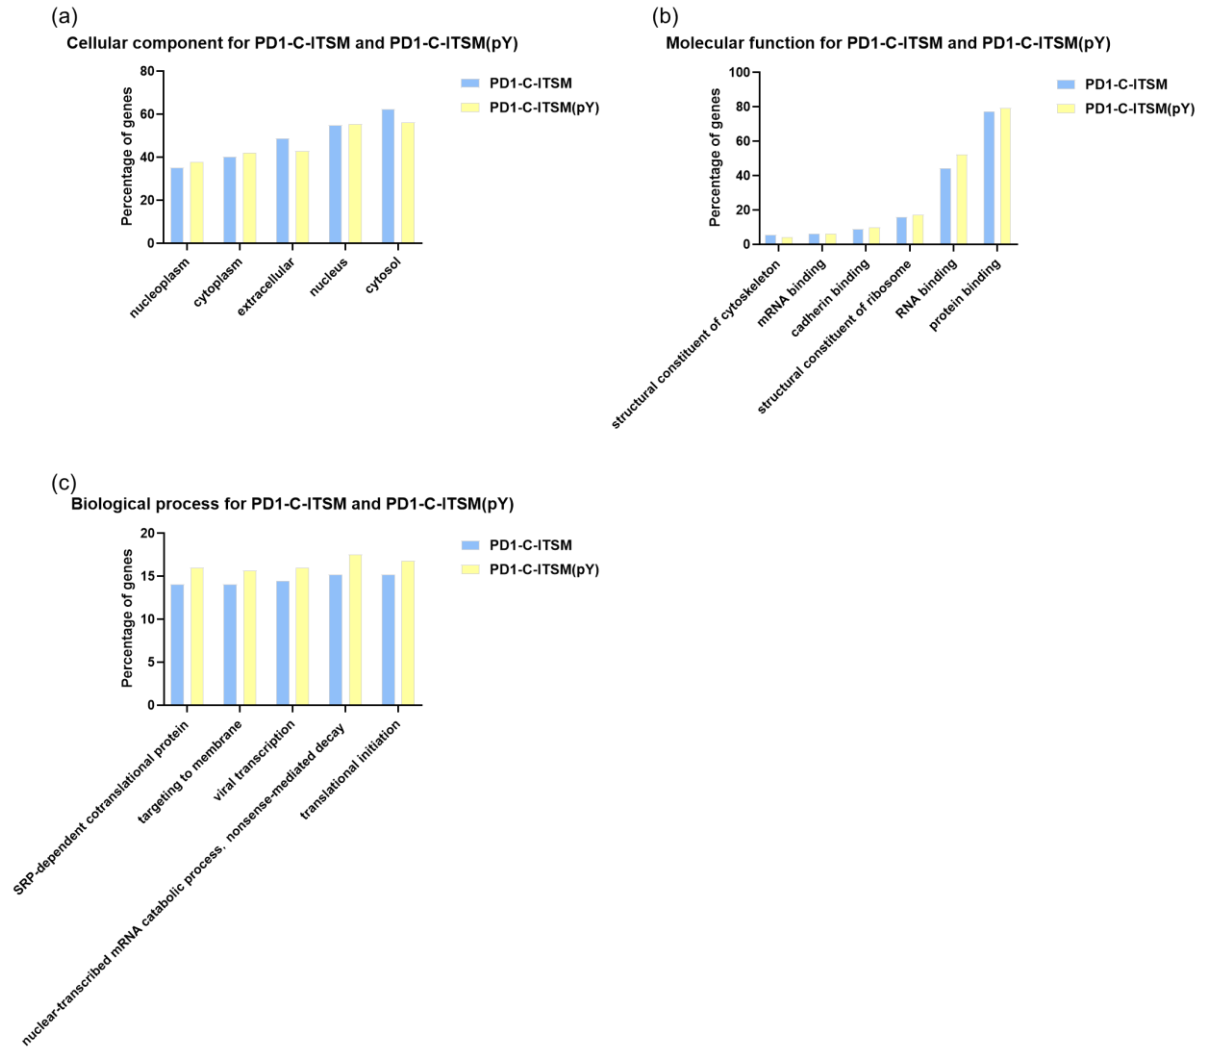

**Figure S2.** GO analysis of PD1-C-ITSM agarose beads and PZR-C-ITSM(pY) agarose beads affinity pull-down from SPC-A1(PZR KO) Cell Line. (a) Cellular component. (b) Molecular function. (c) Biological process.

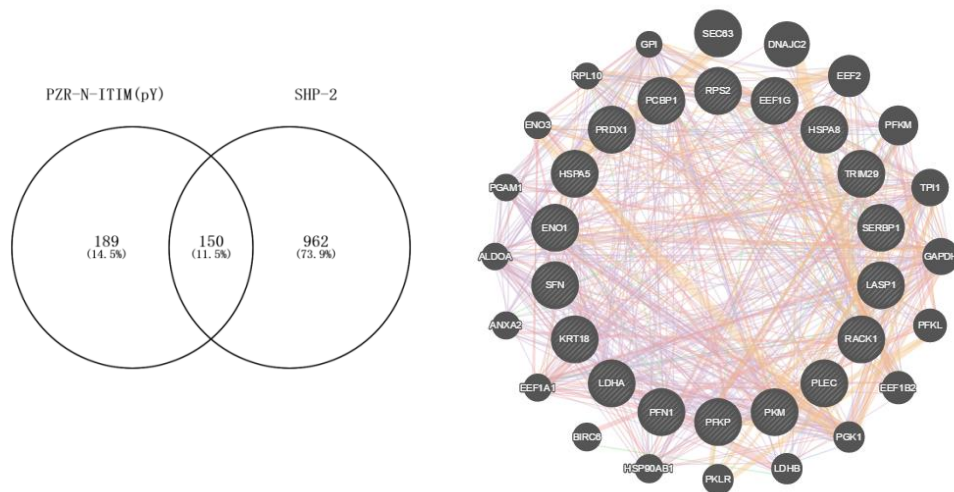

**Figure S3.** Comparison of PZR-N-ITIM(pY) and SHP2 proteins pulled down in the SPC-A1 cell line (a)The overlap of proteins from PZR-N-ITIM(pY) Affinity Pull-Down for MS and SHP2 IP for MS. (b)The networks of PZR-N-ITIM(pY) Affinity Pull-Down-MS and SHP2 IP for MS analysis.
