# Supplementary material for: Probing the Immunoreceptor Tyrosine-Based Inhibition Motif Interaction Protein Partners with Proteomics
Source: Molecules. 2024 Apr 25;29(9):1977. doi: 10.3390/molecules29091977 (PMC11085718; doi:10.3390/molecules29091977)
Supplement: Supplementary file 1 [file molecules-29-01977-s001.zip]

Archive with 9 entries (9 files):
- Figure S4-Uncropped WB.pdf
- Figures S1-S3.pdf
- Table S1-PZR-N.xlsx
- Table S2-PZR-C.xlsx
- Table S3-PD1-N-ITIM.xlsx
- Table S4-PD1-N-ITIM(pY).xlsx
- Table S5-PD1-C-ITSM(pY).xlsx
- Table S6-PD1-C-ITSM.xlsx
- Table S7-SHP2.xlsx
