# Supplementary material for: Probing the Immunoreceptor Tyrosine-Based Inhibition Motif Interaction Protein Partners with Proteomics
Source: Molecules. 2024 Apr 25;29(9):1977. doi: 10.3390/molecules29091977 (PMC11085718; doi:10.3390/molecules29091977)
Supplement: Supplementary file 1 [file molecules-29-01977-s001.zip › Table S1-PZR-N.xlsx]

## Sheet: Proteins
Checked	Protein FDR Confidence	Master	Accession	Description	Exp. q-value	Sum PEP Score	Coverage	# Peptides	# PSMs	# Unique Peptides	# Protein Groups	# AAs	MW [kDa]	calc. pI	Found in Sample: [S1] F1: Light, Control, 1	Found in Sample: [S2] F2: Light, Control, 1	Found in Sample: [S3] F1: Medium, Sample, 2	Found in Sample: [S4] F2: Medium, Sample, 2	Modifications	Entrez Gene ID	Ensembl Gene ID	Gene ID	Chromosome	Biological Process	Cellular Component	Molecular Function	Pfam IDs	emPAI	Score Mascot	# Peptides Mascot
TRUE	High	Master Protein	P02768	Serum albumin OS=Homo sapiens GN=ALB PE=1 SV=2	0	196.702	65.0246	35	1361	35	1	609	69.3	6.28	Not Found	Not Found	Not Found	Not Found		213	ENSG00000163631.16	ALB	4	cell communication;cell organization and biogenesis;metabolic process;regulation of biological process;response to stimulus;transport	cytoplasm;endoplasmic reticulum;extracellular;Golgi;nucleus;organelle lumen	antioxidant activity;catalytic activity;DNA binding;metal ion binding;protein binding	Pf00273	24.396	39758	35
TRUE	High	Master Protein	P04406	Glyceraldehyde-3-phosphate dehydrogenase OS=Homo sapiens GN=GAPDH PE=1 SV=3	0	57.462	33.1343	5	50	5	1	335	36	8.46	Not Found	Not Found	Not Found	Not Found		2597	ENSG00000111640.14	GAPDH	12	cell death;cell organization and biogenesis;defense response;metabolic process;regulation of biological process;response to stimulus	cytoplasm;cytoskeleton;cytosol;membrane;nucleus	catalytic activity;enzyme regulator activity;nucleotide binding;protein binding	Pf00044, Pf02800	3.16	1190	5
TRUE	High	Master Protein	P10809	60 kDa heat shock protein, mitochondrial OS=Homo sapiens GN=HSPD1 PE=1 SV=2	0	52.511	24.0838	7	25	7	1	573	61	5.87	Not Found	Not Found	Not Found	Not Found		3329	ENSG00000144381.16	HSPD1	2	cell organization and biogenesis;cell proliferation;metabolic process;regulation of biological process;response to stimulus;transport	cell surface;cytoplasm;cytosol;endosome;membrane;mitochondrion;organelle lumen	catalytic activity;DNA binding;nucleotide binding;protein binding;RNA binding	Pf00118	1.154	847	7
TRUE	High	Master Protein	P06733	Alpha-enolase OS=Homo sapiens GN=ENO1 PE=1 SV=2	0	50.643	31.106	8	49	8	1	434	47.1	7.39	Not Found	Not Found	Not Found	Not Found		2023	ENSG00000074800.13	ENO1	1	metabolic process;regulation of biological process;response to stimulus	cell surface;cytoplasm;cytosol;membrane;nucleus	catalytic activity;DNA binding;metal ion binding;protein binding;RNA binding	Pf00113, Pf03952, Pf13378	2.039	1570	8
TRUE	High	Master Protein	P02787	Serotransferrin OS=Homo sapiens GN=TF PE=1 SV=3	0	49.916	21.7765	7	48	7	1	698	77	7.12	Not Found	Not Found	Not Found	Not Found		7018	ENSG00000091513.14	TF	3	cell organization and biogenesis;cellular homeostasis;metabolic process;regulation of biological process;response to stimulus;transport	cell surface;endosome;extracellular;membrane;organelle lumen	enzyme regulator activity;metal ion binding;protein binding;transporter activity	Pf00405, Pf12974	1.387	846	7
TRUE	High	Master Protein	P01857	Immunoglobulin heavy constant gamma 1 OS=Homo sapiens GN=IGHG1 PE=1 SV=1	0	43.085	36.0606	8	91	3	1	330	36.1	8.19	Not Found	Not Found	Not Found	Not Found		3500	ENSG00000277633.5; ENSG00000211896.7	IGHG1	14; CHR_HSCHR14_3_CTG1	cell organization and biogenesis;cellular component movement;defense response;metabolic process;regulation of biological process;response to stimulus;transport	extracellular;membrane	catalytic activity;metal ion binding;protein binding	Pf07654, Pf08205	6.356	2460	8
TRUE	High	Master Protein	P01009	Alpha-1-antitrypsin OS=Homo sapiens GN=SERPINA1 PE=1 SV=3	0	36.472	18.8995	6	66	6	1	418	46.7	5.59	Not Found	Not Found	Not Found	Not Found		5265	ENSG00000197249.13	SERPINA1	14	cell organization and biogenesis;coagulation;defense response;metabolic process;regulation of biological process;response to stimulus;transport	endoplasmic reticulum;extracellular;Golgi;membrane;organelle lumen	enzyme regulator activity;protein binding	Pf00079	1.154	1369	6
TRUE	High	Master Protein	P60709	Actin, cytoplasmic 1 OS=Homo sapiens GN=ACTB PE=1 SV=1	0	33.796	14.4	3	28	3	1	375	41.7	5.48	Not Found	Not Found	Not Found	Not Found		60	ENSG00000075624.13	ACTB	7	cell organization and biogenesis;cellular component movement;metabolic process;regulation of biological process;response to stimulus	cytoplasm;cytoskeleton;cytosol;membrane;nucleus	DNA binding;nucleotide binding;protein binding;structural molecule activity	Pf00022	1.228	1056	3
TRUE	High	Master Protein	P01859	Immunoglobulin heavy constant gamma 2 OS=Homo sapiens GN=IGHG2 PE=1 SV=2	0	30.653	24.5399	5	78	2	1	326	35.9	7.59	Not Found	Not Found	Not Found	Not Found		3501	ENSG00000211893.3; ENSG00000274497.2	IGHG2	14; CHR_HSCHR14_3_CTG1	cell organization and biogenesis;defense response;metabolic process;regulation of biological process;response to stimulus	extracellular;membrane	catalytic activity;protein binding	Pf07654, Pf08205	1.276	2188	5
TRUE	High	Master Protein	P01023	Alpha-2-macroglobulin OS=Homo sapiens GN=A2M PE=1 SV=3	0	28.766	11.194	8	52	8	1	1474	163.2	6.46	Not Found	Not Found	Not Found	Not Found		2	ENSG00000175899.14	A2M	12	cell differentiation;cell organization and biogenesis;metabolic process;regulation of biological process;response to stimulus;transport	cytosol;extracellular;organelle lumen	enzyme regulator activity;protein binding	Pf00207, Pf01835, Pf07677, Pf07678, Pf07703, Pf10569, Pf11974, Pf13249	0.362	670	8
TRUE	High	Master Protein	P68366	Tubulin alpha-4A chain OS=Homo sapiens GN=TUBA4A PE=1 SV=1	0	25.398	21.4286	5	14	3	1	448	49.9	5.06	Not Found	Not Found	Not Found	Not Found		7277	ENSG00000127824.13	TUBA4A	2	cell organization and biogenesis;regulation of biological process;transport	cytoplasm;cytoskeleton;cytosol;extracellular	catalytic activity;nucleotide binding;protein binding;structural molecule activity	Pf00091, Pf03953	0.957	412	5
TRUE	High	Master Protein	P14618	Pyruvate kinase PKM OS=Homo sapiens GN=PKM PE=1 SV=4	0	25.121	24.6704	9	15	9	1	531	57.9	7.84	Not Found	Not Found	Not Found	Not Found		5315	ENSG00000067225.17	PKM	15	cell death;cell organization and biogenesis;metabolic process;response to stimulus;transport	cytoplasm;cytosol;extracellular;mitochondrion;nucleus;organelle lumen	catalytic activity;metal ion binding;nucleotide binding;protein binding;RNA binding	Pf00224, Pf02887	0.983	295	9
TRUE	High	Master Protein	P01024	Complement C3 OS=Homo sapiens GN=C3 PE=1 SV=2	0	24.983	10.3428	10	28	10	1	1663	187	6.4	Not Found	Not Found	Not Found	Not Found		718	ENSG00000125730.16	C3	19	cell organization and biogenesis;defense response;metabolic process;regulation of biological process;response to stimulus;transport	extracellular;membrane;organelle lumen	catalytic activity;enzyme regulator activity;protein binding	Pf00207, Pf01759, Pf01821, Pf01835, Pf07677, Pf07678, Pf07703, Pf10569, Pf11974	0.262	407	10
TRUE	High	Master Protein	Q9BQE3	Tubulin alpha-1C chain OS=Homo sapiens GN=TUBA1C PE=1 SV=1	0	21.772	16.4811	4	8	2	1	449	49.9	5.1	Not Found	Not Found	Not Found	Not Found		84790	ENSG00000167553.15	TUBA1C	12	cell division;cell organization and biogenesis;transport	cytoplasm;cytoskeleton;nucleus	catalytic activity;nucleotide binding;protein binding;structural molecule activity	Pf00091, Pf03953	0.616	311	4
TRUE	High	Master Protein	P29401	Transketolase OS=Homo sapiens GN=TKT PE=1 SV=3	0	21.651	6.09952	2	7	2	1	623	67.8	7.66	Not Found	Not Found	Not Found	Not Found		7086	ENSG00000163931.15	TKT	3	metabolic process;regulation of biological process	cytosol	catalytic activity;metal ion binding;protein binding	Pf00456, Pf00676, Pf02775, Pf02779, Pf02780, Pf09364	0.212	314	2
TRUE	High	Master Protein	P02766	Transthyretin OS=Homo sapiens GN=TTR PE=1 SV=1	0	21.263	34.6939	2	83	2	1	147	15.9	5.76	Not Found	Not Found	Not Found	Not Found		7276	ENSG00000118271.9	TTR	18	cell organization and biogenesis;metabolic process;regulation of biological process;transport	cytoplasm;extracellular;organelle lumen	protein binding	Pf00576	1.783	593	2
TRUE	High	Master Protein	P07437	Tubulin beta chain OS=Homo sapiens GN=TUBB PE=1 SV=2	0	20.465	27.7027	6	12	4	1	444	49.6	4.89	Not Found	Not Found	Not Found	Not Found		203068	ENSG00000232575.10; ENSG00000196230.12; ENSG00000227739.10; ENSG00000224156.10; ENSG00000235067.10; ENSG00000229684.10; ENSG00000183311.16; ENSG00000232421.10	TUBB	6; CHR_HSCHR6_MHC_MANN_CTG1; CHR_HSCHR6_MHC_COX_CTG1; CHR_HSCHR6_MHC_APD_CTG1; CHR_HSCHR6_MHC_DBB_CTG1; CHR_HSCHR6_MHC_MCF_CTG1; CHR_HSCHR6_MHC_QBL_CTG1; CHR_HSCHR6_MHC_SSTO_CTG1	cell division;cell organization and biogenesis;cellular component movement;defense response;regulation of biological process;response to stimulus;transport	cytoplasm;cytoskeleton;extracellular;membrane;nucleus;organelle lumen	catalytic activity;nucleotide binding;protein binding;structural molecule activity	Pf00091, Pf03953, Pf10644	1.228	268	6
TRUE	High	Master Protein	P04114	Apolipoprotein B-100 OS=Homo sapiens GN=APOB PE=1 SV=2	0	19.342	2.45453	6	8	6	1	4563	515.3	7.05	Not Found	Not Found	Not Found	Not Found		338		APOB	2	cell organization and biogenesis;cellular component movement;metabolic process;regulation of biological process;response to stimulus;transport	cytoplasm;cytosol;endoplasmic reticulum;endosome;extracellular;membrane;organelle lumen	protein binding;transporter activity	Pf01347, Pf04286, Pf06448, Pf09172, Pf12491	0.055	202	6
TRUE	High	Master Protein	P05787	Keratin, type II cytoskeletal 8 OS=Homo sapiens GN=KRT8 PE=1 SV=7	0	18.725	21.7391	7	15	6	1	483	53.7	5.59	Not Found	Not Found	Not Found	Not Found		3856	ENSG00000170421.12	KRT8	12	cell death;cell differentiation;cell organization and biogenesis;regulation of biological process;response to stimulus	cytoplasm;cytoskeleton;cytosol;membrane;nucleus	catalytic activity;motor activity;protein binding;structural molecule activity	Pf00038, Pf01576, Pf13166, Pf15003	0.719	356	7
TRUE	High	Master Protein	P01011	Alpha-1-antichymotrypsin OS=Homo sapiens GN=SERPINA3 PE=1 SV=2	0	18.139	13.948	4	9	4	1	423	47.6	5.52	Not Found	Not Found	Not Found	Not Found		12	ENSG00000196136.17	SERPINA3	14	defense response;regulation of biological process;response to stimulus;transport	extracellular;nucleus;organelle lumen	DNA binding;enzyme regulator activity;protein binding	Pf00079	0.778	222	4
TRUE	High	Master Protein	P23528	Cofilin-1 OS=Homo sapiens GN=CFL1 PE=1 SV=3	0	16.211	48.7952	6	9	6	1	166	18.5	8.09	Not Found	Not Found	Not Found	Not Found		1072	ENSG00000172757.12	CFL1	11	cell organization and biogenesis;cellular component movement;metabolic process;regulation of biological process;response to stimulus	cytoplasm;cytoskeleton;cytosol;membrane;nucleus	protein binding	Pf00241	2.831	148	6
TRUE	High	Master Protein	P01861	Immunoglobulin heavy constant gamma 4 OS=Homo sapiens GN=IGHG4 PE=1 SV=1	0	15.876	31.1927	6	8	1	1	327	35.9	7.36	Not Found	Not Found	Not Found	Not Found		3503	ENSG00000211892.3; ENSG00000277016.2	IGHG4	14; CHR_HSCHR14_3_CTG1	cell organization and biogenesis;defense response;metabolic process;regulation of biological process;response to stimulus	extracellular;membrane	catalytic activity;protein binding	Pf07654, Pf08205	1.512	242	6
TRUE	High	Master Protein	Q04695	Keratin, type I cytoskeletal 17 OS=Homo sapiens GN=KRT17 PE=1 SV=2	0	15.72	13.8889	4	11	4	1	432	48.1	5.02	Not Found	Not Found	Not Found	Not Found		3872	ENSG00000128422.15	KRT17	17	cell death;cell organization and biogenesis;regulation of biological process;response to stimulus	cytoplasm;cytoskeleton;cytosol	protein binding;receptor activity;signal transducer activity;structural molecule activity	Pf00038, Pf07888	0.389	403	4
TRUE	High	Master Protein	P04075	Fructose-bisphosphate aldolase A OS=Homo sapiens GN=ALDOA PE=1 SV=2	0	15.037	32.6923	6	11	6	1	364	39.4	8.09	Not Found	Not Found	Not Found	Not Found		226	ENSG00000149925.17	ALDOA	16	cell organization and biogenesis;cellular homeostasis;metabolic process;regulation of biological process;transport	cytoplasm;cytoskeleton;cytosol;extracellular;membrane;nucleus;organelle lumen	catalytic activity;protein binding;RNA binding	Pf00274	1.015	122	6
TRUE	High	Master Protein	P62937	Peptidyl-prolyl cis-trans isomerase A OS=Homo sapiens GN=PPIA PE=1 SV=2	0	14.49	39.3939	4	7	4	1	165	18	7.81	Not Found	Not Found	Not Found	Not Found		5478	ENSG00000196262.13	PPIA	7	cell organization and biogenesis;cellular component movement;metabolic process;regulation of biological process;response to stimulus;transport	cytoplasm;cytosol;extracellular;membrane;nucleus;organelle lumen	catalytic activity;protein binding;RNA binding	Pf00160	1.276	197	4
TRUE	High	Master Protein	P00558	Phosphoglycerate kinase 1 OS=Homo sapiens GN=PGK1 PE=1 SV=3	0	14.304	17.0264	4	7	4	1	417	44.6	8.1	Not Found	Not Found	Not Found	Not Found		5230	ENSG00000102144.13	PGK1	X	cell differentiation;metabolic process;regulation of biological process;response to stimulus	cytoplasm;cytosol;membrane	catalytic activity;nucleotide binding;protein binding	Pf00162	0.468	187	4
TRUE	High	Master Protein	P02745	Complement C1q subcomponent subunit A OS=Homo sapiens GN=C1QA PE=1 SV=2	0	13.854	11.0204	1	2	1	1	245	26	9.11	Not Found	Not Found	Not Found	Not Found		712	ENSG00000173372.16	C1QA	1	cell communication;defense response;metabolic process;regulation of biological process;response to stimulus	extracellular;membrane	catalytic activity;protein binding	Pf00229, Pf00386, Pf01391	0.359	87	1
TRUE	High	Master Protein	P35232	Prohibitin OS=Homo sapiens GN=PHB PE=1 SV=1	0	11.484	16.1765	2	3	2	1	272	29.8	5.76	Not Found	Not Found	Not Found	Not Found		5245	ENSG00000167085.11	PHB	17	cell differentiation;cell organization and biogenesis;metabolic process;regulation of biological process;response to stimulus;transport	cell surface;cytoplasm;endosome;membrane;mitochondrion;nucleus	DNA binding;protein binding	Pf01145	0.468	163	2
TRUE	High	Master Protein	P01860	Immunoglobulin heavy constant gamma 3 OS=Homo sapiens GN=IGHG3 PE=1 SV=2	0	11.368	18.0371	5	7	1	1	377	41.3	7.9	Not Found	Not Found	Not Found	Not Found		3502		IGHG3	14	cell organization and biogenesis;defense response;metabolic process;regulation of biological process;response to stimulus	extracellular;membrane	catalytic activity;protein binding	Pf07654, Pf08205	0.896	101	5
TRUE	High	Master Protein	P68104	Elongation factor 1-alpha 1 OS=Homo sapiens GN=EEF1A1 PE=1 SV=1	0	10.979	11.039	3	19	3	1	462	50.1	9.01	Not Found	Not Found	Not Found	Not Found		1915	ENSG00000156508.17	EEF1A1	6	metabolic process;regulation of biological process;response to stimulus;transport	cytoplasm;cytoskeleton;cytosol;extracellular;membrane;nucleus;organelle lumen	catalytic activity;nucleotide binding;protein binding;RNA binding	Pf00009, Pf03143, Pf03144	0.318	253	3
TRUE	High	Master Protein	P06748	Nucleophosmin OS=Homo sapiens GN=NPM1 PE=1 SV=2	0	10.834	13.6054	2	4	2	1	294	32.6	4.78	Not Found	Not Found	Not Found	Not Found		4869	ENSG00000181163.13	NPM1	5	cell growth;cell organization and biogenesis;cellular homeostasis;metabolic process;regulation of biological process;response to stimulus;transport	cytoplasm;cytoskeleton;cytosol;membrane;nucleus	DNA binding;enzyme regulator activity;protein binding;RNA binding	Pf03066	0.468	130	2
TRUE	High	Master Protein	P00450	Ceruloplasmin OS=Homo sapiens GN=CP PE=1 SV=1	0	10.614	3.56808	2	6	2	1	1065	122.1	5.72	Not Found	Not Found	Not Found	Not Found		1356		CP	3	cellular homeostasis;metabolic process;transport	extracellular;membrane;organelle lumen	catalytic activity;metal ion binding;protein binding	Pf00394, Pf07731, Pf07732	0.182	158	2
TRUE	High	Master Protein	P02790	Hemopexin OS=Homo sapiens GN=HPX PE=1 SV=2	0	10.068	15.8009	3	3	3	1	462	51.6	7.02	Not Found	Not Found	Not Found	Not Found		3263	ENSG00000110169.10	HPX	11	cellular homeostasis;metabolic process;regulation of biological process;transport	extracellular;organelle lumen	metal ion binding;protein binding;transporter activity	Pf00045	0.304	72	3
TRUE	High	Master Protein	P01871	Immunoglobulin heavy constant mu OS=Homo sapiens GN=IGHM PE=1 SV=4	0	10.041	10.596	2	5	2	1	453	49.4	6.77	Not Found	Not Found	Not Found	Not Found		3507	ENSG00000282657.3; ENSG00000211899.9	IGHM	CHR_HSCHR14_3_CTG1; 14	cell organization and biogenesis;cellular component movement;defense response;metabolic process;regulation of biological process;response to stimulus	cell surface;extracellular;membrane	DNA binding;protein binding	Pf00047, Pf07654, Pf08205	0.172	144	2
TRUE	High	Master Protein	P04350	Tubulin beta-4A chain OS=Homo sapiens GN=TUBB4A PE=1 SV=2	0	9.888	14.8649	3	4	1	1	444	49.6	4.88	Not Found	Not Found	Not Found	Not Found		10382	ENSG00000104833.11	TUBB4A	19	cell organization and biogenesis;regulation of biological process	cytoplasm;cytoskeleton;cytosol;nucleus	catalytic activity;metal ion binding;nucleotide binding;protein binding;structural molecule activity	Pf00091, Pf03953, Pf10644	0.35	167	3
TRUE	High	Master Protein	P07737	Profilin-1 OS=Homo sapiens GN=PFN1 PE=1 SV=2	0	9.833	21.4286	2	6	2	1	140	15	8.27	Not Found	Not Found	Not Found	Not Found		5216	ENSG00000108518.7	PFN1	17	cell organization and biogenesis;regulation of biological process;response to stimulus	cytoplasm;cytoskeleton;cytosol;membrane;nucleus	enzyme regulator activity;nucleotide binding;protein binding;RNA binding	Pf00235	1.783	173	2
TRUE	High	Master Protein	P02753	Retinol-binding protein 4 OS=Homo sapiens GN=RBP4 PE=1 SV=3	0	9.653	25.8706	2	6	2	1	201	23	6.07	Not Found	Not Found	Not Found	Not Found		5950	ENSG00000138207.13	RBP4	10	metabolic process;regulation of biological process;response to stimulus;transport	cytosol;extracellular	protein binding;transporter activity	Pf00061, Pf08212	0.585	213	2
TRUE	High	Master Protein	P62805	Histone H4 OS=Homo sapiens GN=HIST1H4A PE=1 SV=2	0	9.534	30.0971	4	9	4	1	103	11.4	11.36	Not Found	Not Found	Not Found	Not Found		8359; 8361; 8360; 8363; 8365; 8364; 121504; 554313; 8367; 8294; 8366; 8370; 8362; 8368	ENSG00000197061.4; ENSG00000275126.1; ENSG00000273542.1; ENSG00000197238.4; ENSG00000197837.3; ENSG00000276966.2; ENSG00000158406.4; ENSG00000270882.2; ENSG00000274618.1; ENSG00000278637.1; ENSG00000277157.1; ENSG00000278705.1; ENSG00000270276.2; ENSG00000276180.1	HIST1H4A; HIST1H4F; HIST1H4D; HIST1H4J; HIST1H4H; HIST1H4C; HIST4H4; HIST2H4B; HIST1H4E; HIST1H4I; HIST1H4B; HIST2H4A; HIST1H4K; HIST1H4L	6; 12; 1	cell organization and biogenesis;metabolic process;regulation of biological process;response to stimulus	chromosome;extracellular;membrane;nucleus	DNA binding;protein binding;RNA binding	Pf00125, Pf02969, Pf15630	5.813	235	4
TRUE	High	Master Protein	P01834	Immunoglobulin kappa constant OS=Homo sapiens GN=IGKC PE=1 SV=2	0	9.51	34.5794	2	8	2	1	107	11.8	6.52	Not Found	Not Found	Not Found	Not Found		3514		IGKC	2	cell organization and biogenesis;cellular component movement;defense response;metabolic process;regulation of biological process;response to stimulus;transport	extracellular;membrane	catalytic activity;protein binding	Pf07654	2.981	170	2
TRUE	High	Master Protein	P07355	Annexin A2 OS=Homo sapiens GN=ANXA2 PE=1 SV=2	0	9.292	11.7994	3	8	3	1	339	38.6	7.75	Not Found	Not Found	Not Found	Not Found		302	ENSG00000182718.16	ANXA2	15	cell organization and biogenesis;metabolic process;regulation of biological process;response to stimulus;transport	cell surface;cytoplasm;cytosol;endoplasmic reticulum;endosome;extracellular;membrane;nucleus;organelle lumen	enzyme regulator activity;metal ion binding;protein binding;RNA binding	Pf00191	0.468	129	3
TRUE	High	Master Protein	P08238	Heat shock protein HSP 90-beta OS=Homo sapiens GN=HSP90AB1 PE=1 SV=4	0	9.15	4.41989	2	7	2	1	724	83.2	5.03	Not Found	Not Found	Not Found	Not Found		3326	ENSG00000096384.19	HSP90AB1	6	cell organization and biogenesis;metabolic process;regulation of biological process;response to stimulus;transport	cell surface;cytoplasm;cytosol;extracellular;membrane;mitochondrion;nucleus;organelle lumen	enzyme regulator activity;nucleotide binding;protein binding;RNA binding	Pf00183, Pf02518, Pf13589	0.239	202	2
TRUE	High	Master Protein	P31943	Heterogeneous nuclear ribonucleoprotein H OS=Homo sapiens GN=HNRNPH1 PE=1 SV=4	0	9.024	7.34967	2	4	2	1	449	49.2	6.3	Not Found	Not Found	Not Found	Not Found		3187	ENSG00000169045.17; ENSG00000284254.1	HNRNPH1	5; CHR_HG30_PATCH	metabolic process;regulation of biological process;response to stimulus	cytosol;membrane;nucleus;spliceosomal complex	protein binding;RNA binding	Pf00076, Pf08080, Pf14259	0.445	108	2
TRUE	High	Master Protein	P60174	Triosephosphate isomerase OS=Homo sapiens GN=TPI1 PE=1 SV=3	0	8.829	20.979	3	5	3	1	286	30.8	5.92	Not Found	Not Found	Not Found	Not Found		7167	ENSG00000111669.14	TPI1	12	development;metabolic process	cytosol;nucleus	catalytic activity;protein binding	Pf00121	0.438	147	3
TRUE	High	Master Protein	Q01082	Spectrin beta chain, non-erythrocytic 1 OS=Homo sapiens GN=SPTBN1 PE=1 SV=2	0	8.494	0.846024	1	2	1	1	2364	274.4	5.57	Not Found	Not Found	Not Found	Not Found		6711	ENSG00000115306.15	SPTBN1	2	cell organization and biogenesis;cellular component movement;metabolic process;regulation of biological process;response to stimulus;transport	cytoplasm;cytoskeleton;cytosol;membrane;nucleus	protein binding;RNA binding;structural molecule activity	Pf00169, Pf00307, Pf00435, Pf11971, Pf12128, Pf15410	0.029	80	1
TRUE	High	Master Protein	Q06830	Peroxiredoxin-1 OS=Homo sapiens GN=PRDX1 PE=1 SV=1	0	8.448	12.0603	1	5	1	1	199	22.1	8.13	Not Found	Not Found	Not Found	Not Found		5052	ENSG00000117450.13	PRDX1	1	cell proliferation;cellular homeostasis;defense response;metabolic process;regulation of biological process;response to stimulus	cytoplasm;cytosol;mitochondrion;nucleus	antioxidant activity;catalytic activity;protein binding;RNA binding	Pf00578, Pf08534, Pf10417	0.389	65	1
TRUE	High	Master Protein	P02647	Apolipoprotein A-I OS=Homo sapiens GN=APOA1 PE=1 SV=1	0	8.15	18.7266	4	6	4	1	267	30.8	5.76	Not Found	Not Found	Not Found	Not Found		335	ENSG00000118137.9	APOA1	11	cell organization and biogenesis;cell proliferation;cellular component movement;metabolic process;regulation of biological process;response to stimulus;transport	cell surface;cytosol;endosome;extracellular;membrane;nucleus;organelle lumen	enzyme regulator activity;protein binding;transporter activity	Pf01442	0.551	174	4
TRUE	High	Master Protein	P30041	Peroxiredoxin-6 OS=Homo sapiens GN=PRDX6 PE=1 SV=3	0	6.722	16.9643	2	3	2	1	224	25	6.38	Not Found	Not Found	Not Found	Not Found		9588	ENSG00000117592.8	PRDX6	1	cellular homeostasis;metabolic process;regulation of biological process;response to stimulus;transport	cytoplasm;cytosol;extracellular;membrane;nucleus;organelle lumen;vacuole	antioxidant activity;catalytic activity;protein binding	Pf00578, Pf08534, Pf10417	0.334	113	2
TRUE	High	Master Protein	Q00839	Heterogeneous nuclear ribonucleoprotein U OS=Homo sapiens GN=HNRNPU PE=1 SV=6	0	6.655	4	2	2	2	1	825	90.5	6	Not Found	Not Found	Not Found	Not Found		3192	ENSG00000153187.18	HNRNPU	1	cell differentiation;metabolic process;regulation of biological process;response to stimulus	cell surface;chromosome;cytoplasm;membrane;nucleus;spliceosomal complex	DNA binding;nucleotide binding;protein binding;RNA binding	Pf00622, Pf13671	0.108	76	2
TRUE	High	Master Protein	P61247	40S ribosomal protein S3a OS=Homo sapiens GN=RPS3A PE=1 SV=2	0	6.434	6.43939	1	3	1	1	264	29.9	9.73	Not Found	Not Found	Not Found	Not Found		6189	ENSG00000145425.9	RPS3A	4	cell differentiation;cell organization and biogenesis;metabolic process;regulation of biological process;transport	cytoplasm;cytosol;endoplasmic reticulum;nucleus;ribosome	protein binding;RNA binding;structural molecule activity	Pf01015	0.274	94	1
TRUE	High	Master Protein	P06576	ATP synthase subunit beta, mitochondrial OS=Homo sapiens GN=ATP5B PE=1 SV=3	0	6.432	8.69565	3	4	3	1	529	56.5	5.4	Not Found	Not Found	Not Found	Not Found		506	ENSG00000110955.8	ATP5B	12	cell differentiation;cell organization and biogenesis;cellular homeostasis;metabolic process;regulation of biological process;transport	cell surface;membrane;mitochondrion;nucleus;organelle lumen	catalytic activity;nucleotide binding;protein binding;transporter activity	Pf00006, Pf00306, Pf02874	0.25	118	3
TRUE	High	Master Protein	P38646	Stress-70 protein, mitochondrial OS=Homo sapiens GN=HSPA9 PE=1 SV=2	0	6.42	4.86009	2	2	2	1	679	73.6	6.16	Not Found	Not Found	Not Found	Not Found		3313	ENSG00000113013.12	HSPA9	5	cell differentiation;cell organization and biogenesis;metabolic process;regulation of biological process;response to stimulus	cytoplasm;mitochondrion;nucleus;organelle lumen	nucleotide binding;protein binding;RNA binding	Pf00012, Pf06723	0.11	129	2
TRUE	High	Master Protein	P07910	Heterogeneous nuclear ribonucleoproteins C1/C2 OS=Homo sapiens GN=HNRNPC PE=1 SV=4	0	6.342	12.7451	3	4	3	1	306	33.7	5.08	Not Found	Not Found	Not Found	Not Found		3183	ENSG00000092199.17	HNRNPC	14	cell differentiation;cell organization and biogenesis;metabolic process;regulation of biological process	cytoskeleton;cytosol;extracellular;membrane;nucleus;spliceosomal complex	DNA binding;protein binding;RNA binding	Pf00076, Pf13893, Pf14259	0.35	89	3
TRUE	High	Master Protein	Q00610	Clathrin heavy chain 1 OS=Homo sapiens GN=CLTC PE=1 SV=5	0	6.29	2.02985	2	2	2	1	1675	191.5	5.69	Not Found	Not Found	Not Found	Not Found		1213	ENSG00000141367.11	CLTC	17	cell differentiation;cell division;cell organization and biogenesis;cellular component movement;metabolic process;regulation of biological process;response to stimulus;transport	cytoplasm;cytoskeleton;cytosol;endosome;membrane;vacuole	protein binding;RNA binding;structural molecule activity	Pf00637, Pf01394, Pf04053, Pf09268, Pf13838	0.05	49	2
TRUE	High	Master Protein	P21333	Filamin-A OS=Homo sapiens GN=FLNA PE=1 SV=4	0	6.069	2.04005	3	5	3	1	2647	280.6	6.06	Not Found	Not Found	Not Found	Not Found		2316	ENSG00000196924.14	FLNA	X	cell organization and biogenesis;cellular component movement;metabolic process;regulation of biological process;response to stimulus;transport	cytoplasm;cytoskeleton;cytosol;extracellular;membrane;nucleus	protein binding;RNA binding;signal transducer activity	Pf00307, Pf00630	0.046	76	3
TRUE	High	Master Protein	P69905	Hemoglobin subunit alpha OS=Homo sapiens GN=HBA1 PE=1 SV=2	0	5.758	40.8451	2	2	2	1	142	15.2	8.68	Not Found	Not Found	Not Found	Not Found		3040; 3039	ENSG00000206172.8; ENSG00000188536.12	HBA2; HBA1	16	cell organization and biogenesis;metabolic process;regulation of biological process;response to stimulus;transport	cytosol;extracellular;membrane;organelle lumen	antioxidant activity;catalytic activity;metal ion binding;protein binding;transporter activity	Pf00042	0.778	36	2
TRUE	High	Master Protein	P02765	Alpha-2-HS-glycoprotein OS=Homo sapiens GN=AHSG PE=1 SV=1	0	5.656	6.53951	1	28	1	1	367	39.3	5.72	Not Found	Not Found	Not Found	Not Found		197		AHSG	3	defense response;metabolic process;regulation of biological process;response to stimulus;transport	extracellular;Golgi;organelle lumen	enzyme regulator activity	Pf00031	0.292	357	1
TRUE	High	Master Protein	O43707	Alpha-actinin-4 OS=Homo sapiens GN=ACTN4 PE=1 SV=2	0	5.626	4.93963	3	4	3	1	911	104.8	5.44	Not Found	Not Found	Not Found	Not Found		81	ENSG00000282844.1; ENSG00000130402.11	ACTN4	19; CHR_HG26_PATCH	cell organization and biogenesis;cellular component movement;regulation of biological process;response to stimulus;transport	cytoplasm;cytoskeleton;cytosol;extracellular;nucleus;organelle lumen	DNA binding;metal ion binding;protein binding;RNA binding	Pf00307, Pf00435, Pf08726, Pf11971, Pf13499	0.116	83	3
TRUE	High	Master Protein	P61604	10 kDa heat shock protein, mitochondrial OS=Homo sapiens GN=HSPE1 PE=1 SV=2	0	5.476	25.4902	2	6	2	1	102	10.9	8.92	Not Found	Not Found	Not Found	Not Found		3336	ENSG00000115541.10	HSPE1	2	cell differentiation;metabolic process;regulation of biological process;response to stimulus	cytoplasm;membrane;mitochondrion;organelle lumen	metal ion binding;nucleotide binding;protein binding;RNA binding	Pf00166	0.585	203	2
TRUE	High	Master Protein	P55072	Transitional endoplasmic reticulum ATPase OS=Homo sapiens GN=VCP PE=1 SV=4	0	5.377	6.82382	2	2	2	1	806	89.3	5.26	Not Found	Not Found	Not Found	Not Found		7415	ENSG00000165280.15	VCP	9	cell communication;cell organization and biogenesis;metabolic process;regulation of biological process;response to stimulus;transport	cytoplasm;cytosol;endoplasmic reticulum;extracellular;membrane;nucleus;organelle lumen;proteasome	catalytic activity;enzyme regulator activity;nucleotide binding;protein binding;RNA binding	Pf00004, Pf00910, Pf01057, Pf01078, Pf02359, Pf02933, Pf05496, Pf05673, Pf06068, Pf07724, Pf07726, Pf07728, Pf09336, Pf13191, Pf13207, Pf13401	0.101	73	2
TRUE	High	Master Protein	P22626	Heterogeneous nuclear ribonucleoproteins A2/B1 OS=Homo sapiens GN=HNRNPA2B1 PE=1 SV=2	0	5.342	11.6147	2	6	2	1	353	37.4	8.95	Not Found	Not Found	Not Found	Not Found		3181	ENSG00000122566.20	HNRNPA2B1	7	metabolic process;regulation of biological process;response to stimulus;transport	cytoplasm;extracellular;membrane;nucleus;spliceosomal complex	DNA binding;protein binding;RNA binding	Pf00076, Pf13893, Pf14259	0.274	185	2
TRUE	High	Master Protein	P0C0L4	Complement C4-A OS=Homo sapiens GN=C4A PE=1 SV=2	0	5.065	1.20413	1	1	1	1	1744	192.7	7.08	Not Found	Not Found	Not Found	Not Found		720; 721	ENSG00000244731.7	C4A; C4B	6	defense response;metabolic process;regulation of biological process;response to stimulus	extracellular;membrane;organelle lumen	catalytic activity;enzyme regulator activity;protein binding	Pf00207, Pf01759, Pf01821, Pf01835, Pf07677, Pf07678, Pf07703, Pf10569, Pf11974, Pf13249	0.024	71	1
TRUE	High	Master Protein	P12956	X-ray repair cross-complementing protein 6 OS=Homo sapiens GN=XRCC6 PE=1 SV=2	0	5.059	3.61248	1	2	1	1	609	69.8	6.64	Not Found	Not Found	Not Found	Not Found		2547	ENSG00000196419.12	XRCC6	22	cell organization and biogenesis;defense response;metabolic process;regulation of biological process;response to stimulus;transport	chromosome;cytoplasm;cytosol;extracellular;membrane;nucleus;organelle lumen	catalytic activity;DNA binding;nucleotide binding;protein binding;RNA binding	Pf02037, Pf02735, Pf03730, Pf03731	0.122	77	1
TRUE	High	Master Protein	P02545	Prelamin-A/C OS=Homo sapiens GN=LMNA PE=1 SV=1	0	4.689	6.1747	2	2	2	1	664	74.1	7.02	Not Found	Not Found	Not Found	Not Found		4000	ENSG00000160789.19	LMNA	1	cell organization and biogenesis;regulation of biological process;response to stimulus;transport	cytosol;membrane;nucleus	protein binding;structural molecule activity	Pf00038, Pf00932	0.108	96	2
TRUE	High	Master Protein	P07814	Bifunctional glutamate/proline--tRNA ligase OS=Homo sapiens GN=EPRS PE=1 SV=5	0	4.678	1.85185	1	1	1	1	1512	170.5	7.33	Not Found	Not Found	Not Found	Not Found		2058	ENSG00000136628.17	EPRS	1	cell organization and biogenesis;metabolic process;regulation of biological process;response to stimulus	cytoplasm;cytosol;membrane	catalytic activity;metal ion binding;nucleotide binding;protein binding;RNA binding	Pf00458, Pf00587, Pf00749, Pf01406, Pf03129, Pf03950, Pf09180, Pf14497	0.025	33	1
TRUE	High	Master Protein	P09651	Heterogeneous nuclear ribonucleoprotein A1 OS=Homo sapiens GN=HNRNPA1 PE=1 SV=5	0	4.647	8.33333	2	5	2	1	372	38.7	9.13	Not Found	Not Found	Not Found	Not Found		3178	ENSG00000135486.17	HNRNPA1	12	cell communication;metabolic process;regulation of biological process;response to stimulus;transport	cytoplasm;membrane;nucleus;spliceosomal complex	DNA binding;protein binding;RNA binding	Pf00076, Pf13893, Pf14259	0.259	173	2
TRUE	High	Master Protein	P52272	Heterogeneous nuclear ribonucleoprotein M OS=Homo sapiens GN=HNRNPM PE=1 SV=3	0	4.614	3.15068	1	1	1	1	730	77.5	8.7	Not Found	Not Found	Not Found	Not Found		4670	ENSG00000099783.11	HNRNPM	19	metabolic process;regulation of biological process;response to stimulus	membrane;nucleus;spliceosomal complex	protein binding;RNA binding	Pf00076, Pf11532, Pf11608, Pf13893, Pf14259	0.043	27	1
TRUE	High	Master Protein	O75475	PC4 and SFRS1-interacting protein OS=Homo sapiens GN=PSIP1 PE=1 SV=1	0	4.577	3.20755	1	1	1	1	530	60.1	9.13	Not Found	Not Found	Not Found	Not Found		11168	ENSG00000164985.14	PSIP1	9	cell organization and biogenesis;metabolic process;regulation of biological process;response to stimulus;transport	cytosol;nucleus	DNA binding;metal ion binding;protein binding;RNA binding	Pf00855, Pf11467	0.064	64	1
TRUE	High	Master Protein	P60842	Eukaryotic initiation factor 4A-I OS=Homo sapiens GN=EIF4A1 PE=1 SV=1	0	4.557	8.12808	2	2	2	1	406	46.1	5.48	Not Found	Not Found	Not Found	Not Found		1973	ENSG00000161960.14	EIF4A1	17	metabolic process;regulation of biological process	cytoplasm;cytosol;membrane;nucleus	catalytic activity;DNA binding;nucleotide binding;protein binding;RNA binding	Pf00270, Pf00271, Pf04851	0.212	39	2
TRUE	High	Master Protein	P11142	Heat shock cognate 71 kDa protein OS=Homo sapiens GN=HSPA8 PE=1 SV=1	0	4.488	2.16718	1	3	1	1	646	70.9	5.52	Not Found	Not Found	Not Found	Not Found		3312	ENSG00000109971.13	HSPA8	11	cell communication;cell organization and biogenesis;metabolic process;regulation of biological process;response to stimulus;transport	cytoplasm;cytosol;endosome;extracellular;membrane;nucleus;organelle lumen;spliceosomal complex	catalytic activity;nucleotide binding;protein binding;RNA binding	Pf00012, Pf02463, Pf06723	0.125	50	1
TRUE	High	Master Protein	P48643	T-complex protein 1 subunit epsilon OS=Homo sapiens GN=CCT5 PE=1 SV=1	0	4.204	3.69686	1	1	1	1	541	59.6	5.66	Not Found	Not Found	Not Found	Not Found		22948	ENSG00000150753.11	CCT5	5	metabolic process;regulation of biological process;response to stimulus;transport	cytoplasm;cytoskeleton;cytosol	nucleotide binding;protein binding;RNA binding	Pf00118	0.062	31	1
TRUE	High	Master Protein	P12268	Inosine-5'-monophosphate dehydrogenase 2 OS=Homo sapiens GN=IMPDH2 PE=1 SV=2	0	4.07	3.11284	1	1	1	1	514	55.8	6.9	Not Found	Not Found	Not Found	Not Found		3615	ENSG00000178035.11	IMPDH2	3	cell organization and biogenesis;cell proliferation;metabolic process;response to stimulus;transport	cytoplasm;cytosol;extracellular;membrane;nucleus;organelle lumen	catalytic activity;DNA binding;metal ion binding;nucleotide binding;protein binding;RNA binding	Pf00478, Pf00571, Pf00977, Pf01070, Pf03060	0.089	72	1
TRUE	High	Master Protein	P32969	60S ribosomal protein L9 OS=Homo sapiens GN=RPL9 PE=1 SV=1	0	4.043	11.4583	1	1	1	1	192	21.9	9.95	Not Found	Not Found	Not Found	Not Found		6133	ENSG00000163682.15	RPL9	4	cell organization and biogenesis;metabolic process;transport	cytosol;membrane;nucleus;ribosome	protein binding;RNA binding;structural molecule activity	Pf00347	0.233	48	1
TRUE	High	Master Protein	P53396	ATP-citrate synthase OS=Homo sapiens GN=ACLY PE=1 SV=3	0	4.018	2.63397	2	2	2	1	1101	120.8	7.33	Not Found	Not Found	Not Found	Not Found		47	ENSG00000131473.16	ACLY	17	metabolic process;regulation of biological process;transport	cytoplasm;cytosol;extracellular;membrane;organelle lumen	catalytic activity;metal ion binding;nucleotide binding;protein binding	Pf00285, Pf00549, Pf02629, Pf08442	0.071	55	2
TRUE	High	Master Protein	P39023	60S ribosomal protein L3 OS=Homo sapiens GN=RPL3 PE=1 SV=2	0	3.965	5.45906	1	1	1	1	403	46.1	10.18	Not Found	Not Found	Not Found	Not Found		6122	ENSG00000100316.15	RPL3	22	cell organization and biogenesis;metabolic process;response to stimulus;transport	cytoplasm;cytosol;nucleus;ribosome	protein binding;RNA binding;structural molecule activity	Pf00297	0.11	38	1
TRUE	High	Master Protein	P78371	T-complex protein 1 subunit beta OS=Homo sapiens GN=CCT2 PE=1 SV=4	0	3.84	7.85047	2	2	2	1	535	57.5	6.46	Not Found	Not Found	Not Found	Not Found		10576	ENSG00000166226.12	CCT2	12	cell organization and biogenesis;metabolic process;regulation of biological process;transport	cytoplasm;cytosol;extracellular;organelle lumen	nucleotide binding;protein binding	Pf00118	0.136	68	2
TRUE	High	Master Protein	P04264	Keratin, type II cytoskeletal 1 OS=Homo sapiens GN=KRT1 PE=1 SV=6	0	3.815	3.10559	2	7	1	1	644	66	8.12	Not Found	Not Found	Not Found	Not Found		3848	ENSG00000167768.4	KRT1	12	cell death;defense response;metabolic process;regulation of biological process;response to stimulus;transport	cytoskeleton;cytosol;extracellular;membrane;nucleus	catalytic activity;motor activity;protein binding;receptor activity;structural molecule activity	Pf00038, Pf01576, Pf05103, Pf05957, Pf12128, Pf13166, Pf13514	0.129	226	2
TRUE	High	Master Protein	E9PAV3	Nascent polypeptide-associated complex subunit alpha, muscle-specific form OS=Homo sapiens GN=NACA PE=1 SV=1	0	3.784	0.721848	1	1	1	1	2078	205.3	9.58	Not Found	Not Found	Not Found	Not Found		4666	ENSG00000196531.10	NACA	12	metabolic process;regulation of biological process	cytoplasm;nucleus	DNA binding	Pf01849	0.02	62	1
TRUE	High	Master Protein	P25787	Proteasome subunit alpha type-2 OS=Homo sapiens GN=PSMA2 PE=1 SV=2	0	3.652	8.97436	1	1	1	1	234	25.9	7.43	Not Found	Not Found	Not Found	Not Found		5683	ENSG00000256646.7; ENSG00000106588.10	PSMA2	7	metabolic process;regulation of biological process;response to stimulus;transport	cytoplasm;cytosol;extracellular;nucleus;organelle lumen;proteasome	catalytic activity;protein binding	Pf00227, Pf10584	0.194	27	1
TRUE	High	Master Protein	P08865	40S ribosomal protein SA OS=Homo sapiens GN=RPSA PE=1 SV=4	0	3.627	5.08475	1	1	1	1	295	32.8	4.87	Not Found	Not Found	Not Found	Not Found		3921	ENSG00000168028.13	RPSA	3	cell organization and biogenesis;metabolic process;transport	cytoplasm;cytosol;membrane;nucleus;ribosome	protein binding;receptor activity;RNA binding;structural molecule activity	Pf00318	0.166	76	1
TRUE	High	Master Protein	P35579	Myosin-9 OS=Homo sapiens GN=MYH9 PE=1 SV=4	0	3.598	1.53061	2	2	2	1	1960	226.4	5.6	Not Found	Not Found	Not Found	Not Found		4627	ENSG00000100345.20	MYH9	22	cell differentiation;cell organization and biogenesis;cellular component movement;metabolic process;regulation of biological process;response to stimulus;transport	cytoplasm;cytoskeleton;cytosol;extracellular;membrane;nucleus	catalytic activity;motor activity;nucleotide binding;protein binding;RNA binding;transporter activity	Pf00063, Pf01442, Pf01496, Pf01576, Pf01765, Pf02736, Pf03962, Pf04111, Pf04156, Pf05911, Pf06637, Pf07888, Pf09731, Pf11068, Pf11559, Pf12128, Pf13094	0.036	47	2
TRUE	High	Master Protein	P09211	Glutathione S-transferase P OS=Homo sapiens GN=GSTP1 PE=1 SV=2	0	3.54	16.1905	2	2	2	1	210	23.3	5.64	Not Found	Not Found	Not Found	Not Found		2950	ENSG00000084207.15	GSTP1	11	cell communication;cell proliferation;metabolic process;regulation of biological process;response to stimulus;transport	cytoplasm;cytosol;extracellular;membrane;mitochondrion;nucleus;organelle lumen	antioxidant activity;catalytic activity;enzyme regulator activity;protein binding	Pf00043, Pf02798, Pf14497	0.468	50	2
TRUE	High	Master Protein	P19827	Inter-alpha-trypsin inhibitor heavy chain H1 OS=Homo sapiens GN=ITIH1 PE=1 SV=3	0	3.515	2.30516	1	1	1	1	911	101.3	6.79	Not Found	Not Found	Not Found	Not Found		3697	ENSG00000055957.10	ITIH1	3	metabolic process;regulation of biological process	extracellular	enzyme regulator activity;metal ion binding	Pf00092, Pf06668, Pf08487, Pf10138, Pf11775, Pf13519, Pf13768	0.061	55	1
TRUE	High	Master Protein	P50990	T-complex protein 1 subunit theta OS=Homo sapiens GN=CCT8 PE=1 SV=4	0	3.498	2.73723	1	1	1	1	548	59.6	5.6	Not Found	Not Found	Not Found	Not Found		10694	ENSG00000156261.12	CCT8	21	cell organization and biogenesis;metabolic process;regulation of biological process;transport	cytoplasm;cytoskeleton;cytosol;extracellular;organelle lumen	catalytic activity;nucleotide binding;protein binding	Pf00118	0.058	81	1
TRUE	High	Master Protein	P06744	Glucose-6-phosphate isomerase OS=Homo sapiens GN=GPI PE=1 SV=4	0	3.343	4.6595	1	1	1	1	558	63.1	8.32	Not Found	Not Found	Not Found	Not Found		2821	ENSG00000105220.14	GPI	19	metabolic process;regulation of biological process;response to stimulus;transport	cytoplasm;cytosol;extracellular;membrane;organelle lumen	catalytic activity;protein binding	Pf00342	0.066	30	1
TRUE	High	Master Protein	O43852	Calumenin OS=Homo sapiens GN=CALU PE=1 SV=2	0	3.324	7.61905	1	2	1	1	315	37.1	4.64	Not Found	Not Found	Not Found	Not Found		813	ENSG00000128595.16	CALU	7	metabolic process	endoplasmic reticulum;extracellular;Golgi;membrane;organelle lumen	metal ion binding;protein binding	Pf13499	0.145	86	1
TRUE	High	Master Protein	P35527	Keratin, type I cytoskeletal 9 OS=Homo sapiens GN=KRT9 PE=1 SV=3	0	3.286	2.56822	1	1	1	1	623	62	5.24	Not Found	Not Found	Not Found	Not Found		3857	ENSG00000171403.9	KRT9	17	cell death;cell organization and biogenesis	cytosol;membrane;nucleus	structural molecule activity	Pf00038, Pf13166	0.07	73	1
TRUE	High	Master Protein	P62979	Ubiquitin-40S ribosomal protein S27a OS=Homo sapiens GN=RPS27A PE=1 SV=2	0	3.286	16.0256	2	3	2	1	156	18	9.64	Not Found	Not Found	Not Found	Not Found		6233	ENSG00000143947.13	RPS27A	2	cell communication;cell organization and biogenesis;cellular homeostasis;defense response;metabolic process;regulation of biological process;response to stimulus;transport	cytoplasm;cytosol;membrane;nucleus;ribosome	metal ion binding;protein binding;RNA binding;structural molecule activity	Pf00240, Pf01599, Pf11976, Pf13019, Pf13881, Pf14560	0.52	42	2
TRUE	High	Master Protein	P30050	60S ribosomal protein L12 OS=Homo sapiens GN=RPL12 PE=1 SV=1	0	3.273	18.7879	2	3	2	1	165	17.8	9.42	Not Found	Not Found	Not Found	Not Found		6136	ENSG00000197958.12	RPL12	9	cell organization and biogenesis;metabolic process;transport	cytosol;membrane;ribosome	protein binding;RNA binding;structural molecule activity	Pf00298, Pf03946	0.52	42	2
TRUE	High	Master Protein	P07237	Protein disulfide-isomerase OS=Homo sapiens GN=P4HB PE=1 SV=3	0	3.169	3.14961	1	1	1	1	508	57.1	4.87	Not Found	Not Found	Not Found	Not Found		5034	ENSG00000185624.14	P4HB	17	cell organization and biogenesis;cellular homeostasis;metabolic process;regulation of biological process;response to stimulus	endoplasmic reticulum;extracellular;membrane;organelle lumen	catalytic activity;metal ion binding;protein binding;RNA binding	Pf00085, Pf01216, Pf13098, Pf13848, Pf13899, Pf13905	0.059	41	1
TRUE	High	Master Protein	P19823	Inter-alpha-trypsin inhibitor heavy chain H2 OS=Homo sapiens GN=ITIH2 PE=1 SV=2	0	3.152	2.95983	1	1	1	1	946	106.4	6.86	Not Found	Not Found	Not Found	Not Found		3698	ENSG00000151655.18	ITIH2	10	metabolic process;regulation of biological process	extracellular;organelle lumen	enzyme regulator activity	Pf00092, Pf06668, Pf08487, Pf13519, Pf13768	0.041	35	1
TRUE	High	Master Protein	P58107	Epiplakin OS=Homo sapiens GN=EPPK1 PE=1 SV=2	0	3.13	1.8664	1	1	1	1	5090	555.3	5.6	Not Found	Not Found	Not Found	Not Found		83481		EPPK1	8	cell organization and biogenesis;regulation of biological process;response to stimulus	cytoplasm;cytoskeleton;membrane	protein binding;RNA binding	Pf00681	0.007	61	1
TRUE	High	Master Protein	P30048	Thioredoxin-dependent peroxide reductase, mitochondrial OS=Homo sapiens GN=PRDX3 PE=1 SV=3	0	3.128	5.46875	1	1	1	1	256	27.7	7.78	Not Found	Not Found	Not Found	Not Found		10935	ENSG00000165672.6	PRDX3	10	cell death;cell differentiation;cell organization and biogenesis;cellular homeostasis;metabolic process;regulation of biological process;response to stimulus	cytoplasm;cytosol;endosome;mitochondrion;organelle lumen	antioxidant activity;catalytic activity;enzyme regulator activity;protein binding	Pf00578, Pf08534, Pf10417, Pf13905	0.179	45	1
TRUE	High	Master Protein	P04083	Annexin A1 OS=Homo sapiens GN=ANXA1 PE=1 SV=2	0	3.062	9.53757	2	2	2	1	346	38.7	7.02	Not Found	Not Found	Not Found	Not Found		301	ENSG00000135046.13	ANXA1	9	cell differentiation;cell organization and biogenesis;cellular component movement;defense response;metabolic process;regulation of biological process;response to stimulus;transport	cell surface;cytoplasm;cytoskeleton;cytosol;endosome;extracellular;membrane;nucleus;vacuole	catalytic activity;DNA binding;enzyme regulator activity;metal ion binding;protein binding;RNA binding;structural molecule activity	Pf00191	0.245	36	2
TRUE	High	Master Protein	P63241	Eukaryotic translation initiation factor 5A-1 OS=Homo sapiens GN=EIF5A PE=1 SV=2	0	2.886	7.79221	1	4	1	1	154	16.8	5.24	Not Found	Not Found	Not Found	Not Found		1984	ENSG00000132507.17	EIF5A	17	cell death;cellular homeostasis;metabolic process;regulation of biological process;response to stimulus;transport	cytoplasm;cytosol;endoplasmic reticulum;membrane;nucleus	protein binding;RNA binding	Pf01287	0.778	101	1
TRUE	High	Master Protein	Q02790	Peptidyl-prolyl cis-trans isomerase FKBP4 OS=Homo sapiens GN=FKBP4 PE=1 SV=3	0	2.879	6.75381	2	2	2	1	459	51.8	5.43	Not Found	Not Found	Not Found	Not Found		2288	ENSG00000004478.7	FKBP4	12	cell organization and biogenesis;metabolic process;regulation of biological process;response to stimulus;transport	cytoplasm;cytoskeleton;cytosol;mitochondrion;nucleus	catalytic activity;nucleotide binding;protein binding;RNA binding	Pf00254, Pf00515, Pf07719, Pf13174, Pf13371, Pf13414, Pf13424, Pf13432, Pf14559	0.16	25	2
TRUE	High	Master Protein	P13645	Keratin, type I cytoskeletal 10 OS=Homo sapiens GN=KRT10 PE=1 SV=6	0	2.851	2.39726	1	1	1	1	584	58.8	5.21	Not Found	Not Found	Not Found	Not Found		3858	ENSG00000186395.7	KRT10	17	cell death;cell differentiation;metabolic process	cytoplasm;cytoskeleton;cytosol;membrane;nucleus	structural molecule activity	Pf00038, Pf04111	0.086	63	1
TRUE	High	Master Protein	Q16658	Fascin OS=Homo sapiens GN=FSCN1 PE=1 SV=3	0	2.842	4.86815	1	1	1	1	493	54.5	7.24	Not Found	Not Found	Not Found	Not Found		6624	ENSG00000075618.17	FSCN1	7	cell organization and biogenesis;cell proliferation;cellular component movement;regulation of biological process	cytoplasm;cytoskeleton;cytosol	protein binding;RNA binding	Pf06268	0.083	47	1
TRUE	High	Master Protein	P07358	Complement component C8 beta chain OS=Homo sapiens GN=C8B PE=1 SV=3	0	2.805	3.04569	1	1	1	1	591	67	8.13	Not Found	Not Found	Not Found	Not Found		732		C8B	1	defense response;metabolic process;regulation of biological process;response to stimulus	extracellular;membrane	protein binding	Pf00057, Pf01823	0.077	27	1
TRUE	High	Master Protein	P22087	rRNA 2'-O-methyltransferase fibrillarin OS=Homo sapiens GN=FBL PE=1 SV=2	0	2.654	10.2804	1	1	1	1	321	33.8	10.18	Not Found	Not Found	Not Found	Not Found		2091	ENSG00000280548.3; ENSG00000105202.8	FBL	19; CHR_HG2021_PATCH	cell differentiation;cell organization and biogenesis;metabolic process	chromosome;membrane;nucleus	catalytic activity;protein binding;RNA binding	Pf01135, Pf01269, Pf13847	0.105	28	1
TRUE	High	Master Protein	P05388	60S acidic ribosomal protein P0 OS=Homo sapiens GN=RPLP0 PE=1 SV=1	0	2.614	4.10095	1	2	1	1	317	34.3	5.97	Not Found	Not Found	Not Found	Not Found		6175	ENSG00000089157.15	RPLP0	12	cell organization and biogenesis;metabolic process;regulation of biological process;response to stimulus;transport	cytoplasm;cytosol;endoplasmic reticulum;membrane;nucleus;ribosome	protein binding;RNA binding;structural molecule activity	Pf00428, Pf00466	0.129	57	1
TRUE	High	Master Protein	P40926	Malate dehydrogenase, mitochondrial OS=Homo sapiens GN=MDH2 PE=1 SV=3	0	2.61	4.73373	1	1	1	1	338	35.5	8.68	Not Found	Not Found	Not Found	Not Found		4191	ENSG00000146701.11	MDH2	7	metabolic process	membrane;mitochondrion;nucleus;organelle lumen	catalytic activity;nucleotide binding;protein binding;RNA binding	Pf00056, Pf01073, Pf01118, Pf02866, Pf13460	0.096	38	1
TRUE	High	Master Protein	P00738	Haptoglobin OS=Homo sapiens GN=HP PE=1 SV=1	0	2.604	2.95567	1	6	1	1	406	45.2	6.58	Not Found	Not Found	Not Found	Not Found		3240	ENSG00000257017.8	HP	16	defense response;metabolic process;regulation of biological process;response to stimulus;transport	extracellular;organelle lumen	antioxidant activity;catalytic activity;protein binding	Pf00089	0.105	93	1
TRUE	High	Master Protein	P34932	Heat shock 70 kDa protein 4 OS=Homo sapiens GN=HSPA4 PE=1 SV=4	0	2.594	1.66667	1	1	1	1	840	94.3	5.19	Not Found	Not Found	Not Found	Not Found		3308	ENSG00000170606.14	HSPA4	5	cell organization and biogenesis;response to stimulus;transport	cytoplasm;cytosol	nucleotide binding;protein binding	Pf00012, Pf06723	0.04	45	1
TRUE	High	Master Protein	P52209	6-phosphogluconate dehydrogenase, decarboxylating OS=Homo sapiens GN=PGD PE=1 SV=3	0	2.587	3.51967	1	1	1	1	483	53.1	7.23	Not Found	Not Found	Not Found	Not Found		5226	ENSG00000142657.20	PGD	1	metabolic process	cytoplasm;cytosol;nucleus	catalytic activity	Pf00393, Pf03446	0.08	25	1
TRUE	High	Master Protein	P05141	ADP/ATP translocase 2 OS=Homo sapiens GN=SLC25A5 PE=1 SV=7	0	2.461	7.04698	2	2	2	1	298	32.8	9.69	Not Found	Not Found	Not Found	Not Found		292	ENSG00000005022.5	SLC25A5	X	regulation of biological process;transport	membrane;mitochondrion;nucleus	protein binding;RNA binding;transporter activity	Pf00153	0.245	64	2
TRUE	High	Master Protein	P22314	Ubiquitin-like modifier-activating enzyme 1 OS=Homo sapiens GN=UBA1 PE=1 SV=3	0	2.437	1.79584	1	1	1	1	1058	117.8	5.76	Not Found	Not Found	Not Found	Not Found		7317	ENSG00000130985.16	UBA1	X	metabolic process;response to stimulus	cytoplasm;cytosol;membrane;mitochondrion;nucleus	catalytic activity;nucleotide binding;protein binding;RNA binding	Pf00899, Pf02134, Pf09358, Pf10585	0.039	38	1
TRUE	High	Master Protein	Q07020	60S ribosomal protein L18 OS=Homo sapiens GN=RPL18 PE=1 SV=2	0	2.404	6.91489	1	3	1	1	188	21.6	11.72	Not Found	Not Found	Not Found	Not Found		6141	ENSG00000063177.12	RPL18	19	cell organization and biogenesis;metabolic process;transport	cytoplasm;cytosol;endoplasmic reticulum;membrane;nucleus;ribosome	RNA binding;structural molecule activity	Pf00828	0.292	55	1
TRUE	High	Master Protein	P02774	Vitamin D-binding protein OS=Homo sapiens GN=GC PE=1 SV=1	0	2.31	9.70464	2	2	2	1	474	52.9	5.54	Not Found	Not Found	Not Found	Not Found		2638		GC	4	metabolic process;transport	cytosol;extracellular;organelle lumen	protein binding;transporter activity	Pf15024	0.172	20	2
TRUE	High	Master Protein	P23396	40S ribosomal protein S3 OS=Homo sapiens GN=RPS3 PE=1 SV=2	0	2.288	5.34979	1	1	1	1	243	26.7	9.66	Not Found	Not Found	Not Found	Not Found		6188	ENSG00000149273.14	RPS3	11	cell death;cell division;cell organization and biogenesis;metabolic process;regulation of biological process;response to stimulus;transport	cytoplasm;cytoskeleton;cytosol;endoplasmic reticulum;membrane;mitochondrion;nucleus;organelle lumen;ribosome	catalytic activity;DNA binding;protein binding;RNA binding;structural molecule activity	Pf00189, Pf07650	0.129	50	1
TRUE	High	Master Protein	P80723	Brain acid soluble protein 1 OS=Homo sapiens GN=BASP1 PE=1 SV=2	0	2.276	12.7753	1	1	1	1	227	22.7	4.63	Not Found	Not Found	Not Found	Not Found		10409	ENSG00000176788.8	BASP1	5	cell differentiation;cell organization and biogenesis;regulation of biological process	cytoplasm;cytoskeleton;membrane;nucleus	DNA binding;protein binding		0.194	26	1
TRUE	High	Master Protein	Q8TEX9	Importin-4 OS=Homo sapiens GN=IPO4 PE=1 SV=2	0	2.236	2.22017	1	1	1	1	1081	118.6	4.96	Not Found	Not Found	Not Found	Not Found		79711	ENSG00000196497.16	IPO4	14	cell organization and biogenesis;transport	cytoplasm;membrane;nucleus	protein binding;transporter activity	Pf01602, Pf13513, Pf13646	0.041	34	1
TRUE	High	Master Protein	P25705	ATP synthase subunit alpha, mitochondrial OS=Homo sapiens GN=ATP5A1 PE=1 SV=1	0	2.151	2.71248	1	2	1	1	553	59.7	9.13	Not Found	Not Found	Not Found	Not Found		498	ENSG00000152234.15	ATP5A1	18	cell organization and biogenesis;metabolic process;regulation of biological process;transport	membrane;mitochondrion;organelle lumen	catalytic activity;nucleotide binding;protein binding;RNA binding;transporter activity	Pf00006, Pf00306, Pf02663, Pf02874, Pf05943	0.064	30	1
TRUE	High	Master Protein	P28066	Proteasome subunit alpha type-5 OS=Homo sapiens GN=PSMA5 PE=1 SV=3	0	2.136	4.97925	1	1	1	1	241	26.4	4.79	Not Found	Not Found	Not Found	Not Found		5686	ENSG00000143106.12	PSMA5	1	metabolic process;regulation of biological process;response to stimulus;transport	cytoplasm;cytosol;extracellular;nucleus;organelle lumen;proteasome	catalytic activity;nucleotide binding;protein binding	Pf00227, Pf10584	0.233	45	1
TRUE	High	Master Protein	P26373	60S ribosomal protein L13 OS=Homo sapiens GN=RPL13 PE=1 SV=4	0	2.132	5.21327	1	1	1	1	211	24.2	11.65	Not Found	Not Found	Not Found	Not Found		6137	ENSG00000167526.13	RPL13	16	cell organization and biogenesis;metabolic process;transport	cytosol;membrane;nucleus;ribosome	protein binding;RNA binding;structural molecule activity	Pf01294	0.179	51	1
TRUE	High	Master Protein	P46940	Ras GTPase-activating-like protein IQGAP1 OS=Homo sapiens GN=IQGAP1 PE=1 SV=1	0	2.058	0.78455	1	1	1	1	1657	189.1	6.48	Not Found	Not Found	Not Found	Not Found		8826	ENSG00000140575.12	IQGAP1	15	cell growth;regulation of biological process;response to stimulus;transport	cytoplasm;cytoskeleton;cytosol;membrane;nucleus	enzyme regulator activity;metal ion binding;protein binding	Pf00307, Pf00397, Pf00616, Pf03836, Pf11016	0.025	23	1
TRUE	High	Master Protein	P51991	Heterogeneous nuclear ribonucleoprotein A3 OS=Homo sapiens GN=HNRNPA3 PE=1 SV=2	0	2.039	4.2328	1	1	1	1	378	39.6	9.01	Not Found	Not Found	Not Found	Not Found		220988	ENSG00000170144.20	HNRNPA3	2	metabolic process;transport	cytoplasm;nucleus;spliceosomal complex	protein binding;RNA binding;transporter activity	Pf00076, Pf13893, Pf14259	0.122	36	1
TRUE	High	Master Protein	Q07021	Complement component 1 Q subcomponent-binding protein, mitochondrial OS=Homo sapiens GN=C1QBP PE=1 SV=1	0	2.023	4.60993	1	1	1	1	282	31.3	4.84	Not Found	Not Found	Not Found	Not Found		708	ENSG00000108561.8	C1QBP	17	cell death;cell organization and biogenesis;defense response;metabolic process;regulation of biological process;response to stimulus	cell surface;cytoplasm;cytosol;extracellular;membrane;mitochondrion;nucleus;organelle lumen	protein binding;RNA binding	Pf02330	0.166	23	1
TRUE	High	Master Protein	P26641	Elongation factor 1-gamma OS=Homo sapiens GN=EEF1G PE=1 SV=3	0	1.859	3.20366	1	1	1	1	437	50.1	6.67	Not Found	Not Found	Not Found	Not Found		1937	ENSG00000254772.9	EEF1G	11	metabolic process;response to stimulus	cytoplasm;cytosol;endoplasmic reticulum;membrane;nucleus	catalytic activity;protein binding;RNA binding	Pf00043, Pf00647, Pf02798, Pf13409, Pf13410, Pf13417, Pf14497	0.086	22	1
TRUE	High	Master Protein	P21291	Cysteine and glycine-rich protein 1 OS=Homo sapiens GN=CSRP1 PE=1 SV=3	0	1.855	8.80829	1	1	1	1	193	20.6	8.57	Not Found	Not Found	Not Found	Not Found		1465	ENSG00000159176.13	CSRP1	1		nucleus	metal ion binding;RNA binding	Pf00412	0.179	34	1
TRUE	High	Master Protein	P08708	40S ribosomal protein S17 OS=Homo sapiens GN=RPS17 PE=1 SV=2	0	1.696	16.2963	1	2	1	1	135	15.5	9.85	Not Found	Not Found	Not Found	Not Found		6218	ENSG00000278229.2; ENSG00000182774.10	RPS17; RPS17L	15; CHR_HSCHR15_5_CTG8	cell organization and biogenesis;metabolic process;transport	cytosol;membrane;ribosome	RNA binding;structural molecule activity	Pf00833	0.468	48	1
TRUE	High	Master Protein	P53992	Protein transport protein Sec24C OS=Homo sapiens GN=SEC24C PE=1 SV=3	0	1.629	1.37112	1	1	1	1	1094	118.2	7.06	Not Found	Not Found	Not Found	Not Found		9632	ENSG00000176986.15	SEC24C	10	cell organization and biogenesis;regulation of biological process;transport	cytoplasm;cytosol;endoplasmic reticulum;membrane	metal ion binding;protein binding	Pf00626, Pf03154, Pf04503, Pf04652, Pf04810, Pf04811, Pf04815, Pf07223, Pf08033, Pf09606, Pf09770, Pf15449	0.049	24	1
TRUE	High	Master Protein	P08670	Vimentin OS=Homo sapiens GN=VIM PE=1 SV=4	0	1.598	4.07725	1	2	1	1	466	53.6	5.12	Not Found	Not Found	Not Found	Not Found		7431	ENSG00000026025.15	VIM	10	cell differentiation;cell organization and biogenesis;cellular component movement;metabolic process;regulation of biological process;response to stimulus	cytoplasm;cytoskeleton;cytosol;membrane	protein binding;RNA binding;structural molecule activity	Pf00038, Pf04111, Pf04156, Pf04732, Pf05622, Pf10186	0.07	39	1
TRUE	High	Master Protein	Q96C36	Pyrroline-5-carboxylate reductase 2 OS=Homo sapiens GN=PYCR2 PE=1 SV=1	0	1.528	4.0625	1	1	1	1	320	33.6	7.77	Not Found	Not Found	Not Found	Not Found		29920	ENSG00000143811.18	PYCR2	1	metabolic process;response to stimulus	cytoplasm;mitochondrion;organelle lumen	catalytic activity;nucleotide binding	Pf01210, Pf03807, Pf14748	0.166	27	1
TRUE	High	Master Protein	P46777	60S ribosomal protein L5 OS=Homo sapiens GN=RPL5 PE=1 SV=3	0	1.499	6.06061	1	1	1	1	297	34.3	9.72	Not Found	Not Found	Not Found	Not Found		6125	ENSG00000122406.12	RPL5	1	cell organization and biogenesis;metabolic process;regulation of biological process;transport	cytoplasm;cytosol;membrane;nucleus;ribosome	protein binding;RNA binding;structural molecule activity	Pf00861, Pf14204	0.136	34	1
TRUE	High	Master Protein	P52597	Heterogeneous nuclear ribonucleoprotein F OS=Homo sapiens GN=HNRNPF PE=1 SV=3	0	1.461	3.85542	1	1	1	1	415	45.6	5.58	Not Found	Not Found	Not Found	Not Found		3185	ENSG00000169813.16	HNRNPF	10	metabolic process;regulation of biological process;response to stimulus	cytosol;membrane;nucleus;spliceosomal complex	protein binding;RNA binding	Pf00076, Pf08080, Pf14259	0.105	24	1
TRUE	High	Master Protein	P00734	Prothrombin OS=Homo sapiens GN=F2 PE=1 SV=2	0	1.433	2.89389	1	1	1	1	622	70	5.9	Not Found	Not Found	Not Found	Not Found		2147	ENSG00000180210.14	F2	11	cellular component movement;cellular homeostasis;coagulation;defense response;development;metabolic process;regulation of biological process;response to stimulus;transport	extracellular;membrane;organelle lumen	catalytic activity;metal ion binding;protein binding;receptor activity;signal transducer activity	Pf00051, Pf00089, Pf00594, Pf09342, Pf09396	0.068	22	1
TRUE	High	Master Protein	P26599	Polypyrimidine tract-binding protein 1 OS=Homo sapiens GN=PTBP1 PE=1 SV=1	0	1.377	3.76648	1	1	1	1	531	57.2	9.17	Not Found	Not Found	Not Found	Not Found		5725	ENSG00000011304.19	PTBP1	19	metabolic process;regulation of biological process;response to stimulus	membrane;nucleus	protein binding;RNA binding	Pf00076, Pf13893, Pf14259	0.096	28	1
TRUE	High	Master Protein	Q15365	Poly(rC)-binding protein 1 OS=Homo sapiens GN=PCBP1 PE=1 SV=2	0	1.375	5.89888	1	1	1	1	356	37.5	7.09	Not Found	Not Found	Not Found	Not Found		5093	ENSG00000169564.6	PCBP1	2	metabolic process;regulation of biological process	cytoplasm;cytosol;membrane;nucleus	DNA binding;protein binding;RNA binding	Pf00013, Pf13014	0.116	24	1
TRUE	High	Master Protein	P19338	Nucleolin OS=Homo sapiens GN=NCL PE=1 SV=3	0	1.353	1.40845	1	1	1	1	710	76.6	4.7	Not Found	Not Found	Not Found	Not Found		4691	ENSG00000115053.15	NCL	2	regulation of biological process;response to stimulus	cytoplasm;membrane;nucleus	DNA binding;protein binding;RNA binding	Pf00076, Pf13893, Pf14259	0.049	44	1
TRUE	High	Master Protein	P00338	L-lactate dehydrogenase A chain OS=Homo sapiens GN=LDHA PE=1 SV=2	0	1.339	3.31325	1	1	1	1	332	36.7	8.27	Not Found	Not Found	Not Found	Not Found		3939	ENSG00000134333.13	LDHA	11	metabolic process;regulation of biological process;response to stimulus	cytoplasm;cytosol;membrane;nucleus	catalytic activity;nucleotide binding;protein binding	Pf00056, Pf02866	0.096	46	1
TRUE	High	Master Protein	Q8TAX0	Protein odd-skipped-related 1 OS=Homo sapiens GN=OSR1 PE=2 SV=1	0	1.305	4.51128	1	1	1	1	266	29.6	9.73	Not Found	Not Found	Not Found	Not Found		130497	ENSG00000143867.6	OSR1	2	cell differentiation;cell proliferation;metabolic process;regulation of biological process;response to stimulus	cytosol;nucleus	catalytic activity;metal ion binding;protein binding	Pf00096, Pf13465	0.259	30	1
TRUE	High	Master Protein	P13639	Elongation factor 2 OS=Homo sapiens GN=EEF2 PE=1 SV=4	0	1.274	1.8648	1	1	1	1	858	95.3	6.83	Not Found	Not Found	Not Found	Not Found		1938	ENSG00000167658.15	EEF2	19	cell differentiation;cell proliferation;metabolic process;regulation of biological process;response to stimulus;transport	cytoplasm;cytosol;extracellular;membrane;nucleus;organelle lumen;ribosome	catalytic activity;nucleotide binding;protein binding;RNA binding	Pf00009, Pf00679, Pf03144, Pf03764, Pf14492	0.044	22	1
TRUE	High	Master Protein	O43390	Heterogeneous nuclear ribonucleoprotein R OS=Homo sapiens GN=HNRNPR PE=1 SV=1	0	1.23	1.89573	1	1	1	1	633	70.9	8.13	Not Found	Not Found	Not Found	Not Found		10236	ENSG00000282958.1; ENSG00000125944.18	HNRNPR	1; CHR_HSCHR1_4_CTG3	metabolic process;regulation of biological process	cytoplasm;endoplasmic reticulum;nucleus;spliceosomal complex	protein binding;RNA binding	Pf00076, Pf13893, Pf14259	0.058	23	1
TRUE	High	Master Protein	O75340	Programmed cell death protein 6 OS=Homo sapiens GN=PDCD6 PE=1 SV=1	0	1.224	6.80628	1	1	1	1	191	21.9	5.4	Not Found	Not Found	Not Found	Not Found		10016	ENSG00000249915.7	PDCD6	5	cell death;cell organization and biogenesis;metabolic process;regulation of biological process;response to stimulus;transport	cytoplasm;endoplasmic reticulum;endosome;membrane;nucleus	catalytic activity;metal ion binding;protein binding	Pf00036, Pf13405, Pf13499, Pf13833	0.233	27	1
TRUE	High	Master Protein	A0A0C4DH25	Immunoglobulin kappa variable 3D-20 OS=Homo sapiens GN=IGKV3D-20 PE=3 SV=1	0	1.12	13.7931	1	1	1	1	116	12.5	4.59	Not Found	Not Found	Not Found	Not Found		28874	ENSG00000211625.2	IGKV3D-20	2	cellular component movement;metabolic process;regulation of biological process;response to stimulus;transport	extracellular;membrane	catalytic activity	Pf00047, Pf07686	0.468	28	1
TRUE	High	Master Protein	P10599	Thioredoxin OS=Homo sapiens GN=TXN PE=1 SV=3	0	1.108	10.4762	1	1	1	1	105	11.7	4.92	Not Found	Not Found	Not Found	Not Found		7295	ENSG00000136810.12	TXN	9	cell communication;cell proliferation;cellular component movement;cellular homeostasis;metabolic process;regulation of biological process;response to stimulus;transport	cytoplasm;cytosol;extracellular;mitochondrion;nucleus	antioxidant activity;catalytic activity;protein binding;RNA binding	Pf00085, Pf00462, Pf13098, Pf13899, Pf13905	0.389	29	1
TRUE	High	Master Protein	P26196	Probable ATP-dependent RNA helicase DDX6 OS=Homo sapiens GN=DDX6 PE=1 SV=2	0	1.065	2.27743	1	1	1	1	483	54.4	8.66	Not Found	Not Found	Not Found	Not Found		1656	ENSG00000110367.11	DDX6	11	cell organization and biogenesis;metabolic process;regulation of biological process	cytoplasm;cytosol;membrane;mitochondrion;nucleus	catalytic activity;nucleotide binding;protein binding;RNA binding	Pf00270, Pf00271, Pf14617	0.083	24	1
TRUE	High	Master Protein	O14684	Prostaglandin E synthase OS=Homo sapiens GN=PTGES PE=1 SV=2	0.009	0.932	5.26316	1	1	1	1	152	17.1	9.5	Not Found	Not Found	Not Found	Not Found		9536	ENSG00000148344.10	PTGES	9	defense response;metabolic process;regulation of biological process;response to stimulus	cytoplasm;membrane	catalytic activity		0.334	29	1
TRUE	High	Master Protein	O43293	Death-associated protein kinase 3 OS=Homo sapiens GN=DAPK3 PE=1 SV=1	0.009	0.809	2.86344	1	1	1	1	454	52.5	6.89	Not Found	Not Found	Not Found	Not Found		1613	ENSG00000167657.13	DAPK3	19	cell death;cell differentiation;cell organization and biogenesis;metabolic process;regulation of biological process;response to stimulus	cytoplasm;membrane;nucleus	catalytic activity;nucleotide binding;protein binding	Pf00069, Pf07714	0.101	26	1
