# Supplementary material for: Probing the Immunoreceptor Tyrosine-Based Inhibition Motif Interaction Protein Partners with Proteomics
Source: Molecules. 2024 Apr 25;29(9):1977. doi: 10.3390/molecules29091977 (PMC11085718; doi:10.3390/molecules29091977)
Supplement: Supplementary file 1 [file molecules-29-01977-s001.zip › Table S2-PZR-C.xlsx]

## Sheet: Proteins
Checked	Protein FDR Confidence	Master	Accession	Description	Exp. q-value	Sum PEP Score	Coverage	# Peptides	# PSMs	# Unique Peptides	# Protein Groups	# AAs	MW [kDa]	calc. pI	Found in Sample: [S2] F2: Light, Control, 1	Found in Sample: [S4] F2: Medium, Sample, 2	Modifications	Entrez Gene ID	Ensembl Gene ID	Gene ID	Chromosome	Biological Process	Cellular Component	Molecular Function	Pfam IDs	emPAI	Score Mascot	# Peptides Mascot
TRUE	High	Master Protein	P02768	Serum albumin OS=Homo sapiens GN=ALB PE=1 SV=2	0	161.422	61.9048	33	700	33	1	609	69.3	6.28	Not Found	Not Found		213	ENSG00000163631.16	ALB	4	cell communication;cell organization and biogenesis;metabolic process;regulation of biological process;response to stimulus;transport	cytoplasm;endoplasmic reticulum;extracellular;Golgi;nucleus;organelle lumen	antioxidant activity;catalytic activity;DNA binding;metal ion binding;protein binding	Pf00273	17.277	20216	33
TRUE	High	Master Protein	P01857	Immunoglobulin heavy constant gamma 1 OS=Homo sapiens GN=IGHG1 PE=1 SV=1	0	35.872	27.5758	8	55	5	1	330	36.1	8.19	Not Found	Not Found		3500	ENSG00000277633.5; ENSG00000211896.7	IGHG1	14; CHR_HSCHR14_3_CTG1	cell organization and biogenesis;cellular component movement;defense response;metabolic process;regulation of biological process;response to stimulus;transport	extracellular;membrane	catalytic activity;metal ion binding;protein binding	Pf07654, Pf08205	4.412	1490	8
TRUE	High	Master Protein	P02787	Serotransferrin OS=Homo sapiens GN=TF PE=1 SV=3	0	32.97	12.6074	5	25	5	1	698	77	7.12	Not Found	Not Found		7018	ENSG00000091513.14	TF	3	cell organization and biogenesis;cellular homeostasis;metabolic process;regulation of biological process;response to stimulus;transport	cell surface;endosome;extracellular;membrane;organelle lumen	enzyme regulator activity;metal ion binding;protein binding;transporter activity	Pf00405, Pf12974	0.945	544	5
TRUE	High	Master Protein	P01859	Immunoglobulin heavy constant gamma 2 OS=Homo sapiens GN=IGHG2 PE=1 SV=2	0	28.127	24.5399	5	48	2	1	326	35.9	7.59	Not Found	Not Found		3501	ENSG00000211893.3; ENSG00000274497.2	IGHG2	14; CHR_HSCHR14_3_CTG1	cell organization and biogenesis;defense response;metabolic process;regulation of biological process;response to stimulus	extracellular;membrane	catalytic activity;protein binding	Pf07654, Pf08205	0.931	1357	5
TRUE	High	Master Protein	P04406	Glyceraldehyde-3-phosphate dehydrogenase OS=Homo sapiens GN=GAPDH PE=1 SV=3	0	27.902	28.9552	4	17	4	1	335	36	8.46	Not Found	Not Found		2597	ENSG00000111640.14	GAPDH	12	cell death;cell organization and biogenesis;defense response;metabolic process;regulation of biological process;response to stimulus	cytoplasm;cytoskeleton;cytosol;membrane;nucleus	catalytic activity;enzyme regulator activity;nucleotide binding;protein binding	Pf00044, Pf02800	1.404	323	4
TRUE	High	Master Protein	P01009	Alpha-1-antitrypsin OS=Homo sapiens GN=SERPINA1 PE=1 SV=3	0	23.1	16.5072	5	45	5	1	418	46.7	5.59	Not Found	Not Found		5265	ENSG00000197249.13	SERPINA1	14	cell organization and biogenesis;coagulation;defense response;metabolic process;regulation of biological process;response to stimulus;transport	endoplasmic reticulum;extracellular;Golgi;membrane;organelle lumen	enzyme regulator activity;protein binding	Pf00079	0.817	920	5
TRUE	High	Master Protein	P01024	Complement C3 OS=Homo sapiens GN=C3 PE=1 SV=2	0	21.729	10.2225	10	24	10	1	1663	187	6.4	Not Found	Not Found		718	ENSG00000125730.16	C3	19	cell organization and biogenesis;defense response;metabolic process;regulation of biological process;response to stimulus;transport	extracellular;membrane;organelle lumen	catalytic activity;enzyme regulator activity;protein binding	Pf00207, Pf01759, Pf01821, Pf01835, Pf07677, Pf07678, Pf07703, Pf10569, Pf11974	0.262	356	10
TRUE	High	Master Protein	P60709	Actin, cytoplasmic 1 OS=Homo sapiens GN=ACTB PE=1 SV=1	0	21.624	11.7333	2	16	2	1	375	41.7	5.48	Not Found	Not Found		60	ENSG00000075624.13	ACTB	7	cell organization and biogenesis;cellular component movement;metabolic process;regulation of biological process;response to stimulus	cytoplasm;cytoskeleton;cytosol;membrane;nucleus	DNA binding;nucleotide binding;protein binding;structural molecule activity	Pf00022	1.015	388	2
TRUE	High	Master Protein	P02766	Transthyretin OS=Homo sapiens GN=TTR PE=1 SV=1	0	21.324	34.6939	2	63	2	1	147	15.9	5.76	Not Found	Not Found		7276	ENSG00000118271.9	TTR	18	cell organization and biogenesis;metabolic process;regulation of biological process;transport	cytoplasm;extracellular;organelle lumen	protein binding	Pf00576	1.783	412	2
TRUE	High	Master Protein	P01023	Alpha-2-macroglobulin OS=Homo sapiens GN=A2M PE=1 SV=3	0	18.939	10.2442	7	36	7	1	1474	163.2	6.46	Not Found	Not Found		2	ENSG00000175899.14	A2M	12	cell differentiation;cell organization and biogenesis;metabolic process;regulation of biological process;response to stimulus;transport	cytosol;extracellular;organelle lumen	enzyme regulator activity;protein binding	Pf00207, Pf01835, Pf07677, Pf07678, Pf07703, Pf10569, Pf11974, Pf13249	0.288	378	7
TRUE	High	Master Protein	P10809	60 kDa heat shock protein, mitochondrial OS=Homo sapiens GN=HSPD1 PE=1 SV=2	0	18.336	15.0087	4	11	4	1	573	61	5.87	Not Found	Not Found		3329	ENSG00000144381.16	HSPD1	2	cell organization and biogenesis;cell proliferation;metabolic process;regulation of biological process;response to stimulus;transport	cell surface;cytoplasm;cytosol;endosome;membrane;mitochondrion;organelle lumen	catalytic activity;DNA binding;nucleotide binding;protein binding;RNA binding	Pf00118	0.565	284	4
TRUE	High	Master Protein	P06733	Alpha-enolase OS=Homo sapiens GN=ENO1 PE=1 SV=2	0	18.287	14.977	4	20	4	1	434	47.1	7.39	Not Found	Not Found		2023	ENSG00000074800.13	ENO1	1	metabolic process;regulation of biological process;response to stimulus	cell surface;cytoplasm;cytosol;membrane;nucleus	catalytic activity;DNA binding;metal ion binding;protein binding;RNA binding	Pf00113, Pf03952, Pf13378	0.743	605	4
TRUE	High	Master Protein	P29401	Transketolase OS=Homo sapiens GN=TKT PE=1 SV=3	0	15.231	6.09952	2	3	2	1	623	67.8	7.66	Not Found	Not Found		7086	ENSG00000163931.15	TKT	3	metabolic process;regulation of biological process	cytosol	catalytic activity;metal ion binding;protein binding	Pf00456, Pf00676, Pf02775, Pf02779, Pf02780, Pf09364	0.212	152	2
TRUE	High	Master Protein	P04114	Apolipoprotein B-100 OS=Homo sapiens GN=APOB PE=1 SV=2	0	15.023	2.45453	6	7	6	1	4563	515.3	7.05	Not Found	Not Found		338		APOB	2	cell organization and biogenesis;cellular component movement;metabolic process;regulation of biological process;response to stimulus;transport	cytoplasm;cytosol;endoplasmic reticulum;endosome;extracellular;membrane;organelle lumen	protein binding;transporter activity	Pf01347, Pf04286, Pf06448, Pf09172, Pf12491	0.047	110	6
TRUE	High	Master Protein	P02753	Retinol-binding protein 4 OS=Homo sapiens GN=RBP4 PE=1 SV=3	0	11.769	25.8706	2	5	2	1	201	23	6.07	Not Found	Not Found		5950	ENSG00000138207.13	RBP4	10	metabolic process;regulation of biological process;response to stimulus;transport	cytosol;extracellular	protein binding;transporter activity	Pf00061, Pf08212	0.995	140	2
TRUE	High	Master Protein	P02745	Complement C1q subcomponent subunit A OS=Homo sapiens GN=C1QA PE=1 SV=2	0	11.479	11.0204	1	2	1	1	245	26	9.11	Not Found	Not Found		712	ENSG00000173372.16	C1QA	1	cell communication;defense response;metabolic process;regulation of biological process;response to stimulus	extracellular;membrane	catalytic activity;protein binding	Pf00229, Pf00386, Pf01391	0.359	87	1
TRUE	High	Master Protein	P00450	Ceruloplasmin OS=Homo sapiens GN=CP PE=1 SV=1	0	10.349	3.56808	2	5	2	1	1065	122.1	5.72	Not Found	Not Found		1356		CP	3	cellular homeostasis;metabolic process;transport	extracellular;membrane;organelle lumen	catalytic activity;metal ion binding;protein binding	Pf00394, Pf07731, Pf07732	0.182	141	2
TRUE	High	Master Protein	P01861	Immunoglobulin heavy constant gamma 4 OS=Homo sapiens GN=IGHG4 PE=1 SV=1	0	9.999	24.4648	5	5	1	1	327	35.9	7.36	Not Found	Not Found		3503	ENSG00000211892.3; ENSG00000277016.2	IGHG4	14; CHR_HSCHR14_3_CTG1	cell organization and biogenesis;defense response;metabolic process;regulation of biological process;response to stimulus	extracellular;membrane	catalytic activity;protein binding	Pf07654, Pf08205	1.154	134	5
TRUE	High	Master Protein	P02790	Hemopexin OS=Homo sapiens GN=HPX PE=1 SV=2	0	9.77	19.0476	4	4	4	1	462	51.6	7.02	Not Found	Not Found		3263	ENSG00000110169.10	HPX	11	cellular homeostasis;metabolic process;regulation of biological process;transport	extracellular;organelle lumen	metal ion binding;protein binding;transporter activity	Pf00045	0.425	72	4
TRUE	High	Master Protein	P01011	Alpha-1-antichymotrypsin OS=Homo sapiens GN=SERPINA3 PE=1 SV=2	0	9.264	9.45626	2	5	2	1	423	47.6	5.52	Not Found	Not Found		12	ENSG00000196136.17	SERPINA3	14	defense response;regulation of biological process;response to stimulus;transport	extracellular;nucleus;organelle lumen	DNA binding;enzyme regulator activity;protein binding	Pf00079	0.334	194	2
TRUE	High	Master Protein	P68363	Tubulin alpha-1B chain OS=Homo sapiens GN=TUBA1B PE=1 SV=1	0	7.752	16.8514	4	7	4	1	451	50.1	5.06	Not Found	Not Found		10376	ENSG00000123416.15	TUBA1B	12	cell division;cell organization and biogenesis;response to stimulus;transport	cytoplasm;cytoskeleton;membrane	catalytic activity;nucleotide binding;protein binding;RNA binding;structural molecule activity	Pf00091, Pf03953	0.616	67	4
TRUE	High	Master Protein	P02647	Apolipoprotein A-I OS=Homo sapiens GN=APOA1 PE=1 SV=1	0	7.526	18.7266	4	5	4	1	267	30.8	5.76	Not Found	Not Found		335	ENSG00000118137.9	APOA1	11	cell organization and biogenesis;cell proliferation;cellular component movement;metabolic process;regulation of biological process;response to stimulus;transport	cell surface;cytosol;endosome;extracellular;membrane;nucleus;organelle lumen	enzyme regulator activity;protein binding;transporter activity	Pf01442	0.551	138	4
TRUE	High	Master Protein	P01871	Immunoglobulin heavy constant mu OS=Homo sapiens GN=IGHM PE=1 SV=4	0	7.321	7.06402	1	2	1	1	453	49.4	6.77	Not Found	Not Found		3507	ENSG00000282657.3; ENSG00000211899.9	IGHM	CHR_HSCHR14_3_CTG1; 14	cell organization and biogenesis;cellular component movement;defense response;metabolic process;regulation of biological process;response to stimulus	cell surface;extracellular;membrane	DNA binding;protein binding	Pf00047, Pf07654, Pf08205	0.083	62	1
TRUE	High	Master Protein	P69905	Hemoglobin subunit alpha OS=Homo sapiens GN=HBA1 PE=1 SV=2	0	6.623	40.8451	2	2	2	1	142	15.2	8.68	Not Found	Not Found		3040; 3039	ENSG00000206172.8; ENSG00000188536.12	HBA2; HBA1	16	cell organization and biogenesis;metabolic process;regulation of biological process;response to stimulus;transport	cytosol;extracellular;membrane;organelle lumen	antioxidant activity;catalytic activity;metal ion binding;protein binding;transporter activity	Pf00042	0.778	36	2
TRUE	High	Master Protein	P0C0L4	Complement C4-A OS=Homo sapiens GN=C4A PE=1 SV=2	0	6.445	1.20413	1	1	1	1	1744	192.7	7.08	Not Found	Not Found		720; 721	ENSG00000244731.7	C4A; C4B	6	defense response;metabolic process;regulation of biological process;response to stimulus	extracellular;membrane;organelle lumen	catalytic activity;enzyme regulator activity;protein binding	Pf00207, Pf01759, Pf01821, Pf01835, Pf07677, Pf07678, Pf07703, Pf10569, Pf11974, Pf13249	0.024	71	1
TRUE	High	Master Protein	P01834	Immunoglobulin kappa constant OS=Homo sapiens GN=IGKC PE=1 SV=2	0	6.093	34.5794	2	3	2	1	107	11.8	6.52	Not Found	Not Found		3514		IGKC	2	cell organization and biogenesis;cellular component movement;defense response;metabolic process;regulation of biological process;response to stimulus;transport	extracellular;membrane	catalytic activity;protein binding	Pf07654	2.981	102	2
TRUE	High	Master Protein	P14618	Pyruvate kinase PKM OS=Homo sapiens GN=PKM PE=1 SV=4	0	5.517	10.3578	3	6	3	1	531	57.9	7.84	Not Found	Not Found		5315	ENSG00000067225.17	PKM	15	cell death;cell organization and biogenesis;metabolic process;response to stimulus;transport	cytoplasm;cytosol;extracellular;mitochondrion;nucleus;organelle lumen	catalytic activity;metal ion binding;nucleotide binding;protein binding;RNA binding	Pf00224, Pf02887	0.283	40	3
TRUE	High	Master Protein	P35232	Prohibitin OS=Homo sapiens GN=PHB PE=1 SV=1	0	5.065	8.82353	1	1	1	1	272	29.8	5.76	Not Found	Not Found		5245	ENSG00000167085.11	PHB	17	cell differentiation;cell organization and biogenesis;metabolic process;regulation of biological process;response to stimulus;transport	cell surface;cytoplasm;endosome;membrane;mitochondrion;nucleus	DNA binding;protein binding	Pf01145	0.136	66	1
TRUE	High	Master Protein	P07437	Tubulin beta chain OS=Homo sapiens GN=TUBB PE=1 SV=2	0	4.959	14.8649	2	3	2	1	444	49.6	4.89	Not Found	Not Found		203068	ENSG00000232575.10; ENSG00000196230.12; ENSG00000227739.10; ENSG00000224156.10; ENSG00000235067.10; ENSG00000229684.10; ENSG00000183311.16; ENSG00000232421.10	TUBB	6; CHR_HSCHR6_MHC_MANN_CTG1; CHR_HSCHR6_MHC_COX_CTG1; CHR_HSCHR6_MHC_APD_CTG1; CHR_HSCHR6_MHC_DBB_CTG1; CHR_HSCHR6_MHC_MCF_CTG1; CHR_HSCHR6_MHC_QBL_CTG1; CHR_HSCHR6_MHC_SSTO_CTG1	cell division;cell organization and biogenesis;cellular component movement;defense response;regulation of biological process;response to stimulus;transport	cytoplasm;cytoskeleton;extracellular;membrane;nucleus;organelle lumen	catalytic activity;nucleotide binding;protein binding;structural molecule activity	Pf00091, Pf03953, Pf10644	0.222	67	2
TRUE	High	Master Protein	P02765	Alpha-2-HS-glycoprotein OS=Homo sapiens GN=AHSG PE=1 SV=1	0	4.9	6.53951	1	17	1	1	367	39.3	5.72	Not Found	Not Found		197		AHSG	3	defense response;metabolic process;regulation of biological process;response to stimulus;transport	extracellular;Golgi;organelle lumen	enzyme regulator activity	Pf00031	0.136	206	1
TRUE	High	Master Protein	P62805	Histone H4 OS=Homo sapiens GN=HIST1H4A PE=1 SV=2	0	4.275	17.4757	2	3	2	1	103	11.4	11.36	Not Found	Not Found		8359; 8361; 8360; 8363; 8365; 8364; 121504; 554313; 8367; 8294; 8366; 8370; 8362; 8368	ENSG00000197061.4; ENSG00000275126.1; ENSG00000273542.1; ENSG00000197238.4; ENSG00000197837.3; ENSG00000276966.2; ENSG00000158406.4; ENSG00000270882.2; ENSG00000274618.1; ENSG00000278637.1; ENSG00000277157.1; ENSG00000278705.1; ENSG00000270276.2; ENSG00000276180.1	HIST1H4A; HIST1H4F; HIST1H4D; HIST1H4J; HIST1H4H; HIST1H4C; HIST4H4; HIST2H4B; HIST1H4E; HIST1H4I; HIST1H4B; HIST2H4A; HIST1H4K; HIST1H4L	6; 12; 1	cell organization and biogenesis;metabolic process;regulation of biological process;response to stimulus	chromosome;extracellular;membrane;nucleus	DNA binding;protein binding;RNA binding	Pf00125, Pf02969, Pf15630	1.154	66	2
TRUE	High	Master Protein	Q05639	Elongation factor 1-alpha 2 OS=Homo sapiens GN=EEF1A2 PE=1 SV=1	0	4.115	5.83153	2	13	2	1	463	50.4	9.03	Not Found	Not Found		1917	ENSG00000101210.10	EEF1A2	20	metabolic process;regulation of biological process;response to stimulus	cytoplasm;nucleus	catalytic activity;nucleotide binding;protein binding;RNA binding	Pf00009, Pf03143, Pf03144	0.202	120	2
TRUE	High	Master Protein	P60174	Triosephosphate isomerase OS=Homo sapiens GN=TPI1 PE=1 SV=3	0	4.104	6.29371	1	1	1	1	286	30.8	5.92	Not Found	Not Found		7167	ENSG00000111669.14	TPI1	12	development;metabolic process	cytosol;nucleus	catalytic activity;protein binding	Pf00121	0.129	60	1
TRUE	High	Master Protein	O43852	Calumenin OS=Homo sapiens GN=CALU PE=1 SV=2	0	4.019	7.61905	1	1	1	1	315	37.1	4.64	Not Found	Not Found		813	ENSG00000128595.16	CALU	7	metabolic process	endoplasmic reticulum;extracellular;Golgi;membrane;organelle lumen	metal ion binding;protein binding	Pf13499	0.145	53	1
TRUE	High	Master Protein	Q04695	Keratin, type I cytoskeletal 17 OS=Homo sapiens GN=KRT17 PE=1 SV=2	0	3.878	7.17593	2	3	2	1	432	48.1	5.02	Not Found	Not Found		3872	ENSG00000128422.15	KRT17	17	cell death;cell organization and biogenesis;regulation of biological process;response to stimulus	cytoplasm;cytoskeleton;cytosol	protein binding;receptor activity;signal transducer activity;structural molecule activity	Pf00038, Pf07888	0.141	93	2
TRUE	High	Master Protein	P61604	10 kDa heat shock protein, mitochondrial OS=Homo sapiens GN=HSPE1 PE=1 SV=2	0	3.858	13.7255	1	1	1	1	102	10.9	8.92	Not Found	Not Found		3336	ENSG00000115541.10	HSPE1	2	cell differentiation;metabolic process;regulation of biological process;response to stimulus	cytoplasm;membrane;mitochondrion;organelle lumen	metal ion binding;nucleotide binding;protein binding;RNA binding	Pf00166	0.259	61	1
TRUE	High	Master Protein	P05787	Keratin, type II cytoskeletal 8 OS=Homo sapiens GN=KRT8 PE=1 SV=7	0	3.636	4.7619	2	5	2	1	483	53.7	5.59	Not Found	Not Found		3856	ENSG00000170421.12	KRT8	12	cell death;cell differentiation;cell organization and biogenesis;regulation of biological process;response to stimulus	cytoplasm;cytoskeleton;cytosol;membrane;nucleus	catalytic activity;motor activity;protein binding;structural molecule activity	Pf00038, Pf01576, Pf13166, Pf15003	0.145	136	2
TRUE	High	Master Protein	P04075	Fructose-bisphosphate aldolase A OS=Homo sapiens GN=ALDOA PE=1 SV=2	0	2.949	8.24176	1	2	1	1	364	39.4	8.09	Not Found	Not Found		226	ENSG00000149925.17	ALDOA	16	cell organization and biogenesis;cellular homeostasis;metabolic process;regulation of biological process;transport	cytoplasm;cytoskeleton;cytosol;extracellular;membrane;nucleus;organelle lumen	catalytic activity;protein binding;RNA binding	Pf00274	0.222	45	1
TRUE	High	Master Protein	P00738	Haptoglobin OS=Homo sapiens GN=HP PE=1 SV=1	0	2.849	2.95567	1	4	1	1	406	45.2	6.58	Not Found	Not Found		3240	ENSG00000257017.8	HP	16	defense response;metabolic process;regulation of biological process;response to stimulus;transport	extracellular;organelle lumen	antioxidant activity;catalytic activity;protein binding	Pf00089	0.105	71	1
TRUE	High	Master Protein	P19823	Inter-alpha-trypsin inhibitor heavy chain H2 OS=Homo sapiens GN=ITIH2 PE=1 SV=2	0	2.808	2.95983	1	1	1	1	946	106.4	6.86	Not Found	Not Found		3698	ENSG00000151655.18	ITIH2	10	metabolic process;regulation of biological process	extracellular;organelle lumen	enzyme regulator activity	Pf00092, Pf06668, Pf08487, Pf13519, Pf13768	0.041	35	1
TRUE	High	Master Protein	P19827	Inter-alpha-trypsin inhibitor heavy chain H1 OS=Homo sapiens GN=ITIH1 PE=1 SV=3	0	2.726	2.30516	1	1	1	1	911	101.3	6.79	Not Found	Not Found		3697	ENSG00000055957.10	ITIH1	3	metabolic process;regulation of biological process	extracellular	enzyme regulator activity;metal ion binding	Pf00092, Pf06668, Pf08487, Pf10138, Pf11775, Pf13519, Pf13768	0.061	55	1
TRUE	High	Master Protein	Q06830	Peroxiredoxin-1 OS=Homo sapiens GN=PRDX1 PE=1 SV=1	0	2.367	12.0603	1	2	1	1	199	22.1	8.13	Not Found	Not Found		5052	ENSG00000117450.13	PRDX1	1	cell proliferation;cellular homeostasis;defense response;metabolic process;regulation of biological process;response to stimulus	cytoplasm;cytosol;mitochondrion;nucleus	antioxidant activity;catalytic activity;protein binding;RNA binding	Pf00578, Pf08534, Pf10417	0.179	32	1
TRUE	High	Master Protein	P05388	60S acidic ribosomal protein P0 OS=Homo sapiens GN=RPLP0 PE=1 SV=1	0	2.199	4.10095	1	1	1	1	317	34.3	5.97	Not Found	Not Found		6175	ENSG00000089157.15	RPLP0	12	cell organization and biogenesis;metabolic process;regulation of biological process;response to stimulus;transport	cytoplasm;cytosol;endoplasmic reticulum;membrane;nucleus;ribosome	protein binding;RNA binding;structural molecule activity	Pf00428, Pf00466	0.129	31	1
TRUE	High	Master Protein	P09651	Heterogeneous nuclear ribonucleoprotein A1 OS=Homo sapiens GN=HNRNPA1 PE=1 SV=5	0	2.041	4.30108	1	2	1	1	372	38.7	9.13	Not Found	Not Found		3178	ENSG00000135486.17	HNRNPA1	12	cell communication;metabolic process;regulation of biological process;response to stimulus;transport	cytoplasm;membrane;nucleus;spliceosomal complex	DNA binding;protein binding;RNA binding	Pf00076, Pf13893, Pf14259	0.122	67	1
TRUE	High	Master Protein	P07358	Complement component C8 beta chain OS=Homo sapiens GN=C8B PE=1 SV=3	0	1.969	3.04569	1	1	1	1	591	67	8.13	Not Found	Not Found		732		C8B	1	defense response;metabolic process;regulation of biological process;response to stimulus	extracellular;membrane	protein binding	Pf00057, Pf01823	0.077	27	1
TRUE	High	Master Protein	P35579	Myosin-9 OS=Homo sapiens GN=MYH9 PE=1 SV=4	0	1.888	0.867347	1	1	1	1	1960	226.4	5.6	Not Found	Not Found		4627	ENSG00000100345.20	MYH9	22	cell differentiation;cell organization and biogenesis;cellular component movement;metabolic process;regulation of biological process;response to stimulus;transport	cytoplasm;cytoskeleton;cytosol;extracellular;membrane;nucleus	catalytic activity;motor activity;nucleotide binding;protein binding;RNA binding;transporter activity	Pf00063, Pf01442, Pf01496, Pf01576, Pf01765, Pf02736, Pf03962, Pf04111, Pf04156, Pf05911, Pf06637, Pf07888, Pf09731, Pf11068, Pf11559, Pf12128, Pf13094	0.018	28	1
TRUE	High	Master Protein	P07737	Profilin-1 OS=Homo sapiens GN=PFN1 PE=1 SV=2	0	1.855	10	1	1	1	1	140	15	8.27	Not Found	Not Found		5216	ENSG00000108518.7	PFN1	17	cell organization and biogenesis;regulation of biological process;response to stimulus	cytoplasm;cytoskeleton;cytosol;membrane;nucleus	enzyme regulator activity;nucleotide binding;protein binding;RNA binding	Pf00235	0.292	39	1
TRUE	High	Master Protein	P22087	rRNA 2'-O-methyltransferase fibrillarin OS=Homo sapiens GN=FBL PE=1 SV=2	0	1.819	10.2804	1	1	1	1	321	33.8	10.18	Not Found	Not Found		2091	ENSG00000280548.3; ENSG00000105202.8	FBL	19; CHR_HG2021_PATCH	cell differentiation;cell organization and biogenesis;metabolic process	chromosome;membrane;nucleus	catalytic activity;protein binding;RNA binding	Pf01135, Pf01269, Pf13847	0.105	28	1
TRUE	High	Master Protein	P00558	Phosphoglycerate kinase 1 OS=Homo sapiens GN=PGK1 PE=1 SV=3	0	1.78	4.31655	1	2	1	1	417	44.6	8.1	Not Found	Not Found		5230	ENSG00000102144.13	PGK1	X	cell differentiation;metabolic process;regulation of biological process;response to stimulus	cytoplasm;cytosol;membrane	catalytic activity;nucleotide binding;protein binding	Pf00162	0.08	67	1
TRUE	High	Master Protein	Q14240	Eukaryotic initiation factor 4A-II OS=Homo sapiens GN=EIF4A2 PE=1 SV=2	0	1.775	7.12531	2	2	2	1	407	46.4	5.48	Not Found	Not Found		1974	ENSG00000156976.16	EIF4A2	3	metabolic process;regulation of biological process	cytosol	catalytic activity;DNA binding;nucleotide binding;protein binding;RNA binding	Pf00270, Pf00271, Pf04851	0.212	23	2
TRUE	High	Master Protein	P07355	Annexin A2 OS=Homo sapiens GN=ANXA2 PE=1 SV=2	0	1.714	4.12979	1	2	1	1	339	38.6	7.75	Not Found	Not Found		302	ENSG00000182718.16	ANXA2	15	cell organization and biogenesis;metabolic process;regulation of biological process;response to stimulus;transport	cell surface;cytoplasm;cytosol;endoplasmic reticulum;endosome;extracellular;membrane;nucleus;organelle lumen	enzyme regulator activity;metal ion binding;protein binding;RNA binding	Pf00191	0.101	33	1
TRUE	High	Master Protein	Q15365	Poly(rC)-binding protein 1 OS=Homo sapiens GN=PCBP1 PE=1 SV=2	0	1.262	5.89888	1	1	1	1	356	37.5	7.09	Not Found	Not Found		5093	ENSG00000169564.6	PCBP1	2	metabolic process;regulation of biological process	cytoplasm;cytosol;membrane;nucleus	DNA binding;protein binding;RNA binding	Pf00013, Pf13014	0.116	24	1
TRUE	High	Master Protein	P08670	Vimentin OS=Homo sapiens GN=VIM PE=1 SV=4	0	1.22	4.07725	1	1	1	1	466	53.6	5.12	Not Found	Not Found		7431	ENSG00000026025.15	VIM	10	cell differentiation;cell organization and biogenesis;cellular component movement;metabolic process;regulation of biological process;response to stimulus	cytoplasm;cytoskeleton;cytosol;membrane	protein binding;RNA binding;structural molecule activity	Pf00038, Pf04111, Pf04156, Pf04732, Pf05622, Pf10186	0.07	39	1
TRUE	High	Master Protein	P08238	Heat shock protein HSP 90-beta OS=Homo sapiens GN=HSP90AB1 PE=1 SV=4	0	1.103	2.62431	1	1	1	1	724	83.2	5.03	Not Found	Not Found		3326	ENSG00000096384.19	HSP90AB1	6	cell organization and biogenesis;metabolic process;regulation of biological process;response to stimulus;transport	cell surface;cytoplasm;cytosol;extracellular;membrane;mitochondrion;nucleus;organelle lumen	enzyme regulator activity;nucleotide binding;protein binding;RNA binding	Pf00183, Pf02518, Pf13589	0.055	21	1
TRUE	High	Master Protein	A0A0C4DH25	Immunoglobulin kappa variable 3D-20 OS=Homo sapiens GN=IGKV3D-20 PE=3 SV=1	0	1.084	13.7931	1	1	1	1	116	12.5	4.59	Not Found	Not Found		28874	ENSG00000211625.2	IGKV3D-20	2	cellular component movement;metabolic process;regulation of biological process;response to stimulus;transport	extracellular;membrane	catalytic activity	Pf00047, Pf07686	0.468	28	1
TRUE	High	Master Protein	P30050	60S ribosomal protein L12 OS=Homo sapiens GN=RPL12 PE=1 SV=1	0.009	0.91	9.09091	1	1	1	1	165	17.8	9.42	Not Found	Not Found		6136	ENSG00000197958.12	RPL12	9	cell organization and biogenesis;metabolic process;transport	cytosol;membrane;ribosome	protein binding;RNA binding;structural molecule activity	Pf00298, Pf03946	0.233	23	1
