# Supplementary material for: Probing the Immunoreceptor Tyrosine-Based Inhibition Motif Interaction Protein Partners with Proteomics
Source: Molecules. 2024 Apr 25;29(9):1977. doi: 10.3390/molecules29091977 (PMC11085718; doi:10.3390/molecules29091977)
Supplement: Supplementary file 1 [file molecules-29-01977-s001.zip › Table S3-PD1-N-ITIM.xlsx]

## Sheet: Proteins
Checked	Protein FDR Confidence: Combined	Master	Accession	Description	Exp. q-value: Combined	Sum PEP Score	Coverage [%]	# Peptides	# PSMs	# Unique Peptides	# Protein Groups	# AAs	MW [kDa]	calc. pI	Score Sequest HT: Sequest HT	# Peptides (by Search Engine): Sequest HT
FALSE	High	Master Protein	P04264	Keratin, type II cytoskeletal 1 OS=Homo sapiens OX=9606 GN=KRT1 PE=1 SV=6	0	91.243	54	28	123	25	1	644	66	8.12	253.27	28
FALSE	High	Master Protein	P35908	Keratin, type II cytoskeletal 2 epidermal OS=Homo sapiens OX=9606 GN=KRT2 PE=1 SV=2	0	66.607	50	21	43	17	1	639	65.4	8	82.91	21
FALSE	High	Master Protein	H3BPE7	RNA-binding protein FUS OS=Homo sapiens OX=9606 GN=FUS PE=1 SV=1	0	65.984	18	13	113	12	1	527	53.5	9.36	248	13
FALSE	High	Master Protein	Q00839	Heterogeneous nuclear ribonucleoprotein U OS=Homo sapiens OX=9606 GN=HNRNPU PE=1 SV=6	0	64.877	22	23	37	23	1	825	90.5	6	69.42	23
FALSE	High	Master Protein	P13645	Keratin, type I cytoskeletal 10 OS=Homo sapiens OX=9606 GN=KRT10 PE=1 SV=6	0	62.318	39	21	58	18	1	584	58.8	5.21	113.88	21
FALSE	High	Master Protein	P22626	Heterogeneous nuclear ribonucleoproteins A2/B1 OS=Homo sapiens OX=9606 GN=HNRNPA2B1 PE=1 SV=2	0	55.844	53	16	38	14	1	353	37.4	8.95	61.01	16
FALSE	High	Master Protein	P35527	Keratin, type I cytoskeletal 9 OS=Homo sapiens OX=9606 GN=KRT9 PE=1 SV=3	0	42.875	32	16	44	16	1	623	62	5.24	87.43	16
FALSE	High	Master Protein	P07437	Tubulin beta chain OS=Homo sapiens OX=9606 GN=TUBB PE=1 SV=2	0	33.603	34	13	20	2	1	444	49.6	4.89	38.5	13
FALSE	High	Master Protein	Q06830	Peroxiredoxin-1 OS=Homo sapiens OX=9606 GN=PRDX1 PE=1 SV=1	0	33.571	58	11	17	10	1	199	22.1	8.13	28.38	11
FALSE	High	Master Protein	P33992	DNA replication licensing factor MCM5 OS=Homo sapiens OX=9606 GN=MCM5 PE=1 SV=5	0	31.767	19	14	16	14	1	734	82.2	8.37	27.88	14
FALSE	High	Master Protein	P68371	Tubulin beta-4B chain OS=Homo sapiens OX=9606 GN=TUBB4B PE=1 SV=1	0	31.599	34	13	20	2	1	445	49.8	4.89	38.25	13
FALSE	High	Master Protein	P48668	Keratin, type II cytoskeletal 6C OS=Homo sapiens OX=9606 GN=KRT6C PE=1 SV=3	0	31.454	26	13	22	8	1	564	60	8	33.16	13
FALSE	High	Master Protein	J3KTA4	Probable ATP-dependent RNA helicase DDX5 OS=Homo sapiens OX=9606 GN=DDX5 PE=1 SV=1	0	30.377	21	11	16	7	1	614	69	8.85	22.91	11
FALSE	High	Master Protein	P06733	Alpha-enolase OS=Homo sapiens OX=9606 GN=ENO1 PE=1 SV=2	0	29.677	37	11	11	11	1	434	47.1	7.39	24.35	11
FALSE	High	Master Protein	A0A0D9SF53	ATP-dependent RNA helicase DDX3X OS=Homo sapiens OX=9606 GN=DDX3X PE=1 SV=1	0	29.608	19	13	17	12	1	733	81.4	8.07	33.39	13
FALSE	High	Master Protein	Q92499	ATP-dependent RNA helicase DDX1 OS=Homo sapiens OX=9606 GN=DDX1 PE=1 SV=2	0	29.024	26	16	16	16	1	740	82.4	7.23	22.24	16
FALSE	High	Master Protein	P68366	Tubulin alpha-4A chain OS=Homo sapiens OX=9606 GN=TUBA4A PE=1 SV=1	0	26.263	28	9	13	1	1	448	49.9	5.06	31.42	9
FALSE	High	Master Protein	P68104	Elongation factor 1-alpha 1 OS=Homo sapiens OX=9606 GN=EEF1A1 PE=1 SV=1	0	26.234	21	9	13	4	1	462	50.1	9.01	26.73	9
FALSE	High	Master Protein	P62829	60S ribosomal protein L23 OS=Homo sapiens OX=9606 GN=RPL23 PE=1 SV=1	0	24.953	32	8	14	8	1	140	14.9	10.51	24.9	8
FALSE	High	Master Protein	P54886	Delta-1-pyrroline-5-carboxylate synthase OS=Homo sapiens OX=9606 GN=ALDH18A1 PE=1 SV=2	0	24.9	18	12	14	12	1	795	87.2	7.12	21.01	12
FALSE	High	Master Protein	P53621	Coatomer subunit alpha OS=Homo sapiens OX=9606 GN=COPA PE=1 SV=2	0	24.576	9	8	10	8	1	1224	138.3	7.66	22.73	8
FALSE	High	Master Protein	Q71U36	Tubulin alpha-1A chain OS=Homo sapiens OX=9606 GN=TUBA1A PE=1 SV=1	0	24.153	31	10	13	1	1	451	50.1	5.06	31.52	10
FALSE	High	Master Protein	Q86YZ3	Hornerin OS=Homo sapiens OX=9606 GN=HRNR PE=1 SV=2	0	23.74	8	8	11	8	1	2850	282.2	10.04	21.33	8
FALSE	High	Master Protein	P09651	Heterogeneous nuclear ribonucleoprotein A1 OS=Homo sapiens OX=9606 GN=HNRNPA1 PE=1 SV=5	0	23.29	28	7	10	5	1	372	38.7	9.13	21.64	7
FALSE	High	Master Protein	F5H5D3	Tubulin alpha chain OS=Homo sapiens OX=9606 GN=TUBA1C PE=1 SV=1	0	22.861	24	9	13	1	1	519	57.7	5.07	30.83	9
FALSE	High	Master Protein	P62701	40S ribosomal protein S4, X isoform OS=Homo sapiens OX=9606 GN=RPS4X PE=1 SV=2	0	22.585	40	9	11	9	1	263	29.6	10.15	17.44	9
FALSE	High	Master Protein	Q9ULV4	Coronin-1C OS=Homo sapiens OX=9606 GN=CORO1C PE=1 SV=1	0	22.208	23	9	11	9	1	474	53.2	7.08	20.47	9
FALSE	High	Master Protein	Q9Y3I0	tRNA-splicing ligase RtcB homolog OS=Homo sapiens OX=9606 GN=RTCB PE=1 SV=1	0	22.046	18	7	10	7	1	505	55.2	7.23	23.2	7
FALSE	High	Master Protein	P31689	DnaJ homolog subfamily A member 1 OS=Homo sapiens OX=9606 GN=DNAJA1 PE=1 SV=2	0	21.439	24	9	10	9	1	397	44.8	7.08	19	9
FALSE	High	Master Protein	A0A1W2PQ51	Probable ATP-dependent RNA helicase DDX17 OS=Homo sapiens OX=9606 GN=DDX17 PE=1 SV=1	0	21.323	15	9	15	5	1	731	80.4	8.37	27.67	9
FALSE	High	Master Protein	Q14103	Heterogeneous nuclear ribonucleoprotein D0 OS=Homo sapiens OX=9606 GN=HNRNPD PE=1 SV=1	0	20.909	19	9	15	8	1	355	38.4	7.81	28.23	9
FALSE	High	Master Protein	P13647	Keratin, type II cytoskeletal 5 OS=Homo sapiens OX=9606 GN=KRT5 PE=1 SV=3	0	20.902	18	10	17	6	1	590	62.3	7.74	21.61	10
FALSE	High	Master Protein	P23396	40S ribosomal protein S3 OS=Homo sapiens OX=9606 GN=RPS3 PE=1 SV=2	0	20.836	48	12	12	12	1	243	26.7	9.66	15.69	12
FALSE	High	Master Protein	A0A087WTP3	Far upstream element-binding protein 2 OS=Homo sapiens OX=9606 GN=KHSRP PE=1 SV=1	0	20.763	18	9	11	9	1	711	73	7.71	25.79	9
FALSE	High	Master Protein	P61247	40S ribosomal protein S3a OS=Homo sapiens OX=9606 GN=RPS3A PE=1 SV=2	0	20.588	25	8	12	8	1	264	29.9	9.73	14.38	8
FALSE	High	Master Protein	P15880	40S ribosomal protein S2 OS=Homo sapiens OX=9606 GN=RPS2 PE=1 SV=2	0	19.918	21	6	8	6	1	293	31.3	10.24	13.02	6
FALSE	High	Master Protein	P31040	Succinate dehydrogenase [ubiquinone] flavoprotein subunit, mitochondrial OS=Homo sapiens OX=9606 GN=SDHA PE=1 SV=2	0	19.494	17	9	10	9	1	664	72.6	7.39	17.12	9
FALSE	High	Master Protein	P62280	40S ribosomal protein S11 OS=Homo sapiens OX=9606 GN=RPS11 PE=1 SV=3	0	18.823	46	11	13	11	1	158	18.4	10.3	9.4	11
FALSE	High	Master Protein	P15924	Desmoplakin OS=Homo sapiens OX=9606 GN=DSP PE=1 SV=3	0	18.105	5	13	13	13	1	2871	331.6	6.81	13.8	13
FALSE	High	Master Protein	G8JLB6	Heterogeneous nuclear ribonucleoprotein H OS=Homo sapiens OX=9606 GN=HNRNPH1 PE=1 SV=1	0	18.09	17	5	8	2	1	472	51.2	6.8	13.9	5
FALSE	High	Master Protein	P21291	Cysteine and glycine-rich protein 1 OS=Homo sapiens OX=9606 GN=CSRP1 PE=1 SV=3	0	18.04	56	8	16	8	1	193	20.6	8.57	37.14	8
FALSE	High	Master Protein	P02533	Keratin, type I cytoskeletal 14 OS=Homo sapiens OX=9606 GN=KRT14 PE=1 SV=4	0	17.935	20	8	17	2	1	472	51.5	5.16	29.86	8
FALSE	High	Master Protein	P33993	DNA replication licensing factor MCM7 OS=Homo sapiens OX=9606 GN=MCM7 PE=1 SV=4	0	17.822	11	5	5	5	1	719	81.3	6.46	13.45	5
FALSE	High	Master Protein	P31327	Carbamoyl-phosphate synthase [ammonia], mitochondrial OS=Homo sapiens OX=9606 GN=CPS1 PE=1 SV=2	0	17.703	8	9	9	9	1	1500	164.8	6.74	20.33	9
FALSE	High	Master Protein	P51991	Heterogeneous nuclear ribonucleoprotein A3 OS=Homo sapiens OX=9606 GN=HNRNPA3 PE=1 SV=2	0	17.529	18	8	9	8	1	378	39.6	9.01	14.82	8
FALSE	High	Master Protein	Q9BUJ2	Heterogeneous nuclear ribonucleoprotein U-like protein 1 OS=Homo sapiens OX=9606 GN=HNRNPUL1 PE=1 SV=2	0	17.317	12	6	7	6	1	856	95.7	6.92	16.49	6
FALSE	High	Master Protein	A0A2U3TZH3	Elongation factor 1-alpha OS=Homo sapiens OX=9606 GN=EEF1A2 PE=1 SV=1	0	17.276	15	6	8	1	1	496	54.3	9.04	19.16	6
FALSE	High	Master Protein	Q9UBN7	Histone deacetylase 6 OS=Homo sapiens OX=9606 GN=HDAC6 PE=1 SV=2	0	17.078	10	7	8	7	1	1215	131.3	5.3	16.81	7
FALSE	High	Master Protein	Q14847	LIM and SH3 domain protein 1 OS=Homo sapiens OX=9606 GN=LASP1 PE=1 SV=2	0	16.616	30	9	11	9	1	261	29.7	7.05	15.01	9
FALSE	High	Master Protein	P53992	Protein transport protein Sec24C OS=Homo sapiens OX=9606 GN=SEC24C PE=1 SV=3	0	16.452	9	7	8	7	1	1094	118.2	7.06	12.9	7
FALSE	High	Master Protein	Q01813	ATP-dependent 6-phosphofructokinase, platelet type OS=Homo sapiens OX=9606 GN=PFKP PE=1 SV=2	0	16.35	15	9	10	9	1	784	85.5	7.55	16.87	9
FALSE	High	Master Protein	Q9BUF5	Tubulin beta-6 chain OS=Homo sapiens OX=9606 GN=TUBB6 PE=1 SV=1	0	16.032	26	8	10	3	1	446	49.8	4.88	21.77	8
FALSE	High	Master Protein	Q96T51	RUN and FYVE domain-containing protein 1 OS=Homo sapiens OX=9606 GN=RUFY1 PE=1 SV=2	0	15.664	17	8	8	8	1	708	79.8	5.74	15.48	8
FALSE	High	Master Protein	P60709	Actin, cytoplasmic 1 OS=Homo sapiens OX=9606 GN=ACTB PE=1 SV=1	0	15.51	19	6	9	1	1	375	41.7	5.48	7.22	6
FALSE	High	Master Protein	Q52LJ0	Protein FAM98B OS=Homo sapiens OX=9606 GN=FAM98B PE=1 SV=1	0	15.332	14	4	7	4	1	330	37.2	6.29	16.19	4
FALSE	High	Master Protein	Q96AG4	Leucine-rich repeat-containing protein 59 OS=Homo sapiens OX=9606 GN=LRRC59 PE=1 SV=1	0	14.999	21	6	6	6	1	307	34.9	9.57	12.79	6
FALSE	High	Master Protein	Q13751	Laminin subunit beta-3 OS=Homo sapiens OX=9606 GN=LAMB3 PE=1 SV=1	0	14.821	9	8	8	8	1	1172	129.5	7.21	12.52	8
FALSE	High	Master Protein	P11142	Heat shock cognate 71 kDa protein OS=Homo sapiens OX=9606 GN=HSPA8 PE=1 SV=1	0	14.737	11	6	7	6	1	646	70.9	5.52	14.28	6
FALSE	High	Master Protein	P31942	Heterogeneous nuclear ribonucleoprotein H3 OS=Homo sapiens OX=9606 GN=HNRNPH3 PE=1 SV=2	0	14.345	23	5	7	5	1	346	36.9	6.87	13.47	5
FALSE	High	Master Protein	P62937	Peptidyl-prolyl cis-trans isomerase A OS=Homo sapiens OX=9606 GN=PPIA PE=1 SV=2	0	14.175	40	5	10	5	1	165	18	7.81	17.44	5
FALSE	High	Master Protein	Q9Y224	RNA transcription, translation and transport factor protein OS=Homo sapiens OX=9606 GN=RTRAF PE=1 SV=1	0	13.934	21	4	6	4	1	244	28.1	6.65	11.79	4
FALSE	High	Master Protein	P68032	Actin, alpha cardiac muscle 1 OS=Homo sapiens OX=9606 GN=ACTC1 PE=1 SV=1	0	13.572	22	7	10	2	1	377	42	5.39	8.32	7
FALSE	High	Master Protein	Q9HA64	Ketosamine-3-kinase OS=Homo sapiens OX=9606 GN=FN3KRP PE=1 SV=2	0	13.567	17	5	8	5	1	309	34.4	7.33	14.06	5
FALSE	High	Master Protein	H3BNC9	Uncharacterized protein OS=Homo sapiens OX=9606 PE=3 SV=2	0	13.441	9	6	7	6	1	584	64.5	8.78	9.75	6
FALSE	High	Master Protein	P21333	Filamin-A OS=Homo sapiens OX=9606 GN=FLNA PE=1 SV=4	0	13.243	3	6	7	6	1	2647	280.6	6.06	8.94	6
FALSE	High	Master Protein	P63244	Receptor of activated protein C kinase 1 OS=Homo sapiens OX=9606 GN=RACK1 PE=1 SV=3	0	13.173	26	5	5	5	1	317	35.1	7.69	11.5	5
FALSE	High	Master Protein	P05787	Keratin, type II cytoskeletal 8 OS=Homo sapiens OX=9606 GN=KRT8 PE=1 SV=7	0	13.099	12	6	24	3	1	483	53.7	5.59	38.68	6
FALSE	High	Master Protein	P04406	Glyceraldehyde-3-phosphate dehydrogenase OS=Homo sapiens OX=9606 GN=GAPDH PE=1 SV=3	0	13.076	24	5	5	5	1	335	36	8.46	11.6	5
FALSE	High	Master Protein	P62753	40S ribosomal protein S6 OS=Homo sapiens OX=9606 GN=RPS6 PE=1 SV=1	0	13.044	22	5	8	5	1	249	28.7	10.84	12.3	5
FALSE	High	Master Protein	P02768	Serum albumin OS=Homo sapiens OX=9606 GN=ALB PE=1 SV=2	0	12.967	8	6	29	6	1	609	69.3	6.28	24.79	6
FALSE	High	Master Protein	Q99729	Heterogeneous nuclear ribonucleoprotein A/B OS=Homo sapiens OX=9606 GN=HNRNPAB PE=1 SV=2	0	12.959	18	6	11	5	1	332	36.2	8.21	16.78	6
FALSE	High	Master Protein	O00622	Protein CYR61 OS=Homo sapiens OX=9606 GN=CYR61 PE=1 SV=1	0	12.926	17	6	9	6	1	381	42	8.21	12.72	6
FALSE	High	Master Protein	P62269	40S ribosomal protein S18 OS=Homo sapiens OX=9606 GN=RPS18 PE=1 SV=3	0	12.634	38	9	11	7	1	152	17.7	10.99	13.81	9
FALSE	High	Master Protein	P62263	40S ribosomal protein S14 OS=Homo sapiens OX=9606 GN=RPS14 PE=1 SV=3	0	12.61	28	5	7	5	1	151	16.3	10.05	11.98	5
FALSE	High	Master Protein	P36578	60S ribosomal protein L4 OS=Homo sapiens OX=9606 GN=RPL4 PE=1 SV=5	0	12.547	14	5	5	5	1	427	47.7	11.06	8.89	5
FALSE	High	Master Protein	Q06210	Glutamine--fructose-6-phosphate aminotransferase [isomerizing] 1 OS=Homo sapiens OX=9606 GN=GFPT1 PE=1 SV=3	0	12.001	10	5	6	5	1	699	78.8	7.11	11.99	5
FALSE	High	Master Protein	P05141	ADP/ATP translocase 2 OS=Homo sapiens OX=9606 GN=SLC25A5 PE=1 SV=7	0	11.984	25	6	7	3	1	298	32.8	9.69	8.39	6
FALSE	High	Master Protein	P16402	Histone H1.3 OS=Homo sapiens OX=9606 GN=HIST1H1D PE=1 SV=2	0	11.975	17	6	6	6	1	221	22.3	11.02	8.52	6
FALSE	High	Master Protein	P14923	Junction plakoglobin OS=Homo sapiens OX=9606 GN=JUP PE=1 SV=3	0	11.886	8	4	5	4	1	745	81.7	6.14	13.99	4
FALSE	High	Master Protein	A0A0A0MTH3	Integrin-linked protein kinase OS=Homo sapiens OX=9606 GN=ILK PE=1 SV=1	0	11.728	16	6	6	6	1	483	54.6	7.97	11.79	6
FALSE	High	Master Protein	Q14244	Ensconsin OS=Homo sapiens OX=9606 GN=MAP7 PE=1 SV=1	0	11.546	12	5	6	5	1	749	84	9.61	8.14	5
FALSE	High	Master Protein	A0A0A6YYJ8	Putative RNA-binding protein Luc7-like 2 OS=Homo sapiens OX=9606 GN=LUC7L2 PE=4 SV=1	0	11.536	9	4	7	4	1	458	54.2	10.13	13.29	4
FALSE	High	Master Protein	P62277	40S ribosomal protein S13 OS=Homo sapiens OX=9606 GN=RPS13 PE=1 SV=2	0	11.528	19	4	5	4	1	151	17.2	10.54	9.17	4
FALSE	High	Master Protein	P62913	60S ribosomal protein L11 OS=Homo sapiens OX=9606 GN=RPL11 PE=1 SV=2	0	11.363	29	4	6	4	1	178	20.2	9.6	11.89	4
FALSE	High	Master Protein	A0A024R4M0	40S ribosomal protein S9 OS=Homo sapiens OX=9606 GN=RPS9 PE=1 SV=1	0	11.215	17	5	7	5	1	194	22.6	10.65	9.2	5
FALSE	High	Master Protein	P04818	Thymidylate synthase OS=Homo sapiens OX=9606 GN=TYMS PE=1 SV=3	0	11.026	14	3	5	3	1	313	35.7	7.01	11.86	3
FALSE	High	Master Protein	P41091	Eukaryotic translation initiation factor 2 subunit 3 OS=Homo sapiens OX=9606 GN=EIF2S3 PE=1 SV=3	0	10.808	14	4	5	4	1	472	51.1	8.4	6.37	4
FALSE	High	Master Protein	O75340	Programmed cell death protein 6 OS=Homo sapiens OX=9606 GN=PDCD6 PE=1 SV=1	0	10.762	21	4	5	4	1	191	21.9	5.4	6.3	4
FALSE	High	Master Protein	Q96I24	Far upstream element-binding protein 3 OS=Homo sapiens OX=9606 GN=FUBP3 PE=1 SV=2	0	10.751	13	5	5	5	1	572	61.6	8.38	7.02	5
FALSE	High	Master Protein	A6NMY6	Putative annexin A2-like protein OS=Homo sapiens OX=9606 GN=ANXA2P2 PE=5 SV=2	0	10.744	13	3	4	3	1	339	38.6	6.95	9.42	3
FALSE	High	Master Protein	P60866	40S ribosomal protein S20 OS=Homo sapiens OX=9606 GN=RPS20 PE=1 SV=1	0	10.737	23	3	4	3	1	119	13.4	9.94	7.3	3
FALSE	High	Master Protein	P08238	Heat shock protein HSP 90-beta OS=Homo sapiens OX=9606 GN=HSP90AB1 PE=1 SV=4	0	10.621	9	5	6	3	1	724	83.2	5.03	6.14	5
FALSE	High	Master Protein	P31483	Nucleolysin TIA-1 isoform p40 OS=Homo sapiens OX=9606 GN=TIA1 PE=1 SV=3	0	10.55	11	4	5	3	1	386	42.9	7.74	8.31	4
FALSE	High	Master Protein	A0A2R8Y5Y7	60S ribosomal protein L9 OS=Homo sapiens OX=9606 GN=RPL9 PE=1 SV=1	0	10.472	26	4	5	4	1	220	25	9.74	9.6	4
FALSE	High	Master Protein	P39019	40S ribosomal protein S19 OS=Homo sapiens OX=9606 GN=RPS19 PE=1 SV=2	0	10.398	34	6	6	6	1	145	16.1	10.32	6.15	6
FALSE	High	Master Protein	P55795	Heterogeneous nuclear ribonucleoprotein H2 OS=Homo sapiens OX=9606 GN=HNRNPH2 PE=1 SV=1	0	10.39	10	3	5	1	1	449	49.2	6.3	7.97	3
FALSE	High	Master Protein	Q13151	Heterogeneous nuclear ribonucleoprotein A0 OS=Homo sapiens OX=9606 GN=HNRNPA0 PE=1 SV=1	0	10.162	16	4	4	4	1	305	30.8	9.29	7.77	4
FALSE	High	Master Protein	P08779	Keratin, type I cytoskeletal 16 OS=Homo sapiens OX=9606 GN=KRT16 PE=1 SV=4	0	10.136	12	6	12	1	1	473	51.2	5.05	15.1	6
FALSE	High	Master Protein	P78527	DNA-dependent protein kinase catalytic subunit OS=Homo sapiens OX=9606 GN=PRKDC PE=1 SV=3	0	10.062	2	7	7	7	1	4128	468.8	7.12	8.1	7
FALSE	High	Master Protein	Q15437	Protein transport protein Sec23B OS=Homo sapiens OX=9606 GN=SEC23B PE=1 SV=2	0	10.021	10	5	5	4	1	767	86.4	6.89	10.73	5
FALSE	High	Master Protein	P16455	Methylated-DNA--protein-cysteine methyltransferase OS=Homo sapiens OX=9606 GN=MGMT PE=1 SV=1	0	10	32	4	4	4	1	207	21.6	8.1	5.38	4
FALSE	High	Master Protein	Q14134	Tripartite motif-containing protein 29 OS=Homo sapiens OX=9606 GN=TRIM29 PE=1 SV=2	0	9.989	7	6	6	6	1	588	65.8	7.15	2.49	6
FALSE	High	Master Protein	P50454	Serpin H1 OS=Homo sapiens OX=9606 GN=SERPINH1 PE=1 SV=2	0	9.881	13	4	6	4	1	418	46.4	8.69	10.13	4
FALSE	High	Master Protein	P09874	Poly [ADP-ribose] polymerase 1 OS=Homo sapiens OX=9606 GN=PARP1 PE=1 SV=4	0	9.738	5	5	5	5	1	1014	113	8.88	3.74	5
FALSE	High	Master Protein	Q96AB3	Isochorismatase domain-containing protein 2 OS=Homo sapiens OX=9606 GN=ISOC2 PE=1 SV=1	0	9.714	25	3	5	3	1	205	22.3	7.77	14.75	3
FALSE	High	Master Protein	Q86X55	Histone-arginine methyltransferase CARM1 OS=Homo sapiens OX=9606 GN=CARM1 PE=1 SV=3	0	9.628	10	4	4	4	1	608	65.8	6.73	7.02	4
FALSE	High	Master Protein	P62081	40S ribosomal protein S7 OS=Homo sapiens OX=9606 GN=RPS7 PE=1 SV=1	0	9.568	19	4	5	4	1	194	22.1	10.1	11.92	4
FALSE	High	Master Protein	Q04695	Keratin, type I cytoskeletal 17 OS=Homo sapiens OX=9606 GN=KRT17 PE=1 SV=2	0	9.53	13	6	11	2	1	432	48.1	5.02	14.9	6
FALSE	High	Master Protein	A0A0A0MSG2	Four and a half LIM domains protein 2 OS=Homo sapiens OX=9606 GN=FHL2 PE=1 SV=1	0	9.404	12	5	6	5	1	395	44.8	8.06	7.86	5
FALSE	High	Master Protein	Q92804	TATA-binding protein-associated factor 2N OS=Homo sapiens OX=9606 GN=TAF15 PE=1 SV=1	0	9.376	6	4	16	3	1	592	61.8	8.02	27.84	4
FALSE	High	Master Protein	A0A0G2JIW1	Heat shock 70 kDa protein 1B OS=Homo sapiens OX=9606 GN=HSPA1B PE=1 SV=1	0	9.364	9	5	5	5	1	642	70.1	5.66	11.51	5
FALSE	High	Master Protein	Q9NXV6	CDKN2A-interacting protein OS=Homo sapiens OX=9606 GN=CDKN2AIP PE=1 SV=3	0	9.198	11	4	4	4	1	580	61.1	9.01	8.81	4
FALSE	High	Master Protein	P08729	Keratin, type II cytoskeletal 7 OS=Homo sapiens OX=9606 GN=KRT7 PE=1 SV=5	0	9.197	9	4	19	1	1	469	51.4	5.48	37.92	4
FALSE	High	Master Protein	Q01085	Nucleolysin TIAR OS=Homo sapiens OX=9606 GN=TIAL1 PE=1 SV=1	0	8.85	11	4	5	3	1	375	41.6	7.74	8.48	4
FALSE	High	Master Protein	P62906	60S ribosomal protein L10a OS=Homo sapiens OX=9606 GN=RPL10A PE=1 SV=2	0	8.628	24	4	5	4	1	217	24.8	9.94	9.05	4
FALSE	High	Master Protein	Q9H0D6	5'-3' exoribonuclease 2 OS=Homo sapiens OX=9606 GN=XRN2 PE=1 SV=1	0	8.527	7	5	5	5	1	950	108.5	7.47	8.99	5
FALSE	High	Master Protein	Q9UBV8	Peflin OS=Homo sapiens OX=9606 GN=PEF1 PE=1 SV=1	0	8.384	17	4	6	4	1	284	30.4	6.54	11.67	4
FALSE	High	Master Protein	P07900	Heat shock protein HSP 90-alpha OS=Homo sapiens OX=9606 GN=HSP90AA1 PE=1 SV=5	0	8.329	5	3	4	1	1	732	84.6	5.02	6.2	3
FALSE	High	Master Protein	Q99497	Protein/nucleic acid deglycase DJ-1 OS=Homo sapiens OX=9606 GN=PARK7 PE=1 SV=2	0	8.251	25	4	4	4	1	189	19.9	6.79	7.93	4
FALSE	High	Master Protein	Q92616	eIF-2-alpha kinase activator GCN1 OS=Homo sapiens OX=9606 GN=GCN1 PE=1 SV=6	0	8.164	3	5	5	5	1	2671	292.6	7.47	5.9	5
FALSE	High	Master Protein	Q15637	Splicing factor 1 OS=Homo sapiens OX=9606 GN=SF1 PE=1 SV=4	0	8.128	8	3	4	3	1	639	68.3	8.98	10.57	3
FALSE	High	Master Protein	P11940	Polyadenylate-binding protein 1 OS=Homo sapiens OX=9606 GN=PABPC1 PE=1 SV=2	0	8.001	9	5	5	5	1	636	70.6	9.5	6.4	5
FALSE	High	Master Protein	Q08380	Galectin-3-binding protein OS=Homo sapiens OX=9606 GN=LGALS3BP PE=1 SV=1	0	7.947	8	4	5	4	1	585	65.3	5.27	8.64	4
FALSE	High	Master Protein	K7ELC2	40S ribosomal protein S15 OS=Homo sapiens OX=9606 GN=RPS15 PE=1 SV=1	0	7.945	26	2	6	2	1	152	17.7	10.39	11.91	2
FALSE	High	Master Protein	M0R0R2	40S ribosomal protein S5 OS=Homo sapiens OX=9606 GN=RPS5 PE=1 SV=1	0	7.874	13	4	5	4	1	225	25.3	9.76	6.58	4
FALSE	High	Master Protein	O95573	Long-chain-fatty-acid--CoA ligase 3 OS=Homo sapiens OX=9606 GN=ACSL3 PE=1 SV=3	0	7.832	5	3	4	3	1	720	80.4	8.38	5.17	3
FALSE	High	Master Protein	Q01844	RNA-binding protein EWS OS=Homo sapiens OX=9606 GN=EWSR1 PE=1 SV=1	0	7.745	6	4	4	4	1	656	68.4	9.33	8.68	4
FALSE	High	Master Protein	Q9H2G2	STE20-like serine/threonine-protein kinase OS=Homo sapiens OX=9606 GN=SLK PE=1 SV=1	0	7.735	5	5	7	5	1	1235	142.6	5.15	7.87	5
FALSE	High	Master Protein	P35579	Myosin-9 OS=Homo sapiens OX=9606 GN=MYH9 PE=1 SV=4	0	7.705	3	5	5	5	1	1960	226.4	5.6	7.14	5
FALSE	High	Master Protein	Q2TB90	Putative hexokinase HKDC1 OS=Homo sapiens OX=9606 GN=HKDC1 PE=1 SV=3	0	7.641	5	4	4	4	1	917	102.5	7.12	0	4
FALSE	High	Master Protein	A0A0A6YYL6	Protein RPL17-C18orf32 OS=Homo sapiens OX=9606 GN=RPL17-C18orf32 PE=3 SV=1	0	7.624	5	2	3	2	1	228	26.4	10.1	9.04	2
FALSE	High	Master Protein	P50914	60S ribosomal protein L14 OS=Homo sapiens OX=9606 GN=RPL14 PE=1 SV=4	0	7.591	16	3	4	3	1	215	23.4	10.93	6.25	3
FALSE	High	Master Protein	A0A0G2JQH2	40S ribosomal protein S18 OS=Homo sapiens OX=9606 GN=RPS18 PE=1 SV=1	0	7.517	70	3	4	1	1	33	3.8	11	6.05	3
FALSE	High	Master Protein	P62633	Cellular nucleic acid-binding protein OS=Homo sapiens OX=9606 GN=CNBP PE=1 SV=1	0	7.514	19	3	3	3	1	177	19.5	7.71	6.36	3
FALSE	High	Master Protein	E7EMK3	Flotillin-2 OS=Homo sapiens OX=9606 GN=FLOT2 PE=1 SV=1	0	7.466	10	3	4	3	1	483	53.1	5.24	4.85	3
FALSE	High	Master Protein	Q96PK6	RNA-binding protein 14 OS=Homo sapiens OX=9606 GN=RBM14 PE=1 SV=2	0	7.414	9	5	6	5	1	669	69.4	9.67	4.56	5
FALSE	High	Master Protein	P41743	Protein kinase C iota type OS=Homo sapiens OX=9606 GN=PRKCI PE=1 SV=2	0	7.414	7	2	3	2	1	596	68.2	5.85	8.03	2
FALSE	High	Master Protein	P08574	Cytochrome c1, heme protein, mitochondrial OS=Homo sapiens OX=9606 GN=CYC1 PE=1 SV=3	0	7.389	9	2	3	2	1	325	35.4	9	7.5	2
FALSE	High	Master Protein	P05198	Eukaryotic translation initiation factor 2 subunit 1 OS=Homo sapiens OX=9606 GN=EIF2S1 PE=1 SV=3	0	7.365	16	4	4	4	1	315	36.1	5.08	6.04	4
FALSE	High	Master Protein	O60884	DnaJ homolog subfamily A member 2 OS=Homo sapiens OX=9606 GN=DNAJA2 PE=1 SV=1	0	7.312	9	4	4	4	1	412	45.7	6.48	7.07	4
FALSE	High	Master Protein	O95486	Protein transport protein Sec24A OS=Homo sapiens OX=9606 GN=SEC24A PE=1 SV=2	0	7.186	5	4	4	4	1	1093	119.7	7.66	6.01	4
FALSE	High	Master Protein	P35268	60S ribosomal protein L22 OS=Homo sapiens OX=9606 GN=RPL22 PE=1 SV=2	0	7.172	21	3	3	3	1	128	14.8	9.19	2.07	3
FALSE	High	Master Protein	P62424	60S ribosomal protein L7a OS=Homo sapiens OX=9606 GN=RPL7A PE=1 SV=2	0	7.164	14	3	3	3	1	266	30	10.61	8.02	3
FALSE	High	Master Protein	P12236	ADP/ATP translocase 3 OS=Homo sapiens OX=9606 GN=SLC25A6 PE=1 SV=4	0	7.101	17	4	4	1	1	298	32.8	9.74	3.94	4
FALSE	High	Master Protein	J3KQN4	60S ribosomal protein L36a OS=Homo sapiens OX=9606 GN=RPL36A PE=1 SV=1	0	7.064	23	3	4	3	1	142	16.4	10.43	2.62	3
FALSE	High	Master Protein	P62750	60S ribosomal protein L23a OS=Homo sapiens OX=9606 GN=RPL23A PE=1 SV=1	0	7.045	20	4	4	4	1	156	17.7	10.45	6.67	4
FALSE	High	Master Protein	P50238	Cysteine-rich protein 1 OS=Homo sapiens OX=9606 GN=CRIP1 PE=1 SV=3	0	6.994	43	4	10	4	1	77	8.5	8.75	9.23	4
FALSE	High	Master Protein	P46783	40S ribosomal protein S10 OS=Homo sapiens OX=9606 GN=RPS10 PE=1 SV=1	0	6.918	33	4	4	4	1	165	18.9	10.15	6.9	4
FALSE	High	Master Protein	P46776	60S ribosomal protein L27a OS=Homo sapiens OX=9606 GN=RPL27A PE=1 SV=2	0	6.887	18	3	4	3	1	148	16.6	11	6.73	3
FALSE	High	Master Protein	A0A075B6G3	Dystrophin OS=Homo sapiens OX=9606 GN=DMD PE=1 SV=1	0	6.831	1	3	4	3	1	3685	426.5	5.9	8.42	3
FALSE	High	Master Protein	P17812	CTP synthase 1 OS=Homo sapiens OX=9606 GN=CTPS1 PE=1 SV=2	0	6.805	9	4	4	4	1	591	66.6	6.46	3.83	4
FALSE	High	Master Protein	P42766	60S ribosomal protein L35 OS=Homo sapiens OX=9606 GN=RPL35 PE=1 SV=2	0	6.773	26	3	5	3	1	123	14.5	11.05	5.83	3
FALSE	High	Master Protein	A0A0B4J220	Chromosome 11 open reading frame 48, isoform CRA_c OS=Homo sapiens OX=9606 GN=C11orf98 PE=1 SV=1	0	6.761	21	2	3	2	1	123	14.2	11.53	6.77	2
FALSE	High	Master Protein	Q96H79	Zinc finger CCCH-type antiviral protein 1-like OS=Homo sapiens OX=9606 GN=ZC3HAV1L PE=1 SV=2	0	6.736	11	2	3	2	1	300	32.9	8.13	2.88	2
FALSE	High	Master Protein	Q7Z794	Keratin, type II cytoskeletal 1b OS=Homo sapiens OX=9606 GN=KRT77 PE=2 SV=3	0	6.629	7	3	7	1	1	578	61.9	5.99	7.32	3
FALSE	High	Master Protein	P62917	60S ribosomal protein L8 OS=Homo sapiens OX=9606 GN=RPL8 PE=1 SV=2	0	6.551	7	2	3	2	1	257	28	11.03	4.22	2
FALSE	High	Master Protein	Q14CN4	Keratin, type II cytoskeletal 72 OS=Homo sapiens OX=9606 GN=KRT72 PE=1 SV=2	0	6.539	6	3	4	1	1	511	55.8	6.89	7.86	3
FALSE	High	Master Protein	P62241	40S ribosomal protein S8 OS=Homo sapiens OX=9606 GN=RPS8 PE=1 SV=2	0	6.459	19	3	4	3	1	208	24.2	10.32	9.56	3
FALSE	High	Master Protein	P49411	Elongation factor Tu, mitochondrial OS=Homo sapiens OX=9606 GN=TUFM PE=1 SV=2	0	6.417	12	4	4	4	1	452	49.5	7.61	6.13	4
FALSE	High	Master Protein	P62266	40S ribosomal protein S23 OS=Homo sapiens OX=9606 GN=RPS23 PE=1 SV=3	0	6.404	22	3	3	3	1	143	15.8	10.49	2.06	3
FALSE	High	Master Protein	Q9NX20	39S ribosomal protein L16, mitochondrial OS=Homo sapiens OX=9606 GN=MRPL16 PE=1 SV=1	0	6.348	9	2	3	2	1	251	28.4	10.13	4.33	2
FALSE	High	Master Protein	E7EQ64	Trypsin-1 OS=Homo sapiens OX=9606 GN=PRSS1 PE=1 SV=1	0	6.342	7	2	16	2	1	261	28.1	7.25	35.53	2
FALSE	High	Master Protein	A0A1B0GTU4	Paxillin OS=Homo sapiens OX=9606 GN=PXN PE=1 SV=1	0	6.216	4	3	3	3	1	1081	115.8	5.64	7.02	3
FALSE	High	Master Protein	Q9BRJ7	Tudor-interacting repair regulator protein OS=Homo sapiens OX=9606 GN=NUDT16L1 PE=1 SV=1	0	6.207	18	3	3	3	1	211	23.3	8.91	3.17	3
FALSE	High	Master Protein	P35659	Protein DEK OS=Homo sapiens OX=9606 GN=DEK PE=1 SV=1	0	6.185	9	3	4	3	1	375	42.6	8.56	6.26	3
FALSE	High	Master Protein	O14497	AT-rich interactive domain-containing protein 1A OS=Homo sapiens OX=9606 GN=ARID1A PE=1 SV=3	0	6.165	3	3	3	3	1	2285	241.9	6.7	7.78	3
FALSE	High	Master Protein	Q5D862	Filaggrin-2 OS=Homo sapiens OX=9606 GN=FLG2 PE=1 SV=1	0	6.146	2	3	3	3	1	2391	247.9	8.31	6.41	3
FALSE	High	Master Protein	P46778	60S ribosomal protein L21 OS=Homo sapiens OX=9606 GN=RPL21 PE=1 SV=2	0	6.133	15	2	3	2	1	160	18.6	10.49	6.56	2
FALSE	High	Master Protein	C9J6P4	Zinc finger CCCH-type antiviral protein 1 OS=Homo sapiens OX=9606 GN=ZC3HAV1 PE=1 SV=1	0	6.097	4	3	3	3	1	1024	114	8.56	4.35	3
FALSE	High	Master Protein	Q9NVS2	39S ribosomal protein S18a, mitochondrial OS=Homo sapiens OX=9606 GN=MRPS18A PE=1 SV=1	0	6.079	16	3	4	3	1	196	22.2	10.33	5.79	3
FALSE	High	Master Protein	Q15796	Mothers against decapentaplegic homolog 2 OS=Homo sapiens OX=9606 GN=SMAD2 PE=1 SV=1	0	5.976	7	3	4	3	1	467	52.3	6.58	7.7	3
FALSE	High	Master Protein	P04792	Heat shock protein beta-1 OS=Homo sapiens OX=9606 GN=HSPB1 PE=1 SV=2	0	5.909	34	4	4	4	1	205	22.8	6.4	8.44	4
FALSE	High	Master Protein	Q08J23	tRNA (cytosine(34)-C(5))-methyltransferase OS=Homo sapiens OX=9606 GN=NSUN2 PE=1 SV=2	0	5.853	5	3	3	3	1	767	86.4	6.77	3.89	3
FALSE	High	Master Protein	P26373	60S ribosomal protein L13 OS=Homo sapiens OX=9606 GN=RPL13 PE=1 SV=4	0	5.819	17	3	3	3	1	211	24.2	11.65	4	3
FALSE	High	Master Protein	O43148	mRNA cap guanine-N7 methyltransferase OS=Homo sapiens OX=9606 GN=RNMT PE=1 SV=1	0	5.789	9	3	3	3	1	476	54.8	6.61	5.79	3
FALSE	High	Master Protein	Q8IXB1	DnaJ homolog subfamily C member 10 OS=Homo sapiens OX=9606 GN=DNAJC10 PE=1 SV=2	0	5.783	3	3	3	3	1	793	91	7.18	3.9	3
FALSE	High	Master Protein	Q13263	Transcription intermediary factor 1-beta OS=Homo sapiens OX=9606 GN=TRIM28 PE=1 SV=5	0	5.761	5	3	4	3	1	835	88.5	5.77	9.54	3
FALSE	High	Master Protein	P61313	60S ribosomal protein L15 OS=Homo sapiens OX=9606 GN=RPL15 PE=1 SV=2	0	5.699	22	4	4	4	1	204	24.1	11.62	2.48	4
FALSE	High	Master Protein	Q1KMD3	Heterogeneous nuclear ribonucleoprotein U-like protein 2 OS=Homo sapiens OX=9606 GN=HNRNPUL2 PE=1 SV=1	0	5.695	5	4	5	4	1	747	85.1	4.91	7.05	4
FALSE	High	Master Protein	Q92626	Peroxidasin homolog OS=Homo sapiens OX=9606 GN=PXDN PE=1 SV=2	0	5.69	5	3	4	3	1	1479	165.2	7.17	8.36	3
FALSE	High	Master Protein	P30050	60S ribosomal protein L12 OS=Homo sapiens OX=9606 GN=RPL12 PE=1 SV=1	0	5.653	24	3	3	3	1	165	17.8	9.42	4.8	3
FALSE	High	Master Protein	Q15654	Thyroid receptor-interacting protein 6 OS=Homo sapiens OX=9606 GN=TRIP6 PE=1 SV=3	0	5.549	4	1	1	1	1	476	50.3	7.37	2.27	1
FALSE	High	Master Protein	Q09666	Neuroblast differentiation-associated protein AHNAK OS=Homo sapiens OX=9606 GN=AHNAK PE=1 SV=2	0	5.529	2	3	3	3	1	5890	628.7	6.15	3.75	3
FALSE	High	Master Protein	P31151	Protein S100-A7 OS=Homo sapiens OX=9606 GN=S100A7 PE=1 SV=4	0	5.47	23	2	3	2	1	101	11.5	6.77	0	2
FALSE	High	Master Protein	P15531	Nucleoside diphosphate kinase A OS=Homo sapiens OX=9606 GN=NME1 PE=1 SV=1	0	5.466	19	2	3	2	1	152	17.1	6.19	6.36	2
FALSE	High	Master Protein	U3KQK0	Histone H2B OS=Homo sapiens OX=9606 GN=HIST1H2BN PE=1 SV=1	0	5.425	12	2	3	2	1	166	18.8	10.54	3.61	2
FALSE	High	Master Protein	Q8N1G4	Leucine-rich repeat-containing protein 47 OS=Homo sapiens OX=9606 GN=LRRC47 PE=1 SV=1	0	5.38	8	3	3	3	1	583	63.4	8.28	9.01	3
FALSE	High	Master Protein	F8W727	60S ribosomal protein L32 OS=Homo sapiens OX=9606 GN=RPL32 PE=1 SV=1	0	5.303	8	1	2	1	1	153	18	10.59	0	1
FALSE	High	Master Protein	Q02878	60S ribosomal protein L6 OS=Homo sapiens OX=9606 GN=RPL6 PE=1 SV=3	0	5.275	11	3	3	3	1	288	32.7	10.58	4.21	3
FALSE	High	Master Protein	A0A0U1RRH7	Histone H2A OS=Homo sapiens OX=9606 PE=3 SV=1	0	5.24	16	2	2	2	1	170	18.5	11.52	5.55	2
FALSE	High	Master Protein	P52292	Importin subunit alpha-1 OS=Homo sapiens OX=9606 GN=KPNA2 PE=1 SV=1	0	5.233	7	2	4	2	1	529	57.8	5.4	8.09	2
FALSE	High	Master Protein	Q9Y446	Plakophilin-3 OS=Homo sapiens OX=9606 GN=PKP3 PE=1 SV=1	0	5.212	7	3	3	3	1	797	87	9.32	4.66	3
FALSE	High	Master Protein	P07737	Profilin-1 OS=Homo sapiens OX=9606 GN=PFN1 PE=1 SV=2	0	5.195	21	2	2	2	1	140	15	8.27	5.11	2
FALSE	High	Master Protein	P27635	60S ribosomal protein L10 OS=Homo sapiens OX=9606 GN=RPL10 PE=1 SV=4	0	5.161	9	2	4	2	1	214	24.6	10.08	6.22	2
FALSE	High	Master Protein	P62244	40S ribosomal protein S15a OS=Homo sapiens OX=9606 GN=RPS15A PE=1 SV=2	0	5.118	14	2	3	2	1	130	14.8	10.13	6.44	2
FALSE	High	Master Protein	Q15436	Protein transport protein Sec23A OS=Homo sapiens OX=9606 GN=SEC23A PE=1 SV=2	0	5.107	5	3	3	2	1	765	86.1	7.08	3.51	3
FALSE	High	Master Protein	P14618	Pyruvate kinase PKM OS=Homo sapiens OX=9606 GN=PKM PE=1 SV=4	0	5.095	6	3	3	3	1	531	57.9	7.84	2.62	3
FALSE	High	Master Protein	Q9BRP1	Programmed cell death protein 2-like OS=Homo sapiens OX=9606 GN=PDCD2L PE=1 SV=1	0	5.089	10	3	3	3	1	358	39.4	4.86	4.31	3
FALSE	High	Master Protein	P63173	60S ribosomal protein L38 OS=Homo sapiens OX=9606 GN=RPL38 PE=1 SV=2	0	5.088	19	1	2	1	1	70	8.2	10.1	5.38	1
FALSE	High	Master Protein	P52597	Heterogeneous nuclear ribonucleoprotein F OS=Homo sapiens OX=9606 GN=HNRNPF PE=1 SV=3	0	5.028	11	3	4	1	1	415	45.6	5.58	2.16	3
FALSE	High	Master Protein	Q92734	Protein TFG OS=Homo sapiens OX=9606 GN=TFG PE=1 SV=2	0	5.017	7	2	3	2	1	400	43.4	5.1	7.36	2
FALSE	High	Master Protein	Q9HCC0	Methylcrotonoyl-CoA carboxylase beta chain, mitochondrial OS=Homo sapiens OX=9606 GN=MCCC2 PE=1 SV=1	0	4.917	5	2	2	2	1	563	61.3	7.68	4.28	2
FALSE	High	Master Protein	P10809	60 kDa heat shock protein, mitochondrial OS=Homo sapiens OX=9606 GN=HSPD1 PE=1 SV=2	0	4.902	5	2	2	2	1	573	61	5.87	4.84	2
FALSE	High	Master Protein	P32119	Peroxiredoxin-2 OS=Homo sapiens OX=9606 GN=PRDX2 PE=1 SV=5	0	4.888	15	2	2	1	1	198	21.9	5.97	3.88	2
FALSE	High	Master Protein	Q8IWC1	MAP7 domain-containing protein 3 OS=Homo sapiens OX=9606 GN=MAP7D3 PE=1 SV=2	0	4.796	2	1	2	1	1	876	98.4	9.32	1.85	1
FALSE	High	Master Protein	J9JIE6	Calcium load-activated calcium channel OS=Homo sapiens OX=9606 GN=TMCO1 PE=1 SV=1	0	4.776	15	3	3	3	1	239	27.1	10.26	2.7	3
FALSE	High	Master Protein	G3V325	ATP5MF-PTCD1 readthrough OS=Homo sapiens OX=9606 GN=ATP5MF-PTCD1 PE=4 SV=1	0	4.596	3	2	3	2	1	749	84.1	8.72	0	2
FALSE	High	Master Protein	Q93052	Lipoma-preferred partner OS=Homo sapiens OX=9606 GN=LPP PE=1 SV=1	0	4.482	8	3	3	3	1	612	65.7	7.37	3.88	3
FALSE	High	Master Protein	A0A024QZP7	Cell division cycle 2, G1 to S and G2 to M, isoform CRA_a OS=Homo sapiens OX=9606 GN=CDK1 PE=1 SV=1	0	4.48	11	3	3	3	1	297	34.1	8.4	3.58	3
FALSE	High	Master Protein	H0Y720	Trinucleotide repeat-containing gene 6B protein (Fragment) OS=Homo sapiens OX=9606 GN=TNRC6B PE=1 SV=1	0	4.461	2	2	2	2	1	1391	148.6	7.27	4.81	2
FALSE	High	Master Protein	Q6PJT7	Zinc finger CCCH domain-containing protein 14 OS=Homo sapiens OX=9606 GN=ZC3H14 PE=1 SV=1	0	4.4	7	3	3	3	1	736	82.8	7.31	4.7	3
FALSE	High	Master Protein	Q9NUI1	Peroxisomal 2,4-dienoyl-CoA reductase OS=Homo sapiens OX=9606 GN=DECR2 PE=1 SV=1	0	4.371	8	2	2	2	1	292	30.8	9.22	2.43	2
FALSE	High	Master Protein	Q13112	Chromatin assembly factor 1 subunit B OS=Homo sapiens OX=9606 GN=CHAF1B PE=1 SV=1	0	4.327	7	3	3	3	1	559	61.5	7.5	3.65	3
FALSE	High	Master Protein	Q15366	Poly(rC)-binding protein 2 OS=Homo sapiens OX=9606 GN=PCBP2 PE=1 SV=1	0	4.315	7	2	2	1	1	365	38.6	6.79	4.89	2
FALSE	High	Master Protein	Q15365	Poly(rC)-binding protein 1 OS=Homo sapiens OX=9606 GN=PCBP1 PE=1 SV=2	0	4.264	13	3	3	3	1	356	37.5	7.09	4.55	3
FALSE	High	Master Protein	P62805	Histone H4 OS=Homo sapiens OX=9606 GN=HIST1H4A PE=1 SV=2	0	4.249	19	2	3	2	1	103	11.4	11.36	4.61	2
FALSE	High	Master Protein	Q9BU76	Multiple myeloma tumor-associated protein 2 OS=Homo sapiens OX=9606 GN=MMTAG2 PE=1 SV=1	0	4.219	10	2	2	2	1	263	29.4	10.02	4.18	2
FALSE	High	Master Protein	P26641	Elongation factor 1-gamma OS=Homo sapiens OX=9606 GN=EEF1G PE=1 SV=3	0	4.207	5	2	2	2	1	437	50.1	6.67	0	2
FALSE	High	Master Protein	P47914	60S ribosomal protein L29 OS=Homo sapiens OX=9606 GN=RPL29 PE=1 SV=2	0	4.189	14	2	2	2	1	159	17.7	11.66	0	2
FALSE	High	Master Protein	P69905	Hemoglobin subunit alpha OS=Homo sapiens OX=9606 GN=HBA1 PE=1 SV=2	0	4.185	19	2	2	2	1	142	15.2	8.68	4.16	2
FALSE	High	Master Protein	I3L504	Eukaryotic translation initiation factor 5A-1 OS=Homo sapiens OX=9606 GN=EIF5A PE=1 SV=1	0	4.179	11	2	3	2	1	186	20.5	5.25	1.8	2
FALSE	High	Master Protein	O75616	GTPase Era, mitochondrial OS=Homo sapiens OX=9606 GN=ERAL1 PE=1 SV=2	0	4.122	6	2	2	2	1	437	48.3	8.84	4.37	2
FALSE	High	Master Protein	P00338	L-lactate dehydrogenase A chain OS=Homo sapiens OX=9606 GN=LDHA PE=1 SV=2	0	4.092	7	2	3	2	1	332	36.7	8.27	7.09	2
FALSE	High	Master Protein	P34897	Serine hydroxymethyltransferase, mitochondrial OS=Homo sapiens OX=9606 GN=SHMT2 PE=1 SV=3	0	4.025	5	2	2	2	1	504	56	8.53	3.93	2
FALSE	High	Master Protein	Q02543	60S ribosomal protein L18a OS=Homo sapiens OX=9606 GN=RPL18A PE=1 SV=2	0	4.024	18	3	3	3	1	176	20.7	10.71	4.11	3
FALSE	High	Master Protein	P25398	40S ribosomal protein S12 OS=Homo sapiens OX=9606 GN=RPS12 PE=1 SV=3	0	4.021	19	2	2	2	1	132	14.5	7.21	4.67	2
FALSE	High	Master Protein	P57721	Poly(rC)-binding protein 3 OS=Homo sapiens OX=9606 GN=PCBP3 PE=2 SV=2	0	4.007	7	2	2	1	1	371	39.4	8.07	4.95	2
FALSE	High	Master Protein	Q6UWP8	Suprabasin OS=Homo sapiens OX=9606 GN=SBSN PE=1 SV=2	0	3.97	9	1	1	1	1	590	60.5	7.01	2.85	1
FALSE	High	Master Protein	P61353	60S ribosomal protein L27 OS=Homo sapiens OX=9606 GN=RPL27 PE=1 SV=2	0	3.956	21	3	3	3	1	136	15.8	10.56	2.43	3
FALSE	High	Master Protein	A0A2R8Y422	Uncharacterized protein OS=Homo sapiens OX=9606 PE=4 SV=1	0	3.946	17	3	3	3	1	156	18	9.47	2.07	3
FALSE	High	Master Protein	Q13492	Phosphatidylinositol-binding clathrin assembly protein OS=Homo sapiens OX=9606 GN=PICALM PE=1 SV=2	0	3.923	4	2	2	2	1	652	70.7	7.9	3.94	2
FALSE	High	Master Protein	P61513	60S ribosomal protein L37a OS=Homo sapiens OX=9606 GN=RPL37A PE=1 SV=2	0	3.893	23	2	2	2	1	92	10.3	10.43	3.85	2
FALSE	High	Master Protein	P36542	ATP synthase subunit gamma, mitochondrial OS=Homo sapiens OX=9606 GN=ATP5F1C PE=1 SV=1	0	3.828	8	2	2	2	1	298	33	9.22	3.73	2
FALSE	High	Master Protein	O95470	Sphingosine-1-phosphate lyase 1 OS=Homo sapiens OX=9606 GN=SGPL1 PE=1 SV=3	0	3.79	7	3	3	3	1	568	63.5	9.16	1.87	3
FALSE	High	Master Protein	B7Z6Z4	cDNA FLJ56329, highly similar to Myosin light polypeptide 6 OS=Homo sapiens OX=9606 GN=MYL6 PE=1 SV=1	0	3.706	11	2	2	2	1	238	26.7	5.08	1.75	2
FALSE	High	Master Protein	O15479	Melanoma-associated antigen B2 OS=Homo sapiens OX=9606 GN=MAGEB2 PE=1 SV=3	0	3.667	5	1	1	1	1	319	35.3	8.76	1.69	1
FALSE	High	Master Protein	C9JF46	LIM and senescent cell antigen-like-containing domain protein 1 (Fragment) OS=Homo sapiens OX=9606 GN=LIMS1 PE=1 SV=8	0	3.663	20	2	2	1	1	176	19.9	6.96	2.7	2
FALSE	High	Master Protein	A0A0J9YXC7	LIM and senescent cell antigen-like-containing domain protein OS=Homo sapiens OX=9606 GN=LIMS4 PE=1 SV=1	0	3.644	6	2	2	1	1	398	45.7	7.88	1.94	2
FALSE	High	Master Protein	P20618	Proteasome subunit beta type-1 OS=Homo sapiens OX=9606 GN=PSMB1 PE=1 SV=2	0	3.564	7	2	2	2	1	241	26.5	8.13	1.76	2
FALSE	High	Master Protein	Q8NC51	Plasminogen activator inhibitor 1 RNA-binding protein OS=Homo sapiens OX=9606 GN=SERBP1 PE=1 SV=2	0	3.562	6	2	2	2	1	408	44.9	8.65	0	2
FALSE	High	Master Protein	Q6DD87	Zinc finger protein 787 OS=Homo sapiens OX=9606 GN=ZNF787 PE=1 SV=4	0	3.549	7	2	2	2	1	382	40.4	7.96	2.68	2
FALSE	High	Master Protein	P16401	Histone H1.5 OS=Homo sapiens OX=9606 GN=HIST1H1B PE=1 SV=3	0	3.539	6	2	2	2	1	226	22.6	10.92	2.97	2
FALSE	High	Master Protein	E7ERK9	Translation initiation factor eIF-2B subunit delta OS=Homo sapiens OX=9606 GN=EIF2B4 PE=1 SV=1	0	3.52	6	2	2	2	1	544	59.7	9.42	2.1	2
FALSE	High	Master Protein	Q05519	Serine/arginine-rich splicing factor 11 OS=Homo sapiens OX=9606 GN=SRSF11 PE=1 SV=1	0	3.48	3	1	2	1	1	484	53.5	10.52	2.11	1
FALSE	High	Master Protein	Q13501	Sequestosome-1 OS=Homo sapiens OX=9606 GN=SQSTM1 PE=1 SV=1	0	3.459	4	1	2	1	1	440	47.7	5.22	5.42	1
FALSE	High	Master Protein	E9PR30	40S ribosomal protein S30 OS=Homo sapiens OX=9606 GN=FAU PE=1 SV=1	0	3.455	11	2	2	2	1	98	10.9	11.56	2.11	2
FALSE	High	Master Protein	P21912	Succinate dehydrogenase [ubiquinone] iron-sulfur subunit, mitochondrial OS=Homo sapiens OX=9606 GN=SDHB PE=1 SV=3	0	3.454	7	2	2	2	1	280	31.6	8.76	3.91	2
FALSE	High	Master Protein	O75955	Flotillin-1 OS=Homo sapiens OX=9606 GN=FLOT1 PE=1 SV=3	0	3.453	6	2	2	2	1	427	47.3	7.49	0	2
FALSE	High	Master Protein	P06748	Nucleophosmin OS=Homo sapiens OX=9606 GN=NPM1 PE=1 SV=2	0	3.428	10	2	3	2	1	294	32.6	4.78	4.8	2
FALSE	High	Master Protein	Q6IPX4	40S ribosomal protein S16 OS=Homo sapiens OX=9606 GN=RPS16 PE=1 SV=1	0	3.386	13	2	2	2	1	152	17.1	10.96	2.03	2
FALSE	High	Master Protein	Q7L7X3	Serine/threonine-protein kinase TAO1 OS=Homo sapiens OX=9606 GN=TAOK1 PE=1 SV=1	0	3.365	3	3	3	3	1	1001	116	7.65	3.83	3
FALSE	High	Master Protein	J3KQE5	GTP-binding nuclear protein Ran (Fragment) OS=Homo sapiens OX=9606 GN=RAN PE=1 SV=1	0	3.349	9	2	2	2	1	234	26.8	9.58	0	2
FALSE	High	Master Protein	Q10471	Polypeptide N-acetylgalactosaminyltransferase 2 OS=Homo sapiens OX=9606 GN=GALNT2 PE=1 SV=1	0	3.345	5	2	2	2	1	571	64.7	8.35	4.59	2
FALSE	High	Master Protein	P61221	ATP-binding cassette sub-family E member 1 OS=Homo sapiens OX=9606 GN=ABCE1 PE=1 SV=1	0	3.336	5	2	2	2	1	599	67.3	8.34	2.3	2
FALSE	High	Master Protein	P62888	60S ribosomal protein L30 OS=Homo sapiens OX=9606 GN=RPL30 PE=1 SV=2	0	3.33	27	2	2	2	1	115	12.8	9.63	2.13	2
FALSE	High	Master Protein	P05388	60S acidic ribosomal protein P0 OS=Homo sapiens OX=9606 GN=RPLP0 PE=1 SV=1	0	3.305	7	2	2	2	1	317	34.3	5.97	3.59	2
FALSE	High	Master Protein	P83731	60S ribosomal protein L24 OS=Homo sapiens OX=9606 GN=RPL24 PE=1 SV=1	0	3.299	8	1	1	1	1	157	17.8	11.25	2.41	1
FALSE	High	Master Protein	Q8WX93	Palladin OS=Homo sapiens OX=9606 GN=PALLD PE=1 SV=3	0	3.281	2	2	2	2	1	1383	150.5	7.09	2.11	2
FALSE	High	Master Protein	Q5T749	Keratinocyte proline-rich protein OS=Homo sapiens OX=9606 GN=KPRP PE=1 SV=1	0	3.234	4	1	1	1	1	579	64.1	8.27	2.72	1
FALSE	High	Master Protein	P05109	Protein S100-A8 OS=Homo sapiens OX=9606 GN=S100A8 PE=1 SV=1	0	3.217	25	2	2	2	1	93	10.8	7.03	1.64	2
FALSE	High	Master Protein	P18124	60S ribosomal protein L7 OS=Homo sapiens OX=9606 GN=RPL7 PE=1 SV=1	0	3.209	7	2	2	2	1	248	29.2	10.65	3.56	2
FALSE	High	Master Protein	P56270	Myc-associated zinc finger protein OS=Homo sapiens OX=9606 GN=MAZ PE=1 SV=1	0	3.208	6	2	2	2	1	477	48.6	8.95	1.64	2
FALSE	High	Master Protein	P84098	60S ribosomal protein L19 OS=Homo sapiens OX=9606 GN=RPL19 PE=1 SV=1	0	3.167	9	2	2	2	1	196	23.5	11.47	3.82	2
FALSE	High	Master Protein	P25786	Proteasome subunit alpha type-1 OS=Homo sapiens OX=9606 GN=PSMA1 PE=1 SV=1	0	3.151	6	2	2	2	1	263	29.5	6.61	1.66	2
FALSE	High	Master Protein	Q08554	Desmocollin-1 OS=Homo sapiens OX=9606 GN=DSC1 PE=1 SV=2	0	3.147	3	2	2	2	1	894	99.9	5.43	5.11	2
FALSE	High	Master Protein	A0A0A0MQX8	Muscleblind-like protein 1 OS=Homo sapiens OX=9606 GN=MBNL1 PE=1 SV=1	0	3.143	8	2	2	2	1	400	43	8.82	4.5	2
FALSE	High	Master Protein	P58107	Epiplakin OS=Homo sapiens OX=9606 GN=EPPK1 PE=1 SV=3	0	3.133	3	1	1	1	1	5088	555.3	5.62	2.56	1
FALSE	High	Master Protein	P20042	Eukaryotic translation initiation factor 2 subunit 2 OS=Homo sapiens OX=9606 GN=EIF2S2 PE=1 SV=2	0	3.12	6	2	2	2	1	333	38.4	5.8	0	2
FALSE	High	Master Protein	P09669	Cytochrome c oxidase subunit 6C OS=Homo sapiens OX=9606 GN=COX6C PE=1 SV=2	0	3.112	24	2	2	2	1	75	8.8	10.39	4.15	2
FALSE	High	Master Protein	V9GYM8	Rho guanine nucleotide exchange factor 2 OS=Homo sapiens OX=9606 GN=ARHGEF2 PE=1 SV=1	0	3.096	2	2	2	2	1	1031	116	7.37	3.89	2
FALSE	High	Master Protein	Q9UPN9	E3 ubiquitin-protein ligase TRIM33 OS=Homo sapiens OX=9606 GN=TRIM33 PE=1 SV=3	0	3.089	2	2	2	2	1	1127	122.5	6.67	2.12	2
FALSE	High	Master Protein	Q99714	3-hydroxyacyl-CoA dehydrogenase type-2 OS=Homo sapiens OX=9606 GN=HSD17B10 PE=1 SV=3	0	3.072	12	2	2	2	1	261	26.9	7.78	4.31	2
FALSE	High	Master Protein	P06702	Protein S100-A9 OS=Homo sapiens OX=9606 GN=S100A9 PE=1 SV=1	0	3.059	11	1	2	1	1	114	13.2	6.13	0	1
FALSE	High	Master Protein	P53396	ATP-citrate synthase OS=Homo sapiens OX=9606 GN=ACLY PE=1 SV=3	0	3.037	2	2	2	2	1	1101	120.8	7.33	1.94	2
FALSE	High	Master Protein	Q9BVP2	Guanine nucleotide-binding protein-like 3 OS=Homo sapiens OX=9606 GN=GNL3 PE=1 SV=2	0	3.02	4	2	2	2	1	549	62	9.16	4.09	2
FALSE	High	Master Protein	P07814	Bifunctional glutamate/proline--tRNA ligase OS=Homo sapiens OX=9606 GN=EPRS PE=1 SV=5	0	2.98	2	2	2	2	1	1512	170.5	7.33	2.87	2
FALSE	High	Master Protein	Q8N3E9	1-phosphatidylinositol 4,5-bisphosphate phosphodiesterase delta-3 OS=Homo sapiens OX=9606 GN=PLCD3 PE=1 SV=3	0	2.971	3	2	2	2	1	789	89.2	6.98	2.63	2
FALSE	High	Master Protein	P40926	Malate dehydrogenase, mitochondrial OS=Homo sapiens OX=9606 GN=MDH2 PE=1 SV=3	0	2.833	3	1	1	1	1	338	35.5	8.68	2.16	1
FALSE	High	Master Protein	P12273	Prolactin-inducible protein OS=Homo sapiens OX=9606 GN=PIP PE=1 SV=1	0	2.829	8	1	1	1	1	146	16.6	8.05	2.49	1
FALSE	High	Master Protein	O60716	Catenin delta-1 OS=Homo sapiens OX=9606 GN=CTNND1 PE=1 SV=1	0	2.818	3	2	2	2	1	968	108.1	6.23	4.3	2
FALSE	High	Master Protein	Q14498	RNA-binding protein 39 OS=Homo sapiens OX=9606 GN=RBM39 PE=1 SV=2	0	2.796	4	2	2	2	1	530	59.3	10.1	3.63	2
FALSE	High	Master Protein	Q13835	Plakophilin-1 OS=Homo sapiens OX=9606 GN=PKP1 PE=1 SV=2	0	2.795	2	1	2	1	1	747	82.8	9.13	3.78	1
FALSE	High	Master Protein	P26358	DNA (cytosine-5)-methyltransferase 1 OS=Homo sapiens OX=9606 GN=DNMT1 PE=1 SV=2	0	2.758	1	2	2	2	1	1616	183.1	7.75	0	2
FALSE	High	Master Protein	A0A0D9SGE8	PHD finger protein 6 OS=Homo sapiens OX=9606 GN=PHF6 PE=1 SV=1	0	2.718	6	2	2	2	1	366	41.3	8.68	1.86	2
FALSE	High	Master Protein	P13639	Elongation factor 2 OS=Homo sapiens OX=9606 GN=EEF2 PE=1 SV=4	0	2.705	3	2	2	2	1	858	95.3	6.83	1.89	2
FALSE	High	Master Protein	Q08211	ATP-dependent RNA helicase A OS=Homo sapiens OX=9606 GN=DHX9 PE=1 SV=4	0	2.704	1	1	1	1	1	1270	140.9	6.84	0	1
FALSE	High	Master Protein	A0A2R8YD14	40S ribosomal protein S24 OS=Homo sapiens OX=9606 GN=RPS24 PE=1 SV=1	0	2.664	7	1	2	1	1	165	19.2	10.98	2.31	1
FALSE	High	Master Protein	P00558	Phosphoglycerate kinase 1 OS=Homo sapiens OX=9606 GN=PGK1 PE=1 SV=3	0	2.662	8	2	2	2	1	417	44.6	8.1	4.67	2
FALSE	High	Master Protein	Q96IJ6	Mannose-1-phosphate guanyltransferase alpha OS=Homo sapiens OX=9606 GN=GMPPA PE=1 SV=1	0	2.659	4	1	1	1	1	420	46.3	7.21	2.08	1
FALSE	High	Master Protein	P08047	Transcription factor Sp1 OS=Homo sapiens OX=9606 GN=SP1 PE=1 SV=3	0	2.635	1	2	2	2	1	785	80.6	7.34	2.19	2
FALSE	High	Master Protein	Q9Y305	Acyl-coenzyme A thioesterase 9, mitochondrial OS=Homo sapiens OX=9606 GN=ACOT9 PE=1 SV=2	0	2.584	3	1	1	1	1	439	49.9	8.6	2.24	1
FALSE	High	Master Protein	P62857	40S ribosomal protein S28 OS=Homo sapiens OX=9606 GN=RPS28 PE=1 SV=1	0	2.576	16	1	2	1	1	69	7.8	10.7	3.83	1
FALSE	High	Master Protein	Q9Y5X2	Sorting nexin-8 OS=Homo sapiens OX=9606 GN=SNX8 PE=1 SV=1	0	2.569	3	1	1	1	1	465	52.5	7.39	3.07	1
FALSE	High	Master Protein	P53597	Succinate--CoA ligase [ADP/GDP-forming] subunit alpha, mitochondrial OS=Homo sapiens OX=9606 GN=SUCLG1 PE=1 SV=4	0	2.558	4	1	1	1	1	346	36.2	8.79	2.37	1
FALSE	High	Master Protein	P62851	40S ribosomal protein S25 OS=Homo sapiens OX=9606 GN=RPS25 PE=1 SV=1	0	2.558	10	1	1	1	1	125	13.7	10.11	2.54	1
FALSE	High	Master Protein	P60174	Triosephosphate isomerase OS=Homo sapiens OX=9606 GN=TPI1 PE=1 SV=3	0	2.557	4	1	1	1	1	286	30.8	5.92	2.09	1
FALSE	High	Master Protein	P11498	Pyruvate carboxylase, mitochondrial OS=Homo sapiens OX=9606 GN=PC PE=1 SV=2	0	2.534	3	2	2	2	1	1178	129.6	6.84	2.86	2
FALSE	High	Master Protein	P05783	Keratin, type I cytoskeletal 18 OS=Homo sapiens OX=9606 GN=KRT18 PE=1 SV=2	0	2.532	4	2	6	1	1	430	48	5.45	5.3	2
FALSE	High	Master Protein	Q2VIQ3	Chromosome-associated kinesin KIF4B OS=Homo sapiens OX=9606 GN=KIF4B PE=2 SV=2	0	2.499	1	1	1	1	1	1234	139.9	6.18	1.87	1
FALSE	High	Master Protein	P05204	Non-histone chromosomal protein HMG-17 OS=Homo sapiens OX=9606 GN=HMGN2 PE=1 SV=3	0	2.492	17	1	1	1	1	90	9.4	9.99	0	1
FALSE	High	Master Protein	Q9P258	Protein RCC2 OS=Homo sapiens OX=9606 GN=RCC2 PE=1 SV=2	0	2.456	5	2	2	2	1	522	56	8.78	2.57	2
FALSE	High	Master Protein	Q8NE86	Calcium uniporter protein, mitochondrial OS=Homo sapiens OX=9606 GN=MCU PE=1 SV=1	0	2.436	3	1	1	1	1	351	39.8	8.65	2.6	1
FALSE	High	Master Protein	Q9H061	Transmembrane protein 126A OS=Homo sapiens OX=9606 GN=TMEM126A PE=1 SV=1	0	2.433	7	1	1	1	1	195	21.5	9.26	2.14	1
FALSE	High	Master Protein	E9PFW3	AP-2 complex subunit mu OS=Homo sapiens OX=9606 GN=AP2M1 PE=1 SV=1	0	2.431	6	2	2	2	1	460	52.3	9.5	4.34	2
FALSE	High	Master Protein	A0A0A6YYL4	Coronin OS=Homo sapiens OX=9606 GN=CORO7-PAM16 PE=3 SV=1	0	2.4	1	1	1	1	1	1048	114.1	6.33	3.03	1
FALSE	High	Master Protein	E9PK25	Cofilin-1 OS=Homo sapiens OX=9606 GN=CFL1 PE=1 SV=1	0	2.36	7	1	1	1	1	204	22.7	8.34	2.97	1
FALSE	High	Master Protein	Q7Z5J4	Retinoic acid-induced protein 1 OS=Homo sapiens OX=9606 GN=RAI1 PE=1 SV=2	0	2.341	1	1	1	1	1	1906	203.2	8.79	0	1
FALSE	High	Master Protein	P80723	Brain acid soluble protein 1 OS=Homo sapiens OX=9606 GN=BASP1 PE=1 SV=2	0	2.339	12	2	2	2	1	227	22.7	4.63	0	2
FALSE	High	Master Protein	Q16795	NADH dehydrogenase [ubiquinone] 1 alpha subcomplex subunit 9, mitochondrial OS=Homo sapiens OX=9606 GN=NDUFA9 PE=1 SV=2	0	2.337	3	1	1	1	1	377	42.5	9.8	1.63	1
FALSE	High	Master Protein	A0A087WZE9	High mobility group nucleosome-binding domain-containing protein 3 OS=Homo sapiens OX=9606 GN=HMGN3 PE=1 SV=1	0	2.33	12	1	1	1	1	130	13.9	9.91	0	1
FALSE	High	Master Protein	Q96GA3	Protein LTV1 homolog OS=Homo sapiens OX=9606 GN=LTV1 PE=1 SV=1	0	2.328	4	2	2	2	1	475	54.8	4.91	1.75	2
FALSE	High	Master Protein	P52294	Importin subunit alpha-5 OS=Homo sapiens OX=9606 GN=KPNA1 PE=1 SV=3	0	2.32	3	1	1	1	1	538	60.2	5.01	0	1
FALSE	High	Master Protein	O14602	Eukaryotic translation initiation factor 1A, Y-chromosomal OS=Homo sapiens OX=9606 GN=EIF1AY PE=1 SV=4	0	2.308	10	1	1	1	1	144	16.4	5.24	2.38	1
FALSE	High	Master Protein	P62854	40S ribosomal protein S26 OS=Homo sapiens OX=9606 GN=RPS26 PE=1 SV=3	0	2.283	10	1	1	1	1	115	13	11	2.19	1
FALSE	High	Master Protein	Q2NL82	Pre-rRNA-processing protein TSR1 homolog OS=Homo sapiens OX=9606 GN=TSR1 PE=1 SV=1	0	2.268	1	1	1	1	1	804	91.8	7.42	2.2	1
FALSE	High	Master Protein	Q96LD4	E3 ubiquitin-protein ligase TRIM47 OS=Homo sapiens OX=9606 GN=TRIM47 PE=1 SV=2	0	2.263	2	1	1	1	1	638	69.5	6.44	2.13	1
FALSE	High	Master Protein	Q01469	Fatty acid-binding protein 5 OS=Homo sapiens OX=9606 GN=FABP5 PE=1 SV=3	0	2.252	10	1	1	1	1	135	15.2	7.01	2.34	1
FALSE	High	Master Protein	J3QLS3	28S ribosomal protein S7, mitochondrial OS=Homo sapiens OX=9606 GN=MRPS7 PE=1 SV=1	0	2.244	4	1	1	1	1	271	31.7	9.86	0	1
FALSE	High	Master Protein	P00403	Cytochrome c oxidase subunit 2 OS=Homo sapiens OX=9606 GN=MT-CO2 PE=1 SV=1	0	2.237	4	1	1	1	1	227	25.5	4.82	2.18	1
FALSE	High	Master Protein	Q6P1L8	39S ribosomal protein L14, mitochondrial OS=Homo sapiens OX=9606 GN=MRPL14 PE=1 SV=1	0	2.229	7	1	1	1	1	145	15.9	10.24	2.21	1
FALSE	High	Master Protein	A0A024R6I7	Alpha-1-antitrypsin OS=Homo sapiens OX=9606 GN=SERPINA1 PE=1 SV=1	0	2.202	6	1	1	1	1	418	46.7	5.59	4.06	1
FALSE	High	Master Protein	P15927	Replication protein A 32 kDa subunit OS=Homo sapiens OX=9606 GN=RPA2 PE=1 SV=1	0	2.2	6	1	1	1	1	270	29.2	6.15	2.53	1
FALSE	High	Master Protein	H0YKD8	60S ribosomal protein L28 OS=Homo sapiens OX=9606 GN=RPL28 PE=1 SV=1	0	2.193	11	2	2	2	1	170	19.1	11.46	1.71	2
FALSE	High	Master Protein	P0C7P0	CDGSH iron-sulfur domain-containing protein 3, mitochondrial OS=Homo sapiens OX=9606 GN=CISD3 PE=1 SV=1	0	2.191	9	1	1	1	1	127	14.2	10.55	0	1
FALSE	High	Master Protein	P21127	Cyclin-dependent kinase 11B OS=Homo sapiens OX=9606 GN=CDK11B PE=1 SV=4	0	2.164	3	2	2	2	1	795	92.6	5.54	0	2
FALSE	High	Master Protein	Q13671	Ras and Rab interactor 1 OS=Homo sapiens OX=9606 GN=RIN1 PE=1 SV=4	0	2.154	2	1	1	1	1	783	84	8.02	2.61	1
FALSE	High	Master Protein	Q9P1Z2	Calcium-binding and coiled-coil domain-containing protein 1 OS=Homo sapiens OX=9606 GN=CALCOCO1 PE=1 SV=2	0	2.136	2	1	1	1	1	691	77.3	4.82	2.22	1
FALSE	High	Master Protein	P50416	Carnitine O-palmitoyltransferase 1, liver isoform OS=Homo sapiens OX=9606 GN=CPT1A PE=1 SV=2	0	2.108	2	1	1	1	1	773	88.3	8.65	0	1
FALSE	High	Master Protein	O95544	NAD kinase OS=Homo sapiens OX=9606 GN=NADK PE=1 SV=1	0	2.106	3	1	1	1	1	446	49.2	6.47	1.74	1
FALSE	High	Master Protein	P14625	Endoplasmin OS=Homo sapiens OX=9606 GN=HSP90B1 PE=1 SV=1	0	2.088	2	2	2	2	1	803	92.4	4.84	0	2
FALSE	High	Master Protein	P42166	Lamina-associated polypeptide 2, isoform alpha OS=Homo sapiens OX=9606 GN=TMPO PE=1 SV=2	0	2.087	2	1	1	1	1	694	75.4	7.66	0	1
FALSE	High	Master Protein	M0QYS1	60S ribosomal protein L13a (Fragment) OS=Homo sapiens OX=9606 GN=RPL13A PE=1 SV=2	0	2.074	9	2	2	2	1	210	24.2	10.86	0	2
FALSE	High	Master Protein	P78371	T-complex protein 1 subunit beta OS=Homo sapiens OX=9606 GN=CCT2 PE=1 SV=4	0	2.069	3	1	1	1	1	535	57.5	6.46	1.82	1
FALSE	High	Master Protein	P12004	Proliferating cell nuclear antigen OS=Homo sapiens OX=9606 GN=PCNA PE=1 SV=1	0	2.069	6	1	1	1	1	261	28.8	4.69	2.27	1
FALSE	High	Master Protein	P14174	Macrophage migration inhibitory factor OS=Homo sapiens OX=9606 GN=MIF PE=1 SV=4	0	2.06	8	1	1	1	1	115	12.5	7.88	0	1
FALSE	High	Master Protein	P28482	Mitogen-activated protein kinase 1 OS=Homo sapiens OX=9606 GN=MAPK1 PE=1 SV=3	0	2.046	4	2	2	2	1	360	41.4	6.98	0	2
FALSE	High	Master Protein	P20073	Annexin A7 OS=Homo sapiens OX=9606 GN=ANXA7 PE=1 SV=3	0	2.035	2	1	1	1	1	488	52.7	5.68	1.79	1
FALSE	High	Master Protein	P78386	Keratin, type II cuticular Hb5 OS=Homo sapiens OX=9606 GN=KRT85 PE=1 SV=1	0	2.032	2	1	1	1	1	507	55.8	6.55	2.08	1
FALSE	High	Master Protein	O75116	Rho-associated protein kinase 2 OS=Homo sapiens OX=9606 GN=ROCK2 PE=1 SV=4	0	2.022	1	1	1	1	1	1388	160.8	6.02	0	1
FALSE	High	Master Protein	J3KPP4	Cisplatin resistance-associated overexpressed protein, isoform CRA_b OS=Homo sapiens OX=9606 GN=LUC7L3 PE=1 SV=1	0	2.021	4	1	1	1	1	489	58.2	9.92	2.66	1
FALSE	High	Master Protein	O14684	Prostaglandin E synthase OS=Homo sapiens OX=9606 GN=PTGES PE=1 SV=2	0	2.008	7	1	1	1	1	152	17.1	9.5	2.05	1
FALSE	High	Master Protein	Q14232	Translation initiation factor eIF-2B subunit alpha OS=Homo sapiens OX=9606 GN=EIF2B1 PE=1 SV=1	0	1.958	4	1	1	1	1	305	33.7	7.33	2.1	1
FALSE	High	Master Protein	Q16658	Fascin OS=Homo sapiens OX=9606 GN=FSCN1 PE=1 SV=3	0	1.947	3	1	1	1	1	493	54.5	7.24	1.63	1
FALSE	High	Master Protein	P35625	Metalloproteinase inhibitor 3 OS=Homo sapiens OX=9606 GN=TIMP3 PE=1 SV=2	0	1.942	5	1	1	1	1	211	24.1	8.72	1.8	1
FALSE	High	Master Protein	J3KPS3	Fructose-bisphosphate aldolase OS=Homo sapiens OX=9606 GN=ALDOA PE=1 SV=1	0	1.941	3	1	1	1	1	368	39.8	8.09	2.14	1
FALSE	High	Master Protein	Q969X5	Endoplasmic reticulum-Golgi intermediate compartment protein 1 OS=Homo sapiens OX=9606 GN=ERGIC1 PE=1 SV=1	0	1.941	3	1	1	1	1	290	32.6	7.06	2.17	1
FALSE	High	Master Protein	Q9BV20	Methylthioribose-1-phosphate isomerase OS=Homo sapiens OX=9606 GN=MRI1 PE=1 SV=1	0	1.934	4	1	1	1	1	369	39.1	6.3	2.11	1
FALSE	High	Master Protein	P63167	Dynein light chain 1, cytoplasmic OS=Homo sapiens OX=9606 GN=DYNLL1 PE=1 SV=1	0	1.928	12	1	1	1	1	89	10.4	7.4	1.78	1
FALSE	High	Master Protein	P09211	Glutathione S-transferase P OS=Homo sapiens OX=9606 GN=GSTP1 PE=1 SV=2	0.002	1.914	10	1	1	1	1	210	23.3	5.64	2.47	1
FALSE	High	Master Protein	Q13111	Chromatin assembly factor 1 subunit A OS=Homo sapiens OX=9606 GN=CHAF1A PE=1 SV=3	0.002	1.91	1	1	1	1	1	956	106.8	5.94	1.65	1
FALSE	High	Master Protein	Q96S99	Pleckstrin homology domain-containing family F member 1 OS=Homo sapiens OX=9606 GN=PLEKHF1 PE=1 SV=3	0.002	1.903	4	1	1	1	1	279	31.2	8.24	0	1
FALSE	High	Master Protein	P63010	AP-2 complex subunit beta OS=Homo sapiens OX=9606 GN=AP2B1 PE=1 SV=1	0.002	1.902	1	1	1	1	1	937	104.5	5.38	0	1
FALSE	High	Master Protein	Q92522	Histone H1x OS=Homo sapiens OX=9606 GN=H1FX PE=1 SV=1	0.002	1.891	7	1	1	1	1	213	22.5	10.76	2.07	1
FALSE	High	Master Protein	O95429	BAG family molecular chaperone regulator 4 OS=Homo sapiens OX=9606 GN=BAG4 PE=1 SV=1	0.002	1.886	8	2	2	2	1	457	49.6	5.12	2.61	2
FALSE	High	Master Protein	A0A2U3TZU2	Glucose-6-phosphate isomerase OS=Homo sapiens OX=9606 GN=GPI PE=1 SV=1	0.002	1.885	3	1	1	1	1	597	67.2	8.97	2.05	1
FALSE	High	Master Protein	Q53GQ0	Very-long-chain 3-oxoacyl-CoA reductase OS=Homo sapiens OX=9606 GN=HSD17B12 PE=1 SV=2	0.002	1.874	4	1	1	1	1	312	34.3	9.32	2.61	1
FALSE	High	Master Protein	P31274	Homeobox protein Hox-C9 OS=Homo sapiens OX=9606 GN=HOXC9 PE=1 SV=3	0.002	1.87	8	1	1	1	1	260	29.2	9.04	0	1
FALSE	High	Master Protein	Q9HCM4	Band 4.1-like protein 5 OS=Homo sapiens OX=9606 GN=EPB41L5 PE=1 SV=3	0.002	1.869	2	1	1	1	1	733	81.8	6.58	1.84	1
FALSE	High	Master Protein	Q13148	TAR DNA-binding protein 43 OS=Homo sapiens OX=9606 GN=TARDBP PE=1 SV=1	0.002	1.863	4	1	1	1	1	414	44.7	6.19	2.95	1
FALSE	High	Master Protein	Q9UKX2	Myosin-2 OS=Homo sapiens OX=9606 GN=MYH2 PE=1 SV=1	0.002	1.86	1	1	1	1	1	1941	222.9	5.82	2.03	1
FALSE	High	Master Protein	P46940	Ras GTPase-activating-like protein IQGAP1 OS=Homo sapiens OX=9606 GN=IQGAP1 PE=1 SV=1	0.002	1.785	1	1	1	1	1	1657	189.1	6.48	1.69	1
FALSE	High	Master Protein	Q9C037	E3 ubiquitin-protein ligase TRIM4 OS=Homo sapiens OX=9606 GN=TRIM4 PE=1 SV=2	0.001	1.782	3	1	1	1	1	500	57.4	8.1	1.9	1
FALSE	High	Master Protein	P61626	Lysozyme C OS=Homo sapiens OX=9606 GN=LYZ PE=1 SV=1	0.001	1.769	8	1	1	1	1	148	16.5	9.16	2.06	1
FALSE	High	Master Protein	Q9NYU2	UDP-glucose:glycoprotein glucosyltransferase 1 OS=Homo sapiens OX=9606 GN=UGGT1 PE=1 SV=3	0.001	1.763	1	1	1	1	1	1555	177.1	5.63	1.69	1
FALSE	High	Master Protein	B7Z4C8	cDNA FLJ57527, highly similar to 60S ribosomal protein L31 OS=Homo sapiens OX=9606 GN=RPL31 PE=1 SV=1	0.001	1.749	7	1	1	1	1	130	15.1	10.37	2.26	1
FALSE	High	Master Protein	Q07065	Cytoskeleton-associated protein 4 OS=Homo sapiens OX=9606 GN=CKAP4 PE=1 SV=2	0.001	1.702	3	1	1	1	1	602	66	5.92	3.46	1
FALSE	High	Master Protein	P25205	DNA replication licensing factor MCM3 OS=Homo sapiens OX=9606 GN=MCM3 PE=1 SV=3	0.001	1.701	1	1	1	1	1	808	90.9	5.77	1.63	1
FALSE	High	Master Protein	Q8WUP2	Filamin-binding LIM protein 1 OS=Homo sapiens OX=9606 GN=FBLIM1 PE=1 SV=2	0.001	1.693	4	1	1	1	1	373	40.6	6.02	1.79	1
FALSE	High	Master Protein	P05386	60S acidic ribosomal protein P1 OS=Homo sapiens OX=9606 GN=RPLP1 PE=1 SV=1	0.001	1.686	14	1	1	1	1	114	11.5	4.32	2.19	1
FALSE	High	Master Protein	M0R2B7	DNA polymerase OS=Homo sapiens OX=9606 GN=POLD1 PE=1 SV=1	0.001	1.66	1	1	1	1	1	1133	126.3	7.21	2.38	1
FALSE	High	Master Protein	E9PLN8	Uncharacterized protein (Fragment) OS=Homo sapiens OX=9606 PE=4 SV=1	0.001	1.646	8	1	1	1	1	166	17.9	8.62	1.62	1
FALSE	High	Master Protein	P37108	Signal recognition particle 14 kDa protein OS=Homo sapiens OX=9606 GN=SRP14 PE=1 SV=2	0.001	1.641	6	1	1	1	1	136	14.6	10.04	1.7	1
FALSE	High	Master Protein	O75323	Protein NipSnap homolog 2 OS=Homo sapiens OX=9606 GN=NIPSNAP2 PE=1 SV=1	0.001	1.638	3	1	1	1	1	286	33.7	9.36	0	1
FALSE	High	Master Protein	P60842	Eukaryotic initiation factor 4A-I OS=Homo sapiens OX=9606 GN=EIF4A1 PE=1 SV=1	0.001	1.626	3	1	1	1	1	406	46.1	5.48	2.39	1
FALSE	High	Master Protein	P17096	High mobility group protein HMG-I/HMG-Y OS=Homo sapiens OX=9606 GN=HMGA1 PE=1 SV=3	0.001	1.612	23	1	1	1	1	107	11.7	10.32	2.5	1
FALSE	High	Master Protein	G5E9Q6	Profilin OS=Homo sapiens OX=9606 GN=PFN2 PE=1 SV=1	0.002	1.601	7	1	1	1	1	188	20.8	7.52	2	1
FALSE	High	Master Protein	P82912	28S ribosomal protein S11, mitochondrial OS=Homo sapiens OX=9606 GN=MRPS11 PE=1 SV=2	0.002	1.593	6	1	1	1	1	194	20.6	10.81	0	1
FALSE	High	Master Protein	Q8N1N4	Keratin, type II cytoskeletal 78 OS=Homo sapiens OX=9606 GN=KRT78 PE=1 SV=2	0.002	1.59	3	1	1	1	1	520	56.8	6.02	2.32	1
FALSE	High	Master Protein	E9PIF3	Nuclear pore complex-interacting protein family member A2 OS=Homo sapiens OX=9606 GN=NPIPA2 PE=3 SV=1	0.002	1.588	3	1	1	1	1	369	42.2	9.55	0	1
FALSE	High	Master Protein	P57088	Transmembrane protein 33 OS=Homo sapiens OX=9606 GN=TMEM33 PE=1 SV=2	0.002	1.587	5	1	1	1	1	247	28	9.7	1.62	1
FALSE	High	Master Protein	P40938	Replication factor C subunit 3 OS=Homo sapiens OX=9606 GN=RFC3 PE=1 SV=2	0.002	1.584	4	1	1	1	1	356	40.5	8.34	0	1
FALSE	High	Master Protein	P06727	Apolipoprotein A-IV OS=Homo sapiens OX=9606 GN=APOA4 PE=1 SV=3	0.002	1.581	3	1	1	1	1	396	45.4	5.38	2.02	1
FALSE	High	Master Protein	P24752	Acetyl-CoA acetyltransferase, mitochondrial OS=Homo sapiens OX=9606 GN=ACAT1 PE=1 SV=1	0.002	1.581	4	1	1	1	1	427	45.2	8.85	2.32	1
FALSE	High	Master Protein	Q9UBX7	Kallikrein-11 OS=Homo sapiens OX=9606 GN=KLK11 PE=1 SV=2	0.002	1.574	2	1	9	1	1	282	31	8.94	15.09	1
FALSE	High	Master Protein	Q9Y223	Bifunctional UDP-N-acetylglucosamine 2-epimerase/N-acetylmannosamine kinase OS=Homo sapiens OX=9606 GN=GNE PE=1 SV=1	0.002	1.564	2	1	1	1	1	722	79.2	6.8	1.82	1
FALSE	High	Master Protein	Q09028	Histone-binding protein RBBP4 OS=Homo sapiens OX=9606 GN=RBBP4 PE=1 SV=3	0.002	1.558	2	1	2	1	1	425	47.6	4.89	1.95	1
FALSE	High	Master Protein	P63000	Ras-related C3 botulinum toxin substrate 1 OS=Homo sapiens OX=9606 GN=RAC1 PE=1 SV=1	0.002	1.55	7	1	1	1	1	192	21.4	8.5	2.33	1
FALSE	High	Master Protein	Q9UH62	Armadillo repeat-containing X-linked protein 3 OS=Homo sapiens OX=9606 GN=ARMCX3 PE=1 SV=1	0.002	1.547	3	1	1	1	1	379	42.5	8.37	1.88	1
FALSE	High	Master Protein	P17028	Zinc finger protein 24 OS=Homo sapiens OX=9606 GN=ZNF24 PE=1 SV=4	0.002	1.536	4	1	1	1	1	368	42.1	6.21	0	1
FALSE	High	Master Protein	O15145	Actin-related protein 2/3 complex subunit 3 OS=Homo sapiens OX=9606 GN=ARPC3 PE=1 SV=3	0.002	1.533	6	1	1	1	1	178	20.5	8.59	2.88	1
FALSE	High	Master Protein	O95487	Protein transport protein Sec24B OS=Homo sapiens OX=9606 GN=SEC24B PE=1 SV=2	0.002	1.527	1	1	1	1	1	1268	137.3	6.67	2.48	1
FALSE	High	Master Protein	P30048	Thioredoxin-dependent peroxide reductase, mitochondrial OS=Homo sapiens OX=9606 GN=PRDX3 PE=1 SV=3	0.002	1.523	4	1	1	1	1	256	27.7	7.78	1.77	1
FALSE	High	Master Protein	P11274	Breakpoint cluster region protein OS=Homo sapiens OX=9606 GN=BCR PE=1 SV=2	0.002	1.515	1	1	1	1	1	1271	142.7	7.03	2.17	1
FALSE	High	Master Protein	Q16629	Serine/arginine-rich splicing factor 7 OS=Homo sapiens OX=9606 GN=SRSF7 PE=1 SV=1	0.002	1.514	7	1	1	1	1	238	27.4	11.82	2.36	1
FALSE	High	Master Protein	Q9Y3U8	60S ribosomal protein L36 OS=Homo sapiens OX=9606 GN=RPL36 PE=1 SV=3	0.002	1.475	12	1	1	1	1	105	12.2	11.59	0	1
FALSE	High	Master Protein	Q16822	Phosphoenolpyruvate carboxykinase [GTP], mitochondrial OS=Homo sapiens OX=9606 GN=PCK2 PE=1 SV=4	0.002	1.471	2	1	1	1	1	640	70.7	7.62	0	1
FALSE	High	Master Protein	A0A0C4DG17	40S ribosomal protein SA OS=Homo sapiens OX=9606 GN=RPSA PE=1 SV=1	0.002	1.465	4	1	2	1	1	300	33.3	4.87	3.69	1
FALSE	High	Master Protein	Q6UXI9	Nephronectin OS=Homo sapiens OX=9606 GN=NPNT PE=2 SV=3	0.002	1.462	2	1	1	1	1	565	61.9	8.34	1.82	1
FALSE	High	Master Protein	P31944	Caspase-14 OS=Homo sapiens OX=9606 GN=CASP14 PE=1 SV=2	0.002	1.461	4	1	1	1	1	242	27.7	5.58	0	1
FALSE	High	Master Protein	O75643	U5 small nuclear ribonucleoprotein 200 kDa helicase OS=Homo sapiens OX=9606 GN=SNRNP200 PE=1 SV=2	0.002	1.457	1	1	1	1	1	2136	244.4	6.06	2.01	1
FALSE	High	Master Protein	Q08170	Serine/arginine-rich splicing factor 4 OS=Homo sapiens OX=9606 GN=SRSF4 PE=1 SV=2	0.002	1.447	2	1	1	1	1	494	56.6	11.52	1.66	1
FALSE	High	Master Protein	P32322	Pyrroline-5-carboxylate reductase 1, mitochondrial OS=Homo sapiens OX=9606 GN=PYCR1 PE=1 SV=2	0.002	1.446	3	1	1	1	1	319	33.3	7.61	0	1
FALSE	High	Master Protein	P11021	Endoplasmic reticulum chaperone BiP OS=Homo sapiens OX=9606 GN=HSPA5 PE=1 SV=2	0.003	1.435	3	1	1	1	1	654	72.3	5.16	2.72	1
FALSE	High	Master Protein	A0A286YEY1	Immunoglobulin heavy constant alpha 1 (Fragment) OS=Homo sapiens OX=9606 GN=IGHA1 PE=1 SV=1	0.003	1.415	2	1	1	1	1	398	42.8	5.64	0	1
FALSE	High	Master Protein	P25815	Protein S100-P OS=Homo sapiens OX=9606 GN=S100P PE=1 SV=2	0.003	1.414	14	1	1	1	1	95	10.4	4.88	0	1
FALSE	High	Master Protein	A0A087WXU3	Extended synaptotagmin-2 OS=Homo sapiens OX=9606 GN=ESYT2 PE=1 SV=1	0.003	1.405	1	1	1	1	1	921	102.3	9.26	1.78	1
FALSE	High	Master Protein	Q5JVF3	PCI domain-containing protein 2 OS=Homo sapiens OX=9606 GN=PCID2 PE=1 SV=2	0.003	1.401	3	1	1	1	1	399	46	8.53	0	1
FALSE	High	Master Protein	Q8WUM4	Programmed cell death 6-interacting protein OS=Homo sapiens OX=9606 GN=PDCD6IP PE=1 SV=1	0.003	1.394	1	1	2	1	1	868	96	6.52	4.65	1
FALSE	High	Master Protein	Q4KMP7	TBC1 domain family member 10B OS=Homo sapiens OX=9606 GN=TBC1D10B PE=1 SV=3	0.003	1.384	1	1	1	1	1	808	87.1	9.19	2.03	1
FALSE	High	Master Protein	P00966	Argininosuccinate synthase OS=Homo sapiens OX=9606 GN=ASS1 PE=1 SV=2	0.003	1.373	3	1	1	1	1	412	46.5	8.02	0	1
FALSE	High	Master Protein	Q8NE71	ATP-binding cassette sub-family F member 1 OS=Homo sapiens OX=9606 GN=ABCF1 PE=1 SV=2	0.003	1.366	2	1	1	1	1	845	95.9	6.8	2.23	1
FALSE	High	Master Protein	F5H2F4	C-1-tetrahydrofolate synthase, cytoplasmic OS=Homo sapiens OX=9606 GN=MTHFD1 PE=1 SV=1	0.003	1.361	1	1	1	1	1	1020	110.5	8.43	1.8	1
FALSE	High	Master Protein	Q5VT25	Serine/threonine-protein kinase MRCK alpha OS=Homo sapiens OX=9606 GN=CDC42BPA PE=1 SV=1	0.003	1.361	1	1	1	1	1	1732	197.2	6.58	1.64	1
FALSE	High	Master Protein	Q13867	Bleomycin hydrolase OS=Homo sapiens OX=9606 GN=BLMH PE=1 SV=1	0.003	1.357	2	1	1	1	1	455	52.5	6.27	0	1
FALSE	High	Master Protein	H0Y449	Nuclease-sensitive element-binding protein 1 (Fragment) OS=Homo sapiens OX=9606 GN=YBX1 PE=1 SV=1	0.003	1.345	3	1	1	1	1	374	42	10.43	1.93	1
FALSE	High	Master Protein	Q14956	Transmembrane glycoprotein NMB OS=Homo sapiens OX=9606 GN=GPNMB PE=1 SV=2	0.003	1.335	2	1	1	1	1	572	63.9	6.64	1.72	1
FALSE	High	Master Protein	P06576	ATP synthase subunit beta, mitochondrial OS=Homo sapiens OX=9606 GN=ATP5F1B PE=1 SV=3	0.003	1.334	3	1	1	1	1	529	56.5	5.4	2.34	1
FALSE	High	Master Protein	Q6ZVX7	F-box only protein 50 OS=Homo sapiens OX=9606 GN=NCCRP1 PE=1 SV=1	0.003	1.332	4	1	1	1	1	275	30.8	6.62	0	1
FALSE	High	Master Protein	Q13464	Rho-associated protein kinase 1 OS=Homo sapiens OX=9606 GN=ROCK1 PE=1 SV=1	0.004	1.313	1	1	1	1	1	1354	158.1	5.9	1.73	1
FALSE	High	Master Protein	C9JJN9	Vacuolar protein sorting-associated protein 8 homolog OS=Homo sapiens OX=9606 GN=VPS8 PE=1 SV=1	0.004	1.309	1	1	1	1	1	1428	161.7	5.67	2.62	1
FALSE	High	Master Protein	A3KMH1	von Willebrand factor A domain-containing protein 8 OS=Homo sapiens OX=9606 GN=VWA8 PE=1 SV=2	0.004	1.308	1	1	1	1	1	1905	214.7	7.4	2.12	1
FALSE	High	Master Protein	O15235	28S ribosomal protein S12, mitochondrial OS=Homo sapiens OX=9606 GN=MRPS12 PE=1 SV=1	0.004	1.295	9	1	1	1	1	138	15.2	10.29	0	1
FALSE	High	Master Protein	P51793	H(+)/Cl(-) exchange transporter 4 OS=Homo sapiens OX=9606 GN=CLCN4 PE=1 SV=2	0.004	1.289	2	1	1	1	1	760	84.9	6.86	0	1
FALSE	High	Master Protein	O00541	Pescadillo homolog OS=Homo sapiens OX=9606 GN=PES1 PE=1 SV=1	0.004	1.285	2	1	1	1	1	588	68	7.33	1.66	1
FALSE	High	Master Protein	Q6BDS2	UHRF1-binding protein 1 OS=Homo sapiens OX=9606 GN=UHRF1BP1 PE=1 SV=1	0.004	1.285	1	1	1	1	1	1440	159.4	6.14	0	1
FALSE	High	Master Protein	O00750	Phosphatidylinositol 4-phosphate 3-kinase C2 domain-containing subunit beta OS=Homo sapiens OX=9606 GN=PIK3C2B PE=1 SV=2	0.004	1.282	1	1	1	1	1	1634	184.7	7.3	2.31	1
FALSE	High	Master Protein	H7C0C1	Uncharacterized protein (Fragment) OS=Homo sapiens OX=9606 PE=4 SV=2	0.004	1.277	5	1	1	1	1	242	26.8	9.45	1.77	1
FALSE	High	Master Protein	O75531	Barrier-to-autointegration factor OS=Homo sapiens OX=9606 GN=BANF1 PE=1 SV=1	0.004	1.276	13	1	1	1	1	89	10.1	6.09	1.79	1
FALSE	High	Master Protein	Q3KQU3	MAP7 domain-containing protein 1 OS=Homo sapiens OX=9606 GN=MAP7D1 PE=1 SV=1	0.004	1.273	2	1	1	1	1	841	92.8	10.11	0	1
FALSE	High	Master Protein	Q00325	Phosphate carrier protein, mitochondrial OS=Homo sapiens OX=9606 GN=SLC25A3 PE=1 SV=2	0.004	1.27	4	1	1	1	1	362	40.1	9.38	0	1
FALSE	High	Master Protein	O43615	Mitochondrial import inner membrane translocase subunit TIM44 OS=Homo sapiens OX=9606 GN=TIMM44 PE=1 SV=2	0.004	1.263	2	1	1	1	1	452	51.3	8.32	0	1
FALSE	High	Master Protein	A1KXE4	Myelin-associated neurite-outgrowth inhibitor OS=Homo sapiens OX=9606 GN=FAM168B PE=1 SV=1	0.005	1.257	9	1	1	1	1	195	20.3	9.23	2.63	1
FALSE	High	Master Protein	Q8N7C7	RING finger protein 148 OS=Homo sapiens OX=9606 GN=RNF148 PE=2 SV=2	0.005	1.249	4	1	1	1	1	305	34.4	8.19	2.36	1
FALSE	High	Master Protein	Q9BYE4	Small proline-rich protein 2G OS=Homo sapiens OX=9606 GN=SPRR2G PE=3 SV=1	0.005	1.242	12	1	1	1	1	73	8.2	7.96	0	1
FALSE	High	Master Protein	Q15149	Plectin OS=Homo sapiens OX=9606 GN=PLEC PE=1 SV=3	0.007	1.23	0	1	1	1	1	4684	531.5	5.96	0	1
FALSE	High	Master Protein	P35321	Cornifin-A OS=Homo sapiens OX=9606 GN=SPRR1A PE=1 SV=2	0.007	1.227	9	1	1	1	1	89	9.9	8.48	0	1
FALSE	High	Master Protein	J3QRS3	Myosin regulatory light chain 12A OS=Homo sapiens OX=9606 GN=MYL12A PE=1 SV=1	0.007	1.222	6	1	1	1	1	177	20.4	4.75	2.11	1
FALSE	High	Master Protein	Q5JSZ5	Protein PRRC2B OS=Homo sapiens OX=9606 GN=PRRC2B PE=1 SV=2	0.007	1.21	1	1	1	1	1	2229	242.8	8.34	1.98	1
FALSE	High	Master Protein	Q7L0Y3	tRNA methyltransferase 10 homolog C OS=Homo sapiens OX=9606 GN=TRMT10C PE=1 SV=2	0.007	1.202	3	1	2	1	1	403	47.3	9.36	2.01	1
FALSE	High	Master Protein	A0A2R8Y7X9	Uncharacterized protein OS=Homo sapiens OX=9606 PE=3 SV=1	0.007	1.194	6	1	1	1	1	168	18.4	6.96	0	1
FALSE	High	Master Protein	P05187	Alkaline phosphatase, placental type OS=Homo sapiens OX=9606 GN=ALPP PE=1 SV=2	0.007	1.181	2	1	1	1	1	535	57.9	6.29	0	1
FALSE	High	Master Protein	Q7Z4W1	L-xylulose reductase OS=Homo sapiens OX=9606 GN=DCXR PE=1 SV=2	0.007	1.178	7	1	1	1	1	244	25.9	8.1	1.86	1
FALSE	High	Master Protein	P49368	T-complex protein 1 subunit gamma OS=Homo sapiens OX=9606 GN=CCT3 PE=1 SV=4	0.008	1.168	2	1	1	1	1	545	60.5	6.49	0	1
FALSE	High	Master Protein	Q86UV5	Ubiquitin carboxyl-terminal hydrolase 48 OS=Homo sapiens OX=9606 GN=USP48 PE=1 SV=1	0.008	1.155	1	1	1	1	1	1035	119	6.05	1.84	1
FALSE	High	Master Protein	Q9Y2Z4	Tyrosine--tRNA ligase, mitochondrial OS=Homo sapiens OX=9606 GN=YARS2 PE=1 SV=2	0.008	1.136	4	1	1	1	1	477	53.2	8.98	3	1
FALSE	High	Master Protein	P61254	60S ribosomal protein L26 OS=Homo sapiens OX=9606 GN=RPL26 PE=1 SV=1	0.008	1.131	6	1	1	1	1	145	17.2	10.55	1.87	1
FALSE	High	Master Protein	Q9Y6I4	Ubiquitin carboxyl-terminal hydrolase 3 OS=Homo sapiens OX=9606 GN=USP3 PE=1 SV=2	0.008	1.13	3	1	1	1	1	520	58.9	8.18	0	1
FALSE	High	Master Protein	P38646	Stress-70 protein, mitochondrial OS=Homo sapiens OX=9606 GN=HSPA9 PE=1 SV=2	0.008	1.13	2	1	1	1	1	679	73.6	6.16	1.69	1
FALSE	High	Master Protein	A0A087WUT6	Eukaryotic translation initiation factor 5B OS=Homo sapiens OX=9606 GN=EIF5B PE=1 SV=1	0.008	1.127	1	1	1	1	1	1220	138.6	5.58	2.43	1
FALSE	High	Master Protein	Q13895	Bystin OS=Homo sapiens OX=9606 GN=BYSL PE=1 SV=3	0.008	1.122	2	1	1	1	1	437	49.6	8.12	1.64	1
FALSE	High	Master Protein	P10606	Cytochrome c oxidase subunit 5B, mitochondrial OS=Homo sapiens OX=9606 GN=COX5B PE=1 SV=2	0.008	1.121	9	1	1	1	1	129	13.7	8.81	2.19	1
FALSE	High	Master Protein	H0YKK7	Putative golgin subfamily A member 6-like protein 19 OS=Homo sapiens OX=9606 GN=GOLGA6L19 PE=5 SV=1	0.008	1.12	2	1	1	1	1	550	64.5	4.75	0	1
FALSE	High	Master Protein	H3BQ19	Docking protein 4 OS=Homo sapiens OX=9606 GN=DOK4 PE=1 SV=1	0.008	1.119	3	1	1	1	1	365	41.1	7.71	1.97	1
FALSE	High	Master Protein	Q99590	Protein SCAF11 OS=Homo sapiens OX=9606 GN=SCAF11 PE=1 SV=2	0.008	1.113	1	1	1	1	1	1463	164.6	8.41	0	1
FALSE	High	Master Protein	O43175	D-3-phosphoglycerate dehydrogenase OS=Homo sapiens OX=9606 GN=PHGDH PE=1 SV=4	0.008	1.101	4	1	1	1	1	533	56.6	6.71	0	1
FALSE	High	Master Protein	Q8TC12	Retinol dehydrogenase 11 OS=Homo sapiens OX=9606 GN=RDH11 PE=1 SV=2	0.008	1.099	4	1	1	1	1	318	35.4	8.82	0	1
FALSE	High	Master Protein	Q02413	Desmoglein-1 OS=Homo sapiens OX=9606 GN=DSG1 PE=1 SV=2	0.008	1.097	2	1	1	1	1	1049	113.7	5.03	2.6	1
FALSE	High	Master Protein	H7C561	Splicing factor 1 (Fragment) OS=Homo sapiens OX=9606 GN=SF1 PE=1 SV=8	0.008	1.089	3	1	1	1	1	291	30.1	9.1	2.1	1
FALSE	High	Master Protein	P25705	ATP synthase subunit alpha, mitochondrial OS=Homo sapiens OX=9606 GN=ATP5F1A PE=1 SV=1	0.008	1.085	2	1	1	1	1	553	59.7	9.13	1.64	1
FALSE	High	Master Protein	A0A0C4DGG9	Chromodomain-helicase-DNA-binding protein 4 OS=Homo sapiens OX=9606 GN=CHD4 PE=1 SV=1	0.008	1.085	0	1	1	1	1	1937	220.3	6.02	0	1
FALSE	High	Master Protein	Q9UG63	ATP-binding cassette sub-family F member 2 OS=Homo sapiens OX=9606 GN=ABCF2 PE=1 SV=2	0.008	1.06	1	1	1	1	1	623	71.2	7.37	0	1
FALSE	High	Master Protein	P07339	Cathepsin D OS=Homo sapiens OX=9606 GN=CTSD PE=1 SV=1	0.008	1.059	2	1	1	1	1	412	44.5	6.54	0	1
FALSE	High	Master Protein	Q92901	60S ribosomal protein L3-like OS=Homo sapiens OX=9606 GN=RPL3L PE=2 SV=3	0.008	1.057	3	1	1	1	1	407	46.3	10.45	1.74	1
FALSE	High	Master Protein	Q6ZMV5	Protein PPP4R3C OS=Homo sapiens OX=9606 GN=PPP4R3C PE=2 SV=3	0.008	1.053	1	1	1	1	1	832	95.7	4.82	0	1
FALSE	High	Master Protein	Q9UNF1	Melanoma-associated antigen D2 OS=Homo sapiens OX=9606 GN=MAGED2 PE=1 SV=2	0.009	1.05	2	1	1	1	1	606	64.9	9.32	0	1
FALSE	High	Master Protein	P15328	Folate receptor alpha OS=Homo sapiens OX=9606 GN=FOLR1 PE=1 SV=3	0.009	1.041	6	1	1	1	1	257	29.8	7.97	2.21	1
FALSE	High	Master Protein	Q99442	Translocation protein SEC62 OS=Homo sapiens OX=9606 GN=SEC62 PE=1 SV=1	0.009	1.035	2	1	1	1	1	399	45.8	7.12	0	1
FALSE	High	Master Protein	Q96N11	Uncharacterized protein C7orf26 OS=Homo sapiens OX=9606 GN=C7orf26 PE=2 SV=1	0.009	1.033	3	1	1	1	1	449	50	7.69	1.84	1
FALSE	High	Master Protein	H0YMV8	40S ribosomal protein S27 OS=Homo sapiens OX=9606 GN=RPS27L PE=1 SV=1	0.009	1.033	8	1	1	1	1	100	11.3	9.32	0	1
FALSE	High	Master Protein	P22695	Cytochrome b-c1 complex subunit 2, mitochondrial OS=Homo sapiens OX=9606 GN=UQCRC2 PE=1 SV=3	0.009	1.024	4	1	1	1	1	453	48.4	8.63	1.88	1
FALSE	High	Master Protein	P29400	Collagen alpha-5(IV) chain OS=Homo sapiens OX=9606 GN=COL4A5 PE=1 SV=2	0.009	1.018	2	1	1	1	1	1685	160.9	7.62	3.31	1
FALSE	High	Master Protein	Q9NVP1	ATP-dependent RNA helicase DDX18 OS=Homo sapiens OX=9606 GN=DDX18 PE=1 SV=2	0.01	1.012	2	1	1	1	1	670	75.4	9.5	1.89	1
FALSE	High	Master Protein	Q86XK3	Swi5-dependent recombination DNA repair protein 1 homolog OS=Homo sapiens OX=9606 GN=SFR1 PE=1 SV=2	0.01	1.007	3	1	1	1	1	245	28.2	6.39	1.88	1
FALSE	High	Master Protein	A0A075B6E5	Protein enabled homolog (Fragment) OS=Homo sapiens OX=9606 GN=ENAH PE=1 SV=2	0.01	1.003	5	1	1	1	1	213	24.9	7.87	0	1
FALSE	High	Master Protein	P28070	Proteasome subunit beta type-4 OS=Homo sapiens OX=9606 GN=PSMB4 PE=1 SV=4	0.01	0.996	4	1	1	1	1	264	29.2	5.97	0	1
FALSE	High	Master Protein	O00483	Cytochrome c oxidase subunit NDUFA4 OS=Homo sapiens OX=9606 GN=NDUFA4 PE=1 SV=1	0.01	0.996	10	1	1	1	1	81	9.4	9.38	1.67	1
FALSE	High	Master Protein	Q9P2D6	Protein FAM135A OS=Homo sapiens OX=9606 GN=FAM135A PE=1 SV=2	0.01	0.995	1	1	1	1	1	1515	169.7	5.39	0	1
FALSE	High	Master Protein	P13640	Metallothionein-1G OS=Homo sapiens OX=9606 GN=MT1G PE=1 SV=2	0.01	0.995	19	1	1	1	1	62	6.1	7.96	1.95	1
FALSE	High	Master Protein	Q6P280	Zinc finger protein 529 OS=Homo sapiens OX=9606 GN=ZNF529 PE=1 SV=2	0.01	0.993	2	1	1	1	1	563	65.8	8.21	0	1
FALSE	High	Master Protein	A8K070	COP9 signalosome complex subunit 1 OS=Homo sapiens OX=9606 GN=GPS1 PE=1 SV=1	0.01	0.989	1	1	1	1	1	526	58.9	6.32	0	1
FALSE	High	Master Protein	A0A2R8Y891	ATP-dependent 6-phosphofructokinase OS=Homo sapiens OX=9606 GN=PFKM PE=1 SV=1	0.01	0.987	1	1	1	1	1	883	96.8	8.12	2.16	1
FALSE	High	Master Protein	Q15942	Zyxin OS=Homo sapiens OX=9606 GN=ZYX PE=1 SV=1	0.01	0.98	2	1	1	1	1	572	61.2	6.67	0	1
FALSE	Medium	Master Protein	P40227	T-complex protein 1 subunit zeta OS=Homo sapiens OX=9606 GN=CCT6A PE=1 SV=3	0.01	0.976	3	1	1	1	1	531	58	6.68	2.16	1
FALSE	Medium	Master Protein	S4R3N1	HSPE1-MOB4 readthrough OS=Homo sapiens OX=9606 GN=HSPE1-MOB4 PE=3 SV=1	0.01	0.973	5	1	1	1	1	261	29.7	6.16	1.61	1
FALSE	Medium	Master Protein	P61978	Heterogeneous nuclear ribonucleoprotein K OS=Homo sapiens OX=9606 GN=HNRNPK PE=1 SV=1	0.01	0.969	3	1	1	1	1	463	50.9	5.54	0	1
FALSE	Medium	Master Protein	Q8N5C8	TGF-beta-activated kinase 1 and MAP3K7-binding protein 3 OS=Homo sapiens OX=9606 GN=TAB3 PE=1 SV=3	0.01	0.965	3	1	1	1	1	712	78.6	8.54	2.28	1
FALSE	Medium	Master Protein	O94874	E3 UFM1-protein ligase 1 OS=Homo sapiens OX=9606 GN=UFL1 PE=1 SV=2	0.01	0.963	2	1	1	1	1	794	89.5	6.79	0	1
FALSE	Medium	Master Protein	F8VXC8	SWI/SNF complex subunit SMARCC2 OS=Homo sapiens OX=9606 GN=SMARCC2 PE=1 SV=1	0.01	0.962	1	1	1	1	1	1245	136.1	5.71	1.95	1
FALSE	Medium	Master Protein	P29279	Connective tissue growth factor OS=Homo sapiens OX=9606 GN=CTGF PE=1 SV=2	0.01	0.96	5	1	1	1	1	349	38.1	8	0	1
FALSE	Medium	Master Protein	Q8WVX9	Fatty acyl-CoA reductase 1 OS=Homo sapiens OX=9606 GN=FAR1 PE=1 SV=1	0.011	0.958	3	1	1	1	1	515	59.3	9.17	1.82	1
FALSE	Medium	Master Protein	P29401	Transketolase OS=Homo sapiens OX=9606 GN=TKT PE=1 SV=3	0.011	0.954	1	1	1	1	1	623	67.8	7.66	0	1
FALSE	Medium	Master Protein	Q86YT6	E3 ubiquitin-protein ligase MIB1 OS=Homo sapiens OX=9606 GN=MIB1 PE=1 SV=1	0.011	0.951	1	1	1	1	1	1006	110.1	6.92	0	1
FALSE	Medium	Master Protein	E7EPT4	NADH dehydrogenase [ubiquinone] flavoprotein 2, mitochondrial OS=Homo sapiens OX=9606 GN=NDUFV2 PE=1 SV=1	0.011	0.937	5	1	1	1	1	252	27.9	8	1.81	1
FALSE	Medium	Master Protein	Q13435	Splicing factor 3B subunit 2 OS=Homo sapiens OX=9606 GN=SF3B2 PE=1 SV=2	0.011	0.937	1	1	1	1	1	895	100.2	5.67	1.76	1
FALSE	Medium	Master Protein	O14949	Cytochrome b-c1 complex subunit 8 OS=Homo sapiens OX=9606 GN=UQCRQ PE=1 SV=4	0.01	0.931	10	1	1	1	1	82	9.9	10.08	0	1
FALSE	Medium	Master Protein	A0A2R8Y851	40S ribosomal protein S29 OS=Homo sapiens OX=9606 GN=RPS29 PE=1 SV=1	0.011	0.928	9	1	1	1	1	87	10.2	9.85	0	1
