# Supplementary material for: Probing the Immunoreceptor Tyrosine-Based Inhibition Motif Interaction Protein Partners with Proteomics
Source: Molecules. 2024 Apr 25;29(9):1977. doi: 10.3390/molecules29091977 (PMC11085718; doi:10.3390/molecules29091977)
Supplement: Supplementary file 1 [file molecules-29-01977-s001.zip › Table S4-PD1-N-ITIM(pY).xlsx]

## Sheet: Proteins
Checked	Protein FDR Confidence: Combined	Master	Accession	Description	Exp. q-value: Combined	Sum PEP Score	Coverage [%]	# Peptides	# PSMs	# Unique Peptides	# Protein Groups	# AAs	MW [kDa]	calc. pI	Score Sequest HT: Sequest HT	# Peptides (by Search Engine): Sequest HT
FALSE	High	Master Protein	P04264	Keratin, type II cytoskeletal 1 OS=Homo sapiens OX=9606 GN=KRT1 PE=1 SV=6	0	100.221	57	33	133	29	1	644	66	8.12	251.31	33
FALSE	High	Master Protein	Q00839	Heterogeneous nuclear ribonucleoprotein U OS=Homo sapiens OX=9606 GN=HNRNPU PE=1 SV=6	0	92.185	31	32	57	32	1	825	90.5	6	109.27	32
FALSE	High	Master Protein	P35908	Keratin, type II cytoskeletal 2 epidermal OS=Homo sapiens OX=9606 GN=KRT2 PE=1 SV=2	0	69.999	50	22	35	17	1	639	65.4	8	71.33	22
FALSE	High	Master Protein	P22626	Heterogeneous nuclear ribonucleoproteins A2/B1 OS=Homo sapiens OX=9606 GN=HNRNPA2B1 PE=1 SV=2	0	68.007	57	18	44	15	1	353	37.4	8.95	67.13	18
FALSE	High	Master Protein	H3BPE7	RNA-binding protein FUS OS=Homo sapiens OX=9606 GN=FUS PE=1 SV=1	0	63.8	17	13	100	12	1	527	53.5	9.36	237.51	13
FALSE	High	Master Protein	P13645	Keratin, type I cytoskeletal 10 OS=Homo sapiens OX=9606 GN=KRT10 PE=1 SV=6	0	57.939	35	18	52	16	1	584	58.8	5.21	104.34	18
FALSE	High	Master Protein	P13647	Keratin, type II cytoskeletal 5 OS=Homo sapiens OX=9606 GN=KRT5 PE=1 SV=3	0	36.165	32	18	25	12	1	590	62.3	7.74	33.29	18
FALSE	High	Master Protein	P35527	Keratin, type I cytoskeletal 9 OS=Homo sapiens OX=9606 GN=KRT9 PE=1 SV=3	0	35.246	33	14	38	14	1	623	62	5.24	74.1	14
FALSE	High	Master Protein	Q86YZ3	Hornerin OS=Homo sapiens OX=9606 GN=HRNR PE=1 SV=2	0	32.01	11	9	13	9	1	2850	282.2	10.04	27.86	9
FALSE	High	Master Protein	Q92734	Protein TFG OS=Homo sapiens OX=9606 GN=TFG PE=1 SV=2	0	31.309	24	9	24	9	1	400	43.4	5.1	48.8	9
FALSE	High	Master Protein	P04259	Keratin, type II cytoskeletal 6B OS=Homo sapiens OX=9606 GN=KRT6B PE=1 SV=5	0	31.06	20	11	21	1	1	564	60	8	25.6	11
FALSE	High	Master Protein	P09651	Heterogeneous nuclear ribonucleoprotein A1 OS=Homo sapiens OX=9606 GN=HNRNPA1 PE=1 SV=5	0	30.142	30	9	13	6	1	372	38.7	9.13	27.63	9
FALSE	High	Master Protein	P02538	Keratin, type II cytoskeletal 6A OS=Homo sapiens OX=9606 GN=KRT6A PE=1 SV=3	0	30.132	20	11	18	1	1	564	60	8	27.77	11
FALSE	High	Master Protein	A0A0D9SF53	ATP-dependent RNA helicase DDX3X OS=Homo sapiens OX=9606 GN=DDX3X PE=1 SV=1	0	27.596	21	15	16	14	1	733	81.4	8.07	28.94	15
FALSE	High	Master Protein	J3KTA4	Probable ATP-dependent RNA helicase DDX5 OS=Homo sapiens OX=9606 GN=DDX5 PE=1 SV=1	0	22.997	28	11	13	8	1	614	69	8.85	24.82	11
FALSE	High	Master Protein	P04406	Glyceraldehyde-3-phosphate dehydrogenase OS=Homo sapiens OX=9606 GN=GAPDH PE=1 SV=3	0	22.694	23	7	10	7	1	335	36	8.46	16.57	7
FALSE	High	Master Protein	A0A087WTP3	Far upstream element-binding protein 2 OS=Homo sapiens OX=9606 GN=KHSRP PE=1 SV=1	0	22.263	19	8	9	8	1	711	73	7.71	18.75	8
FALSE	High	Master Protein	Q14134	Tripartite motif-containing protein 29 OS=Homo sapiens OX=9606 GN=TRIM29 PE=1 SV=2	0	22.037	21	11	12	11	1	588	65.8	7.15	11.96	11
FALSE	High	Master Protein	Q06830	Peroxiredoxin-1 OS=Homo sapiens OX=9606 GN=PRDX1 PE=1 SV=1	0	21.377	53	8	10	8	1	199	22.1	8.13	22.92	8
FALSE	High	Master Protein	Q96PK6	RNA-binding protein 14 OS=Homo sapiens OX=9606 GN=RBM14 PE=1 SV=2	0	21.115	12	8	9	8	1	669	69.4	9.67	13.75	8
FALSE	High	Master Protein	P07437	Tubulin beta chain OS=Homo sapiens OX=9606 GN=TUBB PE=1 SV=2	0	20.752	26	10	13	2	1	444	49.6	4.89	25.77	10
FALSE	High	Master Protein	P05787	Keratin, type II cytoskeletal 8 OS=Homo sapiens OX=9606 GN=KRT8 PE=1 SV=7	0	20.567	15	7	21	3	1	483	53.7	5.59	29.67	7
FALSE	High	Master Protein	P68371	Tubulin beta-4B chain OS=Homo sapiens OX=9606 GN=TUBB4B PE=1 SV=1	0	20.424	24	9	12	1	1	445	49.8	4.89	23.35	9
FALSE	High	Master Protein	P11142	Heat shock cognate 71 kDa protein OS=Homo sapiens OX=9606 GN=HSPA8 PE=1 SV=1	0	19.193	14	8	10	8	1	646	70.9	5.52	21.77	8
FALSE	High	Master Protein	Q01844	RNA-binding protein EWS OS=Homo sapiens OX=9606 GN=EWSR1 PE=1 SV=1	0	19.08	12	8	18	8	1	656	68.4	9.33	36.28	8
FALSE	High	Master Protein	P00558	Phosphoglycerate kinase 1 OS=Homo sapiens OX=9606 GN=PGK1 PE=1 SV=3	0	18.8	22	7	10	7	1	417	44.6	8.1	22.4	7
FALSE	High	Master Protein	P08779	Keratin, type I cytoskeletal 16 OS=Homo sapiens OX=9606 GN=KRT16 PE=1 SV=4	0	18.606	20	8	13	3	1	473	51.2	5.05	22.48	8
FALSE	High	Master Protein	P21291	Cysteine and glycine-rich protein 1 OS=Homo sapiens OX=9606 GN=CSRP1 PE=1 SV=3	0	18.038	40	6	10	6	1	193	20.6	8.57	25.1	6
FALSE	High	Master Protein	Q9UBN7	Histone deacetylase 6 OS=Homo sapiens OX=9606 GN=HDAC6 PE=1 SV=2	0	17.66	11	7	7	7	1	1215	131.3	5.3	19.3	7
FALSE	High	Master Protein	P62829	60S ribosomal protein L23 OS=Homo sapiens OX=9606 GN=RPL23 PE=1 SV=1	0	17.561	25	5	8	5	1	140	14.9	10.51	19.42	5
FALSE	High	Master Protein	P15924	Desmoplakin OS=Homo sapiens OX=9606 GN=DSP PE=1 SV=3	0	17.231	3	8	10	8	1	2871	331.6	6.81	6.2	8
FALSE	High	Master Protein	P15880	40S ribosomal protein S2 OS=Homo sapiens OX=9606 GN=RPS2 PE=1 SV=2	0	17.134	30	7	10	7	1	293	31.3	10.24	17.04	7
FALSE	High	Master Protein	P02533	Keratin, type I cytoskeletal 14 OS=Homo sapiens OX=9606 GN=KRT14 PE=1 SV=4	0	16.993	24	9	13	3	1	472	51.5	5.16	17.59	9
FALSE	High	Master Protein	P68366	Tubulin alpha-4A chain OS=Homo sapiens OX=9606 GN=TUBA4A PE=1 SV=1	0	16.433	32	9	10	3	1	448	49.9	5.06	22.63	9
FALSE	High	Master Protein	Q92499	ATP-dependent RNA helicase DDX1 OS=Homo sapiens OX=9606 GN=DDX1 PE=1 SV=2	0	16.404	12	8	9	8	1	740	82.4	7.23	17.07	8
FALSE	High	Master Protein	Q9BUJ2	Heterogeneous nuclear ribonucleoprotein U-like protein 1 OS=Homo sapiens OX=9606 GN=HNRNPUL1 PE=1 SV=2	0	16.323	14	7	8	7	1	856	95.7	6.92	21.83	7
FALSE	High	Master Protein	G8JLB6	Heterogeneous nuclear ribonucleoprotein H OS=Homo sapiens OX=9606 GN=HNRNPH1 PE=1 SV=1	0	16.094	16	5	9	3	1	472	51.2	6.8	18.19	5
FALSE	High	Master Protein	P31327	Carbamoyl-phosphate synthase [ammonia], mitochondrial OS=Homo sapiens OX=9606 GN=CPS1 PE=1 SV=2	0	16.061	7	7	7	7	1	1500	164.8	6.74	15.78	7
FALSE	High	Master Protein	P60709	Actin, cytoplasmic 1 OS=Homo sapiens OX=9606 GN=ACTB PE=1 SV=1	0	16.049	19	6	10	6	1	375	41.7	5.48	14.44	6
FALSE	High	Master Protein	P62701	40S ribosomal protein S4, X isoform OS=Homo sapiens OX=9606 GN=RPS4X PE=1 SV=2	0	15.782	27	8	8	8	1	263	29.6	10.15	11.78	8
FALSE	High	Master Protein	Q9H0D6	5'-3' exoribonuclease 2 OS=Homo sapiens OX=9606 GN=XRN2 PE=1 SV=1	0	15.637	11	8	9	8	1	950	108.5	7.47	14.77	8
FALSE	High	Master Protein	P06733	Alpha-enolase OS=Homo sapiens OX=9606 GN=ENO1 PE=1 SV=2	0	15.42	23	8	11	8	1	434	47.1	7.39	20.45	8
FALSE	High	Master Protein	F5H5D3	Tubulin alpha chain OS=Homo sapiens OX=9606 GN=TUBA1C PE=1 SV=1	0	15.037	23	8	9	2	1	519	57.7	5.07	18.15	8
FALSE	High	Master Protein	Q15437	Protein transport protein Sec23B OS=Homo sapiens OX=9606 GN=SEC23B PE=1 SV=2	0	14.958	20	9	9	7	1	767	86.4	6.89	17.45	9
FALSE	High	Master Protein	P13639	Elongation factor 2 OS=Homo sapiens OX=9606 GN=EEF2 PE=1 SV=4	0	14.819	11	7	9	7	1	858	95.3	6.83	12.23	7
FALSE	High	Master Protein	Q13151	Heterogeneous nuclear ribonucleoprotein A0 OS=Homo sapiens OX=9606 GN=HNRNPA0 PE=1 SV=1	0	14.758	34	7	8	6	1	305	30.8	9.29	12.97	7
FALSE	High	Master Protein	A0A1W2PQ51	Probable ATP-dependent RNA helicase DDX17 OS=Homo sapiens OX=9606 GN=DDX17 PE=1 SV=1	0	14.665	15	8	10	5	1	731	80.4	8.37	16.08	8
FALSE	High	Master Protein	P07355	Annexin A2 OS=Homo sapiens OX=9606 GN=ANXA2 PE=1 SV=2	0	14.625	14	3	5	3	1	339	38.6	7.75	13.34	3
FALSE	High	Master Protein	A0A0G2JIW1	Heat shock 70 kDa protein 1B OS=Homo sapiens OX=9606 GN=HSPA1B PE=1 SV=1	0	14.612	12	7	7	7	1	642	70.1	5.66	16.88	7
FALSE	High	Master Protein	P62280	40S ribosomal protein S11 OS=Homo sapiens OX=9606 GN=RPS11 PE=1 SV=3	0	14.548	41	9	10	9	1	158	18.4	10.3	12.47	9
FALSE	High	Master Protein	P02768	Serum albumin OS=Homo sapiens OX=9606 GN=ALB PE=1 SV=2	0	14.344	8	6	18	6	1	609	69.3	6.28	26.72	6
FALSE	High	Master Protein	Q14103	Heterogeneous nuclear ribonucleoprotein D0 OS=Homo sapiens OX=9606 GN=HNRNPD PE=1 SV=1	0	13.667	16	6	14	5	1	355	38.4	7.81	25.84	6
FALSE	High	Master Protein	Q9NXV6	CDKN2A-interacting protein OS=Homo sapiens OX=9606 GN=CDKN2AIP PE=1 SV=3	0	13.335	16	7	8	7	1	580	61.1	9.01	10.09	7
FALSE	High	Master Protein	P21333	Filamin-A OS=Homo sapiens OX=9606 GN=FLNA PE=1 SV=4	0	13.178	4	7	8	7	1	2647	280.6	6.06	10.78	7
FALSE	High	Master Protein	O95487	Protein transport protein Sec24B OS=Homo sapiens OX=9606 GN=SEC24B PE=1 SV=2	0	13.154	7	7	7	7	1	1268	137.3	6.67	10.37	7
FALSE	High	Master Protein	P31942	Heterogeneous nuclear ribonucleoprotein H3 OS=Homo sapiens OX=9606 GN=HNRNPH3 PE=1 SV=2	0	13.047	27	5	10	5	1	346	36.9	6.87	21.75	5
FALSE	High	Master Protein	P08729	Keratin, type II cytoskeletal 7 OS=Homo sapiens OX=9606 GN=KRT7 PE=1 SV=5	0	12.808	13	6	16	3	1	469	51.4	5.48	24.77	6
FALSE	High	Master Protein	Q9Y3I0	tRNA-splicing ligase RtcB homolog OS=Homo sapiens OX=9606 GN=RTCB PE=1 SV=1	0	12.762	13	5	8	5	1	505	55.2	7.23	15.27	5
FALSE	High	Master Protein	Q9Y224	RNA transcription, translation and transport factor protein OS=Homo sapiens OX=9606 GN=RTRAF PE=1 SV=1	0	12.4	21	4	7	4	1	244	28.1	6.65	16.55	4
FALSE	High	Master Protein	P53992	Protein transport protein Sec24C OS=Homo sapiens OX=9606 GN=SEC24C PE=1 SV=3	0	12.385	8	6	7	6	1	1094	118.2	7.06	14.01	6
FALSE	High	Master Protein	P08238	Heat shock protein HSP 90-beta OS=Homo sapiens OX=9606 GN=HSP90AB1 PE=1 SV=4	0	11.989	8	5	7	2	1	724	83.2	5.03	11.38	5
FALSE	High	Master Protein	P14618	Pyruvate kinase PKM OS=Homo sapiens OX=9606 GN=PKM PE=1 SV=4	0	11.68	15	7	7	7	1	531	57.9	7.84	11.03	7
FALSE	High	Master Protein	O14497	AT-rich interactive domain-containing protein 1A OS=Homo sapiens OX=9606 GN=ARID1A PE=1 SV=3	0	11.496	4	5	5	5	1	2285	241.9	6.7	2.91	5
FALSE	High	Master Protein	J3KPS3	Fructose-bisphosphate aldolase OS=Homo sapiens OX=9606 GN=ALDOA PE=1 SV=1	0	11.399	15	4	5	4	1	368	39.8	8.09	8	4
FALSE	High	Master Protein	Q13751	Laminin subunit beta-3 OS=Homo sapiens OX=9606 GN=LAMB3 PE=1 SV=1	0	11.395	7	6	6	6	1	1172	129.5	7.21	12.43	6
FALSE	High	Master Protein	P68104	Elongation factor 1-alpha 1 OS=Homo sapiens OX=9606 GN=EEF1A1 PE=1 SV=1	0	11.364	18	6	6	2	1	462	50.1	9.01	6.24	6
FALSE	High	Master Protein	P51991	Heterogeneous nuclear ribonucleoprotein A3 OS=Homo sapiens OX=9606 GN=HNRNPA3 PE=1 SV=2	0	11.256	11	5	5	4	1	378	39.6	9.01	5.79	5
FALSE	High	Master Protein	P31040	Succinate dehydrogenase [ubiquinone] flavoprotein subunit, mitochondrial OS=Homo sapiens OX=9606 GN=SDHA PE=1 SV=2	0	11.172	11	5	5	5	1	664	72.6	7.39	8.29	5
FALSE	High	Master Protein	P10809	60 kDa heat shock protein, mitochondrial OS=Homo sapiens OX=9606 GN=HSPD1 PE=1 SV=2	0	11.02	11	5	5	5	1	573	61	5.87	8.65	5
FALSE	High	Master Protein	Q99729	Heterogeneous nuclear ribonucleoprotein A/B OS=Homo sapiens OX=9606 GN=HNRNPAB PE=1 SV=2	0	10.979	14	4	11	3	1	332	36.2	8.21	26.11	4
FALSE	High	Master Protein	O43148	mRNA cap guanine-N7 methyltransferase OS=Homo sapiens OX=9606 GN=RNMT PE=1 SV=1	0	10.95	8	4	5	4	1	476	54.8	6.61	9.55	4
FALSE	High	Master Protein	Q14847	LIM and SH3 domain protein 1 OS=Homo sapiens OX=9606 GN=LASP1 PE=1 SV=2	0	10.51	20	6	6	6	1	261	29.7	7.05	11.12	6
FALSE	High	Master Protein	Q9UPQ9	Trinucleotide repeat-containing gene 6B protein OS=Homo sapiens OX=9606 GN=TNRC6B PE=1 SV=4	0	10.266	4	6	7	6	1	1833	193.9	6.76	8.79	6
FALSE	High	Master Protein	P33992	DNA replication licensing factor MCM5 OS=Homo sapiens OX=9606 GN=MCM5 PE=1 SV=5	0	10.004	8	5	5	5	1	734	82.2	8.37	8.04	5
FALSE	High	Master Protein	P07737	Profilin-1 OS=Homo sapiens OX=9606 GN=PFN1 PE=1 SV=2	0	9.571	36	5	5	5	1	140	15	8.27	9.33	5
FALSE	High	Master Protein	P07900	Heat shock protein HSP 90-alpha OS=Homo sapiens OX=9606 GN=HSP90AA1 PE=1 SV=5	0	9.443	6	4	6	1	1	732	84.6	5.02	10.59	4
FALSE	High	Master Protein	O75340	Programmed cell death protein 6 OS=Homo sapiens OX=9606 GN=PDCD6 PE=1 SV=1	0	9.352	18	3	4	3	1	191	21.9	5.4	7.03	3
FALSE	High	Master Protein	Q15436	Protein transport protein Sec23A OS=Homo sapiens OX=9606 GN=SEC23A PE=1 SV=2	0	9.261	8	5	6	3	1	765	86.1	7.08	10.08	5
FALSE	High	Master Protein	A0A2U3TZH3	Elongation factor 1-alpha OS=Homo sapiens OX=9606 GN=EEF1A2 PE=1 SV=1	0	8.933	14	5	6	1	1	496	54.3	9.04	12.15	5
FALSE	High	Master Protein	P23396	40S ribosomal protein S3 OS=Homo sapiens OX=9606 GN=RPS3 PE=1 SV=2	0	8.802	23	6	6	6	1	243	26.7	9.66	2.27	6
FALSE	High	Master Protein	Q99497	Protein/nucleic acid deglycase DJ-1 OS=Homo sapiens OX=9606 GN=PARK7 PE=1 SV=2	0	8.274	29	5	6	5	1	189	19.9	6.79	11.92	5
FALSE	High	Master Protein	A0A0A6YYL6	Protein RPL17-C18orf32 OS=Homo sapiens OX=9606 GN=RPL17-C18orf32 PE=3 SV=1	0	8.256	17	4	5	4	1	228	26.4	10.1	9.58	4
FALSE	High	Master Protein	B7Z6Z4	cDNA FLJ56329, highly similar to Myosin light polypeptide 6 OS=Homo sapiens OX=9606 GN=MYL6 PE=1 SV=1	0	8.151	21	4	5	4	1	238	26.7	5.08	9.19	4
FALSE	High	Master Protein	P62424	60S ribosomal protein L7a OS=Homo sapiens OX=9606 GN=RPL7A PE=1 SV=2	0	8.054	18	4	4	4	1	266	30	10.61	6.15	4
FALSE	High	Master Protein	Q7Z794	Keratin, type II cytoskeletal 1b OS=Homo sapiens OX=9606 GN=KRT77 PE=2 SV=3	0	7.991	8	4	8	2	1	578	61.9	5.99	10.99	4
FALSE	High	Master Protein	P62937	Peptidyl-prolyl cis-trans isomerase A OS=Homo sapiens OX=9606 GN=PPIA PE=1 SV=2	0	7.952	28	3	4	3	1	165	18	7.81	9.71	3
FALSE	High	Master Protein	P05141	ADP/ATP translocase 2 OS=Homo sapiens OX=9606 GN=SLC25A5 PE=1 SV=7	0	7.944	17	4	5	3	1	298	32.8	9.69	7.73	4
FALSE	High	Master Protein	Q9Y383	Putative RNA-binding protein Luc7-like 2 OS=Homo sapiens OX=9606 GN=LUC7L2 PE=1 SV=2	0	7.734	10	3	5	3	1	392	46.5	10.01	9.01	3
FALSE	High	Master Protein	P00338	L-lactate dehydrogenase A chain OS=Homo sapiens OX=9606 GN=LDHA PE=1 SV=2	0	7.64	15	5	6	5	1	332	36.7	8.27	11.33	5
FALSE	High	Master Protein	P62633	Cellular nucleic acid-binding protein OS=Homo sapiens OX=9606 GN=CNBP PE=1 SV=1	0	7.497	19	3	3	3	1	177	19.5	7.71	4.71	3
FALSE	High	Master Protein	P16402	Histone H1.3 OS=Homo sapiens OX=9606 GN=HIST1H1D PE=1 SV=2	0	7.343	17	4	4	4	1	221	22.3	11.02	4.82	4
FALSE	High	Master Protein	Q5D862	Filaggrin-2 OS=Homo sapiens OX=9606 GN=FLG2 PE=1 SV=1	0	7.333	3	4	4	4	1	2391	247.9	8.31	7.41	4
FALSE	High	Master Protein	Q92804	TATA-binding protein-associated factor 2N OS=Homo sapiens OX=9606 GN=TAF15 PE=1 SV=1	0	7.291	6	3	13	2	1	592	61.8	8.02	24.57	3
FALSE	High	Master Protein	P18669	Phosphoglycerate mutase 1 OS=Homo sapiens OX=9606 GN=PGAM1 PE=1 SV=2	0	7.208	20	4	4	4	1	254	28.8	7.18	5.14	4
FALSE	High	Master Protein	Q9HA64	Ketosamine-3-kinase OS=Homo sapiens OX=9606 GN=FN3KRP PE=1 SV=2	0	7.135	5	2	3	2	1	309	34.4	7.33	4.7	2
FALSE	High	Master Protein	Q52LJ0	Protein FAM98B OS=Homo sapiens OX=9606 GN=FAM98B PE=1 SV=1	0	7.051	14	3	4	3	1	330	37.2	6.29	4.04	3
FALSE	High	Master Protein	P14923	Junction plakoglobin OS=Homo sapiens OX=9606 GN=JUP PE=1 SV=3	0	6.956	8	4	4	4	1	745	81.7	6.14	9.1	4
FALSE	High	Master Protein	P58107	Epiplakin OS=Homo sapiens OX=9606 GN=EPPK1 PE=1 SV=3	0	6.956	7	3	3	3	1	5088	555.3	5.62	1.65	3
FALSE	High	Master Protein	A0A0U1RRH7	Histone H2A OS=Homo sapiens OX=9606 PE=3 SV=1	0	6.92	23	3	6	3	1	170	18.5	11.52	12.62	3
FALSE	High	Master Protein	E7EQ64	Trypsin-1 OS=Homo sapiens OX=9606 GN=PRSS1 PE=1 SV=1	0	6.656	7	2	15	2	1	261	28.1	7.25	26.63	2
FALSE	High	Master Protein	K7ELC2	40S ribosomal protein S15 OS=Homo sapiens OX=9606 GN=RPS15 PE=1 SV=1	0	6.653	26	2	3	2	1	152	17.7	10.39	6.03	2
FALSE	High	Master Protein	P52597	Heterogeneous nuclear ribonucleoprotein F OS=Homo sapiens OX=9606 GN=HNRNPF PE=1 SV=3	0	6.569	11	3	6	1	1	415	45.6	5.58	4.17	3
FALSE	High	Master Protein	E9PEB5	Far upstream element-binding protein 1 OS=Homo sapiens OX=9606 GN=FUBP1 PE=1 SV=1	0	6.565	8	3	5	2	1	655	68.9	7.93	7.66	3
FALSE	High	Master Protein	Q04695	Keratin, type I cytoskeletal 17 OS=Homo sapiens OX=9606 GN=KRT17 PE=1 SV=2	0	6.482	14	5	5	2	1	432	48.1	5.02	8.82	5
FALSE	High	Master Protein	P54886	Delta-1-pyrroline-5-carboxylate synthase OS=Homo sapiens OX=9606 GN=ALDH18A1 PE=1 SV=2	0	6.366	6	3	3	3	1	795	87.2	7.12	8.4	3
FALSE	High	Master Protein	Q15637	Splicing factor 1 OS=Homo sapiens OX=9606 GN=SF1 PE=1 SV=4	0	6.211	9	3	4	3	1	639	68.3	8.98	8.27	3
FALSE	High	Master Protein	P38646	Stress-70 protein, mitochondrial OS=Homo sapiens OX=9606 GN=HSPA9 PE=1 SV=2	0	6.208	8	4	4	4	1	679	73.6	6.16	5.99	4
FALSE	High	Master Protein	Q1KMD3	Heterogeneous nuclear ribonucleoprotein U-like protein 2 OS=Homo sapiens OX=9606 GN=HNRNPUL2 PE=1 SV=1	0	5.957	5	4	4	4	1	747	85.1	4.91	4.7	4
FALSE	High	Master Protein	P06576	ATP synthase subunit beta, mitochondrial OS=Homo sapiens OX=9606 GN=ATP5F1B PE=1 SV=3	0	5.957	11	4	4	4	1	529	56.5	5.4	7.02	4
FALSE	High	Master Protein	I3L504	Eukaryotic translation initiation factor 5A-1 OS=Homo sapiens OX=9606 GN=EIF5A PE=1 SV=1	0	5.938	16	2	2	2	1	186	20.5	5.25	5.45	2
FALSE	High	Master Protein	A0A024R4M0	40S ribosomal protein S9 OS=Homo sapiens OX=9606 GN=RPS9 PE=1 SV=1	0	5.916	16	4	4	4	1	194	22.6	10.65	1.76	4
FALSE	High	Master Protein	P62263	40S ribosomal protein S14 OS=Homo sapiens OX=9606 GN=RPS14 PE=1 SV=3	0	5.835	17	3	4	3	1	151	16.3	10.05	7.43	3
FALSE	High	Master Protein	M0R0R2	40S ribosomal protein S5 OS=Homo sapiens OX=9606 GN=RPS5 PE=1 SV=1	0	5.83	16	3	7	3	1	225	25.3	9.76	14.7	3
FALSE	High	Master Protein	P60174	Triosephosphate isomerase OS=Homo sapiens OX=9606 GN=TPI1 PE=1 SV=3	0	5.827	12	3	4	3	1	286	30.8	5.92	8.36	3
FALSE	High	Master Protein	P62269	40S ribosomal protein S18 OS=Homo sapiens OX=9606 GN=RPS18 PE=1 SV=3	0	5.822	20	4	5	2	1	152	17.7	10.99	6.31	4
FALSE	High	Master Protein	Q15366	Poly(rC)-binding protein 2 OS=Homo sapiens OX=9606 GN=PCBP2 PE=1 SV=1	0	5.614	10	3	3	2	1	365	38.6	6.79	4.03	3
FALSE	High	Master Protein	Q14157	Ubiquitin-associated protein 2-like OS=Homo sapiens OX=9606 GN=UBAP2L PE=1 SV=2	0	5.556	2	2	2	2	1	1087	114.5	7.11	4.99	2
FALSE	High	Master Protein	P33993	DNA replication licensing factor MCM7 OS=Homo sapiens OX=9606 GN=MCM7 PE=1 SV=4	0	5.55	6	3	3	3	1	719	81.3	6.46	7.02	3
FALSE	High	Master Protein	P62277	40S ribosomal protein S13 OS=Homo sapiens OX=9606 GN=RPS13 PE=1 SV=2	0	5.524	9	2	3	2	1	151	17.2	10.54	7.76	2
FALSE	High	Master Protein	Q9NX20	39S ribosomal protein L16, mitochondrial OS=Homo sapiens OX=9606 GN=MRPL16 PE=1 SV=1	0	5.408	12	3	4	3	1	251	28.4	10.13	5.1	3
FALSE	High	Master Protein	P29401	Transketolase OS=Homo sapiens OX=9606 GN=TKT PE=1 SV=3	0	5.378	9	4	4	4	1	623	67.8	7.66	0	4
FALSE	High	Master Protein	A0A0G2JQH2	40S ribosomal protein S18 OS=Homo sapiens OX=9606 GN=RPS18 PE=1 SV=1	0	5.364	97	3	3	1	1	33	3.8	11	5.78	3
FALSE	High	Master Protein	P69905	Hemoglobin subunit alpha OS=Homo sapiens OX=9606 GN=HBA1 PE=1 SV=2	0	5.299	24	3	3	3	1	142	15.2	8.68	1.62	3
FALSE	High	Master Protein	P35579	Myosin-9 OS=Homo sapiens OX=9606 GN=MYH9 PE=1 SV=4	0	5.285	2	3	3	3	1	1960	226.4	5.6	2.17	3
FALSE	High	Master Protein	Q6IPX4	40S ribosomal protein S16 OS=Homo sapiens OX=9606 GN=RPS16 PE=1 SV=1	0	5.272	22	3	3	3	1	152	17.1	10.96	2.21	3
FALSE	High	Master Protein	P11021	Endoplasmic reticulum chaperone BiP OS=Homo sapiens OX=9606 GN=HSPA5 PE=1 SV=2	0	5.227	9	4	5	4	1	654	72.3	5.16	7.02	4
FALSE	High	Master Protein	P26373	60S ribosomal protein L13 OS=Homo sapiens OX=9606 GN=RPL13 PE=1 SV=4	0	5.188	16	3	3	3	1	211	24.2	11.65	4.36	3
FALSE	High	Master Protein	P63173	60S ribosomal protein L38 OS=Homo sapiens OX=9606 GN=RPL38 PE=1 SV=2	0	5.074	19	1	2	1	1	70	8.2	10.1	6.5	1
FALSE	High	Master Protein	Q02413	Desmoglein-1 OS=Homo sapiens OX=9606 GN=DSG1 PE=1 SV=2	0	4.968	3	2	3	2	1	1049	113.7	5.03	4.51	2
FALSE	High	Master Protein	A0A2R8Y5Y7	60S ribosomal protein L9 OS=Homo sapiens OX=9606 GN=RPL9 PE=1 SV=1	0	4.9	15	2	2	2	1	220	25	9.74	3.18	2
FALSE	High	Master Protein	A0A2U3TZU2	Glucose-6-phosphate isomerase OS=Homo sapiens OX=9606 GN=GPI PE=1 SV=1	0	4.774	6	3	3	3	1	597	67.2	8.97	1.77	3
FALSE	High	Master Protein	P31483	Nucleolysin TIA-1 isoform p40 OS=Homo sapiens OX=9606 GN=TIA1 PE=1 SV=3	0	4.745	8	3	3	2	1	386	42.9	7.74	5.33	3
FALSE	High	Master Protein	P39019	40S ribosomal protein S19 OS=Homo sapiens OX=9606 GN=RPS19 PE=1 SV=2	0	4.716	14	3	3	3	1	145	16.1	10.32	6.07	3
FALSE	High	Master Protein	Q16658	Fascin OS=Homo sapiens OX=9606 GN=FSCN1 PE=1 SV=3	0	4.686	7	3	3	3	1	493	54.5	7.24	4.37	3
FALSE	High	Master Protein	Q02878	60S ribosomal protein L6 OS=Homo sapiens OX=9606 GN=RPL6 PE=1 SV=3	0	4.642	9	3	3	3	1	288	32.7	10.58	2.13	3
FALSE	High	Master Protein	O95429	BAG family molecular chaperone regulator 4 OS=Homo sapiens OX=9606 GN=BAG4 PE=1 SV=1	0	4.43	15	3	3	3	1	457	49.6	5.12	5.74	3
FALSE	High	Master Protein	P62805	Histone H4 OS=Homo sapiens OX=9606 GN=HIST1H4A PE=1 SV=2	0	4.424	21	2	3	2	1	103	11.4	11.36	6.55	2
FALSE	High	Master Protein	P46783	40S ribosomal protein S10 OS=Homo sapiens OX=9606 GN=RPS10 PE=1 SV=1	0	4.391	15	2	2	2	1	165	18.9	10.15	3.76	2
FALSE	High	Master Protein	E9PK25	Cofilin-1 OS=Homo sapiens OX=9606 GN=CFL1 PE=1 SV=1	0	4.378	12	2	2	2	1	204	22.7	8.34	2.54	2
FALSE	High	Master Protein	P32119	Peroxiredoxin-2 OS=Homo sapiens OX=9606 GN=PRDX2 PE=1 SV=5	0	4.364	10	2	2	2	1	198	21.9	5.97	4.78	2
FALSE	High	Master Protein	Q99590	Protein SCAF11 OS=Homo sapiens OX=9606 GN=SCAF11 PE=1 SV=2	0	4.215	2	2	2	2	1	1463	164.6	8.41	4.08	2
FALSE	High	Master Protein	P04792	Heat shock protein beta-1 OS=Homo sapiens OX=9606 GN=HSPB1 PE=1 SV=2	0	4.191	18	3	3	3	1	205	22.8	6.4	3.86	3
FALSE	High	Master Protein	P02545	Prelamin-A/C OS=Homo sapiens OX=9606 GN=LMNA PE=1 SV=1	0	4.163	6	3	3	3	1	664	74.1	7.02	1.62	3
FALSE	High	Master Protein	B7Z4C8	cDNA FLJ57527, highly similar to 60S ribosomal protein L31 OS=Homo sapiens OX=9606 GN=RPL31 PE=1 SV=1	0	4.088	25	3	3	3	1	130	15.1	10.37	1.67	3
FALSE	High	Master Protein	P04083	Annexin A1 OS=Homo sapiens OX=9606 GN=ANXA1 PE=1 SV=2	0	4.006	4	1	2	1	1	346	38.7	7.02	2.16	1
FALSE	High	Master Protein	Q92626	Peroxidasin homolog OS=Homo sapiens OX=9606 GN=PXDN PE=1 SV=2	0	3.998	3	2	2	2	1	1479	165.2	7.17	5.1	2
FALSE	High	Master Protein	P62244	40S ribosomal protein S15a OS=Homo sapiens OX=9606 GN=RPS15A PE=1 SV=2	0	3.995	14	2	2	2	1	130	14.8	10.13	4.05	2
FALSE	High	Master Protein	Q14444	Caprin-1 OS=Homo sapiens OX=9606 GN=CAPRIN1 PE=1 SV=2	0	3.982	9	3	3	3	1	709	78.3	5.25	7.11	3
FALSE	High	Master Protein	P15531	Nucleoside diphosphate kinase A OS=Homo sapiens OX=9606 GN=NME1 PE=1 SV=1	0	3.977	19	2	2	2	1	152	17.1	6.19	1.81	2
FALSE	High	Master Protein	P08670	Vimentin OS=Homo sapiens OX=9606 GN=VIM PE=1 SV=4	0	3.962	6	2	2	2	1	466	53.6	5.12	0	2
FALSE	High	Master Protein	P46778	60S ribosomal protein L21 OS=Homo sapiens OX=9606 GN=RPL21 PE=1 SV=2	0	3.95	9	1	2	1	1	160	18.6	10.49	6.03	1
FALSE	High	Master Protein	P25398	40S ribosomal protein S12 OS=Homo sapiens OX=9606 GN=RPS12 PE=1 SV=3	0	3.923	27	3	3	3	1	132	14.5	7.21	4.25	3
FALSE	High	Master Protein	Q6PJT7	Zinc finger CCCH domain-containing protein 14 OS=Homo sapiens OX=9606 GN=ZC3H14 PE=1 SV=1	0	3.906	5	3	3	3	1	736	82.8	7.31	0	3
FALSE	High	Master Protein	P12236	ADP/ATP translocase 3 OS=Homo sapiens OX=9606 GN=SLC25A6 PE=1 SV=4	0	3.891	8	2	2	1	1	298	32.8	9.74	3.65	2
FALSE	High	Master Protein	P36542	ATP synthase subunit gamma, mitochondrial OS=Homo sapiens OX=9606 GN=ATP5F1C PE=1 SV=1	0	3.849	8	2	2	2	1	298	33	9.22	3.78	2
FALSE	High	Master Protein	U3KQK0	Histone H2B OS=Homo sapiens OX=9606 GN=HIST1H2BN PE=1 SV=1	0	3.821	7	1	2	1	1	166	18.8	10.54	2.24	1
FALSE	High	Master Protein	Q01085	Nucleolysin TIAR OS=Homo sapiens OX=9606 GN=TIAL1 PE=1 SV=1	0	3.812	13	3	3	2	1	375	41.6	7.74	6.52	3
FALSE	High	Master Protein	P05109	Protein S100-A8 OS=Homo sapiens OX=9606 GN=S100A8 PE=1 SV=1	0	3.797	25	3	4	3	1	93	10.8	7.03	7.83	3
FALSE	High	Master Protein	P26641	Elongation factor 1-gamma OS=Homo sapiens OX=9606 GN=EEF1G PE=1 SV=3	0	3.78	7	3	3	3	1	437	50.1	6.67	4.2	3
FALSE	High	Master Protein	P27635	60S ribosomal protein L10 OS=Homo sapiens OX=9606 GN=RPL10 PE=1 SV=4	0	3.774	11	2	3	2	1	214	24.6	10.08	2.51	2
FALSE	High	Master Protein	Q8N1N4	Keratin, type II cytoskeletal 78 OS=Homo sapiens OX=9606 GN=KRT78 PE=1 SV=2	0	3.762	7	3	3	3	1	520	56.8	6.02	4.37	3
FALSE	High	Master Protein	P34897	Serine hydroxymethyltransferase, mitochondrial OS=Homo sapiens OX=9606 GN=SHMT2 PE=1 SV=3	0	3.737	5	2	2	2	1	504	56	8.53	3.62	2
FALSE	High	Master Protein	Q96AB3	Isochorismatase domain-containing protein 2 OS=Homo sapiens OX=9606 GN=ISOC2 PE=1 SV=1	0	3.731	7	1	2	1	1	205	22.3	7.77	2.51	1
FALSE	High	Master Protein	P06748	Nucleophosmin OS=Homo sapiens OX=9606 GN=NPM1 PE=1 SV=2	0	3.679	7	1	2	1	1	294	32.6	4.78	4.65	1
FALSE	High	Master Protein	P11940	Polyadenylate-binding protein 1 OS=Homo sapiens OX=9606 GN=PABPC1 PE=1 SV=2	0	3.612	4	2	3	2	1	636	70.6	9.5	6.24	2
FALSE	High	Master Protein	O14602	Eukaryotic translation initiation factor 1A, Y-chromosomal OS=Homo sapiens OX=9606 GN=EIF1AY PE=1 SV=4	0	3.5	17	2	2	2	1	144	16.4	5.24	3.6	2
FALSE	High	Master Protein	P61626	Lysozyme C OS=Homo sapiens OX=9606 GN=LYZ PE=1 SV=1	0	3.472	14	2	2	2	1	148	16.5	9.16	1.82	2
FALSE	High	Master Protein	P61247	40S ribosomal protein S3a OS=Homo sapiens OX=9606 GN=RPS3A PE=1 SV=2	0	3.468	10	2	2	2	1	264	29.9	9.73	4.29	2
FALSE	High	Master Protein	P20618	Proteasome subunit beta type-1 OS=Homo sapiens OX=9606 GN=PSMB1 PE=1 SV=2	0	3.448	4	1	2	1	1	241	26.5	8.13	1.93	1
FALSE	High	Master Protein	P50238	Cysteine-rich protein 1 OS=Homo sapiens OX=9606 GN=CRIP1 PE=1 SV=3	0	3.432	30	2	7	2	1	77	8.5	8.75	8.06	2
FALSE	High	Master Protein	O43175	D-3-phosphoglycerate dehydrogenase OS=Homo sapiens OX=9606 GN=PHGDH PE=1 SV=4	0	3.419	4	1	2	1	1	533	56.6	6.71	2.89	1
FALSE	High	Master Protein	P12004	Proliferating cell nuclear antigen OS=Homo sapiens OX=9606 GN=PCNA PE=1 SV=1	0	3.382	6	1	1	1	1	261	28.8	4.69	2.95	1
FALSE	High	Master Protein	Q15323	Keratin, type I cuticular Ha1 OS=Homo sapiens OX=9606 GN=KRT31 PE=1 SV=3	0	3.38	6	2	5	2	1	416	47.2	4.88	9.78	2
FALSE	High	Master Protein	P60953	Cell division control protein 42 homolog OS=Homo sapiens OX=9606 GN=CDC42 PE=1 SV=2	0	3.378	11	2	2	2	1	191	21.2	6.55	4.09	2
FALSE	High	Master Protein	P62258	14-3-3 protein epsilon OS=Homo sapiens OX=9606 GN=YWHAE PE=1 SV=1	0	3.324	9	2	2	1	1	255	29.2	4.74	3.78	2
FALSE	High	Master Protein	P55795	Heterogeneous nuclear ribonucleoprotein H2 OS=Homo sapiens OX=9606 GN=HNRNPH2 PE=1 SV=1	0	3.284	6	2	3	1	1	449	49.2	6.3	4.52	2
FALSE	High	Master Protein	Q08380	Galectin-3-binding protein OS=Homo sapiens OX=9606 GN=LGALS3BP PE=1 SV=1	0	3.273	3	1	1	1	1	585	65.3	5.27	2.5	1
FALSE	High	Master Protein	P21912	Succinate dehydrogenase [ubiquinone] iron-sulfur subunit, mitochondrial OS=Homo sapiens OX=9606 GN=SDHB PE=1 SV=3	0	3.253	7	2	2	2	1	280	31.6	8.76	1.92	2
FALSE	High	Master Protein	P78411	Iroquois-class homeodomain protein IRX-5 OS=Homo sapiens OX=9606 GN=IRX5 PE=1 SV=3	0	3.251	5	2	2	2	1	483	50.3	6.47	1.83	2
FALSE	High	Master Protein	E7EX29	14-3-3 protein zeta/delta (Fragment) OS=Homo sapiens OX=9606 GN=YWHAZ PE=1 SV=1	0	3.236	8	2	2	1	1	246	28	4.92	3.93	2
FALSE	High	Master Protein	P16455	Methylated-DNA--protein-cysteine methyltransferase OS=Homo sapiens OX=9606 GN=MGMT PE=1 SV=1	0	3.228	17	2	2	2	1	207	21.6	8.1	4.57	2
FALSE	High	Master Protein	Q96I24	Far upstream element-binding protein 3 OS=Homo sapiens OX=9606 GN=FUBP3 PE=1 SV=2	0	3.224	3	2	2	1	1	572	61.6	8.38	0	2
FALSE	High	Master Protein	P62273	40S ribosomal protein S29 OS=Homo sapiens OX=9606 GN=RPS29 PE=1 SV=2	0	3.219	29	3	4	3	1	56	6.7	10.13	2.66	3
FALSE	High	Master Protein	P63167	Dynein light chain 1, cytoplasmic OS=Homo sapiens OX=9606 GN=DYNLL1 PE=1 SV=1	0	3.205	25	2	2	2	1	89	10.4	7.4	1.66	2
FALSE	High	Master Protein	P14625	Endoplasmin OS=Homo sapiens OX=9606 GN=HSP90B1 PE=1 SV=1	0	3.201	2	2	2	2	1	803	92.4	4.84	0	2
FALSE	High	Master Protein	P59665	Neutrophil defensin 1 OS=Homo sapiens OX=9606 GN=DEFA1 PE=1 SV=1	0	3.131	19	2	2	2	1	94	10.2	6.99	2	2
FALSE	High	Master Protein	A0A286YEY1	Immunoglobulin heavy constant alpha 1 (Fragment) OS=Homo sapiens OX=9606 GN=IGHA1 PE=1 SV=1	0	3.11	5	2	2	2	1	398	42.8	5.64	0	2
FALSE	High	Master Protein	P35268	60S ribosomal protein L22 OS=Homo sapiens OX=9606 GN=RPL22 PE=1 SV=2	0	3.104	10	1	1	1	1	128	14.8	9.19	2.04	1
FALSE	High	Master Protein	A0A087WVQ6	Clathrin heavy chain OS=Homo sapiens OX=9606 GN=CLTC PE=1 SV=1	0	3.06	1	2	2	2	1	1679	191.9	5.69	2.38	2
FALSE	High	Master Protein	P61353	60S ribosomal protein L27 OS=Homo sapiens OX=9606 GN=RPL27 PE=1 SV=2	0	3.048	14	2	2	2	1	136	15.8	10.56	0	2
FALSE	High	Master Protein	H3BNC9	Uncharacterized protein OS=Homo sapiens OX=9606 PE=3 SV=2	0	3.025	4	2	2	2	1	584	64.5	8.78	4.13	2
FALSE	High	Master Protein	P61978	Heterogeneous nuclear ribonucleoprotein K OS=Homo sapiens OX=9606 GN=HNRNPK PE=1 SV=1	0	3.022	6	2	2	2	1	463	50.9	5.54	2.28	2
FALSE	High	Master Protein	Q9Y6Q9	Nuclear receptor coactivator 3 OS=Homo sapiens OX=9606 GN=NCOA3 PE=1 SV=1	0	2.987	2	2	3	2	1	1424	155.2	7.47	3.33	2
FALSE	High	Master Protein	P37802	Transgelin-2 OS=Homo sapiens OX=9606 GN=TAGLN2 PE=1 SV=3	0	2.959	6	1	1	1	1	199	22.4	8.25	1.8	1
FALSE	High	Master Protein	P80723	Brain acid soluble protein 1 OS=Homo sapiens OX=9606 GN=BASP1 PE=1 SV=2	0	2.949	12	2	2	2	1	227	22.7	4.63	5.56	2
FALSE	High	Master Protein	Q9Y520	Protein PRRC2C OS=Homo sapiens OX=9606 GN=PRRC2C PE=1 SV=4	0	2.928	1	2	2	2	1	2896	316.7	9.13	0	2
FALSE	High	Master Protein	P78371	T-complex protein 1 subunit beta OS=Homo sapiens OX=9606 GN=CCT2 PE=1 SV=4	0	2.903	3	1	1	1	1	535	57.5	6.46	2.31	1
FALSE	High	Master Protein	P62081	40S ribosomal protein S7 OS=Homo sapiens OX=9606 GN=RPS7 PE=1 SV=1	0	2.852	7	2	2	2	1	194	22.1	10.1	4.76	2
FALSE	High	Master Protein	P63244	Receptor of activated protein C kinase 1 OS=Homo sapiens OX=9606 GN=RACK1 PE=1 SV=3	0	2.848	7	2	2	2	1	317	35.1	7.69	2.41	2
FALSE	High	Master Protein	J3QLS3	28S ribosomal protein S7, mitochondrial OS=Homo sapiens OX=9606 GN=MRPS7 PE=1 SV=1	0	2.792	9	2	2	2	1	271	31.7	9.86	1.96	2
FALSE	High	Master Protein	O43707	Alpha-actinin-4 OS=Homo sapiens OX=9606 GN=ACTN4 PE=1 SV=2	0	2.775	1	1	1	1	1	911	104.8	5.44	2.09	1
FALSE	High	Master Protein	P09382	Galectin-1 OS=Homo sapiens OX=9606 GN=LGALS1 PE=1 SV=2	0	2.766	20	2	2	2	1	135	14.7	5.5	3.47	2
FALSE	High	Master Protein	P62913	60S ribosomal protein L11 OS=Homo sapiens OX=9606 GN=RPL11 PE=1 SV=2	0	2.766	8	1	1	1	1	178	20.2	9.6	2.45	1
FALSE	High	Master Protein	Q08211	ATP-dependent RNA helicase A OS=Homo sapiens OX=9606 GN=DHX9 PE=1 SV=4	0	2.727	1	1	1	1	1	1270	140.9	6.84	1.75	1
FALSE	High	Master Protein	P53621	Coatomer subunit alpha OS=Homo sapiens OX=9606 GN=COPA PE=1 SV=2	0	2.716	2	2	2	2	1	1224	138.3	7.66	4.26	2
FALSE	High	Master Protein	Q15181	Inorganic pyrophosphatase OS=Homo sapiens OX=9606 GN=PPA1 PE=1 SV=2	0	2.654	5	1	1	1	1	289	32.6	5.86	2.08	1
FALSE	High	Master Protein	Q8TAA3	Proteasome subunit alpha-type 8 OS=Homo sapiens OX=9606 GN=PSMA8 PE=2 SV=3	0	2.64	4	1	1	1	1	256	28.5	8.98	1.99	1
FALSE	High	Master Protein	P62753	40S ribosomal protein S6 OS=Homo sapiens OX=9606 GN=RPS6 PE=1 SV=1	0	2.639	7	1	1	1	1	249	28.7	10.84	2.68	1
FALSE	High	Master Protein	O00622	Protein CYR61 OS=Homo sapiens OX=9606 GN=CYR61 PE=1 SV=1	0	2.636	6	2	2	2	1	381	42	8.21	1.86	2
FALSE	High	Master Protein	P52294	Importin subunit alpha-5 OS=Homo sapiens OX=9606 GN=KPNA1 PE=1 SV=3	0	2.627	2	1	1	1	1	538	60.2	5.01	2.26	1
FALSE	High	Master Protein	A1KXE4	Myelin-associated neurite-outgrowth inhibitor OS=Homo sapiens OX=9606 GN=FAM168B PE=1 SV=1	0	2.622	9	1	1	1	1	195	20.3	9.23	3.28	1
FALSE	High	Master Protein	Q9BTL3	RNA guanine-N7 methyltransferase activating subunit OS=Homo sapiens OX=9606 GN=RAMAC PE=1 SV=1	0	2.6	15	2	3	2	1	118	14.4	8.94	4.22	2
FALSE	High	Master Protein	Q9Y6C9	Mitochondrial carrier homolog 2 OS=Homo sapiens OX=9606 GN=MTCH2 PE=1 SV=1	0	2.595	4	1	1	1	1	303	33.3	7.97	2.63	1
FALSE	High	Master Protein	P41743	Protein kinase C iota type OS=Homo sapiens OX=9606 GN=PRKCI PE=1 SV=2	0	2.594	3	1	1	1	1	596	68.2	5.85	2.77	1
FALSE	High	Master Protein	E9PRY8	Elongation factor 1-delta OS=Homo sapiens OX=9606 GN=EEF1D PE=1 SV=1	0	2.588	2	1	1	1	1	697	76.5	7.05	2	1
FALSE	High	Master Protein	P08758	Annexin A5 OS=Homo sapiens OX=9606 GN=ANXA5 PE=1 SV=2	0	2.579	6	2	2	2	1	320	35.9	5.05	2.17	2
FALSE	High	Master Protein	Q9Y446	Plakophilin-3 OS=Homo sapiens OX=9606 GN=PKP3 PE=1 SV=1	0	2.578	3	1	1	1	1	797	87	9.32	3	1
FALSE	High	Master Protein	P46776	60S ribosomal protein L27a OS=Homo sapiens OX=9606 GN=RPL27A PE=1 SV=2	0	2.576	9	2	2	2	1	148	16.6	11	2.08	2
FALSE	High	Master Protein	A0A0C4DG17	40S ribosomal protein SA OS=Homo sapiens OX=9606 GN=RPSA PE=1 SV=1	0	2.568	4	1	1	1	1	300	33.3	4.87	1.66	1
FALSE	High	Master Protein	P30101	Protein disulfide-isomerase A3 OS=Homo sapiens OX=9606 GN=PDIA3 PE=1 SV=4	0	2.55	4	2	2	2	1	505	56.7	6.35	2.19	2
FALSE	High	Master Protein	P78357	Contactin-associated protein 1 OS=Homo sapiens OX=9606 GN=CNTNAP1 PE=1 SV=1	0	2.54	1	2	2	2	1	1384	156.2	7.05	0	2
FALSE	High	Master Protein	P16949	Stathmin OS=Homo sapiens OX=9606 GN=STMN1 PE=1 SV=3	0	2.536	9	1	1	1	1	149	17.3	5.97	2.27	1
FALSE	High	Master Protein	P30050	60S ribosomal protein L12 OS=Homo sapiens OX=9606 GN=RPL12 PE=1 SV=1	0	2.53	19	2	2	2	1	165	17.8	9.42	3.12	2
FALSE	High	Master Protein	P31949	Protein S100-A11 OS=Homo sapiens OX=9606 GN=S100A11 PE=1 SV=2	0	2.525	26	2	2	2	1	105	11.7	7.12	1.87	2
FALSE	High	Master Protein	Q15084	Protein disulfide-isomerase A6 OS=Homo sapiens OX=9606 GN=PDIA6 PE=1 SV=1	0	2.521	3	1	1	1	1	440	48.1	5.08	2.7	1
FALSE	High	Master Protein	Q7L4I2	Arginine/serine-rich coiled-coil protein 2 OS=Homo sapiens OX=9606 GN=RSRC2 PE=1 SV=1	0	2.518	3	1	1	1	1	434	50.5	11.33	1.71	1
FALSE	High	Master Protein	Q6UWP8	Suprabasin OS=Homo sapiens OX=9606 GN=SBSN PE=1 SV=2	0	2.496	9	1	1	1	1	590	60.5	7.01	2.38	1
FALSE	High	Master Protein	A0A087X0X3	Heterogeneous nuclear ribonucleoprotein M OS=Homo sapiens OX=9606 GN=HNRNPM PE=1 SV=1	0	2.493	2	1	1	1	1	730	77.5	8.78	1.85	1
FALSE	High	Master Protein	Q04837	Single-stranded DNA-binding protein, mitochondrial OS=Homo sapiens OX=9606 GN=SSBP1 PE=1 SV=1	0	2.478	18	2	2	2	1	148	17.2	9.6	2.39	2
FALSE	High	Master Protein	Q9NYU2	UDP-glucose:glycoprotein glucosyltransferase 1 OS=Homo sapiens OX=9606 GN=UGGT1 PE=1 SV=3	0	2.464	1	1	1	1	1	1555	177.1	5.63	1.75	1
FALSE	High	Master Protein	Q86X55	Histone-arginine methyltransferase CARM1 OS=Homo sapiens OX=9606 GN=CARM1 PE=1 SV=3	0	2.457	5	2	2	2	1	608	65.8	6.73	3.17	2
FALSE	High	Master Protein	P05187	Alkaline phosphatase, placental type OS=Homo sapiens OX=9606 GN=ALPP PE=1 SV=2	0	2.403	5	2	2	2	1	535	57.9	6.29	2.4	2
FALSE	High	Master Protein	P62854	40S ribosomal protein S26 OS=Homo sapiens OX=9606 GN=RPS26 PE=1 SV=3	0	2.392	10	1	1	1	1	115	13	11	3.12	1
FALSE	High	Master Protein	A8MU27	Small ubiquitin-related modifier 3 OS=Homo sapiens OX=9606 GN=SUMO3 PE=1 SV=1	0	2.371	8	1	1	1	1	147	16.9	9.67	1.7	1
FALSE	High	Master Protein	P49773	Histidine triad nucleotide-binding protein 1 OS=Homo sapiens OX=9606 GN=HINT1 PE=1 SV=2	0	2.34	18	2	2	2	1	126	13.8	6.95	2.22	2
FALSE	High	Master Protein	P62888	60S ribosomal protein L30 OS=Homo sapiens OX=9606 GN=RPL30 PE=1 SV=2	0.001	2.323	17	1	1	1	1	115	12.8	9.63	2.29	1
FALSE	High	Master Protein	Q06124	Tyrosine-protein phosphatase non-receptor type 11 OS=Homo sapiens OX=9606 GN=PTPN11 PE=1 SV=2	0.004	2.266	5	2	2	2	1	597	68.4	7.3	2.61	2
FALSE	High	Master Protein	P60866	40S ribosomal protein S20 OS=Homo sapiens OX=9606 GN=RPS20 PE=1 SV=1	0.004	2.209	9	1	1	1	1	119	13.4	9.94	2.23	1
FALSE	High	Master Protein	P49411	Elongation factor Tu, mitochondrial OS=Homo sapiens OX=9606 GN=TUFM PE=1 SV=2	0.004	2.208	4	1	1	1	1	452	49.5	7.61	2.2	1
FALSE	High	Master Protein	Q13263	Transcription intermediary factor 1-beta OS=Homo sapiens OX=9606 GN=TRIM28 PE=1 SV=5	0.004	2.208	2	1	1	1	1	835	88.5	5.77	3.13	1
FALSE	High	Master Protein	O75531	Barrier-to-autointegration factor OS=Homo sapiens OX=9606 GN=BANF1 PE=1 SV=1	0.004	2.206	13	1	1	1	1	89	10.1	6.09	2.77	1
FALSE	High	Master Protein	P36578	60S ribosomal protein L4 OS=Homo sapiens OX=9606 GN=RPL4 PE=1 SV=5	0.004	2.193	3	1	1	1	1	427	47.7	11.06	2.61	1
FALSE	High	Master Protein	Q15365	Poly(rC)-binding protein 1 OS=Homo sapiens OX=9606 GN=PCBP1 PE=1 SV=2	0.004	2.142	5	2	2	1	1	356	37.5	7.09	1.73	2
FALSE	High	Master Protein	P78347	General transcription factor II-I OS=Homo sapiens OX=9606 GN=GTF2I PE=1 SV=2	0.004	2.126	2	1	1	1	1	998	112.3	6.39	3.04	1
FALSE	High	Master Protein	F8W727	60S ribosomal protein L32 OS=Homo sapiens OX=9606 GN=RPL32 PE=1 SV=1	0.004	2.12	8	1	2	1	1	153	18	10.59	3.43	1
FALSE	High	Master Protein	P06702	Protein S100-A9 OS=Homo sapiens OX=9606 GN=S100A9 PE=1 SV=1	0.004	2.113	11	1	2	1	1	114	13.2	6.13	3.33	1
FALSE	High	Master Protein	P02788	Lactotransferrin OS=Homo sapiens OX=9606 GN=LTF PE=1 SV=6	0.004	2.107	2	1	1	1	1	710	78.1	8.12	2.36	1
FALSE	High	Master Protein	P51659	Peroxisomal multifunctional enzyme type 2 OS=Homo sapiens OX=9606 GN=HSD17B4 PE=1 SV=3	0.004	2.064	2	1	1	1	1	736	79.6	8.84	1.88	1
FALSE	High	Master Protein	P31151	Protein S100-A7 OS=Homo sapiens OX=9606 GN=S100A7 PE=1 SV=4	0.004	2.051	13	1	1	1	1	101	11.5	6.77	2.48	1
FALSE	High	Master Protein	P50454	Serpin H1 OS=Homo sapiens OX=9606 GN=SERPINH1 PE=1 SV=2	0.004	2.043	4	1	1	1	1	418	46.4	8.69	2.15	1
FALSE	High	Master Protein	Q7Z5J4	Retinoic acid-induced protein 1 OS=Homo sapiens OX=9606 GN=RAI1 PE=1 SV=2	0.004	2.016	1	1	1	1	1	1906	203.2	8.79	2	1
FALSE	High	Master Protein	P00966	Argininosuccinate synthase OS=Homo sapiens OX=9606 GN=ASS1 PE=1 SV=2	0.004	2.012	3	1	1	1	1	412	46.5	8.02	2.9	1
FALSE	High	Master Protein	E9PR30	40S ribosomal protein S30 OS=Homo sapiens OX=9606 GN=FAU PE=1 SV=1	0.004	2.01	10	1	1	1	1	98	10.9	11.56	2.01	1
FALSE	High	Master Protein	P18124	60S ribosomal protein L7 OS=Homo sapiens OX=9606 GN=RPL7 PE=1 SV=1	0.004	1.963	4	1	1	1	1	248	29.2	10.65	2.13	1
FALSE	High	Master Protein	P52292	Importin subunit alpha-1 OS=Homo sapiens OX=9606 GN=KPNA2 PE=1 SV=1	0.004	1.961	3	1	2	1	1	529	57.8	5.4	1.72	1
FALSE	High	Master Protein	Q15434	RNA-binding motif, single-stranded-interacting protein 2 OS=Homo sapiens OX=9606 GN=RBMS2 PE=1 SV=1	0.004	1.875	2	1	1	1	1	407	43.9	9.07	1.71	1
FALSE	High	Master Protein	P00387	NADH-cytochrome b5 reductase 3 OS=Homo sapiens OX=9606 GN=CYB5R3 PE=1 SV=3	0.004	1.841	4	1	1	1	1	301	34.2	7.59	0	1
FALSE	High	Master Protein	J3QQ67	60S ribosomal protein L18 (Fragment) OS=Homo sapiens OX=9606 GN=RPL18 PE=1 SV=1	0.004	1.837	7	1	1	1	1	190	21.8	11.72	1.94	1
FALSE	High	Master Protein	P78406	mRNA export factor OS=Homo sapiens OX=9606 GN=RAE1 PE=1 SV=1	0.004	1.82	2	1	1	1	1	368	40.9	7.83	0	1
FALSE	High	Master Protein	O43150	Arf-GAP with SH3 domain, ANK repeat and PH domain-containing protein 2 OS=Homo sapiens OX=9606 GN=ASAP2 PE=1 SV=3	0.004	1.82	1	1	1	1	1	1006	111.6	6.68	0	1
FALSE	High	Master Protein	Q9UPN9	E3 ubiquitin-protein ligase TRIM33 OS=Homo sapiens OX=9606 GN=TRIM33 PE=1 SV=3	0.004	1.816	1	1	1	1	1	1127	122.5	6.67	2.04	1
FALSE	High	Master Protein	P07814	Bifunctional glutamate/proline--tRNA ligase OS=Homo sapiens OX=9606 GN=EPRS PE=1 SV=5	0.004	1.8	1	1	1	1	1	1512	170.5	7.33	0	1
FALSE	High	Master Protein	Q14974	Importin subunit beta-1 OS=Homo sapiens OX=9606 GN=KPNB1 PE=1 SV=2	0.004	1.797	2	1	1	1	1	876	97.1	4.78	2.15	1
FALSE	High	Master Protein	B0YIW2	Apolipoprotein C-III variant 1 OS=Homo sapiens OX=9606 GN=APOC3 PE=1 SV=1	0.004	1.78	14	1	1	1	1	117	12.8	8.18	2.02	1
FALSE	High	Master Protein	P26639	Threonine--tRNA ligase, cytoplasmic OS=Homo sapiens OX=9606 GN=TARS PE=1 SV=3	0.004	1.761	2	1	1	1	1	723	83.4	6.67	1.92	1
FALSE	High	Master Protein	P30153	Serine/threonine-protein phosphatase 2A 65 kDa regulatory subunit A alpha isoform OS=Homo sapiens OX=9606 GN=PPP2R1A PE=1 SV=4	0.004	1.738	3	1	1	1	1	589	65.3	5.11	2.21	1
FALSE	High	Master Protein	Q92567	Protein FAM168A OS=Homo sapiens OX=9606 GN=FAM168A PE=1 SV=2	0.004	1.736	4	1	1	1	1	244	26.2	8.98	0	1
FALSE	High	Master Protein	P07195	L-lactate dehydrogenase B chain OS=Homo sapiens OX=9606 GN=LDHB PE=1 SV=2	0.004	1.703	6	1	1	1	1	334	36.6	6.05	2.47	1
FALSE	High	Master Protein	P47914	60S ribosomal protein L29 OS=Homo sapiens OX=9606 GN=RPL29 PE=1 SV=2	0.004	1.692	9	1	1	1	1	159	17.7	11.66	1.77	1
FALSE	High	Master Protein	F8VXC8	SWI/SNF complex subunit SMARCC2 OS=Homo sapiens OX=9606 GN=SMARCC2 PE=1 SV=1	0.004	1.669	1	1	1	1	1	1245	136.1	5.71	2.45	1
FALSE	High	Master Protein	P16401	Histone H1.5 OS=Homo sapiens OX=9606 GN=HIST1H1B PE=1 SV=3	0.004	1.634	6	1	1	1	1	226	22.6	10.92	2.41	1
FALSE	High	Master Protein	Q8IXB1	DnaJ homolog subfamily C member 10 OS=Homo sapiens OX=9606 GN=DNAJC10 PE=1 SV=2	0.004	1.632	1	1	1	1	1	793	91	7.18	1.86	1
FALSE	High	Master Protein	Q01813	ATP-dependent 6-phosphofructokinase, platelet type OS=Homo sapiens OX=9606 GN=PFKP PE=1 SV=2	0.004	1.628	1	1	1	1	1	784	85.5	7.55	2.24	1
FALSE	High	Master Protein	Q9UBX7	Kallikrein-11 OS=Homo sapiens OX=9606 GN=KLK11 PE=1 SV=2	0.004	1.611	2	1	8	1	1	282	31	8.94	13.27	1
FALSE	High	Master Protein	H0Y449	Nuclease-sensitive element-binding protein 1 (Fragment) OS=Homo sapiens OX=9606 GN=YBX1 PE=1 SV=1	0.004	1.599	5	1	1	1	1	374	42	10.43	1.91	1
FALSE	High	Master Protein	O00299	Chloride intracellular channel protein 1 OS=Homo sapiens OX=9606 GN=CLIC1 PE=1 SV=4	0.004	1.593	4	1	1	1	1	241	26.9	5.17	1.68	1
FALSE	High	Master Protein	S4R3N1	HSPE1-MOB4 readthrough OS=Homo sapiens OX=9606 GN=HSPE1-MOB4 PE=3 SV=1	0.004	1.586	5	1	1	1	1	261	29.7	6.16	2.07	1
FALSE	High	Master Protein	J3KPF3	4F2 cell-surface antigen heavy chain OS=Homo sapiens OX=9606 GN=SLC3A2 PE=1 SV=1	0.004	1.584	3	1	1	1	1	631	68.1	5.05	0	1
FALSE	High	Master Protein	Q96N66	Lysophospholipid acyltransferase 7 OS=Homo sapiens OX=9606 GN=MBOAT7 PE=1 SV=2	0.004	1.567	4	1	1	1	1	472	52.7	8.97	1.74	1
FALSE	High	Master Protein	O95486	Protein transport protein Sec24A OS=Homo sapiens OX=9606 GN=SEC24A PE=1 SV=2	0.004	1.565	1	1	1	1	1	1093	119.7	7.66	1.91	1
FALSE	High	Master Protein	P08047	Transcription factor Sp1 OS=Homo sapiens OX=9606 GN=SP1 PE=1 SV=3	0.004	1.475	1	1	1	1	1	785	80.6	7.34	0	1
FALSE	High	Master Protein	O00522	Krev interaction trapped protein 1 OS=Homo sapiens OX=9606 GN=KRIT1 PE=1 SV=2	0.004	1.471	1	1	2	1	1	736	84.3	8.41	3.47	1
FALSE	High	Master Protein	P32322	Pyrroline-5-carboxylate reductase 1, mitochondrial OS=Homo sapiens OX=9606 GN=PYCR1 PE=1 SV=2	0.004	1.47	3	1	1	1	1	319	33.3	7.61	0	1
FALSE	High	Master Protein	P25815	Protein S100-P OS=Homo sapiens OX=9606 GN=S100P PE=1 SV=2	0.004	1.468	14	1	1	1	1	95	10.4	4.88	2.04	1
FALSE	High	Master Protein	P40925	Malate dehydrogenase, cytoplasmic OS=Homo sapiens OX=9606 GN=MDH1 PE=1 SV=4	0.004	1.467	5	1	1	1	1	334	36.4	7.36	1.81	1
FALSE	High	Master Protein	Q8NCA5	Protein FAM98A OS=Homo sapiens OX=9606 GN=FAM98A PE=1 SV=1	0.004	1.459	2	1	1	1	1	519	55.4	9.03	0	1
FALSE	High	Master Protein	Q9Y305	Acyl-coenzyme A thioesterase 9, mitochondrial OS=Homo sapiens OX=9606 GN=ACOT9 PE=1 SV=2	0.004	1.438	2	1	1	1	1	439	49.9	8.6	1.77	1
FALSE	High	Master Protein	Q5T749	Keratinocyte proline-rich protein OS=Homo sapiens OX=9606 GN=KPRP PE=1 SV=1	0.004	1.432	2	1	1	1	1	579	64.1	8.27	0	1
FALSE	High	Master Protein	P05783	Keratin, type I cytoskeletal 18 OS=Homo sapiens OX=9606 GN=KRT18 PE=1 SV=2	0.004	1.424	3	1	1	1	1	430	48	5.45	0	1
FALSE	High	Master Protein	P05388	60S acidic ribosomal protein P0 OS=Homo sapiens OX=9606 GN=RPLP0 PE=1 SV=1	0.004	1.4	4	1	1	1	1	317	34.3	5.97	2.07	1
FALSE	High	Master Protein	P21796	Voltage-dependent anion-selective channel protein 1 OS=Homo sapiens OX=9606 GN=VDAC1 PE=1 SV=2	0.004	1.377	7	1	1	1	1	283	30.8	8.54	2.38	1
FALSE	High	Master Protein	Q96EP5	DAZ-associated protein 1 OS=Homo sapiens OX=9606 GN=DAZAP1 PE=1 SV=1	0.004	1.358	4	1	1	1	1	407	43.4	8.56	2.07	1
FALSE	High	Master Protein	O00479	High mobility group nucleosome-binding domain-containing protein 4 OS=Homo sapiens OX=9606 GN=HMGN4 PE=1 SV=3	0.004	1.353	17	1	1	1	1	90	9.5	10.48	0	1
FALSE	High	Master Protein	P24752	Acetyl-CoA acetyltransferase, mitochondrial OS=Homo sapiens OX=9606 GN=ACAT1 PE=1 SV=1	0.004	1.352	4	1	1	1	1	427	45.2	8.85	0	1
FALSE	High	Master Protein	P07910	Heterogeneous nuclear ribonucleoproteins C1/C2 OS=Homo sapiens OX=9606 GN=HNRNPC PE=1 SV=4	0.004	1.347	4	1	1	1	1	306	33.7	5.08	0	1
FALSE	High	Master Protein	Q01469	Fatty acid-binding protein 5 OS=Homo sapiens OX=9606 GN=FABP5 PE=1 SV=3	0.004	1.346	10	1	1	1	1	135	15.2	7.01	2.1	1
FALSE	High	Master Protein	Q8WX93	Palladin OS=Homo sapiens OX=9606 GN=PALLD PE=1 SV=3	0.004	1.327	1	1	1	1	1	1383	150.5	7.09	1.62	1
FALSE	High	Master Protein	P79522	Proline-rich protein 3 OS=Homo sapiens OX=9606 GN=PRR3 PE=1 SV=2	0.004	1.327	9	1	1	1	1	188	20.6	9.83	2.48	1
FALSE	High	Master Protein	P22314	Ubiquitin-like modifier-activating enzyme 1 OS=Homo sapiens OX=9606 GN=UBA1 PE=1 SV=3	0.004	1.325	1	1	1	1	1	1058	117.8	5.76	0	1
FALSE	High	Master Protein	P12273	Prolactin-inducible protein OS=Homo sapiens OX=9606 GN=PIP PE=1 SV=1	0.004	1.324	8	1	1	1	1	146	16.6	8.05	2.29	1
FALSE	High	Master Protein	Q6ZVX7	F-box only protein 50 OS=Homo sapiens OX=9606 GN=NCCRP1 PE=1 SV=1	0.004	1.322	4	1	1	1	1	275	30.8	6.62	0	1
FALSE	High	Master Protein	P60842	Eukaryotic initiation factor 4A-I OS=Homo sapiens OX=9606 GN=EIF4A1 PE=1 SV=1	0.004	1.32	3	1	1	1	1	406	46.1	5.48	0	1
FALSE	High	Master Protein	A8MUS3	60S ribosomal protein L23a OS=Homo sapiens OX=9606 GN=RPL23A PE=1 SV=1	0.004	1.308	5	1	1	1	1	194	21.9	10.48	1.94	1
FALSE	High	Master Protein	P17812	CTP synthase 1 OS=Homo sapiens OX=9606 GN=CTPS1 PE=1 SV=2	0.004	1.305	2	1	1	1	1	591	66.6	6.46	0	1
FALSE	High	Master Protein	Q9NVS2	39S ribosomal protein S18a, mitochondrial OS=Homo sapiens OX=9606 GN=MRPS18A PE=1 SV=1	0.007	1.299	5	1	1	1	1	196	22.2	10.33	0	1
FALSE	High	Master Protein	C9J6P4	Zinc finger CCCH-type antiviral protein 1 OS=Homo sapiens OX=9606 GN=ZC3HAV1 PE=1 SV=1	0.007	1.297	1	1	1	1	1	1024	114	8.56	0	1
FALSE	High	Master Protein	P53007	Tricarboxylate transport protein, mitochondrial OS=Homo sapiens OX=9606 GN=SLC25A1 PE=1 SV=2	0.007	1.293	4	1	1	1	1	311	34	9.89	1.86	1
FALSE	High	Master Protein	P05204	Non-histone chromosomal protein HMG-17 OS=Homo sapiens OX=9606 GN=HMGN2 PE=1 SV=3	0.007	1.292	17	1	1	1	1	90	9.4	9.99	0	1
FALSE	High	Master Protein	P07237	Protein disulfide-isomerase OS=Homo sapiens OX=9606 GN=P4HB PE=1 SV=3	0.007	1.288	3	1	1	1	1	508	57.1	4.87	3.43	1
FALSE	High	Master Protein	P61313	60S ribosomal protein L15 OS=Homo sapiens OX=9606 GN=RPL15 PE=1 SV=2	0.007	1.278	8	1	1	1	1	204	24.1	11.62	0	1
FALSE	High	Master Protein	J3KQE5	GTP-binding nuclear protein Ran (Fragment) OS=Homo sapiens OX=9606 GN=RAN PE=1 SV=1	0.007	1.275	3	1	1	1	1	234	26.8	9.58	2.36	1
FALSE	High	Master Protein	Q14697	Neutral alpha-glucosidase AB OS=Homo sapiens OX=9606 GN=GANAB PE=1 SV=3	0.007	1.268	2	1	1	1	1	944	106.8	6.14	0	1
FALSE	High	Master Protein	P52943	Cysteine-rich protein 2 OS=Homo sapiens OX=9606 GN=CRIP2 PE=1 SV=1	0.007	1.245	8	1	2	1	1	208	22.5	8.72	3.63	1
FALSE	High	Master Protein	P25705	ATP synthase subunit alpha, mitochondrial OS=Homo sapiens OX=9606 GN=ATP5F1A PE=1 SV=1	0.007	1.242	2	1	1	1	1	553	59.7	9.13	2.31	1
FALSE	High	Master Protein	P24534	Elongation factor 1-beta OS=Homo sapiens OX=9606 GN=EEF1B2 PE=1 SV=3	0.007	1.24	6	1	1	1	1	225	24.7	4.67	1.95	1
FALSE	High	Master Protein	P25786	Proteasome subunit alpha type-1 OS=Homo sapiens OX=9606 GN=PSMA1 PE=1 SV=1	0.008	1.228	3	1	1	1	1	263	29.5	6.61	0	1
FALSE	High	Master Protein	P09429	High mobility group protein B1 OS=Homo sapiens OX=9606 GN=HMGB1 PE=1 SV=3	0.009	1.213	7	1	1	1	1	215	24.9	5.74	1.77	1
FALSE	High	Master Protein	P22695	Cytochrome b-c1 complex subunit 2, mitochondrial OS=Homo sapiens OX=9606 GN=UQCRC2 PE=1 SV=3	0.009	1.197	4	1	1	1	1	453	48.4	8.63	1.98	1
FALSE	High	Master Protein	O95147	Dual specificity protein phosphatase 14 OS=Homo sapiens OX=9606 GN=DUSP14 PE=1 SV=1	0.009	1.192	3	1	1	1	1	198	22.2	9.57	0	1
FALSE	Medium	Master Protein	P35625	Metalloproteinase inhibitor 3 OS=Homo sapiens OX=9606 GN=TIMP3 PE=1 SV=2	0.011	1.186	4	1	1	1	1	211	24.1	8.72	0	1
FALSE	Medium	Master Protein	P39023	60S ribosomal protein L3 OS=Homo sapiens OX=9606 GN=RPL3 PE=1 SV=2	0.011	1.183	2	1	1	1	1	403	46.1	10.18	2.05	1
FALSE	Medium	Master Protein	P50553	Achaete-scute homolog 1 OS=Homo sapiens OX=9606 GN=ASCL1 PE=1 SV=2	0.011	1.178	3	1	1	1	1	236	25.4	8.79	0	1
FALSE	Medium	Master Protein	P63313	Thymosin beta-10 OS=Homo sapiens OX=9606 GN=TMSB10 PE=1 SV=2	0.011	1.167	32	1	1	1	1	44	5	5.36	2.07	1
FALSE	Medium	Master Protein	P62906	60S ribosomal protein L10a OS=Homo sapiens OX=9606 GN=RPL10A PE=1 SV=2	0.012	1.155	6	1	1	1	1	217	24.8	9.94	0	1
FALSE	Medium	Master Protein	P61927	60S ribosomal protein L37 OS=Homo sapiens OX=9606 GN=RPL37 PE=1 SV=2	0.012	1.153	7	1	1	1	1	97	11.1	11.74	1.61	1
FALSE	Medium	Master Protein	Q8ND56	Protein LSM14 homolog A OS=Homo sapiens OX=9606 GN=LSM14A PE=1 SV=3	0.012	1.152	2	1	1	1	1	463	50.5	9.52	2.06	1
FALSE	Medium	Master Protein	P62917	60S ribosomal protein L8 OS=Homo sapiens OX=9606 GN=RPL8 PE=1 SV=2	0.012	1.141	6	1	2	1	1	257	28	11.03	0	1
FALSE	Medium	Master Protein	P62851	40S ribosomal protein S25 OS=Homo sapiens OX=9606 GN=RPS25 PE=1 SV=1	0.012	1.14	7	1	1	1	1	125	13.7	10.11	2.16	1
FALSE	Medium	Master Protein	H0YMV8	40S ribosomal protein S27 OS=Homo sapiens OX=9606 GN=RPS27L PE=1 SV=1	0.012	1.139	13	1	1	1	1	100	11.3	9.32	1.86	1
FALSE	Medium	Master Protein	Q15369	Elongin-C OS=Homo sapiens OX=9606 GN=ELOC PE=1 SV=1	0.012	1.135	9	1	1	1	1	112	12.5	4.78	1.62	1
FALSE	Medium	Master Protein	P19338	Nucleolin OS=Homo sapiens OX=9606 GN=NCL PE=1 SV=3	0.012	1.127	1	1	1	1	1	710	76.6	4.7	0	1
FALSE	Medium	Master Protein	P40926	Malate dehydrogenase, mitochondrial OS=Homo sapiens OX=9606 GN=MDH2 PE=1 SV=3	0.012	1.122	7	1	1	1	1	338	35.5	8.68	3.02	1
FALSE	Medium	Master Protein	A0A0B4J220	Chromosome 11 open reading frame 48, isoform CRA_c OS=Homo sapiens OX=9606 GN=C11orf98 PE=1 SV=1	0.012	1.095	11	1	1	1	1	123	14.2	11.53	2.08	1
FALSE	Medium	Master Protein	H7C0C1	Uncharacterized protein (Fragment) OS=Homo sapiens OX=9606 PE=4 SV=2	0.012	1.081	5	1	1	1	1	242	26.8	9.45	0	1
FALSE	Medium	Master Protein	P09874	Poly [ADP-ribose] polymerase 1 OS=Homo sapiens OX=9606 GN=PARP1 PE=1 SV=4	0.012	1.073	1	1	1	1	1	1014	113	8.88	0	1
FALSE	Medium	Master Protein	A0A2R8Y5S7	Radixin OS=Homo sapiens OX=9606 GN=RDX PE=1 SV=1	0.012	1.071	2	1	1	1	1	590	69.3	6.27	0	1
FALSE	Medium	Master Protein	Q96HN2	Adenosylhomocysteinase 3 OS=Homo sapiens OX=9606 GN=AHCYL2 PE=1 SV=1	0.012	1.071	1	1	1	1	1	611	66.7	7.36	0	1
FALSE	Medium	Master Protein	P49368	T-complex protein 1 subunit gamma OS=Homo sapiens OX=9606 GN=CCT3 PE=1 SV=4	0.012	1.07	2	1	1	1	1	545	60.5	6.49	1.83	1
FALSE	Medium	Master Protein	P55809	Succinyl-CoA:3-ketoacid coenzyme A transferase 1, mitochondrial OS=Homo sapiens OX=9606 GN=OXCT1 PE=1 SV=1	0.013	1.056	2	1	1	1	1	520	56.1	7.46	1.69	1
FALSE	Medium	Master Protein	P40227	T-complex protein 1 subunit zeta OS=Homo sapiens OX=9606 GN=CCT6A PE=1 SV=3	0.013	1.054	2	1	1	1	1	531	58	6.68	0	1
FALSE	Medium	Master Protein	O15198	Mothers against decapentaplegic homolog 9 OS=Homo sapiens OX=9606 GN=SMAD9 PE=1 SV=1	0.015	1.05	2	1	1	1	1	467	52.5	7.77	1.62	1
FALSE	Medium	Master Protein	H7C561	Splicing factor 1 (Fragment) OS=Homo sapiens OX=9606 GN=SF1 PE=1 SV=8	0.015	1.048	3	1	1	1	1	291	30.1	9.1	0	1
FALSE	Medium	Master Protein	P17980	26S proteasome regulatory subunit 6A OS=Homo sapiens OX=9606 GN=PSMC3 PE=1 SV=3	0.015	1.038	2	1	1	1	1	439	49.2	5.24	0	1
FALSE	Medium	Master Protein	P13640	Metallothionein-1G OS=Homo sapiens OX=9606 GN=MT1G PE=1 SV=2	0.017	1.029	19	1	1	1	1	62	6.1	7.96	0	1
FALSE	Medium	Master Protein	P53396	ATP-citrate synthase OS=Homo sapiens OX=9606 GN=ACLY PE=1 SV=3	0.017	1.025	1	1	1	1	1	1101	120.8	7.33	1.82	1
