# Supplementary material for: Probing the Immunoreceptor Tyrosine-Based Inhibition Motif Interaction Protein Partners with Proteomics
Source: Molecules. 2024 Apr 25;29(9):1977. doi: 10.3390/molecules29091977 (PMC11085718; doi:10.3390/molecules29091977)
Supplement: Supplementary file 1 [file molecules-29-01977-s001.zip › Table S5-PD1-C-ITSM(pY).xlsx]

## Sheet: Proteins
Checked	Protein FDR Confidence: Combined	Master	Accession	Description	Exp. q-value: Combined	Sum PEP Score	Coverage [%]	# Peptides	# PSMs	# Unique Peptides	# Protein Groups	# AAs	MW [kDa]	calc. pI	Score Sequest HT: Sequest HT	# Peptides (by Search Engine): Sequest HT
FALSE	High	Master Protein	P04264	Keratin, type II cytoskeletal 1 OS=Homo sapiens OX=9606 GN=KRT1 PE=1 SV=6	0	92.632	58	35	101	31	1	644	66	8.12	173.11	35
FALSE	High	Master Protein	Q00839	Heterogeneous nuclear ribonucleoprotein U OS=Homo sapiens OX=9606 GN=HNRNPU PE=1 SV=6	0	80.06	25	25	48	25	1	825	90.5	6	91.91	25
FALSE	High	Master Protein	H3BPE7	RNA-binding protein FUS OS=Homo sapiens OX=9606 GN=FUS PE=1 SV=1	0	73.301	16	13	94	12	1	527	53.5	9.36	204.31	13
FALSE	High	Master Protein	P22626	Heterogeneous nuclear ribonucleoproteins A2/B1 OS=Homo sapiens OX=9606 GN=HNRNPA2B1 PE=1 SV=2	0	62.348	58	22	62	20	1	353	37.4	8.95	92.66	22
FALSE	High	Master Protein	P35908	Keratin, type II cytoskeletal 2 epidermal OS=Homo sapiens OX=9606 GN=KRT2 PE=1 SV=2	0	53.788	46	22	34	18	1	639	65.4	8	60.74	22
FALSE	High	Master Protein	P13645	Keratin, type I cytoskeletal 10 OS=Homo sapiens OX=9606 GN=KRT10 PE=1 SV=6	0	43.442	32	15	43	13	1	584	58.8	5.21	83.85	15
FALSE	High	Master Protein	A0A0D9SF53	ATP-dependent RNA helicase DDX3X OS=Homo sapiens OX=9606 GN=DDX3X PE=1 SV=1	0	39.484	23	18	24	17	1	733	81.4	8.07	44.35	18
FALSE	High	Master Protein	P35527	Keratin, type I cytoskeletal 9 OS=Homo sapiens OX=9606 GN=KRT9 PE=1 SV=3	0	34.929	32	13	31	13	1	623	62	5.24	61.52	13
FALSE	High	Master Protein	J3KTA4	Probable ATP-dependent RNA helicase DDX5 OS=Homo sapiens OX=9606 GN=DDX5 PE=1 SV=1	0	29.287	28	12	17	7	1	614	69	8.85	35.59	12
FALSE	High	Master Protein	Q92734	Protein TFG OS=Homo sapiens OX=9606 GN=TFG PE=1 SV=2	0	29.212	29	10	27	10	1	400	43.4	5.1	44.61	10
FALSE	High	Master Protein	P09651	Heterogeneous nuclear ribonucleoprotein A1 OS=Homo sapiens OX=9606 GN=HNRNPA1 PE=1 SV=5	0	28.76	31	9	16	7	1	372	38.7	9.13	19.42	9
FALSE	High	Master Protein	Q01844	RNA-binding protein EWS OS=Homo sapiens OX=9606 GN=EWSR1 PE=1 SV=1	0	25.813	15	9	21	9	1	656	68.4	9.33	42.22	9
FALSE	High	Master Protein	Q92499	ATP-dependent RNA helicase DDX1 OS=Homo sapiens OX=9606 GN=DDX1 PE=1 SV=2	0	23.102	20	12	14	12	1	740	82.4	7.23	17.8	12
FALSE	High	Master Protein	Q9Y3I0	tRNA-splicing ligase RtcB homolog OS=Homo sapiens OX=9606 GN=RTCB PE=1 SV=1	0	23.093	20	8	11	8	1	505	55.2	7.23	22.84	8
FALSE	High	Master Protein	P04259	Keratin, type II cytoskeletal 6B OS=Homo sapiens OX=9606 GN=KRT6B PE=1 SV=5	0	22.655	21	10	20	4	1	564	60	8	29.52	10
FALSE	High	Master Protein	P53992	Protein transport protein Sec24C OS=Homo sapiens OX=9606 GN=SEC24C PE=1 SV=3	0	22.167	12	9	13	9	1	1094	118.2	7.06	29.9	9
FALSE	High	Master Protein	Q86YZ3	Hornerin OS=Homo sapiens OX=9606 GN=HRNR PE=1 SV=2	0	21.974	9	6	11	6	1	2850	282.2	10.04	25.11	6
FALSE	High	Master Protein	Q06830	Peroxiredoxin-1 OS=Homo sapiens OX=9606 GN=PRDX1 PE=1 SV=1	0	20.326	46	8	9	8	1	199	22.1	8.13	15.88	8
FALSE	High	Master Protein	P31942	Heterogeneous nuclear ribonucleoprotein H3 OS=Homo sapiens OX=9606 GN=HNRNPH3 PE=1 SV=2	0	20.295	30	6	11	6	1	346	36.9	6.87	19.23	6
FALSE	High	Master Protein	P68363	Tubulin alpha-1B chain OS=Homo sapiens OX=9606 GN=TUBA1B PE=1 SV=1	0	19.584	30	9	12	3	1	451	50.1	5.06	19.35	9
FALSE	High	Master Protein	G8JLB6	Heterogeneous nuclear ribonucleoprotein H OS=Homo sapiens OX=9606 GN=HNRNPH1 PE=1 SV=1	0	19.031	17	5	8	2	1	472	51.2	6.8	14.77	5
FALSE	High	Master Protein	P68104	Elongation factor 1-alpha 1 OS=Homo sapiens OX=9606 GN=EEF1A1 PE=1 SV=1	0	18.812	19	7	11	7	1	462	50.1	9.01	18.46	7
FALSE	High	Master Protein	Q14103	Heterogeneous nuclear ribonucleoprotein D0 OS=Homo sapiens OX=9606 GN=HNRNPD PE=1 SV=1	0	18.473	21	10	18	9	1	355	38.4	7.81	27.9	10
FALSE	High	Master Protein	Q9BUJ2	Heterogeneous nuclear ribonucleoprotein U-like protein 1 OS=Homo sapiens OX=9606 GN=HNRNPUL1 PE=1 SV=2	0	18.309	17	9	10	9	1	856	95.7	6.92	26.99	9
FALSE	High	Master Protein	Q15437	Protein transport protein Sec23B OS=Homo sapiens OX=9606 GN=SEC23B PE=1 SV=2	0	18.208	20	10	11	9	1	767	86.4	6.89	12.41	10
FALSE	High	Master Protein	P11142	Heat shock cognate 71 kDa protein OS=Homo sapiens OX=9606 GN=HSPA8 PE=1 SV=1	0	18.08	13	8	11	8	1	646	70.9	5.52	13.17	8
FALSE	High	Master Protein	P13647	Keratin, type II cytoskeletal 5 OS=Homo sapiens OX=9606 GN=KRT5 PE=1 SV=3	0	17.442	17	8	13	4	1	590	62.3	7.74	25.19	8
FALSE	High	Master Protein	H0Y720	Trinucleotide repeat-containing gene 6B protein (Fragment) OS=Homo sapiens OX=9606 GN=TNRC6B PE=1 SV=1	0	17.39	10	9	11	9	1	1391	148.6	7.27	13.01	9
FALSE	High	Master Protein	Q13151	Heterogeneous nuclear ribonucleoprotein A0 OS=Homo sapiens OX=9606 GN=HNRNPA0 PE=1 SV=1	0	17.354	32	7	7	7	1	305	30.8	9.29	12.11	7
FALSE	High	Master Protein	P02533	Keratin, type I cytoskeletal 14 OS=Homo sapiens OX=9606 GN=KRT14 PE=1 SV=4	0	17.253	16	7	10	4	1	472	51.5	5.16	14.53	7
FALSE	High	Master Protein	P21291	Cysteine and glycine-rich protein 1 OS=Homo sapiens OX=9606 GN=CSRP1 PE=1 SV=3	0	17.241	51	8	12	8	1	193	20.6	8.57	20.3	8
FALSE	High	Master Protein	Q9UBN7	Histone deacetylase 6 OS=Homo sapiens OX=9606 GN=HDAC6 PE=1 SV=2	0	16.742	13	11	13	11	1	1215	131.3	5.3	20.93	11
FALSE	High	Master Protein	Q9H0D6	5'-3' exoribonuclease 2 OS=Homo sapiens OX=9606 GN=XRN2 PE=1 SV=1	0	16.522	13	9	13	9	1	950	108.5	7.47	14.68	9
FALSE	High	Master Protein	Q14134	Tripartite motif-containing protein 29 OS=Homo sapiens OX=9606 GN=TRIM29 PE=1 SV=2	0	16.355	20	10	11	10	1	588	65.8	7.15	8.12	10
FALSE	High	Master Protein	P62829	60S ribosomal protein L23 OS=Homo sapiens OX=9606 GN=RPL23 PE=1 SV=1	0	15.948	41	7	7	7	1	140	14.9	10.51	13.74	7
FALSE	High	Master Protein	A0A1W2PQ51	Probable ATP-dependent RNA helicase DDX17 OS=Homo sapiens OX=9606 GN=DDX17 PE=1 SV=1	0	15.87	12	8	13	3	1	731	80.4	8.37	20.46	8
FALSE	High	Master Protein	P23396	40S ribosomal protein S3 OS=Homo sapiens OX=9606 GN=RPS3 PE=1 SV=2	0	15.787	44	8	8	8	1	243	26.7	9.66	15.81	8
FALSE	High	Master Protein	A0A087WTP3	Far upstream element-binding protein 2 OS=Homo sapiens OX=9606 GN=KHSRP PE=1 SV=1	0	15.729	17	7	9	7	1	711	73	7.71	17.42	7
FALSE	High	Master Protein	P50238	Cysteine-rich protein 1 OS=Homo sapiens OX=9606 GN=CRIP1 PE=1 SV=3	0	15.329	79	5	14	5	1	77	8.5	8.75	24.55	5
FALSE	High	Master Protein	Q9Y224	RNA transcription, translation and transport factor protein OS=Homo sapiens OX=9606 GN=RTRAF PE=1 SV=1	0	14.786	25	5	7	5	1	244	28.1	6.65	14.24	5
FALSE	High	Master Protein	P08729	Keratin, type II cytoskeletal 7 OS=Homo sapiens OX=9606 GN=KRT7 PE=1 SV=5	0	14.771	18	7	13	5	1	469	51.4	5.48	22.19	7
FALSE	High	Master Protein	P68371	Tubulin beta-4B chain OS=Homo sapiens OX=9606 GN=TUBB4B PE=1 SV=1	0	14.561	16	7	8	7	1	445	49.8	4.89	13.9	7
FALSE	High	Master Protein	F5H5D3	Tubulin alpha chain OS=Homo sapiens OX=9606 GN=TUBA1C PE=1 SV=1	0	14.223	20	7	10	1	1	519	57.7	5.07	14.99	7
FALSE	High	Master Protein	P39019	40S ribosomal protein S19 OS=Homo sapiens OX=9606 GN=RPS19 PE=1 SV=2	0	14.21	41	8	9	8	1	145	16.1	10.32	8.77	8
FALSE	High	Master Protein	P62280	40S ribosomal protein S11 OS=Homo sapiens OX=9606 GN=RPS11 PE=1 SV=3	0	14.133	54	9	10	9	1	158	18.4	10.3	9.17	9
FALSE	High	Master Protein	P05787	Keratin, type II cytoskeletal 8 OS=Homo sapiens OX=9606 GN=KRT8 PE=1 SV=7	0	13.93	12	6	15	3	1	483	53.7	5.59	25.1	6
FALSE	High	Master Protein	H3BNC9	Uncharacterized protein OS=Homo sapiens OX=9606 PE=3 SV=2	0	13.924	10	6	8	6	1	584	64.5	8.78	9.72	6
FALSE	High	Master Protein	P02768	Serum albumin OS=Homo sapiens OX=9606 GN=ALB PE=1 SV=2	0	12.915	9	6	9	6	1	609	69.3	6.28	10.19	6
FALSE	High	Master Protein	Q9NXV6	CDKN2A-interacting protein OS=Homo sapiens OX=9606 GN=CDKN2AIP PE=1 SV=3	0	12.693	16	7	7	7	1	580	61.1	9.01	13.95	7
FALSE	High	Master Protein	P51991	Heterogeneous nuclear ribonucleoprotein A3 OS=Homo sapiens OX=9606 GN=HNRNPA3 PE=1 SV=2	0	12.662	17	6	8	6	1	378	39.6	9.01	12.29	6
FALSE	High	Master Protein	P46783	40S ribosomal protein S10 OS=Homo sapiens OX=9606 GN=RPS10 PE=1 SV=1	0	12.636	33	4	6	4	1	165	18.9	10.15	10.36	4
FALSE	High	Master Protein	Q15436	Protein transport protein Sec23A OS=Homo sapiens OX=9606 GN=SEC23A PE=1 SV=2	0	11.964	8	5	6	4	1	765	86.1	7.08	6.52	5
FALSE	High	Master Protein	P60709	Actin, cytoplasmic 1 OS=Homo sapiens OX=9606 GN=ACTB PE=1 SV=1	0	11.923	16	5	6	1	1	375	41.7	5.48	7.32	5
FALSE	High	Master Protein	Q9Y383	Putative RNA-binding protein Luc7-like 2 OS=Homo sapiens OX=9606 GN=LUC7L2 PE=1 SV=2	0	11.812	14	5	6	3	1	392	46.5	10.01	4.69	5
FALSE	High	Master Protein	P62701	40S ribosomal protein S4, X isoform OS=Homo sapiens OX=9606 GN=RPS4X PE=1 SV=2	0	11.78	26	7	8	7	1	263	29.6	10.15	10.07	7
FALSE	High	Master Protein	P15880	40S ribosomal protein S2 OS=Homo sapiens OX=9606 GN=RPS2 PE=1 SV=2	0	11.596	17	4	6	4	1	293	31.3	10.24	9.59	4
FALSE	High	Master Protein	P04406	Glyceraldehyde-3-phosphate dehydrogenase OS=Homo sapiens OX=9606 GN=GAPDH PE=1 SV=3	0	11.384	24	5	5	5	1	335	36	8.46	8.85	5
FALSE	High	Master Protein	Q96PK6	RNA-binding protein 14 OS=Homo sapiens OX=9606 GN=RBM14 PE=1 SV=2	0	11.256	14	7	8	7	1	669	69.4	9.67	12.59	7
FALSE	High	Master Protein	P68032	Actin, alpha cardiac muscle 1 OS=Homo sapiens OX=9606 GN=ACTC1 PE=1 SV=1	0	10.974	19	6	7	2	1	377	42	5.39	9.22	6
FALSE	High	Master Protein	Q14847	LIM and SH3 domain protein 1 OS=Homo sapiens OX=9606 GN=LASP1 PE=1 SV=2	0	10.931	21	5	7	5	1	261	29.7	7.05	8.49	5
FALSE	High	Master Protein	P15924	Desmoplakin OS=Homo sapiens OX=9606 GN=DSP PE=1 SV=3	0	10.913	3	8	8	8	1	2871	331.6	6.81	9.94	8
FALSE	High	Master Protein	P02545	Prelamin-A/C OS=Homo sapiens OX=9606 GN=LMNA PE=1 SV=1	0	10.602	12	6	8	6	1	664	74.1	7.02	13.9	6
FALSE	High	Master Protein	P31483	Nucleolysin TIA-1 isoform p40 OS=Homo sapiens OX=9606 GN=TIA1 PE=1 SV=3	0	10.492	11	4	5	3	1	386	42.9	7.74	6.56	4
FALSE	High	Master Protein	P55795	Heterogeneous nuclear ribonucleoprotein H2 OS=Homo sapiens OX=9606 GN=HNRNPH2 PE=1 SV=1	0	10.442	13	4	5	1	1	449	49.2	6.3	7.46	4
FALSE	High	Master Protein	Q13751	Laminin subunit beta-3 OS=Homo sapiens OX=9606 GN=LAMB3 PE=1 SV=1	0	10.389	6	6	7	6	1	1172	129.5	7.21	7.74	6
FALSE	High	Master Protein	P31040	Succinate dehydrogenase [ubiquinone] flavoprotein subunit, mitochondrial OS=Homo sapiens OX=9606 GN=SDHA PE=1 SV=2	0	10.384	13	6	6	6	1	664	72.6	7.39	12.02	6
FALSE	High	Master Protein	Q99729	Heterogeneous nuclear ribonucleoprotein A/B OS=Homo sapiens OX=9606 GN=HNRNPAB PE=1 SV=2	0	10.358	16	5	12	4	1	332	36.2	8.21	22.65	5
FALSE	High	Master Protein	P62937	Peptidyl-prolyl cis-trans isomerase A OS=Homo sapiens OX=9606 GN=PPIA PE=1 SV=2	0	9.975	32	3	4	3	1	165	18	7.81	8.63	3
FALSE	High	Master Protein	O95487	Protein transport protein Sec24B OS=Homo sapiens OX=9606 GN=SEC24B PE=1 SV=2	0	9.805	5	4	5	4	1	1268	137.3	6.67	9.18	4
FALSE	High	Master Protein	Q52LJ0	Protein FAM98B OS=Homo sapiens OX=9606 GN=FAM98B PE=1 SV=1	0	9.792	14	4	5	4	1	330	37.2	6.29	2.1	4
FALSE	High	Master Protein	O43148	mRNA cap guanine-N7 methyltransferase OS=Homo sapiens OX=9606 GN=RNMT PE=1 SV=1	0	9.753	6	3	4	3	1	476	54.8	6.61	10.08	3
FALSE	High	Master Protein	Q8NC51	Plasminogen activator inhibitor 1 RNA-binding protein OS=Homo sapiens OX=9606 GN=SERBP1 PE=1 SV=2	0	9.573	15	5	6	5	1	408	44.9	8.65	9.61	5
FALSE	High	Master Protein	A0A2R8Y5Y7	60S ribosomal protein L9 OS=Homo sapiens OX=9606 GN=RPL9 PE=1 SV=1	0	9.525	26	4	6	4	1	220	25	9.74	13.26	4
FALSE	High	Master Protein	Q92804	TATA-binding protein-associated factor 2N OS=Homo sapiens OX=9606 GN=TAF15 PE=1 SV=1	0	9.343	11	5	13	4	1	592	61.8	8.02	20.26	5
FALSE	High	Master Protein	Q04695	Keratin, type I cytoskeletal 17 OS=Homo sapiens OX=9606 GN=KRT17 PE=1 SV=2	0	9.211	13	5	6	3	1	432	48.1	5.02	8.55	5
FALSE	High	Master Protein	P62805	Histone H4 OS=Homo sapiens OX=9606 GN=HIST1H4A PE=1 SV=2	0	9.024	41	5	8	5	1	103	11.4	11.36	8.14	5
FALSE	High	Master Protein	Q9NVS2	39S ribosomal protein S18a, mitochondrial OS=Homo sapiens OX=9606 GN=MRPS18A PE=1 SV=1	0	8.892	16	3	4	3	1	196	22.2	10.33	3	3
FALSE	High	Master Protein	P62633	Cellular nucleic acid-binding protein OS=Homo sapiens OX=9606 GN=CNBP PE=1 SV=1	0	8.837	14	2	4	2	1	177	19.5	7.71	4.21	2
FALSE	High	Master Protein	P11940	Polyadenylate-binding protein 1 OS=Homo sapiens OX=9606 GN=PABPC1 PE=1 SV=2	0	8.652	6	3	4	3	1	636	70.6	9.5	10.17	3
FALSE	High	Master Protein	P16402	Histone H1.3 OS=Homo sapiens OX=9606 GN=HIST1H1D PE=1 SV=2	0	8.463	13	3	4	3	1	221	22.3	11.02	10.61	3
FALSE	High	Master Protein	A0A2R8Y6G6	Alpha-enolase OS=Homo sapiens OX=9606 GN=ENO1 PE=1 SV=1	0	8.307	15	5	5	5	1	434	47.3	6.99	6.25	5
FALSE	High	Master Protein	P62269	40S ribosomal protein S18 OS=Homo sapiens OX=9606 GN=RPS18 PE=1 SV=3	0	8.017	28	6	7	4	1	152	17.7	10.99	9.35	6
FALSE	High	Master Protein	Q15637	Splicing factor 1 OS=Homo sapiens OX=9606 GN=SF1 PE=1 SV=4	0	7.936	12	5	5	5	1	639	68.3	8.98	9.81	5
FALSE	High	Master Protein	Q8IXB1	DnaJ homolog subfamily C member 10 OS=Homo sapiens OX=9606 GN=DNAJC10 PE=1 SV=2	0	7.899	6	4	5	4	1	793	91	7.18	5.36	4
FALSE	High	Master Protein	Q14498	RNA-binding protein 39 OS=Homo sapiens OX=9606 GN=RBM39 PE=1 SV=2	0	7.569	8	3	3	3	1	530	59.3	10.1	6.19	3
FALSE	High	Master Protein	A6NMY6	Putative annexin A2-like protein OS=Homo sapiens OX=9606 GN=ANXA2P2 PE=5 SV=2	0	7.553	10	2	3	2	1	339	38.6	6.95	8.76	2
FALSE	High	Master Protein	P12236	ADP/ATP translocase 3 OS=Homo sapiens OX=9606 GN=SLC25A6 PE=1 SV=4	0	7.482	15	4	4	2	1	298	32.8	9.74	7.28	4
FALSE	High	Master Protein	P69905	Hemoglobin subunit alpha OS=Homo sapiens OX=9606 GN=HBA1 PE=1 SV=2	0	7.453	37	4	7	4	1	142	15.2	8.68	9.02	4
FALSE	High	Master Protein	P62851	40S ribosomal protein S25 OS=Homo sapiens OX=9606 GN=RPS25 PE=1 SV=1	0	7.421	32	5	5	5	1	125	13.7	10.11	4.43	5
FALSE	High	Master Protein	A0A0G2JQH2	40S ribosomal protein S18 OS=Homo sapiens OX=9606 GN=RPS18 PE=1 SV=1	0	7.411	70	3	4	1	1	33	3.8	11	5.09	3
FALSE	High	Master Protein	P62263	40S ribosomal protein S14 OS=Homo sapiens OX=9606 GN=RPS14 PE=1 SV=3	0	7.358	17	3	5	3	1	151	16.3	10.05	6.78	3
FALSE	High	Master Protein	Q06124	Tyrosine-protein phosphatase non-receptor type 11 OS=Homo sapiens OX=9606 GN=PTPN11 PE=1 SV=2	0	7.306	10	5	5	5	1	597	68.4	7.3	5.36	5
FALSE	High	Master Protein	M0R0R2	40S ribosomal protein S5 OS=Homo sapiens OX=9606 GN=RPS5 PE=1 SV=1	0	7.217	11	2	10	2	1	225	25.3	9.76	17.87	2
FALSE	High	Master Protein	Q9HA64	Ketosamine-3-kinase OS=Homo sapiens OX=9606 GN=FN3KRP PE=1 SV=2	0	6.884	8	2	3	2	1	309	34.4	7.33	5.56	2
FALSE	High	Master Protein	Q93052	Lipoma-preferred partner OS=Homo sapiens OX=9606 GN=LPP PE=1 SV=1	0	6.717	11	4	4	4	1	612	65.7	7.37	3.93	4
FALSE	High	Master Protein	P60866	40S ribosomal protein S20 OS=Homo sapiens OX=9606 GN=RPS20 PE=1 SV=1	0	6.679	29	3	3	3	1	119	13.4	9.94	2.67	3
FALSE	High	Master Protein	H7C0N4	Splicing factor 1 (Fragment) OS=Homo sapiens OX=9606 GN=SF1 PE=1 SV=1	0	6.314	22	3	5	3	1	180	18.7	9.57	8.72	3
FALSE	High	Master Protein	A0A0G2JIW1	Heat shock 70 kDa protein 1B OS=Homo sapiens OX=9606 GN=HSPA1B PE=1 SV=1	0	6.265	6	3	3	3	1	642	70.1	5.66	2.55	3
FALSE	High	Master Protein	B7Z6Z4	cDNA FLJ56329, highly similar to Myosin light polypeptide 6 OS=Homo sapiens OX=9606 GN=MYL6 PE=1 SV=1	0	6.168	15	3	3	3	1	238	26.7	5.08	4.17	3
FALSE	High	Master Protein	E7EQ64	Trypsin-1 OS=Homo sapiens OX=9606 GN=PRSS1 PE=1 SV=1	0	6.163	7	2	24	2	1	261	28.1	7.25	29.28	2
FALSE	High	Master Protein	P31151	Protein S100-A7 OS=Homo sapiens OX=9606 GN=S100A7 PE=1 SV=4	0	6.121	25	2	3	2	1	101	11.5	6.77	2.48	2
FALSE	High	Master Protein	P17096	High mobility group protein HMG-I/HMG-Y OS=Homo sapiens OX=9606 GN=HMGA1 PE=1 SV=3	0	6.059	23	2	3	2	1	107	11.7	10.32	4.93	2
FALSE	High	Master Protein	P21912	Succinate dehydrogenase [ubiquinone] iron-sulfur subunit, mitochondrial OS=Homo sapiens OX=9606 GN=SDHB PE=1 SV=3	0	6.044	11	3	3	3	1	280	31.6	8.76	1.99	3
FALSE	High	Master Protein	A0A0C4DG89	Probable ATP-dependent RNA helicase DDX46 OS=Homo sapiens OX=9606 GN=DDX46 PE=1 SV=1	0	6.004	5	4	4	4	1	1032	117.4	9.29	2.13	4
FALSE	High	Master Protein	P61978	Heterogeneous nuclear ribonucleoprotein K OS=Homo sapiens OX=9606 GN=HNRNPK PE=1 SV=1	0	5.972	7	2	3	2	1	463	50.9	5.54	7.77	2
FALSE	High	Master Protein	U3KQK0	Histone H2B OS=Homo sapiens OX=9606 GN=HIST1H2BN PE=1 SV=1	0	5.92	16	2	3	2	1	166	18.8	10.54	4.6	2
FALSE	High	Master Protein	P47813	Eukaryotic translation initiation factor 1A, X-chromosomal OS=Homo sapiens OX=9606 GN=EIF1AX PE=1 SV=2	0	5.852	19	3	3	3	1	144	16.5	5.24	4.69	3
FALSE	High	Master Protein	F8W726	Ubiquitin-associated protein 2-like OS=Homo sapiens OX=9606 GN=UBAP2L PE=1 SV=2	0	5.646	3	3	3	3	1	1079	113.6	6.68	4.16	3
FALSE	High	Master Protein	P35579	Myosin-9 OS=Homo sapiens OX=9606 GN=MYH9 PE=1 SV=4	0	5.508	2	3	4	3	1	1960	226.4	5.6	4.26	3
FALSE	High	Master Protein	P63173	60S ribosomal protein L38 OS=Homo sapiens OX=9606 GN=RPL38 PE=1 SV=2	0	5.469	36	2	3	2	1	70	8.2	10.1	5.29	2
FALSE	High	Master Protein	P11021	Endoplasmic reticulum chaperone BiP OS=Homo sapiens OX=9606 GN=HSPA5 PE=1 SV=2	0	5.412	8	3	3	3	1	654	72.3	5.16	4.9	3
FALSE	High	Master Protein	Q99497	Protein/nucleic acid deglycase DJ-1 OS=Homo sapiens OX=9606 GN=PARK7 PE=1 SV=2	0	5.383	21	2	2	2	1	189	19.9	6.79	6.94	2
FALSE	High	Master Protein	Q7Z5J4	Retinoic acid-induced protein 1 OS=Homo sapiens OX=9606 GN=RAI1 PE=1 SV=2	0	5.365	4	4	4	4	1	1906	203.2	8.79	1.94	4
FALSE	High	Master Protein	O14497	AT-rich interactive domain-containing protein 1A OS=Homo sapiens OX=9606 GN=ARID1A PE=1 SV=3	0	5.04	2	3	4	3	1	2285	241.9	6.7	6.7	3
FALSE	High	Master Protein	P62917	60S ribosomal protein L8 OS=Homo sapiens OX=9606 GN=RPL8 PE=1 SV=2	0	4.996	6	1	2	1	1	257	28	11.03	1.76	1
FALSE	High	Master Protein	Q1KMD3	Heterogeneous nuclear ribonucleoprotein U-like protein 2 OS=Homo sapiens OX=9606 GN=HNRNPUL2 PE=1 SV=1	0	4.829	5	3	3	3	1	747	85.1	4.91	5.09	3
FALSE	High	Master Protein	A0A0U1RRH7	Histone H2A OS=Homo sapiens OX=9606 PE=3 SV=1	0	4.792	16	2	3	2	1	170	18.5	11.52	7.7	2
FALSE	High	Master Protein	O75340	Programmed cell death protein 6 OS=Homo sapiens OX=9606 GN=PDCD6 PE=1 SV=1	0	4.732	11	2	2	2	1	191	21.9	5.4	3.87	2
FALSE	High	Master Protein	P05141	ADP/ATP translocase 2 OS=Homo sapiens OX=9606 GN=SLC25A5 PE=1 SV=7	0	4.69	12	3	3	1	1	298	32.8	9.69	5.23	3
FALSE	High	Master Protein	Q86X55	Histone-arginine methyltransferase CARM1 OS=Homo sapiens OX=9606 GN=CARM1 PE=1 SV=3	0	4.479	6	2	2	2	1	608	65.8	6.73	4.47	2
FALSE	High	Master Protein	Q9NQ29	Putative RNA-binding protein Luc7-like 1 OS=Homo sapiens OX=9606 GN=LUC7L PE=1 SV=1	0	4.362	8	3	3	1	1	371	43.7	9.92	3.96	3
FALSE	High	Master Protein	Q08380	Galectin-3-binding protein OS=Homo sapiens OX=9606 GN=LGALS3BP PE=1 SV=1	0	4.292	4	2	2	2	1	585	65.3	5.27	2.63	2
FALSE	High	Master Protein	Q9NX20	39S ribosomal protein L16, mitochondrial OS=Homo sapiens OX=9606 GN=MRPL16 PE=1 SV=1	0	4.165	8	2	2	2	1	251	28.4	10.13	4.29	2
FALSE	High	Master Protein	P62753	40S ribosomal protein S6 OS=Homo sapiens OX=9606 GN=RPS6 PE=1 SV=1	0	4.121	12	2	3	2	1	249	28.7	10.84	5.29	2
FALSE	High	Master Protein	D6REE5	Receptor of-activated protein C kinase 1 (Fragment) OS=Homo sapiens OX=9606 GN=RACK1 PE=1 SV=1	0	4.077	5	1	1	1	1	321	34.9	6.83	2.08	1
FALSE	High	Master Protein	P52943	Cysteine-rich protein 2 OS=Homo sapiens OX=9606 GN=CRIP2 PE=1 SV=1	0	4.062	26	3	3	3	1	208	22.5	8.72	5.2	3
FALSE	High	Master Protein	P00966	Argininosuccinate synthase OS=Homo sapiens OX=9606 GN=ASS1 PE=1 SV=2	0	3.978	7	3	3	3	1	412	46.5	8.02	2.03	3
FALSE	High	Master Protein	P00338	L-lactate dehydrogenase A chain OS=Homo sapiens OX=9606 GN=LDHA PE=1 SV=2	0	3.943	7	2	2	2	1	332	36.7	8.27	2	2
FALSE	High	Master Protein	P14618	Pyruvate kinase PKM OS=Homo sapiens OX=9606 GN=PKM PE=1 SV=4	0	3.861	4	2	2	2	1	531	57.9	7.84	2.2	2
FALSE	High	Master Protein	E9PEB5	Far upstream element-binding protein 1 OS=Homo sapiens OX=9606 GN=FUBP1 PE=1 SV=1	0	3.827	4	2	2	1	1	655	68.9	7.93	1.61	2
FALSE	High	Master Protein	P28482	Mitogen-activated protein kinase 1 OS=Homo sapiens OX=9606 GN=MAPK1 PE=1 SV=3	0	3.777	7	3	3	3	1	360	41.4	6.98	0	3
FALSE	High	Master Protein	Q9BRJ7	Tudor-interacting repair regulator protein OS=Homo sapiens OX=9606 GN=NUDT16L1 PE=1 SV=1	0	3.688	13	2	2	2	1	211	23.3	8.91	4.5	2
FALSE	High	Master Protein	P62081	40S ribosomal protein S7 OS=Homo sapiens OX=9606 GN=RPS7 PE=1 SV=1	0	3.629	14	3	3	3	1	194	22.1	10.1	1.7	3
FALSE	High	Master Protein	Q96I24	Far upstream element-binding protein 3 OS=Homo sapiens OX=9606 GN=FUBP3 PE=1 SV=2	0	3.569	6	3	3	2	1	572	61.6	8.38	1.61	3
FALSE	High	Master Protein	Q01085	Nucleolysin TIAR OS=Homo sapiens OX=9606 GN=TIAL1 PE=1 SV=1	0	3.478	5	2	2	1	1	375	41.6	7.74	2.59	2
FALSE	High	Master Protein	P16401	Histone H1.5 OS=Homo sapiens OX=9606 GN=HIST1H1B PE=1 SV=3	0	3.432	12	2	3	2	1	226	22.6	10.92	6.51	2
FALSE	High	Master Protein	P57721	Poly(rC)-binding protein 3 OS=Homo sapiens OX=9606 GN=PCBP3 PE=2 SV=2	0	3.388	7	2	2	2	1	371	39.4	8.07	4.13	2
FALSE	High	Master Protein	J3KPS3	Fructose-bisphosphate aldolase OS=Homo sapiens OX=9606 GN=ALDOA PE=1 SV=1	0	3.379	7	2	2	2	1	368	39.8	8.09	3.96	2
FALSE	High	Master Protein	Q02413	Desmoglein-1 OS=Homo sapiens OX=9606 GN=DSG1 PE=1 SV=2	0	3.272	3	2	2	2	1	1049	113.7	5.03	2.41	2
FALSE	High	Master Protein	P05109	Protein S100-A8 OS=Homo sapiens OX=9606 GN=S100A8 PE=1 SV=1	0	3.259	25	2	2	2	1	93	10.8	7.03	1.76	2
FALSE	High	Master Protein	P26373	60S ribosomal protein L13 OS=Homo sapiens OX=9606 GN=RPL13 PE=1 SV=4	0	3.247	11	2	2	2	1	211	24.2	11.65	3.28	2
FALSE	High	Master Protein	P62277	40S ribosomal protein S13 OS=Homo sapiens OX=9606 GN=RPS13 PE=1 SV=2	0	3.139	13	2	2	2	1	151	17.2	10.54	2.77	2
FALSE	High	Master Protein	P62273	40S ribosomal protein S29 OS=Homo sapiens OX=9606 GN=RPS29 PE=1 SV=2	0	2.993	29	2	9	2	1	56	6.7	10.13	2.49	2
FALSE	High	Master Protein	Q5D862	Filaggrin-2 OS=Homo sapiens OX=9606 GN=FLG2 PE=1 SV=1	0	2.966	1	2	2	2	1	2391	247.9	8.31	3.83	2
FALSE	High	Master Protein	Q6IPX4	40S ribosomal protein S16 OS=Homo sapiens OX=9606 GN=RPS16 PE=1 SV=1	0	2.955	14	2	2	2	1	152	17.1	10.96	1.7	2
FALSE	High	Master Protein	Q14444	Caprin-1 OS=Homo sapiens OX=9606 GN=CAPRIN1 PE=1 SV=2	0	2.934	3	2	2	2	1	709	78.3	5.25	1.88	2
FALSE	High	Master Protein	Q00325	Phosphate carrier protein, mitochondrial OS=Homo sapiens OX=9606 GN=SLC25A3 PE=1 SV=2	0	2.857	8	2	2	2	1	362	40.1	9.38	2.04	2
FALSE	High	Master Protein	P49411	Elongation factor Tu, mitochondrial OS=Homo sapiens OX=9606 GN=TUFM PE=1 SV=2	0	2.849	7	2	2	2	1	452	49.5	7.61	0	2
FALSE	High	Master Protein	A0A0A6YYL6	Protein RPL17-C18orf32 OS=Homo sapiens OX=9606 GN=RPL17-C18orf32 PE=3 SV=1	0	2.818	9	2	2	2	1	228	26.4	10.1	2.75	2
FALSE	High	Master Protein	P38646	Stress-70 protein, mitochondrial OS=Homo sapiens OX=9606 GN=HSPA9 PE=1 SV=2	0	2.771	2	1	1	1	1	679	73.6	6.16	1.95	1
FALSE	High	Master Protein	Q5T749	Keratinocyte proline-rich protein OS=Homo sapiens OX=9606 GN=KPRP PE=1 SV=1	0	2.735	4	2	2	2	1	579	64.1	8.27	2.11	2
FALSE	High	Master Protein	P06576	ATP synthase subunit beta, mitochondrial OS=Homo sapiens OX=9606 GN=ATP5F1B PE=1 SV=3	0	2.699	3	1	1	1	1	529	56.5	5.4	2.21	1
FALSE	High	Master Protein	P62244	40S ribosomal protein S15a OS=Homo sapiens OX=9606 GN=RPS15A PE=1 SV=2	0	2.694	14	2	2	2	1	130	14.8	10.13	2.05	2
FALSE	High	Master Protein	P20618	Proteasome subunit beta type-1 OS=Homo sapiens OX=9606 GN=PSMB1 PE=1 SV=2	0	2.655	4	1	2	1	1	241	26.5	8.13	1.79	1
FALSE	High	Master Protein	Q15365	Poly(rC)-binding protein 1 OS=Homo sapiens OX=9606 GN=PCBP1 PE=1 SV=2	0	2.62	8	2	2	2	1	356	37.5	7.09	1.95	2
FALSE	High	Master Protein	P14923	Junction plakoglobin OS=Homo sapiens OX=9606 GN=JUP PE=1 SV=3	0	2.614	4	2	2	2	1	745	81.7	6.14	2.18	2
FALSE	High	Master Protein	Q6PJT7	Zinc finger CCCH domain-containing protein 14 OS=Homo sapiens OX=9606 GN=ZC3H14 PE=1 SV=1	0	2.587	2	2	2	2	1	736	82.8	7.31	2.21	2
FALSE	High	Master Protein	P31327	Carbamoyl-phosphate synthase [ammonia], mitochondrial OS=Homo sapiens OX=9606 GN=CPS1 PE=1 SV=2	0	2.516	1	1	1	1	1	1500	164.8	6.74	0	1
FALSE	High	Master Protein	P61313	60S ribosomal protein L15 OS=Homo sapiens OX=9606 GN=RPL15 PE=1 SV=2	0	2.505	12	2	2	2	1	204	24.1	11.62	0	2
FALSE	High	Master Protein	P16455	Methylated-DNA--protein-cysteine methyltransferase OS=Homo sapiens OX=9606 GN=MGMT PE=1 SV=1	0	2.451	9	1	1	1	1	207	21.6	8.1	2.27	1
FALSE	High	Master Protein	Q9Y305	Acyl-coenzyme A thioesterase 9, mitochondrial OS=Homo sapiens OX=9606 GN=ACOT9 PE=1 SV=2	0	2.427	4	2	2	2	1	439	49.9	8.6	0	2
FALSE	High	Master Protein	P53999	Activated RNA polymerase II transcriptional coactivator p15 OS=Homo sapiens OX=9606 GN=SUB1 PE=1 SV=3	0	2.425	10	1	1	1	1	127	14.4	9.6	2.53	1
FALSE	High	Master Protein	P30048	Thioredoxin-dependent peroxide reductase, mitochondrial OS=Homo sapiens OX=9606 GN=PRDX3 PE=1 SV=3	0	2.422	9	2	2	2	1	256	27.7	7.78	0	2
FALSE	High	Master Protein	Q9Y6Q9	Nuclear receptor coactivator 3 OS=Homo sapiens OX=9606 GN=NCOA3 PE=1 SV=1	0	2.399	2	2	2	2	1	1424	155.2	7.47	3.67	2
FALSE	High	Master Protein	Q14532	Keratin, type I cuticular Ha2 OS=Homo sapiens OX=9606 GN=KRT32 PE=2 SV=3	0	2.364	5	2	2	2	1	448	50.3	4.84	1.72	2
FALSE	High	Master Protein	Q05519	Serine/arginine-rich splicing factor 11 OS=Homo sapiens OX=9606 GN=SRSF11 PE=1 SV=1	0	2.341	3	1	1	1	1	484	53.5	10.52	0	1
FALSE	High	Master Protein	Q9UPN9	E3 ubiquitin-protein ligase TRIM33 OS=Homo sapiens OX=9606 GN=TRIM33 PE=1 SV=3	0	2.33	1	1	1	1	1	1127	122.5	6.67	1.66	1
FALSE	High	Master Protein	Q6P1L8	39S ribosomal protein L14, mitochondrial OS=Homo sapiens OX=9606 GN=MRPL14 PE=1 SV=1	0	2.327	15	2	2	2	1	145	15.9	10.24	0	2
FALSE	High	Master Protein	P05204	Non-histone chromosomal protein HMG-17 OS=Homo sapiens OX=9606 GN=HMGN2 PE=1 SV=3	0	2.299	17	1	1	1	1	90	9.4	9.99	0	1
FALSE	High	Master Protein	Q9Y2S6	Translation machinery-associated protein 7 OS=Homo sapiens OX=9606 GN=TMA7 PE=1 SV=1	0	2.265	22	1	1	1	1	64	7.1	9.99	2.23	1
FALSE	High	Master Protein	P27635	60S ribosomal protein L10 OS=Homo sapiens OX=9606 GN=RPL10 PE=1 SV=4	0	2.263	11	2	2	2	1	214	24.6	10.08	0	2
FALSE	High	Master Protein	P36542	ATP synthase subunit gamma, mitochondrial OS=Homo sapiens OX=9606 GN=ATP5F1C PE=1 SV=1	0	2.256	4	1	1	1	1	298	33	9.22	1.77	1
FALSE	High	Master Protein	A0A024R4M0	40S ribosomal protein S9 OS=Homo sapiens OX=9606 GN=RPS9 PE=1 SV=1	0	2.25	10	2	2	2	1	194	22.6	10.65	1.82	2
FALSE	High	Master Protein	O75531	Barrier-to-autointegration factor OS=Homo sapiens OX=9606 GN=BANF1 PE=1 SV=1	0	2.239	13	1	1	1	1	89	10.1	6.09	2.59	1
FALSE	High	Master Protein	Q99590	Protein SCAF11 OS=Homo sapiens OX=9606 GN=SCAF11 PE=1 SV=2	0	2.227	1	1	1	1	1	1463	164.6	8.41	2.12	1
FALSE	High	Master Protein	F8VXC8	SWI/SNF complex subunit SMARCC2 OS=Homo sapiens OX=9606 GN=SMARCC2 PE=1 SV=1	0	2.212	1	1	1	1	1	1245	136.1	5.71	1.87	1
FALSE	High	Master Protein	P54886	Delta-1-pyrroline-5-carboxylate synthase OS=Homo sapiens OX=9606 GN=ALDH18A1 PE=1 SV=2	0	2.197	2	1	1	1	1	795	87.2	7.12	2.38	1
FALSE	High	Master Protein	P04792	Heat shock protein beta-1 OS=Homo sapiens OX=9606 GN=HSPB1 PE=1 SV=2	0	2.171	10	2	2	2	1	205	22.8	6.4	3.45	2
FALSE	High	Master Protein	P62913	60S ribosomal protein L11 OS=Homo sapiens OX=9606 GN=RPL11 PE=1 SV=2	0	2.167	10	1	2	1	1	178	20.2	9.6	2.48	1
FALSE	High	Master Protein	Q9UBV8	Peflin OS=Homo sapiens OX=9606 GN=PEF1 PE=1 SV=1	0	2.146	6	1	1	1	1	284	30.4	6.54	2.79	1
FALSE	High	Master Protein	F8W727	60S ribosomal protein L32 OS=Homo sapiens OX=9606 GN=RPL32 PE=1 SV=1	0	2.12	8	1	1	1	1	153	18	10.59	1.86	1
FALSE	High	Master Protein	A0A087WZE9	High mobility group nucleosome-binding domain-containing protein 3 OS=Homo sapiens OX=9606 GN=HMGN3 PE=1 SV=1	0	2.114	12	1	1	1	1	130	13.9	9.91	0	1
FALSE	High	Master Protein	P00558	Phosphoglycerate kinase 1 OS=Homo sapiens OX=9606 GN=PGK1 PE=1 SV=3	0	2.113	4	1	1	1	1	417	44.6	8.1	2.24	1
FALSE	High	Master Protein	P14854	Cytochrome c oxidase subunit 6B1 OS=Homo sapiens OX=9606 GN=COX6B1 PE=1 SV=2	0	2.094	13	1	1	1	1	86	10.2	7.05	2.66	1
FALSE	High	Master Protein	O43175	D-3-phosphoglycerate dehydrogenase OS=Homo sapiens OX=9606 GN=PHGDH PE=1 SV=4	0	2.048	3	1	1	1	1	533	56.6	6.71	2.12	1
FALSE	High	Master Protein	E9PB61	THO complex subunit 4 OS=Homo sapiens OX=9606 GN=ALYREF PE=1 SV=1	0	2.044	4	1	1	1	1	264	27.5	11.05	0	1
FALSE	High	Master Protein	P34897	Serine hydroxymethyltransferase, mitochondrial OS=Homo sapiens OX=9606 GN=SHMT2 PE=1 SV=3	0	2.019	2	1	1	1	1	504	56	8.53	0	1
FALSE	High	Master Protein	P32119	Peroxiredoxin-2 OS=Homo sapiens OX=9606 GN=PRDX2 PE=1 SV=5	0	2.004	9	1	1	1	1	198	21.9	5.97	0	1
FALSE	High	Master Protein	Q9UHX1	Poly(U)-binding-splicing factor PUF60 OS=Homo sapiens OX=9606 GN=PUF60 PE=1 SV=1	0	1.993	2	1	1	1	1	559	59.8	5.29	1.73	1
FALSE	High	Master Protein	P18124	60S ribosomal protein L7 OS=Homo sapiens OX=9606 GN=RPL7 PE=1 SV=1	0	1.965	4	1	1	1	1	248	29.2	10.65	2.11	1
FALSE	High	Master Protein	Q15532	Protein SSXT OS=Homo sapiens OX=9606 GN=SS18 PE=1 SV=3	0	1.919	3	1	1	1	1	418	45.9	6.46	2.09	1
FALSE	High	Master Protein	Q7L4I2	Arginine/serine-rich coiled-coil protein 2 OS=Homo sapiens OX=9606 GN=RSRC2 PE=1 SV=1	0	1.918	3	1	1	1	1	434	50.5	11.33	1.71	1
FALSE	High	Master Protein	P79522	Proline-rich protein 3 OS=Homo sapiens OX=9606 GN=PRR3 PE=1 SV=2	0	1.917	9	1	1	1	1	188	20.6	9.83	1.69	1
FALSE	High	Master Protein	P07900	Heat shock protein HSP 90-alpha OS=Homo sapiens OX=9606 GN=HSP90AA1 PE=1 SV=5	0	1.917	2	1	1	1	1	732	84.6	5.02	1.63	1
FALSE	High	Master Protein	Q14980	Nuclear mitotic apparatus protein 1 OS=Homo sapiens OX=9606 GN=NUMA1 PE=1 SV=2	0	1.901	1	1	1	1	1	2115	238.1	5.78	0	1
FALSE	High	Master Protein	Q15654	Thyroid receptor-interacting protein 6 OS=Homo sapiens OX=9606 GN=TRIP6 PE=1 SV=3	0	1.854	4	1	1	1	1	476	50.3	7.37	0	1
FALSE	High	Master Protein	Q9NUI1	Peroxisomal 2,4-dienoyl-CoA reductase OS=Homo sapiens OX=9606 GN=DECR2 PE=1 SV=1	0	1.836	4	1	1	1	1	292	30.8	9.22	1.74	1
FALSE	High	Master Protein	Q9P1Z2	Calcium-binding and coiled-coil domain-containing protein 1 OS=Homo sapiens OX=9606 GN=CALCOCO1 PE=1 SV=2	0	1.796	2	1	1	1	1	691	77.3	4.82	2.05	1
FALSE	High	Master Protein	P14174	Macrophage migration inhibitory factor OS=Homo sapiens OX=9606 GN=MIF PE=1 SV=4	0	1.778	8	1	2	1	1	115	12.5	7.88	1.72	1
FALSE	High	Master Protein	P25398	40S ribosomal protein S12 OS=Homo sapiens OX=9606 GN=RPS12 PE=1 SV=3	0	1.778	11	1	1	1	1	132	14.5	7.21	2.33	1
FALSE	High	Master Protein	P62266	40S ribosomal protein S23 OS=Homo sapiens OX=9606 GN=RPS23 PE=1 SV=3	0	1.773	8	1	1	1	1	143	15.8	10.49	2.18	1
FALSE	High	Master Protein	P52294	Importin subunit alpha-5 OS=Homo sapiens OX=9606 GN=KPNA1 PE=1 SV=3	0	1.747	2	1	1	1	1	538	60.2	5.01	2.72	1
FALSE	High	Master Protein	P09669	Cytochrome c oxidase subunit 6C OS=Homo sapiens OX=9606 GN=COX6C PE=1 SV=2	0	1.734	13	1	1	1	1	75	8.8	10.39	2.2	1
FALSE	High	Master Protein	D6RBT3	NADH dehydrogenase [ubiquinone] iron-sulfur protein 6, mitochondrial OS=Homo sapiens OX=9606 GN=NDUFS6 PE=1 SV=1	0	1.732	9	1	1	1	1	172	18.7	8.72	0	1
FALSE	High	Master Protein	J3KQN4	60S ribosomal protein L36a OS=Homo sapiens OX=9606 GN=RPL36A PE=1 SV=1	0	1.728	6	1	1	1	1	142	16.4	10.43	1.67	1
FALSE	High	Master Protein	P60174	Triosephosphate isomerase OS=Homo sapiens OX=9606 GN=TPI1 PE=1 SV=3	0	1.718	5	1	1	1	1	286	30.8	5.92	0	1
FALSE	High	Master Protein	Q13263	Transcription intermediary factor 1-beta OS=Homo sapiens OX=9606 GN=TRIM28 PE=1 SV=5	0	1.713	2	1	1	1	1	835	88.5	5.77	2.72	1
FALSE	High	Master Protein	P10809	60 kDa heat shock protein, mitochondrial OS=Homo sapiens OX=9606 GN=HSPD1 PE=1 SV=2	0	1.684	2	1	1	1	1	573	61	5.87	0	1
FALSE	High	Master Protein	P35609	Alpha-actinin-2 OS=Homo sapiens OX=9606 GN=ACTN2 PE=1 SV=1	0	1.662	1	1	1	1	1	894	103.8	5.45	1.68	1
FALSE	High	Master Protein	E9PK25	Cofilin-1 OS=Homo sapiens OX=9606 GN=CFL1 PE=1 SV=1	0	1.64	7	1	1	1	1	204	22.7	8.34	2.85	1
FALSE	High	Master Protein	P62424	60S ribosomal protein L7a OS=Homo sapiens OX=9606 GN=RPL7A PE=1 SV=2	0	1.638	5	1	1	1	1	266	30	10.61	0	1
FALSE	High	Master Protein	K7ELC2	40S ribosomal protein S15 OS=Homo sapiens OX=9606 GN=RPS15 PE=1 SV=1	0	1.608	18	1	1	1	1	152	17.7	10.39	0	1
FALSE	High	Master Protein	Q96AG4	Leucine-rich repeat-containing protein 59 OS=Homo sapiens OX=9606 GN=LRRC59 PE=1 SV=1	0	1.591	4	1	1	1	1	307	34.9	9.57	2.34	1
FALSE	High	Master Protein	P09211	Glutathione S-transferase P OS=Homo sapiens OX=9606 GN=GSTP1 PE=1 SV=2	0	1.585	10	1	1	1	1	210	23.3	5.64	0	1
FALSE	High	Master Protein	P33992	DNA replication licensing factor MCM5 OS=Homo sapiens OX=9606 GN=MCM5 PE=1 SV=5	0	1.566	2	1	1	1	1	734	82.2	8.37	1.69	1
FALSE	High	Master Protein	P08670	Vimentin OS=Homo sapiens OX=9606 GN=VIM PE=1 SV=4	0	1.547	3	1	1	1	1	466	53.6	5.12	0	1
FALSE	High	Master Protein	Q9BRP1	Programmed cell death protein 2-like OS=Homo sapiens OX=9606 GN=PDCD2L PE=1 SV=1	0	1.537	3	1	1	1	1	358	39.4	4.86	1.68	1
FALSE	High	Master Protein	S4R3N1	HSPE1-MOB4 readthrough OS=Homo sapiens OX=9606 GN=HSPE1-MOB4 PE=3 SV=1	0	1.536	5	1	1	1	1	261	29.7	6.16	2	1
FALSE	High	Master Protein	P12273	Prolactin-inducible protein OS=Homo sapiens OX=9606 GN=PIP PE=1 SV=1	0	1.534	8	1	1	1	1	146	16.6	8.05	1.77	1
FALSE	High	Master Protein	E9PR30	40S ribosomal protein S30 OS=Homo sapiens OX=9606 GN=FAU PE=1 SV=1	0	1.509	10	1	1	1	1	98	10.9	11.56	2.1	1
FALSE	High	Master Protein	P61247	40S ribosomal protein S3a OS=Homo sapiens OX=9606 GN=RPS3A PE=1 SV=2	0	1.499	5	1	1	1	1	264	29.9	9.73	0	1
FALSE	High	Master Protein	P0C7P0	CDGSH iron-sulfur domain-containing protein 3, mitochondrial OS=Homo sapiens OX=9606 GN=CISD3 PE=1 SV=1	0	1.483	9	1	1	1	1	127	14.2	10.55	0	1
FALSE	High	Master Protein	P46776	60S ribosomal protein L27a OS=Homo sapiens OX=9606 GN=RPL27A PE=1 SV=2	0	1.466	7	1	1	1	1	148	16.6	11	1.91	1
FALSE	High	Master Protein	A0A2R8Y422	Uncharacterized protein OS=Homo sapiens OX=9606 PE=4 SV=1	0	1.441	6	1	1	1	1	156	18	9.47	1.94	1
FALSE	High	Master Protein	Q15084	Protein disulfide-isomerase A6 OS=Homo sapiens OX=9606 GN=PDIA6 PE=1 SV=1	0	1.409	3	1	1	1	1	440	48.1	5.08	2.42	1
FALSE	High	Master Protein	P35625	Metalloproteinase inhibitor 3 OS=Homo sapiens OX=9606 GN=TIMP3 PE=1 SV=2	0	1.382	4	1	1	1	1	211	24.1	8.72	1.76	1
FALSE	High	Master Protein	P05187	Alkaline phosphatase, placental type OS=Homo sapiens OX=9606 GN=ALPP PE=1 SV=2	0	1.378	4	1	1	1	1	535	57.9	6.29	2.77	1
FALSE	High	Master Protein	P38159	RNA-binding motif protein, X chromosome OS=Homo sapiens OX=9606 GN=RBMX PE=1 SV=3	0	1.369	4	1	1	1	1	391	42.3	10.05	0	1
FALSE	High	Master Protein	P56537	Eukaryotic translation initiation factor 6 OS=Homo sapiens OX=9606 GN=EIF6 PE=1 SV=1	0	1.344	7	1	1	1	1	245	26.6	4.68	2.94	1
FALSE	High	Master Protein	Q14240	Eukaryotic initiation factor 4A-II OS=Homo sapiens OX=9606 GN=EIF4A2 PE=1 SV=2	0	1.337	2	1	1	1	1	407	46.4	5.48	1.84	1
FALSE	High	Master Protein	O00522	Krev interaction trapped protein 1 OS=Homo sapiens OX=9606 GN=KRIT1 PE=1 SV=2	0	1.332	1	1	1	1	1	736	84.3	8.41	1.76	1
FALSE	High	Master Protein	H7C0C1	Uncharacterized protein (Fragment) OS=Homo sapiens OX=9606 PE=4 SV=2	0	1.329	5	1	1	1	1	242	26.8	9.45	1.96	1
FALSE	High	Master Protein	P37108	Signal recognition particle 14 kDa protein OS=Homo sapiens OX=9606 GN=SRP14 PE=1 SV=2	0	1.323	7	1	1	1	1	136	14.6	10.04	0	1
FALSE	High	Master Protein	Q9UBX7	Kallikrein-11 OS=Homo sapiens OX=9606 GN=KLK11 PE=1 SV=2	0	1.315	2	1	7	1	1	282	31	8.94	10.67	1
FALSE	High	Master Protein	P50454	Serpin H1 OS=Homo sapiens OX=9606 GN=SERPINH1 PE=1 SV=2	0	1.311	4	1	1	1	1	418	46.4	8.69	2.37	1
FALSE	High	Master Protein	E7EWS1	Ankyrin and armadillo repeat-containing protein OS=Homo sapiens OX=9606 GN=ANKAR PE=1 SV=1	0	1.307	1	1	1	1	1	1009	114.5	8.02	1.97	1
FALSE	High	Master Protein	Q9Y446	Plakophilin-3 OS=Homo sapiens OX=9606 GN=PKP3 PE=1 SV=1	0	1.305	1	1	1	1	1	797	87	9.32	1.83	1
FALSE	High	Master Protein	B7Z4C8	cDNA FLJ57527, highly similar to 60S ribosomal protein L31 OS=Homo sapiens OX=9606 GN=RPL31 PE=1 SV=1	0	1.301	7	1	1	1	1	130	15.1	10.37	1.82	1
FALSE	High	Master Protein	Q8N1N4	Keratin, type II cytoskeletal 78 OS=Homo sapiens OX=9606 GN=KRT78 PE=1 SV=2	0	1.298	3	1	1	1	1	520	56.8	6.02	0	1
FALSE	High	Master Protein	Q16629	Serine/arginine-rich splicing factor 7 OS=Homo sapiens OX=9606 GN=SRSF7 PE=1 SV=1	0	1.291	7	1	1	1	1	238	27.4	11.82	0	1
FALSE	High	Master Protein	O95429	BAG family molecular chaperone regulator 4 OS=Homo sapiens OX=9606 GN=BAG4 PE=1 SV=1	0.001	1.287	2	1	1	1	1	457	49.6	5.12	0	1
FALSE	High	Master Protein	O95486	Protein transport protein Sec24A OS=Homo sapiens OX=9606 GN=SEC24A PE=1 SV=2	0.001	1.287	1	1	1	1	1	1093	119.7	7.66	1.92	1
FALSE	High	Master Protein	Q68BL7	Olfactomedin-like protein 2A OS=Homo sapiens OX=9606 GN=OLFML2A PE=2 SV=1	0.002	1.262	2	1	1	1	1	652	73	7.81	1.93	1
FALSE	High	Master Protein	P00451	Coagulation factor VIII OS=Homo sapiens OX=9606 GN=F8 PE=1 SV=1	0.002	1.258	0	1	1	1	1	2351	266.8	7.36	0	1
FALSE	High	Master Protein	A0A0U1RQM0	Uncharacterized protein OS=Homo sapiens OX=9606 PE=1 SV=1	0.002	1.25	16	1	1	1	1	116	12.7	10.24	0	1
FALSE	High	Master Protein	P00387	NADH-cytochrome b5 reductase 3 OS=Homo sapiens OX=9606 GN=CYB5R3 PE=1 SV=3	0.002	1.239	4	1	1	1	1	301	34.2	7.59	0	1
FALSE	High	Master Protein	P62891	60S ribosomal protein L39 OS=Homo sapiens OX=9606 GN=RPL39 PE=1 SV=2	0.002	1.233	20	1	1	1	1	51	6.4	12.56	0	1
FALSE	High	Master Protein	A0A0A0MQX8	Muscleblind-like protein 1 OS=Homo sapiens OX=9606 GN=MBNL1 PE=1 SV=1	0.002	1.223	2	1	1	1	1	400	43	8.82	1.75	1
FALSE	High	Master Protein	P78357	Contactin-associated protein 1 OS=Homo sapiens OX=9606 GN=CNTNAP1 PE=1 SV=1	0.002	1.222	1	1	1	1	1	1384	156.2	7.05	0	1
FALSE	High	Master Protein	O00622	Protein CYR61 OS=Homo sapiens OX=9606 GN=CYR61 PE=1 SV=1	0.002	1.217	2	1	1	1	1	381	42	8.21	0	1
FALSE	High	Master Protein	A0A2R8Y7X9	Uncharacterized protein OS=Homo sapiens OX=9606 PE=3 SV=1	0.002	1.199	6	1	1	1	1	168	18.4	6.96	1.67	1
FALSE	High	Master Protein	Q9P021	Cysteine-rich PDZ-binding protein OS=Homo sapiens OX=9606 GN=CRIPT PE=1 SV=1	0.002	1.192	11	1	1	1	1	101	11.2	9.47	0	1
FALSE	High	Master Protein	Q8NFD5	AT-rich interactive domain-containing protein 1B OS=Homo sapiens OX=9606 GN=ARID1B PE=1 SV=2	0.002	1.185	1	1	1	1	1	2236	236	6.73	0	1
FALSE	High	Master Protein	O95573	Long-chain-fatty-acid--CoA ligase 3 OS=Homo sapiens OX=9606 GN=ACSL3 PE=1 SV=3	0.002	1.18	2	1	1	1	1	720	80.4	8.38	0	1
FALSE	High	Master Protein	Q9C037	E3 ubiquitin-protein ligase TRIM4 OS=Homo sapiens OX=9606 GN=TRIM4 PE=1 SV=2	0.002	1.178	3	1	1	1	1	500	57.4	8.1	1.98	1
FALSE	High	Master Protein	Q8NBX0	Saccharopine dehydrogenase-like oxidoreductase OS=Homo sapiens OX=9606 GN=SCCPDH PE=1 SV=1	0.002	1.175	3	1	1	1	1	429	47.1	9.14	0	1
FALSE	High	Master Protein	G5E9Q6	Profilin OS=Homo sapiens OX=9606 GN=PFN2 PE=1 SV=1	0.002	1.164	7	1	1	1	1	188	20.8	7.52	1.67	1
FALSE	High	Master Protein	Q9UGT4	Sushi domain-containing protein 2 OS=Homo sapiens OX=9606 GN=SUSD2 PE=1 SV=1	0.002	1.151	1	1	1	1	1	822	90.2	6.28	0	1
FALSE	High	Master Protein	P05386	60S acidic ribosomal protein P1 OS=Homo sapiens OX=9606 GN=RPLP1 PE=1 SV=1	0.002	1.149	14	1	1	1	1	114	11.5	4.32	2.18	1
FALSE	High	Master Protein	P57088	Transmembrane protein 33 OS=Homo sapiens OX=9606 GN=TMEM33 PE=1 SV=2	0.002	1.147	5	1	1	1	1	247	28	9.7	1.69	1
FALSE	High	Master Protein	P13639	Elongation factor 2 OS=Homo sapiens OX=9606 GN=EEF2 PE=1 SV=4	0.002	1.132	1	1	1	1	1	858	95.3	6.83	0	1
FALSE	High	Master Protein	P78347	General transcription factor II-I OS=Homo sapiens OX=9606 GN=GTF2I PE=1 SV=2	0.002	1.129	2	1	1	1	1	998	112.3	6.39	0	1
FALSE	High	Master Protein	Q86UW9	Probable E3 ubiquitin-protein ligase DTX2 OS=Homo sapiens OX=9606 GN=DTX2 PE=1 SV=3	0.002	1.128	2	1	1	1	1	622	67.2	8.47	0	1
FALSE	High	Master Protein	P05114	Non-histone chromosomal protein HMG-14 OS=Homo sapiens OX=9606 GN=HMGN1 PE=1 SV=3	0.002	1.116	13	1	1	1	1	100	10.7	9.6	2.41	1
FALSE	High	Master Protein	P18615	Negative elongation factor E OS=Homo sapiens OX=9606 GN=NELFE PE=1 SV=3	0.002	1.116	3	1	1	1	1	380	43.2	9.33	0	1
FALSE	High	Master Protein	Q9NSB4	Keratin, type II cuticular Hb2 OS=Homo sapiens OX=9606 GN=KRT82 PE=3 SV=3	0.002	1.106	2	1	1	1	1	513	56.6	6.74	0	1
FALSE	High	Master Protein	P61353	60S ribosomal protein L27 OS=Homo sapiens OX=9606 GN=RPL27 PE=1 SV=2	0.003	1.076	6	1	1	1	1	136	15.8	10.56	0	1
FALSE	High	Master Protein	Q96CT7	Coiled-coil domain-containing protein 124 OS=Homo sapiens OX=9606 GN=CCDC124 PE=1 SV=1	0.003	1.075	4	1	1	1	1	223	25.8	9.54	1.75	1
FALSE	High	Master Protein	Q92626	Peroxidasin homolog OS=Homo sapiens OX=9606 GN=PXDN PE=1 SV=2	0.003	1.072	1	1	1	1	1	1479	165.2	7.17	0	1
FALSE	High	Master Protein	Q04446	1,4-alpha-glucan-branching enzyme OS=Homo sapiens OX=9606 GN=GBE1 PE=1 SV=3	0.003	1.069	2	1	1	1	1	702	80.4	6.32	0	1
FALSE	High	Master Protein	P07339	Cathepsin D OS=Homo sapiens OX=9606 GN=CTSD PE=1 SV=1	0.004	1.051	2	1	1	1	1	412	44.5	6.54	0	1
FALSE	High	Master Protein	P82912	28S ribosomal protein S11, mitochondrial OS=Homo sapiens OX=9606 GN=MRPS11 PE=1 SV=2	0.006	1.033	6	1	1	1	1	194	20.6	10.81	0	1
FALSE	High	Master Protein	P05783	Keratin, type I cytoskeletal 18 OS=Homo sapiens OX=9606 GN=KRT18 PE=1 SV=2	0.006	1.026	3	1	1	1	1	430	48	5.45	2.19	1
FALSE	High	Master Protein	P36578	60S ribosomal protein L4 OS=Homo sapiens OX=9606 GN=RPL4 PE=1 SV=5	0.007	1.019	3	1	1	1	1	427	47.7	11.06	2.06	1
FALSE	High	Master Protein	P21333	Filamin-A OS=Homo sapiens OX=9606 GN=FLNA PE=1 SV=4	0.008	1.009	1	1	1	1	1	2647	280.6	6.06	2.46	1
FALSE	High	Master Protein	Q01813	ATP-dependent 6-phosphofructokinase, platelet type OS=Homo sapiens OX=9606 GN=PFKP PE=1 SV=2	0.008	1.004	2	1	1	1	1	784	85.5	7.55	1.78	1
FALSE	High	Master Protein	Q04837	Single-stranded DNA-binding protein, mitochondrial OS=Homo sapiens OX=9606 GN=SSBP1 PE=1 SV=1	0.008	1.001	12	1	1	1	1	148	17.2	9.6	2.25	1
FALSE	High	Master Protein	Q6ZNB7	Alkylglycerol monooxygenase OS=Homo sapiens OX=9606 GN=AGMO PE=1 SV=1	0.008	0.987	4	1	1	1	1	445	51.5	7.91	2.28	1
FALSE	High	Master Protein	P62888	60S ribosomal protein L30 OS=Homo sapiens OX=9606 GN=RPL30 PE=1 SV=2	0.008	0.971	10	1	1	1	1	115	12.8	9.63	2.07	1
FALSE	High	Master Protein	P62258	14-3-3 protein epsilon OS=Homo sapiens OX=9606 GN=YWHAE PE=1 SV=1	0.009	0.962	3	1	1	1	1	255	29.2	4.74	0	1
FALSE	High	Master Protein	C9JJN9	Vacuolar protein sorting-associated protein 8 homolog OS=Homo sapiens OX=9606 GN=VPS8 PE=1 SV=1	0.009	0.962	1	1	1	1	1	1428	161.7	5.67	2.37	1
FALSE	Medium	Master Protein	P49207	60S ribosomal protein L34 OS=Homo sapiens OX=9606 GN=RPL34 PE=1 SV=3	0.011	0.953	9	1	1	1	1	117	13.3	11.47	0	1
