# Supplementary material for: Probing the Immunoreceptor Tyrosine-Based Inhibition Motif Interaction Protein Partners with Proteomics
Source: Molecules. 2024 Apr 25;29(9):1977. doi: 10.3390/molecules29091977 (PMC11085718; doi:10.3390/molecules29091977)
Supplement: Supplementary file 1 [file molecules-29-01977-s001.zip › Table S6-PD1-C-ITSM.xlsx]

## Sheet: Proteins
Checked	Protein FDR Confidence: Combined	Master	Accession	Description	Exp. q-value: Combined	Sum PEP Score	Coverage [%]	# Peptides	# PSMs	# Unique Peptides	# Protein Groups	# AAs	MW [kDa]	calc. pI	Score Sequest HT: Sequest HT	# Peptides (by Search Engine): Sequest HT
FALSE	High	Master Protein	P04264	Keratin, type II cytoskeletal 1 OS=Homo sapiens OX=9606 GN=KRT1 PE=1 SV=6	0	102.112	51	33	151	27	1	644	66	8.12	304.99	33
FALSE	High	Master Protein	P13645	Keratin, type I cytoskeletal 10 OS=Homo sapiens OX=9606 GN=KRT10 PE=1 SV=6	0	71.343	41	21	85	14	1	584	58.8	5.21	150.61	21
FALSE	High	Master Protein	P35908	Keratin, type II cytoskeletal 2 epidermal OS=Homo sapiens OX=9606 GN=KRT2 PE=1 SV=2	0	70.785	56	28	44	16	1	639	65.4	8	80.29	28
FALSE	High	Master Protein	H3BPE7	RNA-binding protein FUS OS=Homo sapiens OX=9606 GN=FUS PE=1 SV=1	0	63.17	22	15	92	14	1	527	53.5	9.36	211.23	15
FALSE	High	Master Protein	Q00839	Heterogeneous nuclear ribonucleoprotein U OS=Homo sapiens OX=9606 GN=HNRNPU PE=1 SV=6	0	54.039	24	21	29	21	1	825	90.5	6	58.23	21
FALSE	High	Master Protein	P35527	Keratin, type I cytoskeletal 9 OS=Homo sapiens OX=9606 GN=KRT9 PE=1 SV=3	0	53.312	50	19	58	18	1	623	62	5.24	106.5	19
FALSE	High	Master Protein	P78386	Keratin, type II cuticular Hb5 OS=Homo sapiens OX=9606 GN=KRT85 PE=1 SV=1	0	48.791	30	22	72	5	1	507	55.8	6.55	77.62	22
FALSE	High	Master Protein	O43790	Keratin, type II cuticular Hb6 OS=Homo sapiens OX=9606 GN=KRT86 PE=1 SV=1	0	43.477	28	19	81	4	1	486	53.5	5.66	79.67	19
FALSE	High	Master Protein	P13647	Keratin, type II cytoskeletal 5 OS=Homo sapiens OX=9606 GN=KRT5 PE=1 SV=3	0	37.564	33	20	35	11	1	590	62.3	7.74	49.62	20
FALSE	High	Master Protein	P22626	Heterogeneous nuclear ribonucleoproteins A2/B1 OS=Homo sapiens OX=9606 GN=HNRNPA2B1 PE=1 SV=2	0	37.127	46	14	23	12	1	353	37.4	8.95	28.95	14
FALSE	High	Master Protein	Q06830	Peroxiredoxin-1 OS=Homo sapiens OX=9606 GN=PRDX1 PE=1 SV=1	0	37.117	62	14	21	13	1	199	22.1	8.13	26.45	14
FALSE	High	Master Protein	Q86YZ3	Hornerin OS=Homo sapiens OX=9606 GN=HRNR PE=1 SV=2	0	36.689	13	10	18	10	1	2850	282.2	10.04	40.18	10
FALSE	High	Master Protein	P02538	Keratin, type II cytoskeletal 6A OS=Homo sapiens OX=9606 GN=KRT6A PE=1 SV=3	0	34.014	28	18	33	1	1	564	60	8	53.3	18
FALSE	High	Master Protein	P04259	Keratin, type II cytoskeletal 6B OS=Homo sapiens OX=9606 GN=KRT6B PE=1 SV=5	0	33.633	26	17	34	1	1	564	60	8	54.54	17
FALSE	High	Master Protein	P15924	Desmoplakin OS=Homo sapiens OX=9606 GN=DSP PE=1 SV=3	0	30.355	8	17	18	17	1	2871	331.6	6.81	30.34	17
FALSE	High	Master Protein	J3KTA4	Probable ATP-dependent RNA helicase DDX5 OS=Homo sapiens OX=9606 GN=DDX5 PE=1 SV=1	0	30.151	22	12	19	8	1	614	69	8.85	31.47	12
FALSE	High	Master Protein	Q92499	ATP-dependent RNA helicase DDX1 OS=Homo sapiens OX=9606 GN=DDX1 PE=1 SV=2	0	27.779	18	13	17	13	1	740	82.4	7.23	28.18	13
FALSE	High	Master Protein	P08779	Keratin, type I cytoskeletal 16 OS=Homo sapiens OX=9606 GN=KRT16 PE=1 SV=4	0	25.901	25	11	37	3	1	473	51.2	5.05	55.29	11
FALSE	High	Master Protein	Q14525	Keratin, type I cuticular Ha3-II OS=Homo sapiens OX=9606 GN=KRT33B PE=1 SV=3	0	24.68	27	14	50	2	1	404	46.2	4.84	78.1	14
FALSE	High	Master Protein	P31040	Succinate dehydrogenase [ubiquinone] flavoprotein subunit, mitochondrial OS=Homo sapiens OX=9606 GN=SDHA PE=1 SV=2	0	24.033	18	10	13	10	1	664	72.6	7.39	26.53	10
FALSE	High	Master Protein	P02533	Keratin, type I cytoskeletal 14 OS=Homo sapiens OX=9606 GN=KRT14 PE=1 SV=4	0	23.746	28	12	37	3	1	472	51.5	5.16	54.17	12
FALSE	High	Master Protein	A0A0D9SF53	ATP-dependent RNA helicase DDX3X OS=Homo sapiens OX=9606 GN=DDX3X PE=1 SV=1	0	23.713	19	11	13	10	1	733	81.4	8.07	23.58	11
FALSE	High	Master Protein	P14923	Junction plakoglobin OS=Homo sapiens OX=9606 GN=JUP PE=1 SV=3	0	23.446	18	11	12	11	1	745	81.7	6.14	23.52	11
FALSE	High	Master Protein	O76009	Keratin, type I cuticular Ha3-I OS=Homo sapiens OX=9606 GN=KRT33A PE=2 SV=2	0	23.092	29	15	41	1	1	404	45.9	4.82	71	15
FALSE	High	Master Protein	Q92764	Keratin, type I cuticular Ha5 OS=Homo sapiens OX=9606 GN=KRT35 PE=2 SV=5	0	21.908	19	11	47	2	1	455	50.3	4.91	73.62	11
FALSE	High	Master Protein	Q52LJ0	Protein FAM98B OS=Homo sapiens OX=9606 GN=FAM98B PE=1 SV=1	0	20.827	18	5	9	5	1	330	37.2	6.29	20.98	5
FALSE	High	Master Protein	P06733	Alpha-enolase OS=Homo sapiens OX=9606 GN=ENO1 PE=1 SV=2	0	20.691	33	9	13	9	1	434	47.1	7.39	22.76	9
FALSE	High	Master Protein	Q9Y3I0	tRNA-splicing ligase RtcB homolog OS=Homo sapiens OX=9606 GN=RTCB PE=1 SV=1	0	19.72	15	6	9	6	1	505	55.2	7.23	16.32	6
FALSE	High	Master Protein	O76013	Keratin, type I cuticular Ha6 OS=Homo sapiens OX=9606 GN=KRT36 PE=2 SV=1	0	18.883	14	8	35	4	1	467	52.2	4.94	51.71	8
FALSE	High	Master Protein	O95678	Keratin, type II cytoskeletal 75 OS=Homo sapiens OX=9606 GN=KRT75 PE=1 SV=2	0	17.997	12	9	19	2	1	551	59.5	7.74	34.53	9
FALSE	High	Master Protein	Q9NSB4	Keratin, type II cuticular Hb2 OS=Homo sapiens OX=9606 GN=KRT82 PE=3 SV=3	0	17.375	10	7	31	3	1	513	56.6	6.74	34.19	7
FALSE	High	Master Protein	Q01546	Keratin, type II cytoskeletal 2 oral OS=Homo sapiens OX=9606 GN=KRT76 PE=1 SV=2	0	17.099	12	11	17	1	1	638	65.8	8.12	24.41	11
FALSE	High	Master Protein	P68104	Elongation factor 1-alpha 1 OS=Homo sapiens OX=9606 GN=EEF1A1 PE=1 SV=1	0	16.992	16	5	7	5	1	462	50.1	9.01	12.96	5
FALSE	High	Master Protein	P09651	Heterogeneous nuclear ribonucleoprotein A1 OS=Homo sapiens OX=9606 GN=HNRNPA1 PE=1 SV=5	0	16.875	23	6	8	4	1	372	38.7	9.13	11.68	6
FALSE	High	Master Protein	P12035	Keratin, type II cytoskeletal 3 OS=Homo sapiens OX=9606 GN=KRT3 PE=1 SV=3	0	16.804	11	10	17	1	1	628	64.4	6.48	24.21	10
FALSE	High	Master Protein	A0A1W2PQ51	Probable ATP-dependent RNA helicase DDX17 OS=Homo sapiens OX=9606 GN=DDX17 PE=1 SV=1	0	16.526	8	7	12	3	1	731	80.4	8.37	24.3	7
FALSE	High	Master Protein	Q14103	Heterogeneous nuclear ribonucleoprotein D0 OS=Homo sapiens OX=9606 GN=HNRNPD PE=1 SV=1	0	16.493	19	8	12	7	1	355	38.4	7.81	24.31	8
FALSE	High	Master Protein	Q04695	Keratin, type I cytoskeletal 17 OS=Homo sapiens OX=9606 GN=KRT17 PE=1 SV=2	0	15.728	19	9	28	3	1	432	48.1	5.02	35.09	9
FALSE	High	Master Protein	P62701	40S ribosomal protein S4, X isoform OS=Homo sapiens OX=9606 GN=RPS4X PE=1 SV=2	0	14.418	24	6	7	6	1	263	29.6	10.15	16.3	6
FALSE	High	Master Protein	G8JLB6	Heterogeneous nuclear ribonucleoprotein H OS=Homo sapiens OX=9606 GN=HNRNPH1 PE=1 SV=1	0	14.359	17	5	7	5	1	472	51.2	6.8	10.25	5
FALSE	High	Master Protein	Q9Y224	RNA transcription, translation and transport factor protein OS=Homo sapiens OX=9606 GN=RTRAF PE=1 SV=1	0	14.253	23	5	8	5	1	244	28.1	6.65	18.7	5
FALSE	High	Master Protein	Q15437	Protein transport protein Sec23B OS=Homo sapiens OX=9606 GN=SEC23B PE=1 SV=2	0	14.151	14	6	8	5	1	767	86.4	6.89	16.16	6
FALSE	High	Master Protein	P13646	Keratin, type I cytoskeletal 13 OS=Homo sapiens OX=9606 GN=KRT13 PE=1 SV=4	0	13.945	14	9	25	2	1	458	49.6	4.96	23.52	9
FALSE	High	Master Protein	P68371	Tubulin beta-4B chain OS=Homo sapiens OX=9606 GN=TUBB4B PE=1 SV=1	0	13.856	21	8	9	8	1	445	49.8	4.89	15.09	8
FALSE	High	Master Protein	P02768	Serum albumin OS=Homo sapiens OX=9606 GN=ALB PE=1 SV=2	0	13.392	10	7	12	7	1	609	69.3	6.28	12.04	7
FALSE	High	Master Protein	Q9HA64	Ketosamine-3-kinase OS=Homo sapiens OX=9606 GN=FN3KRP PE=1 SV=2	0	13.295	19	6	7	6	1	309	34.4	7.33	14.64	6
FALSE	High	Master Protein	P08729	Keratin, type II cytoskeletal 7 OS=Homo sapiens OX=9606 GN=KRT7 PE=1 SV=5	0	13.231	11	6	24	2	1	469	51.4	5.48	42.77	6
FALSE	High	Master Protein	P31942	Heterogeneous nuclear ribonucleoprotein H3 OS=Homo sapiens OX=9606 GN=HNRNPH3 PE=1 SV=2	0	12.679	20	4	6	4	1	346	36.9	6.87	14.41	4
FALSE	High	Master Protein	A0A087WTP3	Far upstream element-binding protein 2 OS=Homo sapiens OX=9606 GN=KHSRP PE=1 SV=1	0	12.648	16	8	8	8	1	711	73	7.71	12.71	8
FALSE	High	Master Protein	P68363	Tubulin alpha-1B chain OS=Homo sapiens OX=9606 GN=TUBA1B PE=1 SV=1	0	12.443	14	5	6	5	1	451	50.1	5.06	9.34	5
FALSE	High	Master Protein	P21291	Cysteine and glycine-rich protein 1 OS=Homo sapiens OX=9606 GN=CSRP1 PE=1 SV=3	0	12.087	34	5	6	5	1	193	20.6	8.57	9.56	5
FALSE	High	Master Protein	P04406	Glyceraldehyde-3-phosphate dehydrogenase OS=Homo sapiens OX=9606 GN=GAPDH PE=1 SV=3	0	11.557	24	5	5	5	1	335	36	8.46	11.18	5
FALSE	High	Master Protein	P31151	Protein S100-A7 OS=Homo sapiens OX=9606 GN=S100A7 PE=1 SV=4	0	11.531	36	3	5	3	1	101	11.5	6.77	7.57	3
FALSE	High	Master Protein	P53992	Protein transport protein Sec24C OS=Homo sapiens OX=9606 GN=SEC24C PE=1 SV=3	0	11.147	8	6	6	6	1	1094	118.2	7.06	9.69	6
FALSE	High	Master Protein	P62937	Peptidyl-prolyl cis-trans isomerase A OS=Homo sapiens OX=9606 GN=PPIA PE=1 SV=2	0	10.943	36	4	9	4	1	165	18	7.81	20.31	4
FALSE	High	Master Protein	Q9UBN7	Histone deacetylase 6 OS=Homo sapiens OX=9606 GN=HDAC6 PE=1 SV=2	0	10.55	5	3	5	3	1	1215	131.3	5.3	12.87	3
FALSE	High	Master Protein	Q7Z794	Keratin, type II cytoskeletal 1b OS=Homo sapiens OX=9606 GN=KRT77 PE=2 SV=3	0	10.338	8	6	12	2	1	578	61.9	5.99	18.16	6
FALSE	High	Master Protein	Q01844	RNA-binding protein EWS OS=Homo sapiens OX=9606 GN=EWSR1 PE=1 SV=1	0	10.327	5	4	7	4	1	656	68.4	9.33	16.25	4
FALSE	High	Master Protein	P62829	60S ribosomal protein L23 OS=Homo sapiens OX=9606 GN=RPL23 PE=1 SV=1	0	9.595	28	3	4	3	1	140	14.9	10.51	12.4	3
FALSE	High	Master Protein	Q99729	Heterogeneous nuclear ribonucleoprotein A/B OS=Homo sapiens OX=9606 GN=HNRNPAB PE=1 SV=2	0	9.564	20	6	9	5	1	332	36.2	8.21	16.73	6
FALSE	High	Master Protein	M0R0R2	40S ribosomal protein S5 OS=Homo sapiens OX=9606 GN=RPS5 PE=1 SV=1	0	8.951	15	3	6	3	1	225	25.3	9.76	10.43	3
FALSE	High	Master Protein	P62280	40S ribosomal protein S11 OS=Homo sapiens OX=9606 GN=RPS11 PE=1 SV=3	0	8.913	36	5	5	5	1	158	18.4	10.3	2.45	5
FALSE	High	Master Protein	P04818	Thymidylate synthase OS=Homo sapiens OX=9606 GN=TYMS PE=1 SV=3	0	8.911	10	2	3	2	1	313	35.7	7.01	8.75	2
FALSE	High	Master Protein	P23396	40S ribosomal protein S3 OS=Homo sapiens OX=9606 GN=RPS3 PE=1 SV=2	0	8.76	22	6	6	6	1	243	26.7	9.66	3.91	6
FALSE	High	Master Protein	P31483	Nucleolysin TIA-1 isoform p40 OS=Homo sapiens OX=9606 GN=TIA1 PE=1 SV=3	0	8.593	9	4	5	1	1	386	42.9	7.74	8.61	4
FALSE	High	Master Protein	Q14532	Keratin, type I cuticular Ha2 OS=Homo sapiens OX=9606 GN=KRT32 PE=2 SV=3	0	8.416	10	5	37	1	1	448	50.3	4.84	55.09	5
FALSE	High	Master Protein	Q01085	Nucleolysin TIAR OS=Homo sapiens OX=9606 GN=TIAL1 PE=1 SV=1	0	8.26	9	4	5	1	1	375	41.6	7.74	8.61	4
FALSE	High	Master Protein	F8W1S1	Keratin, type II cytoskeletal 74 OS=Homo sapiens OX=9606 GN=KRT74 PE=1 SV=1	0	7.9	8	5	8	1	1	543	59.4	7.44	13.32	5
FALSE	High	Master Protein	Q14847	LIM and SH3 domain protein 1 OS=Homo sapiens OX=9606 GN=LASP1 PE=1 SV=2	0	7.841	13	4	5	4	1	261	29.7	7.05	8.9	4
FALSE	High	Master Protein	Q9BUJ2	Heterogeneous nuclear ribonucleoprotein U-like protein 1 OS=Homo sapiens OX=9606 GN=HNRNPUL1 PE=1 SV=2	0	7.576	6	4	4	4	1	856	95.7	6.92	7.11	4
FALSE	High	Master Protein	O43148	mRNA cap guanine-N7 methyltransferase OS=Homo sapiens OX=9606 GN=RNMT PE=1 SV=1	0	7.311	12	4	4	4	1	476	54.8	6.61	6.42	4
FALSE	High	Master Protein	Q9Y383	Putative RNA-binding protein Luc7-like 2 OS=Homo sapiens OX=9606 GN=LUC7L2 PE=1 SV=2	0	7.286	7	2	3	2	1	392	46.5	10.01	4.45	2
FALSE	High	Master Protein	Q5D862	Filaggrin-2 OS=Homo sapiens OX=9606 GN=FLG2 PE=1 SV=1	0	7.024	3	4	4	4	1	2391	247.9	8.31	7.19	4
FALSE	High	Master Protein	P62269	40S ribosomal protein S18 OS=Homo sapiens OX=9606 GN=RPS18 PE=1 SV=3	0	6.959	26	4	4	2	1	152	17.7	10.99	4	4
FALSE	High	Master Protein	P60709	Actin, cytoplasmic 1 OS=Homo sapiens OX=9606 GN=ACTB PE=1 SV=1	0	6.913	8	2	4	1	1	375	41.7	5.48	3.12	2
FALSE	High	Master Protein	Q15436	Protein transport protein Sec23A OS=Homo sapiens OX=9606 GN=SEC23A PE=1 SV=2	0	6.882	5	3	4	2	1	765	86.1	7.08	6.09	3
FALSE	High	Master Protein	P51991	Heterogeneous nuclear ribonucleoprotein A3 OS=Homo sapiens OX=9606 GN=HNRNPA3 PE=1 SV=2	0	6.761	12	3	3	3	1	378	39.6	9.01	6.63	3
FALSE	High	Master Protein	P11142	Heat shock cognate 71 kDa protein OS=Homo sapiens OX=9606 GN=HSPA8 PE=1 SV=1	0	6.721	6	4	4	2	1	646	70.9	5.52	6.3	4
FALSE	High	Master Protein	Q86X55	Histone-arginine methyltransferase CARM1 OS=Homo sapiens OX=9606 GN=CARM1 PE=1 SV=3	0	6.719	10	4	4	4	1	608	65.8	6.73	5.45	4
FALSE	High	Master Protein	P32119	Peroxiredoxin-2 OS=Homo sapiens OX=9606 GN=PRDX2 PE=1 SV=5	0	6.65	24	4	4	3	1	198	21.9	5.97	5.93	4
FALSE	High	Master Protein	Q8N1N4	Keratin, type II cytoskeletal 78 OS=Homo sapiens OX=9606 GN=KRT78 PE=1 SV=2	0	6.634	9	4	4	4	1	520	56.8	6.02	6.12	4
FALSE	High	Master Protein	P62736	Actin, aortic smooth muscle OS=Homo sapiens OX=9606 GN=ACTA2 PE=1 SV=1	0	6.389	10	3	5	2	1	377	42	5.39	6.65	3
FALSE	High	Master Protein	P62805	Histone H4 OS=Homo sapiens OX=9606 GN=HIST1H4A PE=1 SV=2	0	6.237	29	3	4	3	1	103	11.4	11.36	5.43	3
FALSE	High	Master Protein	Q92804	TATA-binding protein-associated factor 2N OS=Homo sapiens OX=9606 GN=TAF15 PE=1 SV=1	0	6.23	3	2	12	1	1	592	61.8	8.02	23.09	2
FALSE	High	Master Protein	A0A0U1RRH7	Histone H2A OS=Homo sapiens OX=9606 PE=3 SV=1	0	6.203	16	2	4	2	1	170	18.5	11.52	8.69	2
FALSE	High	Master Protein	A0A0G2JQH2	40S ribosomal protein S18 OS=Homo sapiens OX=9606 GN=RPS18 PE=1 SV=1	0	6.182	97	3	4	1	1	33	3.8	11	4.62	3
FALSE	High	Master Protein	Q6UWP8	Suprabasin OS=Homo sapiens OX=9606 GN=SBSN PE=1 SV=2	0	6.169	15	2	2	2	1	590	60.5	7.01	5	2
FALSE	High	Master Protein	E7EQ64	Trypsin-1 OS=Homo sapiens OX=9606 GN=PRSS1 PE=1 SV=1	0	6.162	7	2	22	2	1	261	28.1	7.25	39.74	2
FALSE	High	Master Protein	P69905	Hemoglobin subunit alpha OS=Homo sapiens OX=9606 GN=HBA1 PE=1 SV=2	0	6.057	19	2	8	2	1	142	15.2	8.68	16.62	2
FALSE	High	Master Protein	O75340	Programmed cell death protein 6 OS=Homo sapiens OX=9606 GN=PDCD6 PE=1 SV=1	0	6.044	18	3	3	3	1	191	21.9	5.4	3.54	3
FALSE	High	Master Protein	Q96I24	Far upstream element-binding protein 3 OS=Homo sapiens OX=9606 GN=FUBP3 PE=1 SV=2	0	5.955	8	4	4	4	1	572	61.6	8.38	5.56	4
FALSE	High	Master Protein	Q13151	Heterogeneous nuclear ribonucleoprotein A0 OS=Homo sapiens OX=9606 GN=HNRNPA0 PE=1 SV=1	0	5.661	13	3	4	3	1	305	30.8	9.29	7.56	3
FALSE	High	Master Protein	P60866	40S ribosomal protein S20 OS=Homo sapiens OX=9606 GN=RPS20 PE=1 SV=1	0	5.476	23	2	3	2	1	119	13.4	9.94	4.88	2
FALSE	High	Master Protein	P16455	Methylated-DNA--protein-cysteine methyltransferase OS=Homo sapiens OX=9606 GN=MGMT PE=1 SV=1	0	5.444	17	2	3	2	1	207	21.6	8.1	7.52	2
FALSE	High	Master Protein	P62424	60S ribosomal protein L7a OS=Homo sapiens OX=9606 GN=RPL7A PE=1 SV=2	0	5.408	12	3	3	3	1	266	30	10.61	3.75	3
FALSE	High	Master Protein	P02545	Prelamin-A/C OS=Homo sapiens OX=9606 GN=LMNA PE=1 SV=1	0	5.393	6	3	3	3	1	664	74.1	7.02	5.69	3
FALSE	High	Master Protein	Q6KB66	Keratin, type II cytoskeletal 80 OS=Homo sapiens OX=9606 GN=KRT80 PE=1 SV=2	0	5.382	5	2	17	1	1	452	50.5	5.67	29.48	2
FALSE	High	Master Protein	P10809	60 kDa heat shock protein, mitochondrial OS=Homo sapiens OX=9606 GN=HSPD1 PE=1 SV=2	0	5.373	8	4	4	4	1	573	61	5.87	7.91	4
FALSE	High	Master Protein	P15880	40S ribosomal protein S2 OS=Homo sapiens OX=9606 GN=RPS2 PE=1 SV=2	0	5.363	14	4	4	4	1	293	31.3	10.24	3.33	4
FALSE	High	Master Protein	Q13751	Laminin subunit beta-3 OS=Homo sapiens OX=9606 GN=LAMB3 PE=1 SV=1	0	5.267	4	3	4	3	1	1172	129.5	7.21	7.35	3
FALSE	High	Master Protein	P05109	Protein S100-A8 OS=Homo sapiens OX=9606 GN=S100A8 PE=1 SV=1	0	5.159	20	2	3	2	1	93	10.8	7.03	4.25	2
FALSE	High	Master Protein	P16402	Histone H1.3 OS=Homo sapiens OX=9606 GN=HIST1H1D PE=1 SV=2	0	5.078	17	4	4	4	1	221	22.3	11.02	4.63	4
FALSE	High	Master Protein	P31327	Carbamoyl-phosphate synthase [ammonia], mitochondrial OS=Homo sapiens OX=9606 GN=CPS1 PE=1 SV=2	0	5.018	4	4	4	4	1	1500	164.8	6.74	7.71	4
FALSE	High	Master Protein	Q15366	Poly(rC)-binding protein 2 OS=Homo sapiens OX=9606 GN=PCBP2 PE=1 SV=1	0	4.839	11	3	3	2	1	365	38.6	6.79	4.38	3
FALSE	High	Master Protein	Q8IXB1	DnaJ homolog subfamily C member 10 OS=Homo sapiens OX=9606 GN=DNAJC10 PE=1 SV=2	0	4.837	5	3	3	3	1	793	91	7.18	4.59	3
FALSE	High	Master Protein	Q01469	Fatty acid-binding protein 5 OS=Homo sapiens OX=9606 GN=FABP5 PE=1 SV=3	0	4.789	17	2	2	2	1	135	15.2	7.01	1.96	2
FALSE	High	Master Protein	E9PK54	Heat shock cognate 71 kDa protein (Fragment) OS=Homo sapiens OX=9606 GN=HSPA8 PE=1 SV=8	0	4.775	19	3	3	1	1	183	19.9	7.33	5.43	3
FALSE	High	Master Protein	Q9H0D6	5'-3' exoribonuclease 2 OS=Homo sapiens OX=9606 GN=XRN2 PE=1 SV=1	0	4.627	3	2	2	2	1	950	108.5	7.47	2.16	2
FALSE	High	Master Protein	E7EMK3	Flotillin-2 OS=Homo sapiens OX=9606 GN=FLOT2 PE=1 SV=1	0	4.514	5	2	2	2	1	483	53.1	5.24	2.05	2
FALSE	High	Master Protein	A6NMY6	Putative annexin A2-like protein OS=Homo sapiens OX=9606 GN=ANXA2P2 PE=5 SV=2	0	4.5	10	2	3	2	1	339	38.6	6.95	7.65	2
FALSE	High	Master Protein	Q9C037	E3 ubiquitin-protein ligase TRIM4 OS=Homo sapiens OX=9606 GN=TRIM4 PE=1 SV=2	0	4.48	4	2	2	2	1	500	57.4	8.1	1.86	2
FALSE	High	Master Protein	P05141	ADP/ATP translocase 2 OS=Homo sapiens OX=9606 GN=SLC25A5 PE=1 SV=7	0	4.447	8	2	2	1	1	298	32.8	9.69	1.69	2
FALSE	High	Master Protein	P34897	Serine hydroxymethyltransferase, mitochondrial OS=Homo sapiens OX=9606 GN=SHMT2 PE=1 SV=3	0	4.434	5	2	2	2	1	504	56	8.53	3.71	2
FALSE	High	Master Protein	P52294	Importin subunit alpha-5 OS=Homo sapiens OX=9606 GN=KPNA1 PE=1 SV=3	0	4.397	5	2	2	2	1	538	60.2	5.01	4.04	2
FALSE	High	Master Protein	A0A2R8Y5Y7	60S ribosomal protein L9 OS=Homo sapiens OX=9606 GN=RPL9 PE=1 SV=1	0	4.39	10	2	3	2	1	220	25	9.74	6.48	2
FALSE	High	Master Protein	A0A024R4M0	40S ribosomal protein S9 OS=Homo sapiens OX=9606 GN=RPS9 PE=1 SV=1	0	4.366	15	3	3	3	1	194	22.6	10.65	0	3
FALSE	High	Master Protein	P12236	ADP/ATP translocase 3 OS=Homo sapiens OX=9606 GN=SLC25A6 PE=1 SV=4	0	4.243	8	2	2	1	1	298	32.8	9.74	3.64	2
FALSE	High	Master Protein	P04792	Heat shock protein beta-1 OS=Homo sapiens OX=9606 GN=HSPB1 PE=1 SV=2	0	4.166	25	3	3	3	1	205	22.8	6.4	6.25	3
FALSE	High	Master Protein	P62753	40S ribosomal protein S6 OS=Homo sapiens OX=9606 GN=RPS6 PE=1 SV=1	0	4.148	7	1	1	1	1	249	28.7	10.84	3	1
FALSE	High	Master Protein	P06702	Protein S100-A9 OS=Homo sapiens OX=9606 GN=S100A9 PE=1 SV=1	0	4.004	13	1	2	1	1	114	13.2	6.13	5.41	1
FALSE	High	Master Protein	Q9UBV8	Peflin OS=Homo sapiens OX=9606 GN=PEF1 PE=1 SV=1	0	3.995	9	2	2	2	1	284	30.4	6.54	3.12	2
FALSE	High	Master Protein	Q02878	60S ribosomal protein L6 OS=Homo sapiens OX=9606 GN=RPL6 PE=1 SV=3	0	3.968	8	2	2	2	1	288	32.7	10.58	2.14	2
FALSE	High	Master Protein	Q14134	Tripartite motif-containing protein 29 OS=Homo sapiens OX=9606 GN=TRIM29 PE=1 SV=2	0	3.957	6	3	3	3	1	588	65.8	7.15	4.81	3
FALSE	High	Master Protein	P31944	Caspase-14 OS=Homo sapiens OX=9606 GN=CASP14 PE=1 SV=2	0	3.954	10	2	2	2	1	242	27.7	5.58	3.33	2
FALSE	High	Master Protein	P46776	60S ribosomal protein L27a OS=Homo sapiens OX=9606 GN=RPL27A PE=1 SV=2	0	3.829	16	2	2	2	1	148	16.6	11	4.73	2
FALSE	High	Master Protein	Q14240	Eukaryotic initiation factor 4A-II OS=Homo sapiens OX=9606 GN=EIF4A2 PE=1 SV=2	0	3.792	6	2	2	2	1	407	46.4	5.48	1.64	2
FALSE	High	Master Protein	P11940	Polyadenylate-binding protein 1 OS=Homo sapiens OX=9606 GN=PABPC1 PE=1 SV=2	0	3.758	3	2	3	2	1	636	70.6	9.5	0	2
FALSE	High	Master Protein	Q1KMD3	Heterogeneous nuclear ribonucleoprotein U-like protein 2 OS=Homo sapiens OX=9606 GN=HNRNPUL2 PE=1 SV=1	0	3.723	3	2	2	2	1	747	85.1	4.91	2.2	2
FALSE	High	Master Protein	Q9UPN9	E3 ubiquitin-protein ligase TRIM33 OS=Homo sapiens OX=9606 GN=TRIM33 PE=1 SV=3	0	3.644	2	2	2	2	1	1127	122.5	6.67	4.01	2
FALSE	High	Master Protein	P36578	60S ribosomal protein L4 OS=Homo sapiens OX=9606 GN=RPL4 PE=1 SV=5	0	3.591	5	2	2	2	1	427	47.7	11.06	2.43	2
FALSE	High	Master Protein	D6REE5	Receptor of-activated protein C kinase 1 (Fragment) OS=Homo sapiens OX=9606 GN=RACK1 PE=1 SV=1	0	3.555	9	2	2	2	1	321	34.9	6.83	2.78	2
FALSE	High	Master Protein	P62277	40S ribosomal protein S13 OS=Homo sapiens OX=9606 GN=RPS13 PE=1 SV=2	0	3.536	9	2	2	2	1	151	17.2	10.54	2.28	2
FALSE	High	Master Protein	P07900	Heat shock protein HSP 90-alpha OS=Homo sapiens OX=9606 GN=HSP90AA1 PE=1 SV=5	0	3.494	3	2	2	2	1	732	84.6	5.02	1.81	2
FALSE	High	Master Protein	P20618	Proteasome subunit beta type-1 OS=Homo sapiens OX=9606 GN=PSMB1 PE=1 SV=2	0	3.466	7	2	2	2	1	241	26.5	8.13	2.11	2
FALSE	High	Master Protein	P57721	Poly(rC)-binding protein 3 OS=Homo sapiens OX=9606 GN=PCBP3 PE=2 SV=2	0	3.387	6	2	2	1	1	371	39.4	8.07	2.29	2
FALSE	High	Master Protein	P26373	60S ribosomal protein L13 OS=Homo sapiens OX=9606 GN=RPL13 PE=1 SV=4	0	3.384	11	2	2	2	1	211	24.2	11.65	1.88	2
FALSE	High	Master Protein	P60174	Triosephosphate isomerase OS=Homo sapiens OX=9606 GN=TPI1 PE=1 SV=3	0	3.236	9	2	2	2	1	286	30.8	5.92	2.23	2
FALSE	High	Master Protein	P17812	CTP synthase 1 OS=Homo sapiens OX=9606 GN=CTPS1 PE=1 SV=2	0	3.213	4	2	2	2	1	591	66.6	6.46	3.89	2
FALSE	High	Master Protein	P22531	Small proline-rich protein 2E OS=Homo sapiens OX=9606 GN=SPRR2E PE=2 SV=2	0	3.204	25	2	2	2	1	72	7.9	8.31	2.28	2
FALSE	High	Master Protein	Q8WUM4	Programmed cell death 6-interacting protein OS=Homo sapiens OX=9606 GN=PDCD6IP PE=1 SV=1	0	3.124	4	2	2	2	1	868	96	6.52	5.04	2
FALSE	High	Master Protein	P63173	60S ribosomal protein L38 OS=Homo sapiens OX=9606 GN=RPL38 PE=1 SV=2	0	3.004	19	1	1	1	1	70	8.2	10.1	3.01	1
FALSE	High	Master Protein	Q02413	Desmoglein-1 OS=Homo sapiens OX=9606 GN=DSG1 PE=1 SV=2	0	2.973	4	2	2	2	1	1049	113.7	5.03	5.53	2
FALSE	High	Master Protein	Q6UXI9	Nephronectin OS=Homo sapiens OX=9606 GN=NPNT PE=2 SV=3	0	2.921	2	1	1	1	1	565	61.9	8.34	2.77	1
FALSE	High	Master Protein	P62081	40S ribosomal protein S7 OS=Homo sapiens OX=9606 GN=RPS7 PE=1 SV=1	0	2.863	7	2	2	2	1	194	22.1	10.1	5.85	2
FALSE	High	Master Protein	Q9BRJ7	Tudor-interacting repair regulator protein OS=Homo sapiens OX=9606 GN=NUDT16L1 PE=1 SV=1	0	2.859	10	2	2	2	1	211	23.3	8.91	1.71	2
FALSE	High	Master Protein	P26641	Elongation factor 1-gamma OS=Homo sapiens OX=9606 GN=EEF1G PE=1 SV=3	0	2.834	5	2	2	2	1	437	50.1	6.67	3.77	2
FALSE	High	Master Protein	P38646	Stress-70 protein, mitochondrial OS=Homo sapiens OX=9606 GN=HSPA9 PE=1 SV=2	0	2.791	2	1	1	1	1	679	73.6	6.16	1.62	1
FALSE	High	Master Protein	P33993	DNA replication licensing factor MCM7 OS=Homo sapiens OX=9606 GN=MCM7 PE=1 SV=4	0	2.759	3	1	1	1	1	719	81.3	6.46	3.9	1
FALSE	High	Master Protein	O00267	Transcription elongation factor SPT5 OS=Homo sapiens OX=9606 GN=SUPT5H PE=1 SV=1	0	2.736	1	1	2	1	1	1087	120.9	5.06	3.24	1
FALSE	High	Master Protein	P28482	Mitogen-activated protein kinase 1 OS=Homo sapiens OX=9606 GN=MAPK1 PE=1 SV=3	0	2.717	5	2	2	2	1	360	41.4	6.98	1.7	2
FALSE	High	Master Protein	A0A0C4DG17	40S ribosomal protein SA OS=Homo sapiens OX=9606 GN=RPSA PE=1 SV=1	0	2.684	4	1	1	1	1	300	33.3	4.87	0	1
FALSE	High	Master Protein	H3BNC9	Uncharacterized protein OS=Homo sapiens OX=9606 PE=3 SV=2	0	2.667	2	1	2	1	1	584	64.5	8.78	2.17	1
FALSE	High	Master Protein	P62244	40S ribosomal protein S15a OS=Homo sapiens OX=9606 GN=RPS15A PE=1 SV=2	0	2.617	14	2	2	2	1	130	14.8	10.13	3.44	2
FALSE	High	Master Protein	I3L504	Eukaryotic translation initiation factor 5A-1 OS=Homo sapiens OX=9606 GN=EIF5A PE=1 SV=1	0	2.609	6	1	1	1	1	186	20.5	5.25	1.89	1
FALSE	High	Master Protein	P11802	Cyclin-dependent kinase 4 OS=Homo sapiens OX=9606 GN=CDK4 PE=1 SV=2	0	2.577	7	2	2	2	1	303	33.7	7.01	1.83	2
FALSE	High	Master Protein	P06576	ATP synthase subunit beta, mitochondrial OS=Homo sapiens OX=9606 GN=ATP5F1B PE=1 SV=3	0	2.574	3	1	1	1	1	529	56.5	5.4	2.44	1
FALSE	High	Master Protein	A0A0G2JIW1	Heat shock 70 kDa protein 1B OS=Homo sapiens OX=9606 GN=HSPA1B PE=1 SV=1	0	2.568	5	2	2	2	1	642	70.1	5.66	2.6	2
FALSE	High	Master Protein	P18124	60S ribosomal protein L7 OS=Homo sapiens OX=9606 GN=RPL7 PE=1 SV=1	0	2.538	4	1	1	1	1	248	29.2	10.65	1.85	1
FALSE	High	Master Protein	Q15637	Splicing factor 1 OS=Homo sapiens OX=9606 GN=SF1 PE=1 SV=4	0	2.505	4	2	2	2	1	639	68.3	8.98	1.72	2
FALSE	High	Master Protein	P33992	DNA replication licensing factor MCM5 OS=Homo sapiens OX=9606 GN=MCM5 PE=1 SV=5	0	2.489	2	1	1	1	1	734	82.2	8.37	1.98	1
FALSE	High	Master Protein	Q93052	Lipoma-preferred partner OS=Homo sapiens OX=9606 GN=LPP PE=1 SV=1	0	2.474	6	2	2	2	1	612	65.7	7.37	4.55	2
FALSE	High	Master Protein	O43707	Alpha-actinin-4 OS=Homo sapiens OX=9606 GN=ACTN4 PE=1 SV=2	0	2.467	1	1	1	1	1	911	104.8	5.44	2.31	1
FALSE	High	Master Protein	G5E9Q6	Profilin OS=Homo sapiens OX=9606 GN=PFN2 PE=1 SV=1	0	2.451	9	2	2	2	1	188	20.8	7.52	0	2
FALSE	High	Master Protein	J3QLS3	28S ribosomal protein S7, mitochondrial OS=Homo sapiens OX=9606 GN=MRPS7 PE=1 SV=1	0	2.428	4	1	1	1	1	271	31.7	9.86	1.61	1
FALSE	High	Master Protein	P80723	Brain acid soluble protein 1 OS=Homo sapiens OX=9606 GN=BASP1 PE=1 SV=2	0	2.414	12	2	2	2	1	227	22.7	4.63	3.78	2
FALSE	High	Master Protein	P78371	T-complex protein 1 subunit beta OS=Homo sapiens OX=9606 GN=CCT2 PE=1 SV=4	0	2.373	3	1	1	1	1	535	57.5	6.46	2.31	1
FALSE	High	Master Protein	B7Z6Z4	cDNA FLJ56329, highly similar to Myosin light polypeptide 6 OS=Homo sapiens OX=9606 GN=MYL6 PE=1 SV=1	0	2.356	12	2	2	2	1	238	26.7	5.08	3.89	2
FALSE	High	Master Protein	Q15365	Poly(rC)-binding protein 1 OS=Homo sapiens OX=9606 GN=PCBP1 PE=1 SV=2	0	2.262	7	2	2	1	1	356	37.5	7.09	0	2
FALSE	High	Master Protein	P30048	Thioredoxin-dependent peroxide reductase, mitochondrial OS=Homo sapiens OX=9606 GN=PRDX3 PE=1 SV=3	0	2.261	9	2	2	2	1	256	27.7	7.78	1.85	2
FALSE	High	Master Protein	Q8IUC1	Keratin-associated protein 11-1 OS=Homo sapiens OX=9606 GN=KRTAP11-1 PE=2 SV=1	0	2.257	7	1	2	1	1	163	17.1	7.9	3.62	1
FALSE	High	Master Protein	Q15084	Protein disulfide-isomerase A6 OS=Homo sapiens OX=9606 GN=PDIA6 PE=1 SV=1	0	2.241	3	1	1	1	1	440	48.1	5.08	2.79	1
FALSE	High	Master Protein	P62263	40S ribosomal protein S14 OS=Homo sapiens OX=9606 GN=RPS14 PE=1 SV=3	0	2.236	9	2	2	2	1	151	16.3	10.05	5.01	2
FALSE	High	Master Protein	E9PR30	40S ribosomal protein S30 OS=Homo sapiens OX=9606 GN=FAU PE=1 SV=1	0	2.227	10	1	1	1	1	98	10.9	11.56	2.13	1
FALSE	High	Master Protein	Q9NUI1	Peroxisomal 2,4-dienoyl-CoA reductase OS=Homo sapiens OX=9606 GN=DECR2 PE=1 SV=1	0	2.194	4	1	1	1	1	292	30.8	9.22	0	1
FALSE	High	Master Protein	H7C561	Splicing factor 1 (Fragment) OS=Homo sapiens OX=9606 GN=SF1 PE=1 SV=8	0	2.176	8	2	2	2	1	291	30.1	9.1	0	2
FALSE	High	Master Protein	P09669	Cytochrome c oxidase subunit 6C OS=Homo sapiens OX=9606 GN=COX6C PE=1 SV=2	0	2.135	23	2	2	2	1	75	8.8	10.39	0	2
FALSE	High	Master Protein	P11021	Endoplasmic reticulum chaperone BiP OS=Homo sapiens OX=9606 GN=HSPA5 PE=1 SV=2	0	2.132	4	2	2	2	1	654	72.3	5.16	3.87	2
FALSE	High	Master Protein	F5H6S0	Keratin-associated protein 2-2 OS=Homo sapiens OX=9606 GN=KRTAP2-2 PE=4 SV=1	0	2.097	8	1	1	1	1	129	13.5	7.8	2.84	1
FALSE	High	Master Protein	P61626	Lysozyme C OS=Homo sapiens OX=9606 GN=LYZ PE=1 SV=1	0	2.073	9	2	2	2	1	148	16.5	9.16	0	2
FALSE	High	Master Protein	U3KQK0	Histone H2B OS=Homo sapiens OX=9606 GN=HIST1H2BN PE=1 SV=1	0	2.066	5	1	1	1	1	166	18.8	10.54	0	1
FALSE	High	Master Protein	Q9P1Z2	Calcium-binding and coiled-coil domain-containing protein 1 OS=Homo sapiens OX=9606 GN=CALCOCO1 PE=1 SV=2	0	2.062	4	2	2	2	1	691	77.3	4.82	2.06	2
FALSE	High	Master Protein	Q96IJ6	Mannose-1-phosphate guanyltransferase alpha OS=Homo sapiens OX=9606 GN=GMPPA PE=1 SV=1	0	2.015	4	1	1	1	1	420	46.3	7.21	0	1
FALSE	High	Master Protein	Q13835	Plakophilin-1 OS=Homo sapiens OX=9606 GN=PKP1 PE=1 SV=2	0	2.004	2	1	1	1	1	747	82.8	9.13	2.94	1
FALSE	High	Master Protein	O75531	Barrier-to-autointegration factor OS=Homo sapiens OX=9606 GN=BANF1 PE=1 SV=1	0	1.973	13	1	1	1	1	89	10.1	6.09	2.18	1
FALSE	High	Master Protein	P32320	Cytidine deaminase OS=Homo sapiens OX=9606 GN=CDA PE=1 SV=2	0	1.927	15	1	1	1	1	146	16.2	6.92	2.58	1
FALSE	High	Master Protein	F8W727	60S ribosomal protein L32 OS=Homo sapiens OX=9606 GN=RPL32 PE=1 SV=1	0	1.874	8	1	1	1	1	153	18	10.59	2.14	1
FALSE	High	Master Protein	P14174	Macrophage migration inhibitory factor OS=Homo sapiens OX=9606 GN=MIF PE=1 SV=4	0	1.857	8	1	1	1	1	115	12.5	7.88	1.62	1
FALSE	High	Master Protein	P20073	Annexin A7 OS=Homo sapiens OX=9606 GN=ANXA7 PE=1 SV=3	0	1.855	2	1	1	1	1	488	52.7	5.68	0	1
FALSE	High	Master Protein	P50914	60S ribosomal protein L14 OS=Homo sapiens OX=9606 GN=RPL14 PE=1 SV=4	0	1.854	5	1	1	1	1	215	23.4	10.93	0	1
FALSE	High	Master Protein	P47914	60S ribosomal protein L29 OS=Homo sapiens OX=9606 GN=RPL29 PE=1 SV=2	0	1.851	9	1	1	1	1	159	17.7	11.66	2.12	1
FALSE	High	Master Protein	Q6IPX4	40S ribosomal protein S16 OS=Homo sapiens OX=9606 GN=RPS16 PE=1 SV=1	0	1.832	7	1	1	1	1	152	17.1	10.96	0	1
FALSE	High	Master Protein	O15145	Actin-related protein 2/3 complex subunit 3 OS=Homo sapiens OX=9606 GN=ARPC3 PE=1 SV=3	0	1.803	6	1	1	1	1	178	20.5	8.59	2.04	1
FALSE	High	Master Protein	A8MU27	Small ubiquitin-related modifier 3 OS=Homo sapiens OX=9606 GN=SUMO3 PE=1 SV=1	0	1.779	8	1	1	1	1	147	16.9	9.67	1.78	1
FALSE	High	Master Protein	Q15149	Plectin OS=Homo sapiens OX=9606 GN=PLEC PE=1 SV=3	0	1.769	0	1	1	1	1	4684	531.5	5.96	2.45	1
FALSE	High	Master Protein	P12273	Prolactin-inducible protein OS=Homo sapiens OX=9606 GN=PIP PE=1 SV=1	0	1.75	8	1	1	1	1	146	16.6	8.05	2.35	1
FALSE	High	Master Protein	Q14315	Filamin-C OS=Homo sapiens OX=9606 GN=FLNC PE=1 SV=3	0	1.737	0	1	1	1	1	2725	290.8	5.97	2.07	1
FALSE	High	Master Protein	P62258	14-3-3 protein epsilon OS=Homo sapiens OX=9606 GN=YWHAE PE=1 SV=1	0	1.714	4	1	1	1	1	255	29.2	4.74	1.89	1
FALSE	High	Master Protein	O95470	Sphingosine-1-phosphate lyase 1 OS=Homo sapiens OX=9606 GN=SGPL1 PE=1 SV=3	0	1.699	3	1	1	1	1	568	63.5	9.16	1.75	1
FALSE	High	Master Protein	P39019	40S ribosomal protein S19 OS=Homo sapiens OX=9606 GN=RPS19 PE=1 SV=2	0	1.697	6	1	1	1	1	145	16.1	10.32	0	1
FALSE	High	Master Protein	P21912	Succinate dehydrogenase [ubiquinone] iron-sulfur subunit, mitochondrial OS=Homo sapiens OX=9606 GN=SDHB PE=1 SV=3	0	1.675	4	1	1	1	1	280	31.6	8.76	2.55	1
FALSE	High	Master Protein	P14618	Pyruvate kinase PKM OS=Homo sapiens OX=9606 GN=PKM PE=1 SV=4	0	1.667	3	1	1	1	1	531	57.9	7.84	2.33	1
FALSE	High	Master Protein	Q96EP5	DAZ-associated protein 1 OS=Homo sapiens OX=9606 GN=DAZAP1 PE=1 SV=1	0	1.643	4	1	2	1	1	407	43.4	8.56	4.93	1
FALSE	High	Master Protein	P25815	Protein S100-P OS=Homo sapiens OX=9606 GN=S100P PE=1 SV=2	0	1.635	14	1	1	1	1	95	10.4	4.88	0	1
FALSE	High	Master Protein	P68871	Hemoglobin subunit beta OS=Homo sapiens OX=9606 GN=HBB PE=1 SV=2	0	1.629	6	1	1	1	1	147	16	7.28	2.24	1
FALSE	High	Master Protein	Q9UPQ9	Trinucleotide repeat-containing gene 6B protein OS=Homo sapiens OX=9606 GN=TNRC6B PE=1 SV=4	0	1.612	1	1	1	1	1	1833	193.9	6.76	0	1
FALSE	High	Master Protein	O43175	D-3-phosphoglycerate dehydrogenase OS=Homo sapiens OX=9606 GN=PHGDH PE=1 SV=4	0	1.598	3	1	1	1	1	533	56.6	6.71	2.85	1
FALSE	High	Master Protein	A0A2U3TZU2	Glucose-6-phosphate isomerase OS=Homo sapiens OX=9606 GN=GPI PE=1 SV=1	0	1.592	3	1	1	1	1	597	67.2	8.97	2.64	1
FALSE	High	Master Protein	S4R3N1	HSPE1-MOB4 readthrough OS=Homo sapiens OX=9606 GN=HSPE1-MOB4 PE=3 SV=1	0	1.575	5	1	1	1	1	261	29.7	6.16	2.01	1
FALSE	High	Master Protein	I3L3D5	Profilin (Fragment) OS=Homo sapiens OX=9606 GN=PFN1 PE=1 SV=1	0	1.57	10	1	1	1	1	165	17.5	11.4	2.45	1
FALSE	High	Master Protein	P06748	Nucleophosmin OS=Homo sapiens OX=9606 GN=NPM1 PE=1 SV=2	0	1.561	7	1	1	1	1	294	32.6	4.78	1.97	1
FALSE	High	Master Protein	P14854	Cytochrome c oxidase subunit 6B1 OS=Homo sapiens OX=9606 GN=COX6B1 PE=1 SV=2	0	1.555	13	1	1	1	1	86	10.2	7.05	2.04	1
FALSE	High	Master Protein	P62851	40S ribosomal protein S25 OS=Homo sapiens OX=9606 GN=RPS25 PE=1 SV=1	0	1.546	7	1	1	1	1	125	13.7	10.11	2.05	1
FALSE	High	Master Protein	P59665	Neutrophil defensin 1 OS=Homo sapiens OX=9606 GN=DEFA1 PE=1 SV=1	0	1.481	10	1	1	1	1	94	10.2	6.99	0	1
FALSE	High	Master Protein	A0A1W2PQS6	RPS10-NUDT3 readthrough OS=Homo sapiens OX=9606 GN=RPS10-NUDT3 PE=4 SV=1	0	1.469	3	1	1	1	1	291	33.1	9.29	0	1
FALSE	High	Master Protein	P00387	NADH-cytochrome b5 reductase 3 OS=Homo sapiens OX=9606 GN=CYB5R3 PE=1 SV=3	0	1.447	4	1	1	1	1	301	34.2	7.59	1.96	1
FALSE	High	Master Protein	O75955	Flotillin-1 OS=Homo sapiens OX=9606 GN=FLOT1 PE=1 SV=3	0	1.44	3	1	1	1	1	427	47.3	7.49	0	1
FALSE	High	Master Protein	Q92567	Protein FAM168A OS=Homo sapiens OX=9606 GN=FAM168A PE=1 SV=2	0	1.418	4	1	1	1	1	244	26.2	8.98	0	1
FALSE	High	Master Protein	P46778	60S ribosomal protein L21 OS=Homo sapiens OX=9606 GN=RPL21 PE=1 SV=2	0	1.415	9	1	1	1	1	160	18.6	10.49	3.05	1
FALSE	High	Master Protein	P49411	Elongation factor Tu, mitochondrial OS=Homo sapiens OX=9606 GN=TUFM PE=1 SV=2	0	1.415	2	1	1	1	1	452	49.5	7.61	0	1
FALSE	High	Master Protein	P62857	40S ribosomal protein S28 OS=Homo sapiens OX=9606 GN=RPS28 PE=1 SV=1	0	1.412	16	1	1	1	1	69	7.8	10.7	1.68	1
FALSE	High	Master Protein	P62273	40S ribosomal protein S29 OS=Homo sapiens OX=9606 GN=RPS29 PE=1 SV=2	0	1.397	14	1	1	1	1	56	6.7	10.13	0	1
FALSE	High	Master Protein	P61978	Heterogeneous nuclear ribonucleoprotein K OS=Homo sapiens OX=9606 GN=HNRNPK PE=1 SV=1	0	1.387	3	1	1	1	1	463	50.9	5.54	2.59	1
FALSE	High	Master Protein	P48643	T-complex protein 1 subunit epsilon OS=Homo sapiens OX=9606 GN=CCT5 PE=1 SV=1	0	1.379	3	1	1	1	1	541	59.6	5.66	2.2	1
FALSE	High	Master Protein	Q14498	RNA-binding protein 39 OS=Homo sapiens OX=9606 GN=RBM39 PE=1 SV=2	0	1.34	2	1	1	1	1	530	59.3	10.1	2.3	1
FALSE	High	Master Protein	P62888	60S ribosomal protein L30 OS=Homo sapiens OX=9606 GN=RPL30 PE=1 SV=2	0	1.335	10	1	1	1	1	115	12.8	9.63	2.08	1
FALSE	High	Master Protein	P20930	Filaggrin OS=Homo sapiens OX=9606 GN=FLG PE=1 SV=3	0	1.322	0	1	1	1	1	4061	434.9	9.25	2.01	1
FALSE	High	Master Protein	Q9NZT1	Calmodulin-like protein 5 OS=Homo sapiens OX=9606 GN=CALML5 PE=1 SV=2	0.002	1.283	5	1	1	1	1	146	15.9	4.44	1.71	1
FALSE	High	Master Protein	Q9UBX7	Kallikrein-11 OS=Homo sapiens OX=9606 GN=KLK11 PE=1 SV=2	0.002	1.283	2	1	9	1	1	282	31	8.94	13.09	1
FALSE	High	Master Protein	Q15369	Elongin-C OS=Homo sapiens OX=9606 GN=ELOC PE=1 SV=1	0.002	1.268	9	1	1	1	1	112	12.5	4.78	1.81	1
FALSE	High	Master Protein	Q9H479	Fructosamine-3-kinase OS=Homo sapiens OX=9606 GN=FN3K PE=1 SV=1	0.002	1.266	3	1	1	1	1	309	35.1	7.55	0	1
FALSE	High	Master Protein	A6NKH3	Putative 60S ribosomal protein L37a-like protein OS=Homo sapiens OX=9606 GN=RPL37AP8 PE=5 SV=2	0.002	1.248	9	1	1	1	1	93	10.6	10.2	1.97	1
FALSE	High	Master Protein	K7ELC2	40S ribosomal protein S15 OS=Homo sapiens OX=9606 GN=RPS15 PE=1 SV=1	0.002	1.241	18	1	1	1	1	152	17.7	10.39	0	1
FALSE	High	Master Protein	P62913	60S ribosomal protein L11 OS=Homo sapiens OX=9606 GN=RPL11 PE=1 SV=2	0.002	1.216	4	1	1	1	1	178	20.2	9.6	0	1
FALSE	High	Master Protein	Q5T440	Putative transferase CAF17, mitochondrial OS=Homo sapiens OX=9606 GN=IBA57 PE=1 SV=1	0.002	1.212	3	1	1	1	1	356	38.1	9.83	2.48	1
FALSE	High	Master Protein	O43150	Arf-GAP with SH3 domain, ANK repeat and PH domain-containing protein 2 OS=Homo sapiens OX=9606 GN=ASAP2 PE=1 SV=3	0.002	1.208	1	1	5	1	1	1006	111.6	6.68	1.68	1
FALSE	High	Master Protein	Q13263	Transcription intermediary factor 1-beta OS=Homo sapiens OX=9606 GN=TRIM28 PE=1 SV=5	0.002	1.186	2	1	1	1	1	835	88.5	5.77	3.17	1
FALSE	High	Master Protein	O95486	Protein transport protein Sec24A OS=Homo sapiens OX=9606 GN=SEC24A PE=1 SV=2	0.002	1.186	1	1	1	1	1	1093	119.7	7.66	0	1
FALSE	High	Master Protein	Q9HCC0	Methylcrotonoyl-CoA carboxylase beta chain, mitochondrial OS=Homo sapiens OX=9606 GN=MCCC2 PE=1 SV=1	0.002	1.159	3	1	1	1	1	563	61.3	7.68	1.68	1
FALSE	High	Master Protein	P23490	Loricrin OS=Homo sapiens OX=9606 GN=LOR PE=1 SV=2	0.002	1.149	3	1	1	1	1	312	25.7	8.09	1.75	1
FALSE	High	Master Protein	O95503	Chromobox protein homolog 6 OS=Homo sapiens OX=9606 GN=CBX6 PE=1 SV=1	0.002	1.148	2	1	1	1	1	412	43.9	10.01	0	1
FALSE	High	Master Protein	Q04837	Single-stranded DNA-binding protein, mitochondrial OS=Homo sapiens OX=9606 GN=SSBP1 PE=1 SV=1	0.002	1.147	5	1	1	1	1	148	17.2	9.6	1.8	1
FALSE	High	Master Protein	P14625	Endoplasmin OS=Homo sapiens OX=9606 GN=HSP90B1 PE=1 SV=1	0.002	1.146	1	1	1	1	1	803	92.4	4.84	0	1
FALSE	High	Master Protein	P00966	Argininosuccinate synthase OS=Homo sapiens OX=9606 GN=ASS1 PE=1 SV=2	0.002	1.135	2	1	1	1	1	412	46.5	8.02	0	1
FALSE	High	Master Protein	A0A0A0MSG2	Four and a half LIM domains protein 2 OS=Homo sapiens OX=9606 GN=FHL2 PE=1 SV=1	0.002	1.131	2	1	1	1	1	395	44.8	8.06	2.04	1
FALSE	High	Master Protein	Q14563	Semaphorin-3A OS=Homo sapiens OX=9606 GN=SEMA3A PE=1 SV=1	0.002	1.105	3	1	1	1	1	771	88.8	7.42	0	1
FALSE	High	Master Protein	P62241	40S ribosomal protein S8 OS=Homo sapiens OX=9606 GN=RPS8 PE=1 SV=2	0.002	1.104	7	1	2	1	1	208	24.2	10.32	4.51	1
FALSE	High	Master Protein	F8VW96	Cysteine and glycine-rich protein 2 OS=Homo sapiens OX=9606 GN=CSRP2 PE=1 SV=1	0.002	1.101	4	1	1	1	1	243	26.7	8.48	0	1
FALSE	High	Master Protein	A0A087WZN1	Isocitrate dehydrogenase [NAD] subunit, mitochondrial OS=Homo sapiens OX=9606 GN=IDH3B PE=1 SV=1	0.002	1.097	3	1	1	1	1	387	42.4	8.46	1.74	1
FALSE	High	Master Protein	P78357	Contactin-associated protein 1 OS=Homo sapiens OX=9606 GN=CNTNAP1 PE=1 SV=1	0.002	1.091	1	1	1	1	1	1384	156.2	7.05	0	1
FALSE	High	Master Protein	Q8NHM5	Lysine-specific demethylase 2B OS=Homo sapiens OX=9606 GN=KDM2B PE=1 SV=1	0.002	1.076	1	1	1	1	1	1336	152.5	8.56	0	1
FALSE	High	Master Protein	Q8NCA5	Protein FAM98A OS=Homo sapiens OX=9606 GN=FAM98A PE=1 SV=1	0.003	1.071	2	1	1	1	1	519	55.4	9.03	0	1
FALSE	High	Master Protein	Q9NX20	39S ribosomal protein L16, mitochondrial OS=Homo sapiens OX=9606 GN=MRPL16 PE=1 SV=1	0.003	1.058	4	1	1	1	1	251	28.4	10.13	1.94	1
FALSE	High	Master Protein	Q02078	Myocyte-specific enhancer factor 2A OS=Homo sapiens OX=9606 GN=MEF2A PE=1 SV=1	0.003	1.057	2	1	1	1	1	507	54.8	7.91	1.92	1
FALSE	High	Master Protein	G8JLG2	CDSN OS=Homo sapiens OX=9606 GN=CDSN PE=1 SV=1	0.003	1.056	3	1	1	1	1	529	51.6	8.44	1.93	1
FALSE	High	Master Protein	P50238	Cysteine-rich protein 1 OS=Homo sapiens OX=9606 GN=CRIP1 PE=1 SV=3	0.003	1.04	18	1	1	1	1	77	8.5	8.75	0	1
FALSE	High	Master Protein	Q86UW9	Probable E3 ubiquitin-protein ligase DTX2 OS=Homo sapiens OX=9606 GN=DTX2 PE=1 SV=3	0.003	1.037	2	1	1	1	1	622	67.2	8.47	0	1
FALSE	High	Master Protein	Q8TF66	Leucine-rich repeat-containing protein 15 OS=Homo sapiens OX=9606 GN=LRRC15 PE=2 SV=2	0.003	1.031	2	1	1	1	1	581	64.3	6.71	0	1
FALSE	High	Master Protein	P22314	Ubiquitin-like modifier-activating enzyme 1 OS=Homo sapiens OX=9606 GN=UBA1 PE=1 SV=3	0.003	1.022	1	1	1	1	1	1058	117.8	5.76	0	1
FALSE	High	Master Protein	P35625	Metalloproteinase inhibitor 3 OS=Homo sapiens OX=9606 GN=TIMP3 PE=1 SV=2	0.003	1.021	4	1	1	1	1	211	24.1	8.72	0	1
FALSE	High	Master Protein	H0Y987	Phosphoacetylglucosamine mutase (Fragment) OS=Homo sapiens OX=9606 GN=PGM3 PE=1 SV=1	0.003	1.013	9	1	1	1	1	197	21.8	8.41	0	1
FALSE	High	Master Protein	Q05519	Serine/arginine-rich splicing factor 11 OS=Homo sapiens OX=9606 GN=SRSF11 PE=1 SV=1	0.003	1.012	3	1	1	1	1	484	53.5	10.52	0	1
FALSE	High	Master Protein	Q7Z4W1	L-xylulose reductase OS=Homo sapiens OX=9606 GN=DCXR PE=1 SV=2	0.004	0.992	5	1	1	1	1	244	25.9	8.1	0	1
FALSE	High	Master Protein	Q9BTL3	RNA guanine-N7 methyltransferase activating subunit OS=Homo sapiens OX=9606 GN=RAMAC PE=1 SV=1	0.004	0.989	7	1	1	1	1	118	14.4	8.94	0	1
FALSE	High	Master Protein	J3KPS3	Fructose-bisphosphate aldolase OS=Homo sapiens OX=9606 GN=ALDOA PE=1 SV=1	0.008	0.984	2	1	1	1	1	368	39.8	8.09	0	1
FALSE	High	Master Protein	C9JJN9	Vacuolar protein sorting-associated protein 8 homolog OS=Homo sapiens OX=9606 GN=VPS8 PE=1 SV=1	0.009	0.977	1	1	1	1	1	1428	161.7	5.67	2.94	1
FALSE	High	Master Protein	Q8TAU3	Zinc finger protein 417 OS=Homo sapiens OX=9606 GN=ZNF417 PE=1 SV=2	0.009	0.975	2	1	1	1	1	575	65.7	9.06	2.1	1
FALSE	High	Master Protein	Q96AB3	Isochorismatase domain-containing protein 2 OS=Homo sapiens OX=9606 GN=ISOC2 PE=1 SV=1	0.009	0.967	7	1	1	1	1	205	22.3	7.77	2.77	1
FALSE	High	Master Protein	P61247	40S ribosomal protein S3a OS=Homo sapiens OX=9606 GN=RPS3A PE=1 SV=2	0.009	0.957	3	1	1	1	1	264	29.9	9.73	1.83	1
FALSE	High	Master Protein	P62854	40S ribosomal protein S26 OS=Homo sapiens OX=9606 GN=RPS26 PE=1 SV=3	0.009	0.957	8	1	1	1	1	115	13	11	0	1
FALSE	High	Master Protein	P15531	Nucleoside diphosphate kinase A OS=Homo sapiens OX=9606 GN=NME1 PE=1 SV=1	0.009	0.95	8	1	1	1	1	152	17.1	6.19	0	1
FALSE	High	Master Protein	Q8WVV4	Protein POF1B OS=Homo sapiens OX=9606 GN=POF1B PE=1 SV=3	0.009	0.95	3	1	1	1	1	589	68	6.32	1.79	1
FALSE	Medium	Master Protein	P01040	Cystatin-A OS=Homo sapiens OX=9606 GN=CSTA PE=1 SV=1	0.01	0.94	12	1	1	1	1	98	11	5.5	0	1
FALSE	Medium	Master Protein	P00558	Phosphoglycerate kinase 1 OS=Homo sapiens OX=9606 GN=PGK1 PE=1 SV=3	0.01	0.931	4	1	1	1	1	417	44.6	8.1	1.64	1
FALSE	Medium	Master Protein	Q08380	Galectin-3-binding protein OS=Homo sapiens OX=9606 GN=LGALS3BP PE=1 SV=1	0.01	0.927	2	1	1	1	1	585	65.3	5.27	1.63	1
FALSE	Medium	Master Protein	P62633	Cellular nucleic acid-binding protein OS=Homo sapiens OX=9606 GN=CNBP PE=1 SV=1	0.01	0.927	5	1	1	1	1	177	19.5	7.71	1.79	1
FALSE	Medium	Master Protein	Q9UHF1	Epidermal growth factor-like protein 7 OS=Homo sapiens OX=9606 GN=EGFL7 PE=1 SV=3	0.01	0.92	5	1	1	1	1	273	29.6	8.16	1.63	1
