# Supplementary material for: Probing the Immunoreceptor Tyrosine-Based Inhibition Motif Interaction Protein Partners with Proteomics
Source: Molecules. 2024 Apr 25;29(9):1977. doi: 10.3390/molecules29091977 (PMC11085718; doi:10.3390/molecules29091977)
Supplement: Supplementary file 1 [file molecules-29-01977-s001.zip › Table S7-SHP2.xlsx]

## Sheet: Proteins
Checked	Protein FDR Confidence	Master	Accession	Description	Exp. q-value	Sum PEP Score	Coverage	# Peptides	# PSMs	# Unique Peptides	# Protein Groups	# AAs	MW [kDa]	calc. pI	Found in Sample: [S1] F1: Sample	Modifications	emPAI	Score Mascot	# Peptides Mascot
TRUE	High	Master Protein	P35579	Myosin-9 OS=Homo sapiens GN=MYH9 PE=1 SV=4	0	1390.12	70.102	162	412	137	1	1960	226.4	5.6	High	Phospho [S1943(100)]	144.476	11543	162
TRUE	High	Master Protein	P78527	DNA-dependent protein kinase catalytic subunit OS=Homo sapiens GN=PRKDC PE=1 SV=3	0	425.336	27.5194	102	130	102	1	4128	468.8	7.12	High		1.763	3007	102
TRUE	High	Master Protein	P35580	Myosin-10 OS=Homo sapiens GN=MYH10 PE=1 SV=3	0	422.532	45.9514	80	126	57	1	1976	228.9	5.54	High		5.241	3110	80
TRUE	High	Master Protein	P31327	Carbamoyl-phosphate synthase [ammonia], mitochondrial OS=Homo sapiens GN=CPS1 PE=1 SV=2	0	375.647	56.8	65	129	64	1	1500	164.8	6.74	High		9	2762	65
TRUE	High	Master Protein	P04264	Keratin, type II cytoskeletal 1 OS=Homo sapiens GN=KRT1 PE=1 SV=6	0	375.067	62.4224	46	188	40	1	644	66	8.12	High		105.247	5812	46
TRUE	High	Master Protein	P35527	Keratin, type I cytoskeletal 9 OS=Homo sapiens GN=KRT9 PE=1 SV=3	0	364.746	70.626	38	118	37	1	623	62	5.24	High		86.333	4047	38
TRUE	High	Master Protein	P38646	Stress-70 protein, mitochondrial OS=Homo sapiens GN=HSPA9 PE=1 SV=2	0	359.455	66.5685	49	137	49	1	679	73.6	6.16	High		52.367	4096	49
TRUE	High	Master Protein	P60709	Actin, cytoplasmic 1 OS=Homo sapiens GN=ACTB PE=1 SV=1	0	356.81	71.7333	27	220	14	1	375	41.7	5.48	High		547.442	5493	27
TRUE	High	Master Protein	P21333	Filamin-A OS=Homo sapiens GN=FLNA PE=1 SV=4	0	351.08	37.4764	72	115	67	1	2647	280.6	6.06	High		2.736	2578	72
TRUE	High	Master Protein	P08238	Heat shock protein HSP 90-beta OS=Homo sapiens GN=HSP90AB1 PE=1 SV=4	0	319.045	53.453	44	121	27	1	724	83.2	5.03	High	Phospho [S255(100)]	39.239	2870	44
TRUE	High	Master Protein	P07437	Tubulin beta chain OS=Homo sapiens GN=TUBB PE=1 SV=2	0	308.282	82.2072	29	189	5	1	444	49.6	4.89	High		405.159	4958	29
TRUE	High	Master Protein	P68371	Tubulin beta-4B chain OS=Homo sapiens GN=TUBB4B PE=1 SV=1	0	288.031	82.0225	29	168	4	1	445	49.8	4.89	High		299.788	4398	29
TRUE	High	Master Protein	P13645	Keratin, type I cytoskeletal 10 OS=Homo sapiens GN=KRT10 PE=1 SV=6	0	273.981	56.5068	32	81	29	1	584	58.8	5.21	High		70.969	2715	32
TRUE	High	Master Protein	P35908	Keratin, type II cytoskeletal 2 epidermal OS=Homo sapiens GN=KRT2 PE=1 SV=2	0	259.274	71.6745	42	88	29	1	639	65.4	8	High		22.556	2348	42
TRUE	High	Master Protein	Q92616	eIF-2-alpha kinase activator GCN1 OS=Homo sapiens GN=GCN1 PE=1 SV=6	0	257.931	30.7376	69	87	69	1	2671	292.6	7.47	High		1.653	1615	69
TRUE	High	Master Protein	Q9BQE3	Tubulin alpha-1C chain OS=Homo sapiens GN=TUBA1C PE=1 SV=1	0	246.481	69.265	30	117	11	1	449	49.9	5.1	High		109.069	3699	30
TRUE	High	Master Protein	Q01813	ATP-dependent 6-phosphofructokinase, platelet type OS=Homo sapiens GN=PFKP PE=1 SV=2	0	239.054	54.4643	36	60	33	1	784	85.5	7.55	High		12.154	1642	36
TRUE	High	Master Protein	P07900	Heat shock protein HSP 90-alpha OS=Homo sapiens GN=HSP90AA1 PE=1 SV=5	0	230.028	45.6284	34	78	19	1	732	84.6	5.02	High		14.505	1789	34
TRUE	High	Master Protein	Q13885	Tubulin beta-2A chain OS=Homo sapiens GN=TUBB2A PE=1 SV=1	0	227.303	60	24	145	3	1	445	49.9	4.89	High		109.53	3480	24
TRUE	High	Master Protein	P07814	Bifunctional glutamate/proline--tRNA ligase OS=Homo sapiens GN=EPRS PE=1 SV=5	0	227.261	40.0794	53	71	53	1	1512	170.5	7.33	High		3.528	1272	53
TRUE	High	Master Protein	P11142	Heat shock cognate 71 kDa protein OS=Homo sapiens GN=HSPA8 PE=1 SV=1	0	224.152	48.7616	34	103	29	1	646	70.9	5.52	High		26.283	2351	34
TRUE	High	Master Protein	P68366	Tubulin alpha-4A chain OS=Homo sapiens GN=TUBA4A PE=1 SV=1	0	223.635	60.2679	25	116	6	1	448	49.9	5.06	High		81.54	3307	25
TRUE	High	Master Protein	P53621	Coatomer subunit alpha OS=Homo sapiens GN=COPA PE=1 SV=2	0	216.348	45.7516	40	61	40	1	1224	138.3	7.66	High		2.935	1420	40
TRUE	High	Master Protein	P11021	78 kDa glucose-regulated protein OS=Homo sapiens GN=HSPA5 PE=1 SV=2	0	207.371	53.0581	34	76	33	1	654	72.3	5.16	High		15.577	1918	34
TRUE	High	Master Protein	P68104	Elongation factor 1-alpha 1 OS=Homo sapiens GN=EEF1A1 PE=1 SV=1	0	182.889	66.0173	22	88	9	1	462	50.1	9.01	High		29.2	1838	22
TRUE	High	Master Protein	P78386	Keratin, type II cuticular Hb5 OS=Homo sapiens GN=KRT85 PE=1 SV=1	0	180.277	41.4201	33	162	8	1	507	55.8	6.55	High		20.102	3639	33
TRUE	High	Master Protein	P00966	Argininosuccinate synthase OS=Homo sapiens GN=ASS1 PE=1 SV=2	0	170.516	60.9223	21	48	21	1	412	46.5	8.02	High		23.245	1189	21
TRUE	High	Master Protein	Q15323	Keratin, type I cuticular Ha1 OS=Homo sapiens GN=KRT31 PE=1 SV=3	0	170.164	38.9423	20	88	3	1	416	47.2	4.88	High		11.915	2357	20
TRUE	High	Master Protein	P68032	Actin, alpha cardiac muscle 1 OS=Homo sapiens GN=ACTC1 PE=1 SV=1	0	166.113	36.87	17	138	4	1	377	42	5.39	High		39.616	2719	17
TRUE	High	Master Protein	P0DMV9	Heat shock 70 kDa protein 1B OS=Homo sapiens GN=HSPA1B PE=1 SV=1	0	164.382	49.142	29	56	24	1	641	70	5.66	High		8.412	1363	29
TRUE	High	Master Protein	P78385	Keratin, type II cuticular Hb3 OS=Homo sapiens GN=KRT83 PE=1 SV=2	0	163.132	38.3367	32	139	1	1	493	54.2	5.64	High		31.819	2915	32
TRUE	High	Master Protein	O43790	Keratin, type II cuticular Hb6 OS=Homo sapiens GN=KRT86 PE=1 SV=1	0	162.858	41.9753	31	143	2	1	486	53.5	5.66	High		17.078	3134	31
TRUE	High	Master Protein	A6NCN2	Putative keratin-87 protein OS=Homo sapiens GN=KRT87P PE=5 SV=4	0	158.876	50.1961	25	94	4	1	255	29.1	5.8	High		111.202	1915	25
TRUE	High	Master Protein	P06576	ATP synthase subunit beta, mitochondrial OS=Homo sapiens GN=ATP5B PE=1 SV=3	0	154.043	50.8507	18	46	18	1	529	56.5	5.4	High		8.284	1130	18
TRUE	High	Master Protein	Q7Z406	Myosin-14 OS=Homo sapiens GN=MYH14 PE=1 SV=2	0	149.048	20.0501	34	51	24	1	1995	227.7	5.6	High		0.981	1198	34
TRUE	High	Master Protein	P49411	Elongation factor Tu, mitochondrial OS=Homo sapiens GN=TUFM PE=1 SV=2	0	142.051	53.7611	20	43	20	1	452	49.5	7.61	High		7.66	971	20
TRUE	High	Master Protein	P25705	ATP synthase subunit alpha, mitochondrial OS=Homo sapiens GN=ATP5A1 PE=1 SV=1	0	141.553	47.7396	28	55	28	1	553	59.7	9.13	High		7.83	1413	28
TRUE	High	Master Protein	P14618	Pyruvate kinase PKM OS=Homo sapiens GN=PKM PE=1 SV=4	0	137.532	57.4388	24	35	24	1	531	57.9	7.84	High		4.712	933	24
TRUE	High	Master Protein	P36578	60S ribosomal protein L4 OS=Homo sapiens GN=RPL4 PE=1 SV=5	0	135.633	46.6042	22	44	22	1	427	47.7	11.06	High		9	1031	22
TRUE	High	Master Protein	P62701	40S ribosomal protein S4, X isoform OS=Homo sapiens GN=RPS4X PE=1 SV=2	0	134.346	71.4829	24	58	24	1	263	29.6	10.15	High		49.119	1165	24
TRUE	High	Master Protein	P06733	Alpha-enolase OS=Homo sapiens GN=ENO1 PE=1 SV=2	0	123.953	61.2903	24	43	20	1	434	47.1	7.39	High		9.826	1137	24
TRUE	High	Master Protein	P33993	DNA replication licensing factor MCM7 OS=Homo sapiens GN=MCM7 PE=1 SV=4	0	122.012	49.9305	27	35	27	1	719	81.3	6.46	High		3.292	716	27
TRUE	High	Master Protein	P11586	C-1-tetrahydrofolate synthase, cytoplasmic OS=Homo sapiens GN=MTHFD1 PE=1 SV=3	0	120.348	45.1337	30	43	30	1	935	101.5	7.3	High		2.687	853	30
TRUE	High	Master Protein	Q00839	Heterogeneous nuclear ribonucleoprotein U OS=Homo sapiens GN=HNRNPU PE=1 SV=6	0	120.043	33.5758	22	38	22	1	825	90.5	6	High		3.41	803	22
TRUE	High	Master Protein	P63244	Receptor of activated protein C kinase 1 OS=Homo sapiens GN=RACK1 PE=1 SV=3	0	119.591	70.0315	20	37	20	1	317	35.1	7.69	High		12.689	973	20
TRUE	High	Master Protein	Q9Y678	Coatomer subunit gamma-1 OS=Homo sapiens GN=COPG1 PE=1 SV=1	0	119.371	43.7071	27	37	25	1	874	97.7	5.47	High		3.311	650	27
TRUE	High	Master Protein	O00159	Unconventional myosin-Ic OS=Homo sapiens GN=MYO1C PE=1 SV=4	0	119.232	35.1834	28	35	28	1	1063	121.6	9.41	High		1.857	699	28
TRUE	High	Master Protein	P60842	Eukaryotic initiation factor 4A-I OS=Homo sapiens GN=EIF4A1 PE=1 SV=1	0	118.259	52.4631	18	43	15	1	406	46.1	5.48	High		15.156	891	18
TRUE	High	Master Protein	P04792	Heat shock protein beta-1 OS=Homo sapiens GN=HSPB1 PE=1 SV=2	0	118.009	86.8293	16	42	16	1	205	22.8	6.4	High	Phospho [S15(100); S82(98.8)]	141.51	1004	16
TRUE	High	Master Protein	P01834	Immunoglobulin kappa constant OS=Homo sapiens GN=IGKC PE=1 SV=2	0	117.919	85.9813	9	80	9	1	107	11.8	6.52	High		1583.89	2164	9
TRUE	High	Master Protein	P28799	Granulins OS=Homo sapiens GN=GRN PE=1 SV=2	0	116.776	34.9073	15	50	15	1	593	63.5	6.83	High		5.629	1231	15
TRUE	High	Master Protein	P02538	Keratin, type II cytoskeletal 6A OS=Homo sapiens GN=KRT6A PE=1 SV=3	0	113.83	42.9078	28	54	3	1	564	60	8	High		6.263	1135	28
TRUE	High	Master Protein	O95340	Bifunctional 3'-phosphoadenosine 5'-phosphosulfate synthase 2 OS=Homo sapiens GN=PAPSS2 PE=1 SV=2	0	112.262	43.1596	20	33	19	1	614	69.5	8.03	High		4.712	648	20
TRUE	High	Master Protein	P39023	60S ribosomal protein L3 OS=Homo sapiens GN=RPL3 PE=1 SV=2	0	111.967	44.9132	19	33	19	1	403	46.1	10.18	High		15.876	775	19
TRUE	High	Master Protein	P02533	Keratin, type I cytoskeletal 14 OS=Homo sapiens GN=KRT14 PE=1 SV=4	0	110.763	54.661	25	41	7	1	472	51.5	5.16	High		6.686	996	25
TRUE	High	Master Protein	P04259	Keratin, type II cytoskeletal 6B OS=Homo sapiens GN=KRT6B PE=1 SV=5	0	109.703	39.8936	27	55	2	1	564	60	8	High		6.263	1137	27
TRUE	High	Master Protein	P46940	Ras GTPase-activating-like protein IQGAP1 OS=Homo sapiens GN=IQGAP1 PE=1 SV=1	0	109.129	21.6657	26	32	26	1	1657	189.1	6.48	High		1.02	621	26
TRUE	High	Master Protein	Q14525	Keratin, type I cuticular Ha3-II OS=Homo sapiens GN=KRT33B PE=1 SV=3	0	108.28	33.9109	16	66	4	1	404	46.2	4.84	High		5.629	1661	16
TRUE	High	Master Protein	P34897	Serine hydroxymethyltransferase, mitochondrial OS=Homo sapiens GN=SHMT2 PE=1 SV=3	0	108.041	48.4127	19	33	19	1	504	56	8.53	High		5.225	692	19
TRUE	High	Master Protein	Q9BUF5	Tubulin beta-6 chain OS=Homo sapiens GN=TUBB6 PE=1 SV=1	0	107.313	60.9865	17	66	9	1	446	49.8	4.88	High		9	1483	17
TRUE	High	Master Protein	P54136	Arginine--tRNA ligase, cytoplasmic OS=Homo sapiens GN=RARS PE=1 SV=2	0	106.427	49.5455	27	37	27	1	660	75.3	6.68	High		3.725	642	27
TRUE	High	Master Protein	Q14204	Cytoplasmic dynein 1 heavy chain 1 OS=Homo sapiens GN=DYNC1H1 PE=1 SV=5	0	106.106	9.68575	36	38	36	1	4646	532.1	6.4	High		0.335	514	36
TRUE	High	Master Protein	Q92764	Keratin, type I cuticular Ha5 OS=Homo sapiens GN=KRT35 PE=2 SV=5	0	105.573	28.1319	15	52	7	1	455	50.3	4.91	High		3.642	1281	15
TRUE	High	Master Protein	P52701	DNA mismatch repair protein Msh6 OS=Homo sapiens GN=MSH6 PE=1 SV=2	0	105.176	23.9706	28	32	28	1	1360	152.7	6.9	High		1.371	690	28
TRUE	High	Master Protein	P61247	40S ribosomal protein S3a OS=Homo sapiens GN=RPS3A PE=1 SV=2	0	104.802	63.6364	18	39	18	1	264	29.9	9.73	High		25.367	960	18
TRUE	High	Master Protein	P13639	Elongation factor 2 OS=Homo sapiens GN=EEF2 PE=1 SV=4	0	102.08	36.5967	23	32	23	1	858	95.3	6.83	High		2.444	742	23
TRUE	High	Master Protein	P11498	Pyruvate carboxylase, mitochondrial OS=Homo sapiens GN=PC PE=1 SV=2	0	100.789	35.1443	27	38	27	1	1178	129.6	6.84	High		1.576	542	27
TRUE	High	Master Protein	P23396	40S ribosomal protein S3 OS=Homo sapiens GN=RPS3 PE=1 SV=2	0	99.88	76.9547	21	40	21	1	243	26.7	9.66	High		19.691	1019	21
TRUE	High	Master Protein	P13647	Keratin, type II cytoskeletal 5 OS=Homo sapiens GN=KRT5 PE=1 SV=3	0	99.268	37.7966	28	50	14	1	590	62.3	7.74	High		6.686	843	28
TRUE	High	Master Protein	Q99832	T-complex protein 1 subunit eta OS=Homo sapiens GN=CCT7 PE=1 SV=2	0	98.526	54.6961	21	30	21	1	543	59.3	7.65	High		3.948	587	21
TRUE	High	Master Protein	P55060	Exportin-2 OS=Homo sapiens GN=CSE1L PE=1 SV=3	0	96.811	29.3512	24	34	24	1	971	110.3	5.77	High		1.807	535	24
TRUE	High	Master Protein	P78371	T-complex protein 1 subunit beta OS=Homo sapiens GN=CCT2 PE=1 SV=4	0	95.357	45.7944	17	23	17	1	535	57.5	6.46	High		2.831	771	17
TRUE	High	Master Protein	P12236	ADP/ATP translocase 3 OS=Homo sapiens GN=SLC25A6 PE=1 SV=4	0	95.097	52.6846	17	37	2	1	298	32.8	9.74	High		11.328	793	17
TRUE	High	Master Protein	P04406	Glyceraldehyde-3-phosphate dehydrogenase OS=Homo sapiens GN=GAPDH PE=1 SV=3	0	95.089	63.8806	14	25	14	1	335	36	8.46	High		7.031	669	14
TRUE	High	Master Protein	P10809	60 kDa heat shock protein, mitochondrial OS=Homo sapiens GN=HSPD1 PE=1 SV=2	0	93.202	43.4555	20	27	20	1	573	61	5.87	High		3.354	697	20
TRUE	High	Master Protein	P16615	Sarcoplasmic/endoplasmic reticulum calcium ATPase 2 OS=Homo sapiens GN=ATP2A2 PE=1 SV=1	0	92.428	24.6641	19	27	19	1	1042	114.7	5.34	High		1.555	650	19
TRUE	High	Master Protein	P08779	Keratin, type I cytoskeletal 16 OS=Homo sapiens GN=KRT16 PE=1 SV=4	0	91.581	45.0317	21	33	8	1	473	51.2	5.05	High		4.532	771	21
TRUE	High	Master Protein	O14980	Exportin-1 OS=Homo sapiens GN=XPO1 PE=1 SV=1	0	91.389	22.2222	19	22	19	1	1071	123.3	6.06	High		1.27	451	19
TRUE	High	Master Protein	P15924	Desmoplakin OS=Homo sapiens GN=DSP PE=1 SV=3	0	90.657	11.0763	31	32	31	1	2871	331.6	6.81	High		0.428	521	31
TRUE	High	Master Protein	P05141	ADP/ATP translocase 2 OS=Homo sapiens GN=SLC25A5 PE=1 SV=7	0	89.631	41.9463	16	37	7	1	298	32.8	9.69	High		10.159	803	16
TRUE	High	Master Protein	P17987	T-complex protein 1 subunit alpha OS=Homo sapiens GN=TCP1 PE=1 SV=1	0	87.605	37.5899	19	25	19	1	556	60.3	6.11	High		3.084	528	19
TRUE	High	Master Protein	O76011	Keratin, type I cuticular Ha4 OS=Homo sapiens GN=KRT34 PE=1 SV=2	0	86.48	23.6239	13	51	3	1	436	49.4	5.06	High		4.505	1134	13
TRUE	High	Master Protein	P50991	T-complex protein 1 subunit delta OS=Homo sapiens GN=CCT4 PE=1 SV=4	0	85.434	49.9072	22	30	21	1	539	57.9	7.83	High		3.281	643	22
TRUE	High	Master Protein	Q06210	Glutamine--fructose-6-phosphate aminotransferase [isomerizing] 1 OS=Homo sapiens GN=GFPT1 PE=1 SV=3	0	84.469	43.4907	23	24	23	1	699	78.8	7.11	High		1.947	502	23
TRUE	High	Master Protein	Q05639	Elongation factor 1-alpha 2 OS=Homo sapiens GN=EEF1A2 PE=1 SV=1	0	83.285	44.7084	17	49	4	1	463	50.4	9.03	High		8.12	1073	17
TRUE	High	Master Protein	P40227	T-complex protein 1 subunit zeta OS=Homo sapiens GN=CCT6A PE=1 SV=3	0	82.906	41.4313	17	25	17	1	531	58	6.68	High		4.52	493	17
TRUE	High	Master Protein	P15880	40S ribosomal protein S2 OS=Homo sapiens GN=RPS2 PE=1 SV=2	0	82.004	53.2423	15	38	15	1	293	31.3	10.24	High		8.006	902	15
TRUE	High	Master Protein	P26641	Elongation factor 1-gamma OS=Homo sapiens GN=EEF1G PE=1 SV=3	0	80.727	37.0709	16	35	16	1	437	50.1	6.67	High		5.629	741	16
TRUE	High	Master Protein	Q13423	NAD(P) transhydrogenase, mitochondrial OS=Homo sapiens GN=NNT PE=1 SV=3	0	80.681	23.849	21	34	21	1	1086	113.8	8.09	High		1.894	635	21
TRUE	High	Master Protein	O00410	Importin-5 OS=Homo sapiens GN=IPO5 PE=1 SV=4	0	80.256	29.9909	23	26	23	1	1097	123.6	4.94	High		1.326	421	23
TRUE	High	Master Protein	O43852	Calumenin OS=Homo sapiens GN=CALU PE=1 SV=2	0	79.983	46.3492	13	22	13	1	315	37.1	4.64	High		9	412	13
TRUE	High	Master Protein	P33991	DNA replication licensing factor MCM4 OS=Homo sapiens GN=MCM4 PE=1 SV=5	0	79.718	26.7671	18	24	18	1	863	96.5	6.74	High		1.581	554	18
TRUE	High	Master Protein	O43175	D-3-phosphoglycerate dehydrogenase OS=Homo sapiens GN=PHGDH PE=1 SV=4	0	78.094	33.0206	15	29	15	1	533	56.6	6.71	High		3.924	702	15
TRUE	High	Master Protein	P48047	ATP synthase subunit O, mitochondrial OS=Homo sapiens GN=ATP5O PE=1 SV=1	0	78.002	67.6056	13	25	13	1	213	23.3	9.96	High		15.379	720	13
TRUE	High	Master Protein	P25205	DNA replication licensing factor MCM3 OS=Homo sapiens GN=MCM3 PE=1 SV=3	0	77.902	30.0743	18	20	18	1	808	90.9	5.77	High		1.243	428	18
TRUE	High	Master Protein	P08708	40S ribosomal protein S17 OS=Homo sapiens GN=RPS17 PE=1 SV=2	0	77.675	65.9259	11	22	11	1	135	15.5	9.85	High		680.292	578	11
TRUE	High	Master Protein	P49368	T-complex protein 1 subunit gamma OS=Homo sapiens GN=CCT3 PE=1 SV=4	0	77.576	44.0367	18	25	18	1	545	60.5	6.49	High		2.36	483	18
TRUE	High	Master Protein	P10412	Histone H1.4 OS=Homo sapiens GN=HIST1H1E PE=1 SV=2	0	77.297	26.484	10	25	6	1	219	21.9	11.03	High		13.678	776	10
TRUE	High	Master Protein	Q04695	Keratin, type I cytoskeletal 17 OS=Homo sapiens GN=KRT17 PE=1 SV=2	0	76.696	40.5093	20	31	9	1	432	48.1	5.02	High		4.179	543	20
TRUE	High	Master Protein	Q14C86	GTPase-activating protein and VPS9 domain-containing protein 1 OS=Homo sapiens GN=GAPVD1 PE=1 SV=2	0	76.677	17.253	21	24	21	1	1478	164.9	5.22	High		0.83	487	21
TRUE	High	Master Protein	P67936	Tropomyosin alpha-4 chain OS=Homo sapiens GN=TPM4 PE=1 SV=3	0	75.555	62.0968	19	25	10	1	248	28.5	4.69	High		9	350	19
TRUE	High	Master Protein	P53618	Coatomer subunit beta OS=Homo sapiens GN=COPB1 PE=1 SV=3	0	75.513	26.7576	19	25	19	1	953	107.1	6.05	High		1.532	358	19
TRUE	High	Master Protein	P12235	ADP/ATP translocase 1 OS=Homo sapiens GN=SLC25A4 PE=1 SV=4	0	74.437	43.2886	15	29	1	1	298	33	9.76	High		7.962	545	15
TRUE	High	Master Protein	P14625	Endoplasmin OS=Homo sapiens GN=HSP90B1 PE=1 SV=1	0	72.714	25.5293	18	22	16	1	803	92.4	4.84	High		1.358	412	18
TRUE	High	Master Protein	P05787	Keratin, type II cytoskeletal 8 OS=Homo sapiens GN=KRT8 PE=1 SV=7	0	72.553	31.0559	20	51	12	1	483	53.7	5.59	High		4.817	837	20
TRUE	High	Master Protein	P62081	40S ribosomal protein S7 OS=Homo sapiens GN=RPS7 PE=1 SV=1	0	72.405	58.7629	13	27	13	1	194	22.1	10.1	High		52.367	447	13
TRUE	High	Master Protein	P30041	Peroxiredoxin-6 OS=Homo sapiens GN=PRDX6 PE=1 SV=3	0	70.209	68.75	14	22	14	1	224	25	6.38	High		10.548	570	14
TRUE	High	Master Protein	P22695	Cytochrome b-c1 complex subunit 2, mitochondrial OS=Homo sapiens GN=UQCRC2 PE=1 SV=3	0	70.138	36.4238	12	18	12	1	453	48.4	8.63	High		3.365	464	12
TRUE	High	Master Protein	P62826	GTP-binding nuclear protein Ran OS=Homo sapiens GN=RAN PE=1 SV=3	0	70.064	48.1481	14	26	14	1	216	24.4	7.49	High		34.112	487	14
TRUE	High	Master Protein	P48643	T-complex protein 1 subunit epsilon OS=Homo sapiens GN=CCT5 PE=1 SV=1	0	70.028	37.8928	15	20	14	1	541	59.6	5.66	High		2.162	399	15
TRUE	High	Master Protein	Q02878	60S ribosomal protein L6 OS=Homo sapiens GN=RPL6 PE=1 SV=3	0	69.839	45.4861	15	28	15	1	288	32.7	10.58	High		9	529	15
TRUE	High	Master Protein	P62906	60S ribosomal protein L10a OS=Homo sapiens GN=RPL10A PE=1 SV=2	0	69.695	45.6221	9	29	9	1	217	24.8	9.94	High		12.594	490	9
TRUE	High	Master Protein	P21291	Cysteine and glycine-rich protein 1 OS=Homo sapiens GN=CSRP1 PE=1 SV=3	0	69.683	64.7668	10	21	10	1	193	20.6	8.57	High		10.788	474	10
TRUE	High	Master Protein	P54886	Delta-1-pyrroline-5-carboxylate synthase OS=Homo sapiens GN=ALDH18A1 PE=1 SV=2	0	69.277	25.283	15	19	15	1	795	87.2	7.12	High		1.291	406	15
TRUE	High	Master Protein	P60660	Myosin light polypeptide 6 OS=Homo sapiens GN=MYL6 PE=1 SV=2	0	68.529	61.5894	8	29	6	1	151	16.9	4.65	High		22.101	823	8
TRUE	High	Master Protein	P27708	CAD protein OS=Homo sapiens GN=CAD PE=1 SV=3	0	68.518	13.9326	23	25	22	1	2225	242.8	6.46	High		0.597	396	23
TRUE	High	Master Protein	O95297	Myelin protein zero-like protein 1 OS=Homo sapiens GN=MPZL1 PE=1 SV=1	0	68.074	41.6357	12	33	12	1	269	29.1	8.72	High	Phospho [S210(100)]	23.245	892	12
TRUE	High	Master Protein	P49327	Fatty acid synthase OS=Homo sapiens GN=FASN PE=1 SV=3	0	67.859	12.266	21	22	21	1	2511	273.3	6.44	High		0.444	356	21
TRUE	High	Master Protein	P05023	Sodium/potassium-transporting ATPase subunit alpha-1 OS=Homo sapiens GN=ATP1A1 PE=1 SV=1	0	67.837	21.8964	19	24	19	1	1023	112.8	5.49	High		1.649	485	19
TRUE	High	Master Protein	P00558	Phosphoglycerate kinase 1 OS=Homo sapiens GN=PGK1 PE=1 SV=3	0	67.067	44.8441	13	21	13	1	417	44.6	8.1	High		2.162	425	13
TRUE	High	Master Protein	B9A064	Immunoglobulin lambda-like polypeptide 5 OS=Homo sapiens GN=IGLL5 PE=2 SV=2	0	66.871	46.2617	8	72	4	1	214	23	8.84	High		9	1571	8
TRUE	High	Master Protein	P62917	60S ribosomal protein L8 OS=Homo sapiens GN=RPL8 PE=1 SV=2	0	66.868	47.0817	10	18	10	1	257	28	11.03	High		9	371	10
TRUE	High	Master Protein	O95373	Importin-7 OS=Homo sapiens GN=IPO7 PE=1 SV=1	0	66.634	16.9557	15	22	14	1	1038	119.4	4.82	High		1.33	413	15
TRUE	High	Master Protein	P06493	Cyclin-dependent kinase 1 OS=Homo sapiens GN=CDK1 PE=1 SV=3	0	66.163	49.4949	12	24	10	1	297	34.1	8.4	High		6.197	519	12
TRUE	High	Master Protein	P41252	Isoleucine--tRNA ligase, cytoplasmic OS=Homo sapiens GN=IARS PE=1 SV=2	0	65.975	21.1569	19	22	19	1	1262	144.4	6.15	High		1.036	370	19
TRUE	High	Master Protein	P61221	ATP-binding cassette sub-family E member 1 OS=Homo sapiens GN=ABCE1 PE=1 SV=1	0	65.387	34.7245	16	22	16	1	599	67.3	8.34	High		2.162	428	16
TRUE	High	Master Protein	P50416	Carnitine O-palmitoyltransferase 1, liver isoform OS=Homo sapiens GN=CPT1A PE=1 SV=2	0	64.721	26.3907	19	28	19	1	773	88.3	8.65	High		1.721	583	19
TRUE	High	Master Protein	P62424	60S ribosomal protein L7a OS=Homo sapiens GN=RPL7A PE=1 SV=2	0	64.459	56.391	15	27	15	1	266	30	10.61	High		14.849	549	15
TRUE	High	Master Protein	Q86YZ3	Hornerin OS=Homo sapiens GN=HRNR PE=1 SV=2	0	64.041	13.6842	11	16	11	1	2850	282.2	10.04	High		0.366	347	11
TRUE	High	Master Protein	P0DOY2	Immunoglobulin lambda constant 2 OS=Homo sapiens GN=IGLC2 PE=1 SV=1	0	64.014	79.2453	7	77	2	1	106	11.3	7.24	High		36.276	1791	7
TRUE	High	Master Protein	P18124	60S ribosomal protein L7 OS=Homo sapiens GN=RPL7 PE=1 SV=1	0	63.959	50	17	30	17	1	248	29.2	10.65	High		26.384	529	17
TRUE	High	Master Protein	Q16531	DNA damage-binding protein 1 OS=Homo sapiens GN=DDB1 PE=1 SV=1	0	63.932	17.193	13	14	13	1	1140	126.9	5.26	High		0.696	342	13
TRUE	High	Master Protein	P49588	Alanine--tRNA ligase, cytoplasmic OS=Homo sapiens GN=AARS PE=1 SV=2	0	62.96	20.5579	17	21	17	1	968	106.7	5.53	High		1.043	435	17
TRUE	High	Master Protein	Q9UJS0	Calcium-binding mitochondrial carrier protein Aralar2 OS=Homo sapiens GN=SLC25A13 PE=1 SV=2	0	62.831	30.3704	15	18	15	1	675	74.1	8.62	High		1.637	329	15
TRUE	High	Master Protein	Q9UNF1	Melanoma-associated antigen D2 OS=Homo sapiens GN=MAGED2 PE=1 SV=2	0	62.4	25.4125	12	22	12	1	606	64.9	9.32	High		1.865	549	12
TRUE	High	Master Protein	P04843	Dolichyl-diphosphooligosaccharide--protein glycosyltransferase subunit 1 OS=Homo sapiens GN=RPN1 PE=1 SV=1	0	62.36	33.2784	15	20	15	1	607	68.5	6.38	High		1.456	373	15
TRUE	High	Master Protein	P17858	ATP-dependent 6-phosphofructokinase, liver type OS=Homo sapiens GN=PFKL PE=1 SV=6	0	62.109	20.8974	11	17	9	1	780	85	7.5	High		0.945	385	11
TRUE	High	Master Protein	P56192	Methionine--tRNA ligase, cytoplasmic OS=Homo sapiens GN=MARS PE=1 SV=2	0	61.963	24.8889	16	18	16	1	900	101.1	6.16	High		1.228	297	16
TRUE	High	Master Protein	P09874	Poly [ADP-ribose] polymerase 1 OS=Homo sapiens GN=PARP1 PE=1 SV=4	0	61.85	21.1045	15	20	15	1	1014	113	8.88	High		0.931	415	15
TRUE	High	Master Protein	Q13263	Transcription intermediary factor 1-beta OS=Homo sapiens GN=TRIM28 PE=1 SV=5	0	61.794	18.5629	12	18	12	1	835	88.5	5.77	High		1.195	560	12
TRUE	High	Master Protein	Q15149	Plectin OS=Homo sapiens GN=PLEC PE=1 SV=3	0	61.683	5.46541	24	25	23	1	4684	531.5	5.96	High		0.182	323	24
TRUE	High	Master Protein	O76013	Keratin, type I cuticular Ha6 OS=Homo sapiens GN=KRT36 PE=2 SV=1	0	61.652	17.1306	10	34	4	1	467	52.2	4.94	High		2.275	717	10
TRUE	High	Master Protein	P42704	Leucine-rich PPR motif-containing protein, mitochondrial OS=Homo sapiens GN=LRPPRC PE=1 SV=3	0	60.735	17.4319	22	22	22	1	1394	157.8	6.13	High		0.643	282	22
TRUE	High	Master Protein	Q9P2J5	Leucine--tRNA ligase, cytoplasmic OS=Homo sapiens GN=LARS PE=1 SV=2	0	60.466	16.7517	17	20	17	1	1176	134.4	7.3	High		0.981	352	17
TRUE	High	Master Protein	P62753	40S ribosomal protein S6 OS=Homo sapiens GN=RPS6 PE=1 SV=1	0	60.182	36.1446	13	25	13	1	249	28.7	10.84	High		19.309	629	13
TRUE	High	Master Protein	P08729	Keratin, type II cytoskeletal 7 OS=Homo sapiens GN=KRT7 PE=1 SV=5	0	60.093	28.3582	16	43	9	1	469	51.4	5.48	High		2.06	913	16
TRUE	High	Master Protein	P62241	40S ribosomal protein S8 OS=Homo sapiens GN=RPS8 PE=1 SV=2	0	59.979	54.8077	10	24	10	1	208	24.2	10.32	High		24.119	649	10
TRUE	High	Master Protein	P48444	Coatomer subunit delta OS=Homo sapiens GN=ARCN1 PE=1 SV=1	0	59.934	36.2035	14	21	14	1	511	57.2	6.21	High		2.981	340	14
TRUE	High	Master Protein	P62244	40S ribosomal protein S15a OS=Homo sapiens GN=RPS15A PE=1 SV=2	0	59.896	67.6923	9	19	9	1	130	14.8	10.13	High		17.738	522	9
TRUE	High	Master Protein	P14868	Aspartate--tRNA ligase, cytoplasmic OS=Homo sapiens GN=DARS PE=1 SV=2	0	59.689	33.7325	16	22	16	1	501	57.1	6.55	High		1.985	365	16
TRUE	High	Master Protein	P62269	40S ribosomal protein S18 OS=Homo sapiens GN=RPS18 PE=1 SV=3	0	59.129	57.2368	15	29	15	1	152	17.7	10.99	High		37.312	663	15
TRUE	High	Master Protein	P62263	40S ribosomal protein S14 OS=Homo sapiens GN=RPS14 PE=1 SV=3	0	57.547	43.0464	10	24	10	1	151	16.3	10.05	High		99	501	10
TRUE	High	Master Protein	Q14498	RNA-binding protein 39 OS=Homo sapiens GN=RBM39 PE=1 SV=2	0	57.358	21.6981	9	14	9	1	530	59.3	10.1	High		1.276	476	9
TRUE	High	Master Protein	P04844	Dolichyl-diphosphooligosaccharide--protein glycosyltransferase subunit 2 OS=Homo sapiens GN=RPN2 PE=1 SV=3	0	57.292	24.7227	11	14	11	1	631	69.2	5.69	High		1.438	373	11
TRUE	High	Master Protein	Q02539	Histone H1.1 OS=Homo sapiens GN=HIST1H1A PE=1 SV=3	0	56.802	16.7442	5	12	1	1	215	21.8	10.99	High		5.579	406	5
TRUE	High	Master Protein	P13804	Electron transfer flavoprotein subunit alpha, mitochondrial OS=Homo sapiens GN=ETFA PE=1 SV=1	0	56.755	50.1502	12	17	12	1	333	35.1	8.38	High		2.675	421	12
TRUE	High	Master Protein	O75531	Barrier-to-autointegration factor OS=Homo sapiens GN=BANF1 PE=1 SV=1	0	56.706	65.1685	9	19	9	1	89	10.1	6.09	High		99	375	9
TRUE	High	Master Protein	P33992	DNA replication licensing factor MCM5 OS=Homo sapiens GN=MCM5 PE=1 SV=5	0	56.606	26.703	16	20	16	1	734	82.2	8.37	High		1.154	384	16
TRUE	High	Master Protein	P06753	Tropomyosin alpha-3 chain OS=Homo sapiens GN=TPM3 PE=1 SV=2	0	56.392	32.9825	13	18	4	1	285	32.9	4.72	High		3.217	275	13
TRUE	High	Master Protein	P32969	60S ribosomal protein L9 OS=Homo sapiens GN=RPL9 PE=1 SV=1	0	56.119	45.3125	9	17	9	1	192	21.9	9.95	High		14.199	353	9
TRUE	High	Master Protein	O00571	ATP-dependent RNA helicase DDX3X OS=Homo sapiens GN=DDX3X PE=1 SV=3	0	55.415	28.0967	15	18	15	1	662	73.2	7.18	High		1.404	382	15
TRUE	High	Master Protein	Q99714	3-hydroxyacyl-CoA dehydrogenase type-2 OS=Homo sapiens GN=HSD17B10 PE=1 SV=3	0	54.917	67.8161	11	16	11	1	261	26.9	7.78	High		5.494	483	11
TRUE	High	Master Protein	P18085	ADP-ribosylation factor 4 OS=Homo sapiens GN=ARF4 PE=1 SV=3	0	54.718	65	10	15	6	1	180	20.5	7.14	High		7.377	307	10
TRUE	High	Master Protein	O95573	Long-chain-fatty-acid--CoA ligase 3 OS=Homo sapiens GN=ACSL3 PE=1 SV=3	0	54.307	24.8611	13	15	12	1	720	80.4	8.38	High		1.371	293	13
TRUE	High	Master Protein	Q9Y6N5	Sulfide:quinone oxidoreductase, mitochondrial OS=Homo sapiens GN=SQRDL PE=1 SV=1	0	54.306	47.1111	15	19	15	1	450	49.9	9.11	High		1.762	425	15
TRUE	High	Master Protein	P04075	Fructose-bisphosphate aldolase A OS=Homo sapiens GN=ALDOA PE=1 SV=2	0	54.193	50	12	16	10	1	364	39.4	8.09	High		2.675	366	12
TRUE	High	Master Protein	P14923	Junction plakoglobin OS=Homo sapiens GN=JUP PE=1 SV=3	0	53.94	21.0738	13	18	13	1	745	81.7	6.14	High		1.434	289	13
TRUE	High	Master Protein	P39748	Flap endonuclease 1 OS=Homo sapiens GN=FEN1 PE=1 SV=1	0	53.497	32.8947	10	14	10	1	380	42.6	8.62	High		1.873	363	10
TRUE	High	Master Protein	P50402	Emerin OS=Homo sapiens GN=EMD PE=1 SV=1	0	53.444	46.8504	10	17	10	1	254	29	5.5	High		9	246	10
TRUE	High	Master Protein	Q9Y383	Putative RNA-binding protein Luc7-like 2 OS=Homo sapiens GN=LUC7L2 PE=1 SV=2	0	52.631	41.0714	13	19	13	1	392	46.5	10.01	High		5.952	356	13
TRUE	High	Master Protein	O75694	Nuclear pore complex protein Nup155 OS=Homo sapiens GN=NUP155 PE=1 SV=1	0	52.309	13.4436	12	15	12	1	1391	155.1	6.16	High		0.63	322	12
TRUE	High	Master Protein	P55786	Puromycin-sensitive aminopeptidase OS=Homo sapiens GN=NPEPPS PE=1 SV=2	0	52.049	20.6746	14	17	14	1	919	103.2	5.72	High		0.833	305	14
TRUE	High	Master Protein	P31689	DnaJ homolog subfamily A member 1 OS=Homo sapiens GN=DNAJA1 PE=1 SV=2	0	51.316	49.6222	13	18	13	1	397	44.8	7.08	High		4.926	238	13
TRUE	High	Master Protein	O94925	Glutaminase kidney isoform, mitochondrial OS=Homo sapiens GN=GLS PE=1 SV=1	0	51.249	26.1584	11	13	11	1	669	73.4	7.77	High		0.828	283	11
TRUE	High	Master Protein	Q5T4S7	E3 ubiquitin-protein ligase UBR4 OS=Homo sapiens GN=UBR4 PE=1 SV=1	0	51.208	5.22863	17	18	17	1	5183	573.5	6.04	High		0.151	296	17
TRUE	High	Master Protein	P27635	60S ribosomal protein L10 OS=Homo sapiens GN=RPL10 PE=1 SV=4	0	50.386	43.4579	9	22	9	1	214	24.6	10.08	High		13.251	393	9
TRUE	High	Master Protein	Q14566	DNA replication licensing factor MCM6 OS=Homo sapiens GN=MCM6 PE=1 SV=1	0	50.206	22.6553	15	17	15	1	821	92.8	5.41	High		0.833	388	15
TRUE	High	Master Protein	P62937	Peptidyl-prolyl cis-trans isomerase A OS=Homo sapiens GN=PPIA PE=1 SV=2	0	50.092	54.5455	9	19	9	1	165	18	7.81	High		7.483	443	9
TRUE	High	Master Protein	P49736	DNA replication licensing factor MCM2 OS=Homo sapiens GN=MCM2 PE=1 SV=4	0	49.627	19.8009	12	20	12	1	904	101.8	5.52	High		0.943	310	12
TRUE	High	Master Protein	P18621	60S ribosomal protein L17 OS=Homo sapiens GN=RPL17 PE=1 SV=3	0	49.294	40.2174	9	21	9	1	184	21.4	10.17	High		17.738	248	9
TRUE	High	Master Protein	P22102	Trifunctional purine biosynthetic protein adenosine-3 OS=Homo sapiens GN=GART PE=1 SV=1	0	48.588	18.9109	14	14	14	1	1010	107.7	6.7	High		0.711	272	14
TRUE	High	Master Protein	P43246	DNA mismatch repair protein Msh2 OS=Homo sapiens GN=MSH2 PE=1 SV=1	0	48.21	17.0236	13	14	13	1	934	104.7	5.77	High		0.759	295	13
TRUE	High	Master Protein	P20042	Eukaryotic translation initiation factor 2 subunit 2 OS=Homo sapiens GN=EIF2S2 PE=1 SV=2	0	47.025	33.3333	11	15	11	1	333	38.4	5.8	High		3.329	253	11
TRUE	High	Master Protein	P62750	60S ribosomal protein L23a OS=Homo sapiens GN=RPL23A PE=1 SV=1	0	46.898	50.641	9	17	9	1	156	17.7	10.45	High		26.826	437	9
TRUE	High	Master Protein	Q86VP6	Cullin-associated NEDD8-dissociated protein 1 OS=Homo sapiens GN=CAND1 PE=1 SV=2	0	46.495	13.7398	14	14	14	1	1230	136.3	5.78	High		0.565	304	14
TRUE	High	Master Protein	P47897	Glutamine--tRNA ligase OS=Homo sapiens GN=QARS PE=1 SV=1	0	46.37	19.7419	11	11	11	1	775	87.7	7.15	High		0.643	312	11
TRUE	High	Master Protein	P62888	60S ribosomal protein L30 OS=Homo sapiens GN=RPL30 PE=1 SV=2	0	46.116	59.1304	7	14	7	1	115	12.8	9.63	High		16.783	363	7
TRUE	High	Master Protein	Q96AG4	Leucine-rich repeat-containing protein 59 OS=Homo sapiens GN=LRRC59 PE=1 SV=1	0	45.729	45.9283	10	12	10	1	307	34.9	9.57	High		2.594	371	10
TRUE	High	Master Protein	P23528	Cofilin-1 OS=Homo sapiens GN=CFL1 PE=1 SV=3	0	45.694	62.0482	8	13	8	1	166	18.5	8.09	High		5.813	282	8
TRUE	High	Master Protein	P50454	Serpin H1 OS=Homo sapiens GN=SERPINH1 PE=1 SV=2	0	45.635	26.7943	9	13	9	1	418	46.4	8.69	High		1.754	278	9
TRUE	High	Master Protein	O60814	Histone H2B type 1-K OS=Homo sapiens GN=HIST1H2BK PE=1 SV=3	0	45.553	41.2698	6	23	6	1	126	13.9	10.32	High		9	798	6
TRUE	High	Master Protein	P17812	CTP synthase 1 OS=Homo sapiens GN=CTPS1 PE=1 SV=2	0	45.399	23.8579	13	18	12	1	591	66.6	6.46	High		1.683	282	13
TRUE	High	Master Protein	Q14847	LIM and SH3 domain protein 1 OS=Homo sapiens GN=LASP1 PE=1 SV=2	0	45.213	44.4444	11	18	11	1	261	29.7	7.05	High		6.743	171	11
TRUE	High	Master Protein	P61204	ADP-ribosylation factor 3 OS=Homo sapiens GN=ARF3 PE=1 SV=2	0	45.185	55.2486	9	16	4	1	181	20.6	7.43	High		7.254	175	9
TRUE	High	Master Protein	P31943	Heterogeneous nuclear ribonucleoprotein H OS=Homo sapiens GN=HNRNPH1 PE=1 SV=4	0	44.734	30.0668	9	10	8	1	449	49.2	6.3	High		1.512	256	9
TRUE	High	Master Protein	P46782	40S ribosomal protein S5 OS=Homo sapiens GN=RPS5 PE=1 SV=4	0	44.477	35.2941	7	19	7	1	204	22.9	9.72	High		18.953	582	7
TRUE	High	Master Protein	Q07020	60S ribosomal protein L18 OS=Homo sapiens GN=RPL18 PE=1 SV=2	0	44.421	45.7447	9	20	9	1	188	21.6	11.72	High		20.544	543	9
TRUE	High	Master Protein	Q12965	Unconventional myosin-Ie OS=Homo sapiens GN=MYO1E PE=1 SV=2	0	44.413	16.5162	14	15	14	1	1108	127	8.92	High		0.674	234	14
TRUE	High	Master Protein	P39019	40S ribosomal protein S19 OS=Homo sapiens GN=RPS19 PE=1 SV=2	0	44.13	50.3448	11	29	11	1	145	16.1	10.32	High		13.678	528	11
TRUE	High	Master Protein	P13929	Beta-enolase OS=Homo sapiens GN=ENO3 PE=1 SV=5	0	43.892	19.8157	6	14	2	1	434	47	7.71	High		1.043	515	6
TRUE	High	Master Protein	Q04637	Eukaryotic translation initiation factor 4 gamma 1 OS=Homo sapiens GN=EIF4G1 PE=1 SV=4	0	43.727	14.7592	18	19	18	1	1599	175.4	5.33	High		0.713	194	18
TRUE	High	Master Protein	P43490	Nicotinamide phosphoribosyltransferase OS=Homo sapiens GN=NAMPT PE=1 SV=1	0	43.708	30.3462	10	14	10	1	491	55.5	7.15	High		1.712	228	10
TRUE	High	Master Protein	Q8NE71	ATP-binding cassette sub-family F member 1 OS=Homo sapiens GN=ABCF1 PE=1 SV=2	0	43.535	20	13	13	13	1	845	95.9	6.8	High		0.891	199	13
TRUE	High	Master Protein	P67775	Serine/threonine-protein phosphatase 2A catalytic subunit alpha isoform OS=Homo sapiens GN=PPP2CA PE=1 SV=1	0	43.137	46.2783	8	9	1	1	309	35.6	5.54	High		1.976	223	8
TRUE	High	Master Protein	Q15293	Reticulocalbin-1 OS=Homo sapiens GN=RCN1 PE=1 SV=1	0	42.963	40.7855	8	12	8	1	331	38.9	5	High		3.217	193	8
TRUE	High	Master Protein	Q92499	ATP-dependent RNA helicase DDX1 OS=Homo sapiens GN=DDX1 PE=1 SV=2	0	42.632	29.5946	13	13	13	1	740	82.4	7.23	High		0.891	149	13
TRUE	High	Master Protein	P61313	60S ribosomal protein L15 OS=Homo sapiens GN=RPL15 PE=1 SV=2	0	42.052	45.5882	10	17	10	1	204	24.1	11.62	High		6.197	364	10
TRUE	High	Master Protein	Q00341	Vigilin OS=Homo sapiens GN=HDLBP PE=1 SV=2	0	41.877	12.5394	13	14	13	1	1268	141.4	6.87	High		0.447	253	13
TRUE	High	Master Protein	P62277	40S ribosomal protein S13 OS=Homo sapiens GN=RPS13 PE=1 SV=2	0	41.678	40.3974	9	19	9	1	151	17.2	10.54	High		11.328	407	9
TRUE	High	Master Protein	Q7KZF4	Staphylococcal nuclease domain-containing protein 1 OS=Homo sapiens GN=SND1 PE=1 SV=1	0	41.497	17.3626	13	13	13	1	910	101.9	7.17	High		0.647	224	13
TRUE	High	Master Protein	P62280	40S ribosomal protein S11 OS=Homo sapiens GN=RPS11 PE=1 SV=3	0	41.228	47.4684	11	23	11	1	158	18.4	10.3	High		30.623	368	11
TRUE	High	Master Protein	P62829	60S ribosomal protein L23 OS=Homo sapiens GN=RPL23 PE=1 SV=1	0	41.141	69.2857	9	16	9	1	140	14.9	10.51	High		9	410	9
TRUE	High	Master Protein	P62633	Cellular nucleic acid-binding protein OS=Homo sapiens GN=CNBP PE=1 SV=1	0	41.088	48.5876	7	12	7	1	177	19.5	7.71	High		2.981	278	7
TRUE	High	Master Protein	P46781	40S ribosomal protein S9 OS=Homo sapiens GN=RPS9 PE=1 SV=3	0	40.965	45.8763	15	29	15	1	194	22.6	10.65	High		21.758	374	15
TRUE	High	Master Protein	Q9H9B4	Sideroflexin-1 OS=Homo sapiens GN=SFXN1 PE=1 SV=4	0	40.156	30.1242	9	11	9	1	322	35.6	9.07	High		2.162	290	9
TRUE	High	Master Protein	P53999	Activated RNA polymerase II transcriptional coactivator p15 OS=Homo sapiens GN=SUB1 PE=1 SV=3	0	40.117	63.7795	9	12	9	1	127	14.4	9.6	High		11.589	237	9
TRUE	High	Master Protein	P07355	Annexin A2 OS=Homo sapiens GN=ANXA2 PE=1 SV=2	0	39.615	28.6136	7	12	7	1	339	38.6	7.75	High		1.61	300	7
TRUE	High	Master Protein	Q96QK1	Vacuolar protein sorting-associated protein 35 OS=Homo sapiens GN=VPS35 PE=1 SV=2	0	39.604	18.9698	11	13	11	1	796	91.6	5.49	High		0.82	191	11
TRUE	High	Master Protein	O14579	Coatomer subunit epsilon OS=Homo sapiens GN=COPE PE=1 SV=3	0	39.475	40.5844	8	9	8	1	308	34.5	5.12	High		1.976	274	8
TRUE	High	Master Protein	P46783	40S ribosomal protein S10 OS=Homo sapiens GN=RPS10 PE=1 SV=1	0	39.446	46.6667	7	21	6	1	165	18.9	10.15	High		4.878	407	7
TRUE	High	Master Protein	P62714	Serine/threonine-protein phosphatase 2A catalytic subunit beta isoform OS=Homo sapiens GN=PPP2CB PE=1 SV=1	0	39.439	44.6602	8	9	1	1	309	35.6	5.43	High		1.976	199	8
TRUE	High	Master Protein	P00338	L-lactate dehydrogenase A chain OS=Homo sapiens GN=LDHA PE=1 SV=2	0	39.35	44.8795	12	16	10	1	332	36.7	8.27	High		2.311	326	12
TRUE	High	Master Protein	Q9NSB4	Keratin, type II cuticular Hb2 OS=Homo sapiens GN=KRT82 PE=3 SV=3	0	39.299	9.94152	7	52	3	1	513	56.6	6.74	High		1.31	1100	7
TRUE	High	Master Protein	P38606	V-type proton ATPase catalytic subunit A OS=Homo sapiens GN=ATP6V1A PE=1 SV=2	0	39.259	27.3906	11	12	11	1	617	68.3	5.52	High		0.884	228	11
TRUE	High	Master Protein	P08865	40S ribosomal protein SA OS=Homo sapiens GN=RPSA PE=1 SV=4	0	38.839	41.0169	8	11	8	1	295	32.8	4.87	High		2.415	316	8
TRUE	High	Master Protein	P08240	Signal recognition particle receptor subunit alpha OS=Homo sapiens GN=SRPRA PE=1 SV=2	0	38.617	15.3605	9	9	9	1	638	69.8	8.95	High		0.658	242	9
TRUE	High	Master Protein	P62805	Histone H4 OS=Homo sapiens GN=HIST1H4A PE=1 SV=2	0	38.431	53.3981	8	18	8	1	103	11.4	11.36	High		67.129	477	8
TRUE	High	Master Protein	Q14697	Neutral alpha-glucosidase AB OS=Homo sapiens GN=GANAB PE=1 SV=3	0	38.43	15.3602	13	15	13	1	944	106.8	6.14	High		0.723	182	13
TRUE	High	Master Protein	Q6NUK1	Calcium-binding mitochondrial carrier protein SCaMC-1 OS=Homo sapiens GN=SLC25A24 PE=1 SV=2	0	38.094	31.8658	15	17	15	1	477	53.3	6.33	High		2.162	188	15
TRUE	High	Master Protein	Q969X5	Endoplasmic reticulum-Golgi intermediate compartment protein 1 OS=Homo sapiens GN=ERGIC1 PE=1 SV=1	0	37.99	44.4828	9	13	9	1	290	32.6	7.06	High		5.105	250	9
TRUE	High	Master Protein	P84085	ADP-ribosylation factor 5 OS=Homo sapiens GN=ARF5 PE=1 SV=2	0	37.983	35	6	12	1	1	180	20.5	6.79	High		3.125	163	6
TRUE	High	Master Protein	O60488	Long-chain-fatty-acid--CoA ligase 4 OS=Homo sapiens GN=ACSL4 PE=1 SV=2	0	37.945	17.5809	8	10	7	1	711	79.1	8.38	High		0.778	175	8
TRUE	High	Master Protein	Q05519	Serine/arginine-rich splicing factor 11 OS=Homo sapiens GN=SRSF11 PE=1 SV=1	0	37.744	18.3884	6	11	6	1	484	53.5	10.52	High		2.384	280	6
TRUE	High	Master Protein	Q70J99	Protein unc-13 homolog D OS=Homo sapiens GN=UNC13D PE=1 SV=1	0	37.216	7.15596	4	5	4	1	1090	123.2	6.65	High		0.22	185	4
TRUE	High	Master Protein	Q9Y224	UPF0568 protein C14orf166 OS=Homo sapiens GN=C14orf166 PE=1 SV=1	0	37.051	43.8525	7	7	7	1	244	28.1	6.65	High		1.448	261	7
TRUE	High	Master Protein	P0C0S8	Histone H2A type 1 OS=Homo sapiens GN=HIST1H2AG PE=1 SV=2	0	36.658	40.7692	7	16	2	1	130	14.1	10.9	High		18.307	336	7
TRUE	High	Master Protein	O43615	Mitochondrial import inner membrane translocase subunit TIM44 OS=Homo sapiens GN=TIMM44 PE=1 SV=2	0	36.43	23.4513	9	11	9	1	452	51.3	8.32	High		1.102	278	9
TRUE	High	Master Protein	Q5XKE5	Keratin, type II cytoskeletal 79 OS=Homo sapiens GN=KRT79 PE=1 SV=2	0	36.24	13.0841	10	22	1	1	535	57.8	7.2	High		1.154	339	10
TRUE	High	Master Protein	P62158	Calmodulin OS=Homo sapiens GN=CALM1 PE=1 SV=2	0	35.987	52.349	8	17	7	1	149	16.8	4.22	High		9	381	8
TRUE	High	Master Protein	P63173	60S ribosomal protein L38 OS=Homo sapiens GN=RPL38 PE=1 SV=2	0	35.91	50	5	11	5	1	70	8.2	10.1	High		463.159	251	5
TRUE	High	Master Protein	O43252	Bifunctional 3'-phosphoadenosine 5'-phosphosulfate synthase 1 OS=Homo sapiens GN=PAPSS1 PE=1 SV=2	0	35.792	22.1154	9	10	8	1	624	70.8	6.86	High		0.863	161	9
TRUE	High	Master Protein	O00429	Dynamin-1-like protein OS=Homo sapiens GN=DNM1L PE=1 SV=2	0	35.403	15.3533	9	9	9	1	736	81.8	6.81	High		0.49	212	9
TRUE	High	Master Protein	Q08J23	tRNA (cytosine(34)-C(5))-methyltransferase OS=Homo sapiens GN=NSUN2 PE=1 SV=2	0	35.181	17.2099	9	11	9	1	767	86.4	6.77	High		0.616	207	9
TRUE	High	Master Protein	P07737	Profilin-1 OS=Homo sapiens GN=PFN1 PE=1 SV=2	0	34.949	62.8571	8	13	8	1	140	15	8.27	High		15.681	251	8
TRUE	High	Master Protein	Q16576	Histone-binding protein RBBP7 OS=Homo sapiens GN=RBBP7 PE=1 SV=1	0	34.723	52.7059	11	15	8	1	425	47.8	5.05	High		2.981	183	11
TRUE	High	Master Protein	P41743	Protein kinase C iota type OS=Homo sapiens GN=PRKCI PE=1 SV=2	0	34.597	20.4698	7	8	7	1	596	68.2	5.85	High		0.931	142	7
TRUE	High	Master Protein	P49023	Paxillin OS=Homo sapiens GN=PXN PE=1 SV=3	0	34.446	28.934	12	12	12	1	591	64.5	6.19	High		1.371	148	12
TRUE	High	Master Protein	P61981	14-3-3 protein gamma OS=Homo sapiens GN=YWHAG PE=1 SV=2	0	34.374	38.8664	9	12	5	1	247	28.3	4.89	High		2.594	229	9
TRUE	High	Master Protein	P22061	Protein-L-isoaspartate(D-aspartate) O-methyltransferase OS=Homo sapiens GN=PCMT1 PE=1 SV=4	0	34.324	50.6608	7	9	7	1	227	24.6	7.21	High		3.125	186	7
TRUE	High	Master Protein	P08670	Vimentin OS=Homo sapiens GN=VIM PE=1 SV=4	0	34.248	22.5322	10	16	7	1	466	53.6	5.12	High		1.254	222	10
TRUE	High	Master Protein	P24941	Cyclin-dependent kinase 2 OS=Homo sapiens GN=CDK2 PE=1 SV=2	0	34.137	49.6644	11	13	9	1	298	33.9	8.68	High		2.34	186	11
TRUE	High	Master Protein	O60841	Eukaryotic translation initiation factor 5B OS=Homo sapiens GN=EIF5B PE=1 SV=4	0	34.024	11.9672	10	12	10	1	1220	138.7	5.49	High		0.505	168	10
TRUE	High	Master Protein	P49257	Protein ERGIC-53 OS=Homo sapiens GN=LMAN1 PE=1 SV=2	0	33.975	22.1569	10	13	10	1	510	57.5	6.77	High		1.395	217	10
TRUE	High	Master Protein	Q00325	Phosphate carrier protein, mitochondrial OS=Homo sapiens GN=SLC25A3 PE=1 SV=2	0	33.971	23.7569	11	18	11	1	362	40.1	9.38	High		3.16	339	11
TRUE	High	Master Protein	Q14974	Importin subunit beta-1 OS=Homo sapiens GN=KPNB1 PE=1 SV=2	0	33.695	11.4155	7	10	7	1	876	97.1	4.78	High		0.602	144	7
TRUE	High	Master Protein	P52272	Heterogeneous nuclear ribonucleoprotein M OS=Homo sapiens GN=HNRNPM PE=1 SV=3	0	33.594	16.4384	10	11	10	1	730	77.5	8.7	High		0.585	212	10
TRUE	High	Master Protein	Q9Y3I0	tRNA-splicing ligase RtcB homolog OS=Homo sapiens GN=RTCB PE=1 SV=1	0	33.211	32.8713	10	10	10	1	505	55.2	7.23	High		1.154	163	10
TRUE	High	Master Protein	Q9Y6C9	Mitochondrial carrier homolog 2 OS=Homo sapiens GN=MTCH2 PE=1 SV=1	0	33.023	31.6832	8	13	8	1	303	33.3	7.97	High		3.217	200	8
TRUE	High	Master Protein	P46776	60S ribosomal protein L27a OS=Homo sapiens GN=RPL27A PE=1 SV=2	0	32.957	31.0811	6	11	6	1	148	16.6	11	High		9	266	6
TRUE	High	Master Protein	P55809	Succinyl-CoA:3-ketoacid coenzyme A transferase 1, mitochondrial OS=Homo sapiens GN=OXCT1 PE=1 SV=1	0	32.884	17.8846	6	7	6	1	520	56.1	7.46	High		0.743	244	6
TRUE	High	Master Protein	Q15645	Pachytene checkpoint protein 2 homolog OS=Homo sapiens GN=TRIP13 PE=1 SV=2	0	32.882	20.6019	7	8	7	1	432	48.5	6.09	High		1.089	151	7
TRUE	High	Master Protein	P01891	HLA class I histocompatibility antigen, A-68 alpha chain OS=Homo sapiens GN=HLA-A PE=1 SV=4	0	32.846	30.9589	8	10	4	1	365	40.9	6.7	High		1.31	164	8
TRUE	High	Master Protein	O75396	Vesicle-trafficking protein SEC22b OS=Homo sapiens GN=SEC22B PE=1 SV=4	0	32.81	39.0698	8	11	8	1	215	24.6	6.92	High		3.394	272	8
TRUE	High	Master Protein	Q8NE86	Calcium uniporter protein, mitochondrial OS=Homo sapiens GN=MCU PE=1 SV=1	0	32.715	20.7977	6	8	6	1	351	39.8	8.65	High		1.336	200	6
TRUE	High	Master Protein	Q02543	60S ribosomal protein L18a OS=Homo sapiens GN=RPL18A PE=1 SV=2	0	32.708	39.7727	9	17	9	1	176	20.7	10.71	High		5.105	288	9
TRUE	High	Master Protein	P35637	RNA-binding protein FUS OS=Homo sapiens GN=FUS PE=1 SV=1	0	32.605	16.9202	6	9	6	1	526	53.4	9.36	High		1.783	147	6
TRUE	High	Master Protein	Q93077	Histone H2A type 1-C OS=Homo sapiens GN=HIST1H2AC PE=1 SV=3	0	32.542	40.7692	6	14	1	1	130	14.1	11.05	High		12.895	256	6
TRUE	High	Master Protein	P21266	Glutathione S-transferase Mu 3 OS=Homo sapiens GN=GSTM3 PE=1 SV=3	0	32.513	34.2222	10	12	9	1	225	26.5	5.54	High		2.793	157	10
TRUE	High	Master Protein	Q7L014	Probable ATP-dependent RNA helicase DDX46 OS=Homo sapiens GN=DDX46 PE=1 SV=2	0	32.25	12.0272	11	13	11	1	1031	117.3	9.29	High		0.515	225	11
TRUE	High	Master Protein	P52597	Heterogeneous nuclear ribonucleoprotein F OS=Homo sapiens GN=HNRNPF PE=1 SV=3	0	32.232	26.747	8	10	7	1	415	45.6	5.58	High		1.462	200	8
TRUE	High	Master Protein	Q06830	Peroxiredoxin-1 OS=Homo sapiens GN=PRDX1 PE=1 SV=1	0	32.009	57.2864	9	12	8	1	199	22.1	8.13	High		4.179	217	9
TRUE	High	Master Protein	Q13057	Bifunctional coenzyme A synthase OS=Homo sapiens GN=COASY PE=1 SV=4	0	31.912	18.4397	6	7	6	1	564	62.3	6.99	High		0.859	166	6
TRUE	High	Master Protein	P62851	40S ribosomal protein S25 OS=Homo sapiens GN=RPS25 PE=1 SV=1	0	31.865	37.6	8	22	8	1	125	13.7	10.11	High		30.623	507	8
TRUE	High	Master Protein	Q15181	Inorganic pyrophosphatase OS=Homo sapiens GN=PPA1 PE=1 SV=2	0	31.619	27.6817	4	5	4	1	289	32.6	5.86	High		0.778	195	4
TRUE	High	Master Protein	Q13085	Acetyl-CoA carboxylase 1 OS=Homo sapiens GN=ACACA PE=1 SV=2	0	31.552	6.18073	10	10	10	1	2346	265.4	6.37	High		0.175	164	10
TRUE	High	Master Protein	Q14258	E3 ubiquitin/ISG15 ligase TRIM25 OS=Homo sapiens GN=TRIM25 PE=1 SV=2	0	31.549	16.5079	8	10	8	1	630	70.9	8.09	High		0.778	148	8
TRUE	High	Master Protein	O00148	ATP-dependent RNA helicase DDX39A OS=Homo sapiens GN=DDX39A PE=1 SV=2	0	31.537	25.7611	7	8	7	1	427	49.1	5.68	High		0.778	224	7
TRUE	High	Master Protein	Q92973	Transportin-1 OS=Homo sapiens GN=TNPO1 PE=1 SV=2	0	31.506	13.4744	9	10	9	1	898	102.3	4.98	High		0.619	280	9
TRUE	High	Master Protein	Q9H0U4	Ras-related protein Rab-1B OS=Homo sapiens GN=RAB1B PE=1 SV=1	0	31.489	38.3085	7	12	2	1	201	22.2	5.73	High		1.955	267	7
TRUE	High	Master Protein	P53007	Tricarboxylate transport protein, mitochondrial OS=Homo sapiens GN=SLC25A1 PE=1 SV=2	0	31.054	30.8682	8	12	8	1	311	34	9.89	High		2.162	240	8
TRUE	High	Master Protein	P26373	60S ribosomal protein L13 OS=Homo sapiens GN=RPL13 PE=1 SV=4	0	31.001	35.545	8	16	8	1	211	24.2	11.65	High		5.105	353	8
TRUE	High	Master Protein	P16401	Histone H1.5 OS=Homo sapiens GN=HIST1H1B PE=1 SV=3	0	30.971	23.8938	7	13	7	1	226	22.6	10.92	High		3.125	298	7
TRUE	High	Master Protein	P42765	3-ketoacyl-CoA thiolase, mitochondrial OS=Homo sapiens GN=ACAA2 PE=1 SV=2	0	30.874	34.5088	9	10	9	1	397	41.9	8.09	High		1.721	192	9
TRUE	High	Master Protein	P24539	ATP synthase F(0) complex subunit B1, mitochondrial OS=Homo sapiens GN=ATP5F1 PE=1 SV=2	0	30.734	26.1719	7	8	7	1	256	28.9	9.36	High		1.955	197	7
TRUE	High	Master Protein	A0M8Q6	Immunoglobulin lambda constant 7 OS=Homo sapiens GN=IGLC7 PE=1 SV=3	0	30.725	46.2264	4	54	1	1	106	11.2	8.29	High		6.197	1159	4
TRUE	High	Master Protein	P25398	40S ribosomal protein S12 OS=Homo sapiens GN=RPS12 PE=1 SV=3	0	30.691	53.7879	6	11	6	1	132	14.5	7.21	High		9	260	6
TRUE	High	Master Protein	P26640	Valine--tRNA ligase OS=Homo sapiens GN=VARS PE=1 SV=4	0	30.644	9.57278	8	8	8	1	1264	140.4	7.59	High		0.301	115	8
TRUE	High	Master Protein	P61586	Transforming protein RhoA OS=Homo sapiens GN=RHOA PE=1 SV=1	0	30.629	30.5699	6	12	2	1	193	21.8	6.1	High		3.924	174	6
TRUE	High	Master Protein	P27348	14-3-3 protein theta OS=Homo sapiens GN=YWHAQ PE=1 SV=1	0	30.462	36.3265	8	13	5	1	245	27.7	4.78	High		2.594	266	8
TRUE	High	Master Protein	P36542	ATP synthase subunit gamma, mitochondrial OS=Homo sapiens GN=ATP5C1 PE=1 SV=1	0	30.44	28.1879	7	13	7	1	298	33	9.22	High		2.162	345	7
TRUE	High	Master Protein	P09669	Cytochrome c oxidase subunit 6C OS=Homo sapiens GN=COX6C PE=1 SV=2	0	30.135	38.6667	6	12	6	1	75	8.8	10.39	High		30.623	207	6
TRUE	High	Master Protein	Q96SW2	Protein cereblon OS=Homo sapiens GN=CRBN PE=1 SV=1	0	30.105	21.267	5	7	5	1	442	50.5	5.63	High		0.738	244	5
TRUE	High	Master Protein	Q12904	Aminoacyl tRNA synthase complex-interacting multifunctional protein 1 OS=Homo sapiens GN=AIMP1 PE=1 SV=2	0	29.951	37.1795	8	11	8	1	312	34.3	8.43	High		1.976	220	8
TRUE	High	Master Protein	P30101	Protein disulfide-isomerase A3 OS=Homo sapiens GN=PDIA3 PE=1 SV=4	0	29.907	21.5842	9	10	9	1	505	56.7	6.35	High		1.009	151	9
TRUE	High	Master Protein	P61978	Heterogeneous nuclear ribonucleoprotein K OS=Homo sapiens GN=HNRNPK PE=1 SV=1	0	29.849	24.622	8	12	8	1	463	50.9	5.54	High		1.212	241	8
TRUE	High	Master Protein	P62913	60S ribosomal protein L11 OS=Homo sapiens GN=RPL11 PE=1 SV=2	0	29.844	47.7528	9	16	9	1	178	20.2	9.6	High		15.681	222	9
TRUE	High	Master Protein	Q5T749	Keratinocyte proline-rich protein OS=Homo sapiens GN=KPRP PE=1 SV=1	0	29.813	17.962	8	11	8	1	579	64.1	8.27	High		2.008	155	8
TRUE	High	Master Protein	Q13155	Aminoacyl tRNA synthase complex-interacting multifunctional protein 2 OS=Homo sapiens GN=AIMP2 PE=1 SV=2	0	29.745	28.4375	7	8	7	1	320	35.3	8.22	High		1.512	213	7
TRUE	High	Master Protein	Q9NTJ3	Structural maintenance of chromosomes protein 4 OS=Homo sapiens GN=SMC4 PE=1 SV=2	0	29.72	9.08385	7	7	7	1	1288	147.1	6.79	High		0.201	163	7
TRUE	High	Master Protein	Q9UPQ0	LIM and calponin homology domains-containing protein 1 OS=Homo sapiens GN=LIMCH1 PE=1 SV=4	0	29.533	14.9584	11	13	11	1	1083	121.8	6.47	High		0.492	152	11
TRUE	High	Master Protein	P83731	60S ribosomal protein L24 OS=Homo sapiens GN=RPL24 PE=1 SV=1	0	29.493	32.4841	7	14	7	1	157	17.8	11.25	High		9	272	7
TRUE	High	Master Protein	P35606	Coatomer subunit beta' OS=Homo sapiens GN=COPB2 PE=1 SV=2	0	29.236	13.9073	8	9	8	1	906	102.4	5.27	High	Phospho [S859(97.6)]	0.448	126	8
TRUE	High	Master Protein	P02545	Prelamin-A/C OS=Homo sapiens GN=LMNA PE=1 SV=1	0	29.18	13.1024	8	9	8	1	664	74.1	7.02	High		0.585	183	8
TRUE	High	Master Protein	Q7L0Y3	Mitochondrial ribonuclease P protein 1 OS=Homo sapiens GN=TRMT10C PE=1 SV=2	0	28.941	27.2953	8	9	8	1	403	47.3	9.36	High		1.043	134	8
TRUE	High	Master Protein	P05388	60S acidic ribosomal protein P0 OS=Homo sapiens GN=RPLP0 PE=1 SV=1	0	28.867	29.3375	7	10	7	1	317	34.3	5.97	High		1.637	194	7
TRUE	High	Master Protein	Q96T51	RUN and FYVE domain-containing protein 1 OS=Homo sapiens GN=RUFY1 PE=1 SV=2	0	28.861	15.5367	10	10	10	1	708	79.8	5.74	High		0.52	137	10
TRUE	High	Master Protein	Q13619	Cullin-4A OS=Homo sapiens GN=CUL4A PE=1 SV=3	0	28.781	12.78	8	8	3	1	759	87.6	8.13	High		0.381	148	8
TRUE	High	Master Protein	P07195	L-lactate dehydrogenase B chain OS=Homo sapiens GN=LDHB PE=1 SV=2	0	28.735	23.0539	6	8	4	1	334	36.6	6.05	High		1.154	240	6
TRUE	High	Master Protein	P31946	14-3-3 protein beta/alpha OS=Homo sapiens GN=YWHAB PE=1 SV=3	0	28.316	34.9593	8	11	3	1	246	28.1	4.83	High		2.384	191	8
TRUE	High	Master Protein	O75369	Filamin-B OS=Homo sapiens GN=FLNB PE=1 SV=2	0	28.281	4.61184	11	13	6	1	2602	278	5.73	High		0.194	162	11
TRUE	High	Master Protein	P53597	Succinate--CoA ligase [ADP/GDP-forming] subunit alpha, mitochondrial OS=Homo sapiens GN=SUCLG1 PE=1 SV=4	0	28.271	28.0347	9	14	9	1	346	36.2	8.79	High		4.412	144	9
TRUE	High	Master Protein	P60866	40S ribosomal protein S20 OS=Homo sapiens GN=RPS20 PE=1 SV=1	0	28.145	22.6891	3	8	3	1	119	13.4	9.94	High		9	196	3
TRUE	High	Master Protein	Q9Y5M8	Signal recognition particle receptor subunit beta OS=Homo sapiens GN=SRPRB PE=1 SV=3	0	27.815	29.5203	7	7	7	1	271	29.7	9.04	High		1.336	117	7
TRUE	High	Master Protein	Q96HC4	PDZ and LIM domain protein 5 OS=Homo sapiens GN=PDLIM5 PE=1 SV=5	0	27.774	18.7919	8	8	8	1	596	63.9	8.21	High		0.748	122	8
TRUE	High	Master Protein	Q16555	Dihydropyrimidinase-related protein 2 OS=Homo sapiens GN=DPYSL2 PE=1 SV=1	0	27.77	22.9021	9	12	9	1	572	62.3	6.38	High		0.84	94	9
TRUE	High	Master Protein	Q9H3U1	Protein unc-45 homolog A OS=Homo sapiens GN=UNC45A PE=1 SV=1	0	27.755	14.8305	10	10	10	1	944	103	6.07	High		0.441	197	10
TRUE	High	Master Protein	P08134	Rho-related GTP-binding protein RhoC OS=Homo sapiens GN=RHOC PE=1 SV=1	0	27.673	30.5699	6	11	2	1	193	22	6.58	High		4.337	152	6
TRUE	High	Master Protein	P41091	Eukaryotic translation initiation factor 2 subunit 3 OS=Homo sapiens GN=EIF2S3 PE=1 SV=3	0	27.518	27.1186	9	11	9	1	472	51.1	8.4	High		1.61	109	9
TRUE	High	Master Protein	Q58FF6	Putative heat shock protein HSP 90-beta 4 OS=Homo sapiens GN=HSP90AB4P PE=5 SV=1	0	27.442	13.6634	6	9	2	1	505	58.2	4.73	High		0.585	204	6
TRUE	High	Master Protein	P27824	Calnexin OS=Homo sapiens GN=CANX PE=1 SV=2	0	27.38	16.723	9	13	9	1	592	67.5	4.6	High		1.212	222	9
TRUE	High	Master Protein	P15121	Aldose reductase OS=Homo sapiens GN=AKR1B1 PE=1 SV=3	0	27.202	30.3797	6	9	6	1	316	35.8	6.98	High		1.404	105	6
TRUE	High	Master Protein	Q9NR30	Nucleolar RNA helicase 2 OS=Homo sapiens GN=DDX21 PE=1 SV=5	0	27.17	12.1328	7	8	7	1	783	87.3	9.28	High		0.52	140	7
TRUE	High	Master Protein	P61353	60S ribosomal protein L27 OS=Homo sapiens GN=RPL27 PE=1 SV=2	0	27.134	41.9118	6	13	6	1	136	15.8	10.56	High		20.544	209	6
TRUE	High	Master Protein	P62820	Ras-related protein Rab-1A OS=Homo sapiens GN=RAB1A PE=1 SV=3	0	26.997	44.3902	8	12	3	1	205	22.7	6.21	High		1.783	244	8
TRUE	High	Master Protein	P01857	Immunoglobulin heavy constant gamma 1 OS=Homo sapiens GN=IGHG1 PE=1 SV=1	0	26.961	25.4545	7	20	5	1	330	36.1	8.19	High		2.415	393	7
TRUE	High	Master Protein	P42677	40S ribosomal protein S27 OS=Homo sapiens GN=RPS27 PE=1 SV=3	0	26.849	40.4762	5	11	3	1	84	9.5	9.45	High		62.096	141	5
TRUE	High	Master Protein	P40939	Trifunctional enzyme subunit alpha, mitochondrial OS=Homo sapiens GN=HADHA PE=1 SV=2	0	26.765	17.6933	8	8	8	1	763	82.9	9.04	High		0.506	146	8
TRUE	High	Master Protein	Q9UBB4	Ataxin-10 OS=Homo sapiens GN=ATXN10 PE=1 SV=1	0	26.744	21.2632	8	8	8	1	475	53.5	5.25	High		0.812	190	8
TRUE	High	Master Protein	Q9BTW9	Tubulin-specific chaperone D OS=Homo sapiens GN=TBCD PE=1 SV=2	0	26.739	8.22148	8	9	8	1	1192	132.5	6.19	High		0.316	146	8
TRUE	High	Master Protein	P02768	Serum albumin OS=Homo sapiens GN=ALB PE=1 SV=2	0	26.707	8.21018	6	37	6	1	609	69.3	6.28	High		0.468	770	6
TRUE	High	Master Protein	Q9UHX1	Poly(U)-binding-splicing factor PUF60 OS=Homo sapiens GN=PUF60 PE=1 SV=1	0	26.532	15.7424	8	10	8	1	559	59.8	5.29	High		0.951	131	8
TRUE	High	Master Protein	Q53GQ0	Very-long-chain 3-oxoacyl-CoA reductase OS=Homo sapiens GN=HSD17B12 PE=1 SV=2	0	26.417	22.4359	5	6	5	1	312	34.3	9.32	High		1.254	157	5
TRUE	High	Master Protein	P30050	60S ribosomal protein L12 OS=Homo sapiens GN=RPL12 PE=1 SV=1	0	26.374	54.5455	6	8	6	1	165	17.8	9.42	High		2.511	268	6
TRUE	High	Master Protein	P52292	Importin subunit alpha-1 OS=Homo sapiens GN=KPNA2 PE=1 SV=1	0	26.324	11.3422	4	6	4	1	529	57.8	5.4	High		0.487	252	4
TRUE	High	Master Protein	O75116	Rho-associated protein kinase 2 OS=Homo sapiens GN=ROCK2 PE=1 SV=4	0	26.228	12.2478	13	14	12	1	1388	160.8	6.02	High		0.362	105	13
TRUE	High	Master Protein	Q14532	Keratin, type I cuticular Ha2 OS=Homo sapiens GN=KRT32 PE=2 SV=3	0	26.067	11.6071	6	26	2	1	448	50.3	4.84	High		1.212	480	6
TRUE	High	Master Protein	P31930	Cytochrome b-c1 complex subunit 1, mitochondrial OS=Homo sapiens GN=UQCRC1 PE=1 SV=3	0	25.999	21.875	6	7	6	1	480	52.6	6.37	High		0.905	149	6
TRUE	High	Master Protein	P46777	60S ribosomal protein L5 OS=Homo sapiens GN=RPL5 PE=1 SV=3	0	25.95	29.9663	9	12	9	1	297	34.3	9.72	High		3.084	111	9
TRUE	High	Master Protein	Q9NSE4	Isoleucine--tRNA ligase, mitochondrial OS=Homo sapiens GN=IARS2 PE=1 SV=2	0	25.845	9.88142	7	8	7	1	1012	113.7	7.2	High		0.334	166	7
TRUE	High	Master Protein	P61254	60S ribosomal protein L26 OS=Homo sapiens GN=RPL26 PE=1 SV=1	0	25.783	38.6207	8	16	2	1	145	17.2	10.55	High		15.681	228	8
TRUE	High	Master Protein	Q10471	Polypeptide N-acetylgalactosaminyltransferase 2 OS=Homo sapiens GN=GALNT2 PE=1 SV=1	0	25.588	20.8406	8	10	8	1	571	64.7	8.35	High		0.778	112	8
TRUE	High	Master Protein	P42766	60S ribosomal protein L35 OS=Homo sapiens GN=RPL35 PE=1 SV=2	0	25.576	30.8943	6	11	6	1	123	14.5	11.05	High		20.544	211	6
TRUE	High	Master Protein	O60716	Catenin delta-1 OS=Homo sapiens GN=CTNND1 PE=1 SV=1	0	25.53	11.3636	8	9	8	1	968	108.1	6.23	High		0.381	166	8
TRUE	High	Master Protein	P0C0S5	Histone H2A.Z OS=Homo sapiens GN=H2AFZ PE=1 SV=2	0	25.481	53.9062	5	10	3	1	128	13.5	10.58	High		13.678	190	5
TRUE	High	Master Protein	Q8NC51	Plasminogen activator inhibitor 1 RNA-binding protein OS=Homo sapiens GN=SERBP1 PE=1 SV=2	0	25.335	27.9412	7	9	7	1	408	44.9	8.65	High		0.957	144	7
TRUE	High	Master Protein	P24752	Acetyl-CoA acetyltransferase, mitochondrial OS=Homo sapiens GN=ACAT1 PE=1 SV=1	0	25.307	20.8431	6	8	6	1	427	45.2	8.85	High		0.978	174	6
TRUE	High	Master Protein	P68431	Histone H3.1 OS=Homo sapiens GN=HIST1H3A PE=1 SV=2	0	25.06	43.3824	4	8	4	1	136	15.4	11.12	High		4.179	209	4
TRUE	High	Master Protein	Q9UBX3	Mitochondrial dicarboxylate carrier OS=Homo sapiens GN=SLC25A10 PE=1 SV=2	0	25.006	29.2683	6	7	6	1	287	31.3	9.54	High		1.336	169	6
TRUE	High	Master Protein	P36776	Lon protease homolog, mitochondrial OS=Homo sapiens GN=LONP1 PE=1 SV=2	0	24.776	10.6361	8	10	8	1	959	106.4	6.39	High		0.458	159	8
TRUE	High	Master Protein	P04083	Annexin A1 OS=Homo sapiens GN=ANXA1 PE=1 SV=2	0	24.762	21.6763	6	6	6	1	346	38.7	7.02	High		0.931	156	6
TRUE	High	Master Protein	Q9BV20	Methylthioribose-1-phosphate isomerase OS=Homo sapiens GN=MRI1 PE=1 SV=1	0	24.308	18.9702	6	7	6	1	369	39.1	6.3	High		1.081	141	6
TRUE	High	Master Protein	P12004	Proliferating cell nuclear antigen OS=Homo sapiens GN=PCNA PE=1 SV=1	0	24.295	36.7816	7	11	7	1	261	28.8	4.69	High		1.637	189	7
TRUE	High	Master Protein	P07741	Adenine phosphoribosyltransferase OS=Homo sapiens GN=APRT PE=1 SV=2	0	24.084	45.5556	6	7	6	1	180	19.6	6.02	High		1.683	153	6
TRUE	High	Master Protein	Q7L1Q6	Basic leucine zipper and W2 domain-containing protein 1 OS=Homo sapiens GN=BZW1 PE=1 SV=1	0	23.996	23.1504	12	13	9	1	419	48	5.92	High		1.512	183	12
TRUE	High	Master Protein	O14950	Myosin regulatory light chain 12B OS=Homo sapiens GN=MYL12B PE=1 SV=2	0	23.89	34.3023	5	6	5	1	172	19.8	4.84	High		1.848	208	5
TRUE	High	Master Protein	P14649	Myosin light chain 6B OS=Homo sapiens GN=MYL6B PE=1 SV=1	0	23.844	26.4423	4	8	2	1	208	22.8	5.73	High		1.683	219	4
TRUE	High	Master Protein	P05198	Eukaryotic translation initiation factor 2 subunit 1 OS=Homo sapiens GN=EIF2S1 PE=1 SV=3	0	23.767	23.1746	6	7	6	1	315	36.1	5.08	High		1.081	199	6
TRUE	High	Master Protein	Q6PGP7	Tetratricopeptide repeat protein 37 OS=Homo sapiens GN=TTC37 PE=1 SV=1	0	23.577	6.26598	8	8	8	1	1564	175.4	7.53	High		0.209	163	8
TRUE	High	Master Protein	P62910	60S ribosomal protein L32 OS=Homo sapiens GN=RPL32 PE=1 SV=2	0	23.504	41.4815	7	11	7	1	135	15.9	11.33	High		9	221	7
TRUE	High	Master Protein	P61619	Protein transport protein Sec61 subunit alpha isoform 1 OS=Homo sapiens GN=SEC61A1 PE=1 SV=2	0	23.311	8.61345	5	9	5	1	476	52.2	8.06	High		1.512	145	5
TRUE	High	Master Protein	Q12931	Heat shock protein 75 kDa, mitochondrial OS=Homo sapiens GN=TRAP1 PE=1 SV=3	0	23.288	8.66477	5	8	4	1	704	80.1	8.21	High		0.334	197	5
TRUE	High	Master Protein	O14929	Histone acetyltransferase type B catalytic subunit OS=Homo sapiens GN=HAT1 PE=1 SV=1	0	23.276	17.8998	5	6	5	1	419	49.5	5.69	High		0.65	177	5
TRUE	High	Master Protein	P50914	60S ribosomal protein L14 OS=Homo sapiens GN=RPL14 PE=1 SV=4	0	23.246	20.9302	4	8	4	1	215	23.4	10.93	High		1.61	264	4
TRUE	High	Master Protein	P30153	Serine/threonine-protein phosphatase 2A 65 kDa regulatory subunit A alpha isoform OS=Homo sapiens GN=PPP2R1A PE=1 SV=4	0	23.233	16.129	9	10	9	1	589	65.3	5.11	High		0.805	140	9
TRUE	High	Master Protein	P32322	Pyrroline-5-carboxylate reductase 1, mitochondrial OS=Homo sapiens GN=PYCR1 PE=1 SV=2	0	23.193	21.9436	5	5	5	1	319	33.3	7.61	High		0.968	175	5
TRUE	High	Master Protein	P55010	Eukaryotic translation initiation factor 5 OS=Homo sapiens GN=EIF5 PE=1 SV=2	0	23.074	19.4896	7	9	7	1	431	49.2	5.58	High		1.154	98	7
TRUE	High	Master Protein	Q15365	Poly(rC)-binding protein 1 OS=Homo sapiens GN=PCBP1 PE=1 SV=2	0	23.019	21.0674	5	5	4	1	356	37.5	7.09	High		0.73	174	5
TRUE	High	Master Protein	Q9UNX3	60S ribosomal protein L26-like 1 OS=Homo sapiens GN=RPL26L1 PE=1 SV=1	0	22.901	33.1034	7	12	1	1	145	17.2	10.55	High		9	213	7
TRUE	High	Master Protein	Q29RF7	Sister chromatid cohesion protein PDS5 homolog A OS=Homo sapiens GN=PDS5A PE=1 SV=1	0	22.861	7.40464	6	6	6	1	1337	150.7	7.91	High		0.168	154	6
TRUE	High	Master Protein	Q9NZ01	Very-long-chain enoyl-CoA reductase OS=Homo sapiens GN=TECR PE=1 SV=1	0	22.8	18.5065	6	9	6	1	308	36	9.45	High		1.783	134	6
TRUE	High	Master Protein	P01859	Immunoglobulin heavy constant gamma 2 OS=Homo sapiens GN=IGHG2 PE=1 SV=2	0	22.699	20.5521	6	13	4	1	326	35.9	7.59	High		1.683	277	6
TRUE	High	Master Protein	P62249	40S ribosomal protein S16 OS=Homo sapiens GN=RPS16 PE=1 SV=2	0	22.225	34.9315	6	14	6	1	146	16.4	10.21	High		3.642	266	6
TRUE	High	Master Protein	P62847	40S ribosomal protein S24 OS=Homo sapiens GN=RPS24 PE=1 SV=1	0	22.223	20.3008	3	9	3	1	133	15.4	10.78	High		6.197	239	3
TRUE	High	Master Protein	Q9UHB6	LIM domain and actin-binding protein 1 OS=Homo sapiens GN=LIMA1 PE=1 SV=1	0	22.208	12.5165	7	9	7	1	759	85.2	6.84	High	Phospho [S490(97.4)]	0.438	93	7
TRUE	High	Master Protein	P05783	Keratin, type I cytoskeletal 18 OS=Homo sapiens GN=KRT18 PE=1 SV=2	0	22.015	13.7209	5	5	5	1	430	48	5.45	High		0.468	173	5
TRUE	High	Master Protein	Q13620	Cullin-4B OS=Homo sapiens GN=CUL4B PE=1 SV=4	0	22.006	8.98138	8	8	3	1	913	103.9	7.37	High		0.328	111	8
TRUE	High	Master Protein	P62841	40S ribosomal protein S15 OS=Homo sapiens GN=RPS15 PE=1 SV=2	0	21.638	27.5862	3	9	3	1	145	17	10.39	High		2.728	101	3
TRUE	High	Master Protein	P27797	Calreticulin OS=Homo sapiens GN=CALR PE=1 SV=1	0	21.515	24.4604	9	11	9	1	417	48.1	4.44	High		1.649	111	9
TRUE	High	Master Protein	P78344	Eukaryotic translation initiation factor 4 gamma 2 OS=Homo sapiens GN=EIF4G2 PE=1 SV=1	0	21.426	9.15105	7	7	7	1	907	102.3	7.14	High		0.32	149	7
TRUE	High	Master Protein	O60884	DnaJ homolog subfamily A member 2 OS=Homo sapiens GN=DNAJA2 PE=1 SV=1	0	21.327	22.5728	6	8	6	1	412	45.7	6.48	High		0.778	182	6
TRUE	High	Master Protein	Q13418	Integrin-linked protein kinase OS=Homo sapiens GN=ILK PE=1 SV=2	0	21.279	16.8142	7	9	7	1	452	51.4	8.07	High		0.931	206	7
TRUE	High	Master Protein	Q27J81	Inverted formin-2 OS=Homo sapiens GN=INF2 PE=1 SV=2	0	21.147	8.16653	8	8	8	1	1249	135.5	5.38	High		0.297	121	8
TRUE	High	Master Protein	P19338	Nucleolin OS=Homo sapiens GN=NCL PE=1 SV=3	0	21.102	12.1127	5	5	5	1	710	76.6	4.7	High		0.271	133	5
TRUE	High	Master Protein	P08237	ATP-dependent 6-phosphofructokinase, muscle type OS=Homo sapiens GN=PFKM PE=1 SV=2	0	21.072	14.6154	7	8	5	1	780	85.1	7.99	High		0.359	106	7
TRUE	High	Master Protein	P22392	Nucleoside diphosphate kinase B OS=Homo sapiens GN=NME2 PE=1 SV=1	0	21.047	30.9211	4	7	4	1	152	17.3	8.41	High		2.162	86	4
TRUE	High	Master Protein	P46779	60S ribosomal protein L28 OS=Homo sapiens GN=RPL28 PE=1 SV=3	0	20.733	35.0365	7	8	7	1	137	15.7	12.02	High		3.329	202	7
TRUE	High	Master Protein	P30508	HLA class I histocompatibility antigen, Cw-12 alpha chain OS=Homo sapiens GN=HLA-C PE=1 SV=2	0	20.604	21.5847	5	7	1	1	366	40.9	6.3	High		0.73	125	5
TRUE	High	Master Protein	P28066	Proteasome subunit alpha type-5 OS=Homo sapiens GN=PSMA5 PE=1 SV=3	0	20.593	28.2158	5	7	5	1	241	26.4	4.79	High		2.511	198	5
TRUE	High	Master Protein	Q16718	NADH dehydrogenase [ubiquinone] 1 alpha subcomplex subunit 5 OS=Homo sapiens GN=NDUFA5 PE=1 SV=3	0	20.576	36.2069	2	3	2	1	116	13.5	5.99	High		1.683	111	2
TRUE	High	Master Protein	Q8WXA9	Splicing regulatory glutamine/lysine-rich protein 1 OS=Homo sapiens GN=SREK1 PE=1 SV=1	0	20.532	15.1575	5	6	5	1	508	59.3	10.39	High		1.894	169	5
TRUE	High	Master Protein	O95816	BAG family molecular chaperone regulator 2 OS=Homo sapiens GN=BAG2 PE=1 SV=1	0	20.53	36.019	5	5	5	1	211	23.8	6.7	High		1.054	128	5
TRUE	High	Master Protein	O43795	Unconventional myosin-Ib OS=Homo sapiens GN=MYO1B PE=1 SV=3	0	20.509	5.28169	5	6	5	1	1136	131.9	9.38	High		0.218	91	5
TRUE	High	Master Protein	P23634	Plasma membrane calcium-transporting ATPase 4 OS=Homo sapiens GN=ATP2B4 PE=1 SV=2	0	20.48	7.81628	7	8	2	1	1241	137.8	6.6	High		0.322	145	7
TRUE	High	Master Protein	P80748	Immunoglobulin lambda variable 3-21 OS=Homo sapiens GN=IGLV3-21 PE=1 SV=2	0	20.271	48.7179	3	6	3	1	117	12.4	5.29	High		5.31	313	3
TRUE	High	Master Protein	Q53EL6	Programmed cell death protein 4 OS=Homo sapiens GN=PDCD4 PE=1 SV=2	0	20.253	13.0064	4	4	4	1	469	51.7	5.21	High		0.407	116	4
TRUE	High	Master Protein	Q93008	Probable ubiquitin carboxyl-terminal hydrolase FAF-X OS=Homo sapiens GN=USP9X PE=1 SV=3	0	20.238	1.82879	4	5	4	1	2570	292.1	5.8	High		0.084	147	4
TRUE	High	Master Protein	Q9H845	Acyl-CoA dehydrogenase family member 9, mitochondrial OS=Homo sapiens GN=ACAD9 PE=1 SV=1	0	20.137	13.3655	9	9	9	1	621	68.7	7.96	High		0.658	65	9
TRUE	High	Master Protein	O95747	Serine/threonine-protein kinase OSR1 OS=Homo sapiens GN=OXSR1 PE=1 SV=1	0	20.014	12.5237	5	5	5	1	527	58	6.43	High		0.487	154	5
TRUE	High	Master Protein	Q14157	Ubiquitin-associated protein 2-like OS=Homo sapiens GN=UBAP2L PE=1 SV=2	0	19.934	5.79577	4	5	4	1	1087	114.5	7.11	High		0.389	108	4
TRUE	High	Master Protein	P28340	DNA polymerase delta catalytic subunit OS=Homo sapiens GN=POLD1 PE=1 SV=2	0	19.882	8.49142	7	7	7	1	1107	123.6	7.03	High		0.24	109	7
TRUE	High	Master Protein	Q92522	Histone H1x OS=Homo sapiens GN=H1FX PE=1 SV=1	0	19.773	23.0047	5	5	5	1	213	22.5	10.76	High		1.276	118	5
TRUE	High	Master Protein	P63241	Eukaryotic translation initiation factor 5A-1 OS=Homo sapiens GN=EIF5A PE=1 SV=2	0	19.761	50.6494	5	8	5	1	154	16.8	5.24	High		4.623	160	5
TRUE	High	Master Protein	O60506	Heterogeneous nuclear ribonucleoprotein Q OS=Homo sapiens GN=SYNCRIP PE=1 SV=2	0	19.637	11.878	6	7	5	1	623	69.6	8.59	High		0.496	86	6
TRUE	High	Master Protein	P46778	60S ribosomal protein L21 OS=Homo sapiens GN=RPL21 PE=1 SV=2	0	19.532	26.875	4	9	4	1	160	18.6	10.49	High		3.642	202	4
TRUE	High	Master Protein	P69905	Hemoglobin subunit alpha OS=Homo sapiens GN=HBA1 PE=1 SV=2	0	19.388	34.507	5	6	5	1	142	15.2	8.68	High		4.623	59	5
TRUE	High	Master Protein	P17980	26S protease regulatory subunit 6A OS=Homo sapiens GN=PSMC3 PE=1 SV=3	0	19.356	23.0068	6	6	6	1	439	49.2	5.24	High		0.668	116	6
TRUE	High	Master Protein	A0A0C4DH25	Immunoglobulin kappa variable 3D-20 OS=Homo sapiens GN=IGKV3D-20 PE=3 SV=1	0	19.275	27.5862	4	8	4	1	116	12.5	4.59	High		3.642	365	4
TRUE	High	Master Protein	Q9UGI8	Testin OS=Homo sapiens GN=TES PE=1 SV=1	0	19.255	16.8646	6	8	6	1	421	48	7.68	High		0.778	121	6
TRUE	High	Master Protein	O95299	NADH dehydrogenase [ubiquinone] 1 alpha subcomplex subunit 10, mitochondrial OS=Homo sapiens GN=NDUFA10 PE=1 SV=1	0	19.212	16.338	4	4	4	1	355	40.7	8.48	High		0.468	111	4
TRUE	High	Master Protein	P35268	60S ribosomal protein L22 OS=Homo sapiens GN=RPL22 PE=1 SV=2	0	19.175	39.8438	4	8	4	1	128	14.8	9.19	High		5.813	161	4
TRUE	High	Master Protein	Q9Y3U8	60S ribosomal protein L36 OS=Homo sapiens GN=RPL36 PE=1 SV=3	0	19.143	36.1905	5	9	4	1	105	12.2	11.59	High		13.678	162	5
TRUE	High	Master Protein	O75340	Programmed cell death protein 6 OS=Homo sapiens GN=PDCD6 PE=1 SV=1	0	18.905	35.0785	6	7	6	1	191	21.9	5.4	High		2.511	122	6
TRUE	High	Master Protein	Q09666	Neuroblast differentiation-associated protein AHNAK OS=Homo sapiens GN=AHNAK PE=1 SV=2	0	18.898	4.66893	8	9	8	1	5890	628.7	6.15	High		0.051	71	8
TRUE	High	Master Protein	A6NDG6	Glycerol-3-phosphate phosphatase OS=Homo sapiens GN=PGP PE=1 SV=1	0	18.813	18.0685	5	6	5	1	321	34	6.14	High		0.995	114	5
TRUE	High	Master Protein	Q7Z2W4	Zinc finger CCCH-type antiviral protein 1 OS=Homo sapiens GN=ZC3HAV1 PE=1 SV=3	0	18.725	6.09756	4	4	4	1	902	101.4	8.4	High		0.152	157	4
TRUE	High	Master Protein	P38919	Eukaryotic initiation factor 4A-III OS=Homo sapiens GN=EIF4A3 PE=1 SV=4	0	18.718	11.4355	6	8	3	1	411	46.8	6.73	High		0.905	81	6
TRUE	High	Master Protein	P51571	Translocon-associated protein subunit delta OS=Homo sapiens GN=SSR4 PE=1 SV=1	0	18.645	30.6358	4	5	4	1	173	19	6.15	High		1.512	150	4
TRUE	High	Master Protein	P80723	Brain acid soluble protein 1 OS=Homo sapiens GN=BASP1 PE=1 SV=2	0	18.624	63.4361	7	9	7	1	227	22.7	4.63	High		2.455	125	7
TRUE	High	Master Protein	P63000	Ras-related C3 botulinum toxin substrate 1 OS=Homo sapiens GN=RAC1 PE=1 SV=1	0	18.552	23.4375	4	6	3	1	192	21.4	8.5	High		2.594	141	4
TRUE	High	Master Protein	P62266	40S ribosomal protein S23 OS=Homo sapiens GN=RPS23 PE=1 SV=3	0	18.529	34.965	4	10	4	1	143	15.8	10.49	High		4.623	191	4
TRUE	High	Master Protein	P55209	Nucleosome assembly protein 1-like 1 OS=Homo sapiens GN=NAP1L1 PE=1 SV=1	0	18.485	19.9488	4	4	3	1	391	45.3	4.46	High		0.848	86	4
TRUE	High	Master Protein	O00299	Chloride intracellular channel protein 1 OS=Homo sapiens GN=CLIC1 PE=1 SV=4	0	18.443	39.834	6	6	6	1	241	26.9	5.17	High		1.254	87	6
TRUE	High	Master Protein	P20020	Plasma membrane calcium-transporting ATPase 1 OS=Homo sapiens GN=ATP2B1 PE=1 SV=3	0	18.307	7.15421	6	7	1	1	1258	138.7	6.04	High		0.263	127	6
TRUE	High	Master Protein	Q7Z794	Keratin, type II cytoskeletal 1b OS=Homo sapiens GN=KRT77 PE=2 SV=3	0	18.185	6.57439	5	14	1	1	578	61.9	5.99	High		0.484	345	5
TRUE	High	Master Protein	Q14192	Four and a half LIM domains protein 2 OS=Homo sapiens GN=FHL2 PE=1 SV=3	0	18.067	30.1075	7	8	7	1	279	32.2	7.55	High		1.154	76	7
TRUE	High	Master Protein	P38117	Electron transfer flavoprotein subunit beta OS=Homo sapiens GN=ETFB PE=1 SV=3	0	18.036	32.9412	7	8	7	1	255	27.8	8.1	High		1.738	134	7
TRUE	High	Master Protein	P84095	Rho-related GTP-binding protein RhoG OS=Homo sapiens GN=RHOG PE=1 SV=1	0	18.004	37.6963	5	5	4	1	191	21.3	8.12	High		1.61	93	5
TRUE	High	Master Protein	Q15418	Ribosomal protein S6 kinase alpha-1 OS=Homo sapiens GN=RPS6KA1 PE=1 SV=2	0	17.901	9.93197	7	8	3	1	735	82.7	7.83	High		0.492	37	7
TRUE	High	Master Protein	Q86Y46	Keratin, type II cytoskeletal 73 OS=Homo sapiens GN=KRT73 PE=1 SV=1	0	17.669	7.03704	6	14	2	1	540	58.9	7.23	High		0.585	225	6
TRUE	High	Master Protein	P48507	Glutamate--cysteine ligase regulatory subunit OS=Homo sapiens GN=GCLM PE=1 SV=1	0	17.656	16.4234	3	3	3	1	274	30.7	6.02	High		0.701	124	3
TRUE	High	Master Protein	Q16658	Fascin OS=Homo sapiens GN=FSCN1 PE=1 SV=3	0	17.58	16.43	7	7	7	1	493	54.5	7.24	High		0.743	79	7
TRUE	High	Master Protein	Q16891	MICOS complex subunit MIC60 OS=Homo sapiens GN=IMMT PE=1 SV=1	0	17.512	8.97098	6	6	6	1	758	83.6	6.48	High		0.298	87	6
TRUE	High	Master Protein	Q9C0C2	182 kDa tankyrase-1-binding protein OS=Homo sapiens GN=TNKS1BP1 PE=1 SV=4	0	17.508	6.01504	7	7	7	1	1729	181.7	4.86	High		0.189	142	7
TRUE	High	Master Protein	P61224	Ras-related protein Rap-1b OS=Homo sapiens GN=RAP1B PE=1 SV=1	0	17.443	26.6304	4	4	1	1	184	20.8	5.78	High		1.154	107	4
TRUE	High	Master Protein	Q96D15	Reticulocalbin-3 OS=Homo sapiens GN=RCN3 PE=1 SV=1	0	17.374	19.5122	4	4	4	1	328	37.5	4.89	High		0.848	112	4
TRUE	High	Master Protein	Q9H4A4	Aminopeptidase B OS=Homo sapiens GN=RNPEP PE=1 SV=2	0	17.321	14.1538	6	6	6	1	650	72.5	5.74	High		0.468	111	6
TRUE	High	Master Protein	Q9NR31	GTP-binding protein SAR1a OS=Homo sapiens GN=SAR1A PE=1 SV=1	0	17.157	26.2626	5	5	5	1	198	22.4	6.68	High		1.154	93	5
TRUE	High	Master Protein	Q15738	Sterol-4-alpha-carboxylate 3-dehydrogenase, decarboxylating OS=Homo sapiens GN=NSDHL PE=1 SV=2	0	17.121	11.2601	3	5	3	1	373	41.9	8.06	High		0.425	76	3
TRUE	High	Master Protein	P19367	Hexokinase-1 OS=Homo sapiens GN=HK1 PE=1 SV=3	0	17.026	5.12541	4	4	3	1	917	102.4	6.8	High		0.186	91	4
TRUE	High	Master Protein	P61513	60S ribosomal protein L37a OS=Homo sapiens GN=RPL37A PE=1 SV=2	0	17.007	41.3043	3	6	3	1	92	10.3	10.43	High		3.642	167	3
TRUE	High	Master Protein	P53985	Monocarboxylate transporter 1 OS=Homo sapiens GN=SLC16A1 PE=1 SV=3	0	16.929	7.2	4	4	4	1	500	53.9	8.66	High		0.719	61	4
TRUE	High	Master Protein	P09211	Glutathione S-transferase P OS=Homo sapiens GN=GSTP1 PE=1 SV=2	0	16.774	40.4762	6	7	6	1	210	23.3	5.64	High		2.162	109	6
TRUE	High	Master Protein	P62854	40S ribosomal protein S26 OS=Homo sapiens GN=RPS26 PE=1 SV=3	0	16.754	44.3478	4	7	4	1	115	13	11	High		5.813	117	4
TRUE	High	Master Protein	Q9Y508	E3 ubiquitin-protein ligase RNF114 OS=Homo sapiens GN=RNF114 PE=1 SV=1	0	16.714	11.4035	3	6	3	1	228	25.7	7.25	High		1.371	95	3
TRUE	High	Master Protein	P60174	Triosephosphate isomerase OS=Homo sapiens GN=TPI1 PE=1 SV=3	0	16.593	19.5804	4	5	4	1	286	30.8	5.92	High		0.833	101	4
TRUE	High	Master Protein	Q96TA1	Niban-like protein 1 OS=Homo sapiens GN=FAM129B PE=1 SV=3	0	16.475	7.37265	4	4	4	1	746	84.1	6.19	High		0.227	90	4
TRUE	High	Master Protein	P50213	Isocitrate dehydrogenase [NAD] subunit alpha, mitochondrial OS=Homo sapiens GN=IDH3A PE=1 SV=1	0	16.368	16.6667	6	6	6	1	366	39.6	6.92	High		0.931	91	6
TRUE	High	Master Protein	P17096	High mobility group protein HMG-I/HMG-Y OS=Homo sapiens GN=HMGA1 PE=1 SV=3	0	16.309	23.3645	2	5	2	1	107	11.7	10.32	High		2.162	121	2
TRUE	High	Master Protein	P30520	Adenylosuccinate synthetase isozyme 2 OS=Homo sapiens GN=ADSS PE=1 SV=3	0	16.253	9.64912	3	3	3	1	456	50.1	6.55	High		0.28	113	3
TRUE	High	Master Protein	P02786	Transferrin receptor protein 1 OS=Homo sapiens GN=TFRC PE=1 SV=2	0	16.231	9.34211	5	6	5	1	760	84.8	6.61	High		0.311	88	5
TRUE	High	Master Protein	Q5D862	Filaggrin-2 OS=Homo sapiens GN=FLG2 PE=1 SV=1	0	16.211	4.266	5	5	5	1	2391	247.9	8.31	High		0.135	104	5
TRUE	High	Master Protein	P50238	Cysteine-rich protein 1 OS=Homo sapiens GN=CRIP1 PE=1 SV=3	0	16.153	46.7532	2	5	2	1	77	8.5	8.75	High		2.981	31	2
TRUE	High	Master Protein	P47813	Eukaryotic translation initiation factor 1A, X-chromosomal OS=Homo sapiens GN=EIF1AX PE=1 SV=2	0	16.148	36.8056	4	4	4	1	144	16.5	5.24	High		1.512	143	4
TRUE	High	Master Protein	Q01650	Large neutral amino acids transporter small subunit 1 OS=Homo sapiens GN=SLC7A5 PE=1 SV=2	0	16.1	6.70611	3	5	3	1	507	55	7.72	High		0.778	89	3
TRUE	High	Master Protein	P40429	60S ribosomal protein L13a OS=Homo sapiens GN=RPL13A PE=1 SV=2	0	16.071	14.7783	5	13	5	1	203	23.6	10.93	High		1.581	102	5
TRUE	High	Master Protein	Q14738	Serine/threonine-protein phosphatase 2A 56 kDa regulatory subunit delta isoform OS=Homo sapiens GN=PPP2R5D PE=1 SV=1	0	16.056	8.80399	4	5	4	1	602	69.9	8.13	High		0.417	84	4
TRUE	High	Master Protein	Q9H4M9	EH domain-containing protein 1 OS=Homo sapiens GN=EHD1 PE=1 SV=2	0	15.99	12.9213	5	5	4	1	534	60.6	6.83	High		0.389	55	5
TRUE	High	Master Protein	P09429	High mobility group protein B1 OS=Homo sapiens GN=HMGB1 PE=1 SV=3	0	15.965	35.3488	6	7	6	1	215	24.9	5.74	High		3.329	96	6
TRUE	High	Master Protein	P51153	Ras-related protein Rab-13 OS=Homo sapiens GN=RAB13 PE=1 SV=1	0	15.94	24.1379	5	7	2	1	203	22.8	9.19	High		1.512	162	5
TRUE	High	Master Protein	Q9UBT2	SUMO-activating enzyme subunit 2 OS=Homo sapiens GN=UBA2 PE=1 SV=2	0	15.918	8.125	5	6	5	1	640	71.2	5.29	High		0.377	133	5
TRUE	High	Master Protein	Q15366	Poly(rC)-binding protein 2 OS=Homo sapiens GN=PCBP2 PE=1 SV=1	0	15.836	14.2466	4	5	3	1	365	38.6	6.79	High		0.585	120	4
TRUE	High	Master Protein	P84098	60S ribosomal protein L19 OS=Homo sapiens GN=RPL19 PE=1 SV=1	0	15.8	18.8776	4	4	4	1	196	23.5	11.47	High		1.783	144	4
TRUE	High	Master Protein	Q92974	Rho guanine nucleotide exchange factor 2 OS=Homo sapiens GN=ARHGEF2 PE=1 SV=4	0	15.719	5.27383	4	4	4	1	986	111.5	7.27	High		0.152	73	4
TRUE	High	Master Protein	P63104	14-3-3 protein zeta/delta OS=Homo sapiens GN=YWHAZ PE=1 SV=1	0	15.694	20.4082	4	6	2	1	245	27.7	4.79	High		0.833	151	4
TRUE	High	Master Protein	P0DMN0	Sulfotransferase 1A4 OS=Homo sapiens GN=SULT1A4 PE=1 SV=1	0	15.673	25.7627	5	5	5	1	295	34.2	6.01	High		0.778	90	5
TRUE	High	Master Protein	Q16719	Kynureninase OS=Homo sapiens GN=KYNU PE=1 SV=1	0	15.662	9.24731	3	3	3	1	465	52.3	7.03	High		0.259	110	3
TRUE	High	Master Protein	P06744	Glucose-6-phosphate isomerase OS=Homo sapiens GN=GPI PE=1 SV=4	0	15.592	14.8746	8	8	8	1	558	63.1	8.32	High		0.668	47	8
TRUE	High	Master Protein	Q9NYL9	Tropomodulin-3 OS=Homo sapiens GN=TMOD3 PE=1 SV=1	0	15.581	22.4432	5	5	5	1	352	39.6	5.19	High		0.468	77	5
TRUE	High	Master Protein	Q6YN16	Hydroxysteroid dehydrogenase-like protein 2 OS=Homo sapiens GN=HSDL2 PE=1 SV=1	0	15.559	13.6364	3	3	3	1	418	45.4	7.99	High		0.28	107	3
TRUE	High	Master Protein	Q9HAV4	Exportin-5 OS=Homo sapiens GN=XPO5 PE=1 SV=1	0	15.356	5.89701	5	5	5	1	1204	136.2	5.8	High		0.182	94	5
TRUE	High	Master Protein	Q9Y2Q3	Glutathione S-transferase kappa 1 OS=Homo sapiens GN=GSTK1 PE=1 SV=3	0	15.313	26.5487	5	5	5	1	226	25.5	8.41	High		1.154	124	5
TRUE	High	Master Protein	P19525	Interferon-induced, double-stranded RNA-activated protein kinase OS=Homo sapiens GN=EIF2AK2 PE=1 SV=2	0	15.306	8.89292	4	5	4	1	551	62.1	8.4	High		0.557	103	4
TRUE	High	Master Protein	P46977	Dolichyl-diphosphooligosaccharide--protein glycosyltransferase subunit STT3A OS=Homo sapiens GN=STT3A PE=1 SV=2	0	15.186	8.79433	5	5	4	1	705	80.5	8.07	High		0.343	92	5
TRUE	High	Master Protein	P43307	Translocon-associated protein subunit alpha OS=Homo sapiens GN=SSR1 PE=1 SV=3	0	15.14	11.8881	4	5	4	1	286	32.2	4.49	High		1.154	117	4
TRUE	High	Master Protein	O43324	Eukaryotic translation elongation factor 1 epsilon-1 OS=Homo sapiens GN=EEF1E1 PE=1 SV=1	0	15.097	34.4828	4	4	4	1	174	19.8	8.54	High		0.848	110	4
TRUE	High	Master Protein	P51149	Ras-related protein Rab-7a OS=Homo sapiens GN=RAB7A PE=1 SV=1	0	15.084	29.9517	6	7	6	1	207	23.5	6.7	High		1.581	87	6
TRUE	High	Master Protein	P62834	Ras-related protein Rap-1A OS=Homo sapiens GN=RAP1A PE=1 SV=1	0	15.069	26.6304	4	4	1	1	184	21	6.67	High		1.512	72	4
TRUE	High	Master Protein	P50990	T-complex protein 1 subunit theta OS=Homo sapiens GN=CCT8 PE=1 SV=4	0	14.995	7.11679	3	3	3	1	548	59.6	5.6	High		0.184	97	3
TRUE	High	Master Protein	Q08379	Golgin subfamily A member 2 OS=Homo sapiens GN=GOLGA2 PE=1 SV=3	0	14.943	6.98603	6	6	6	1	1002	113	5.02	High		0.254	98	6
TRUE	High	Master Protein	Q96N66	Lysophospholipid acyltransferase 7 OS=Homo sapiens GN=MBOAT7 PE=1 SV=2	0	14.92	13.5593	5	7	5	1	472	52.7	8.97	High		0.688	131	5
TRUE	High	Master Protein	Q969V3	Nicalin OS=Homo sapiens GN=NCLN PE=1 SV=2	0	14.858	9.59147	4	4	4	1	563	62.9	6.89	High		0.346	78	4
TRUE	High	Master Protein	Q9HBH0	Rho-related GTP-binding protein RhoF OS=Homo sapiens GN=RHOF PE=1 SV=1	0	14.845	25.5924	4	4	4	1	211	23.6	8.65	High		1.154	91	4
TRUE	High	Master Protein	P01700	Immunoglobulin lambda variable 1-47 OS=Homo sapiens GN=IGLV1-47 PE=1 SV=2	0	14.833	29.0598	3	6	3	1	117	12.3	5.91	High		5.31	162	3
TRUE	High	Master Protein	O60763	General vesicular transport factor p115 OS=Homo sapiens GN=USO1 PE=1 SV=2	0	14.808	3.9501	3	4	3	1	962	107.8	4.91	High		0.194	154	3
TRUE	High	Master Protein	Q9Y223	Bifunctional UDP-N-acetylglucosamine 2-epimerase/N-acetylmannosamine kinase OS=Homo sapiens GN=GNE PE=1 SV=1	0	14.778	6.09418	4	5	4	1	722	79.2	6.8	High		0.324	91	4
TRUE	High	Master Protein	Q02978	Mitochondrial 2-oxoglutarate/malate carrier protein OS=Homo sapiens GN=SLC25A11 PE=1 SV=3	0	14.772	12.1019	3	4	3	1	314	34	9.91	High		0.551	102	3
TRUE	High	Master Protein	O15479	Melanoma-associated antigen B2 OS=Homo sapiens GN=MAGEB2 PE=1 SV=3	0	14.746	9.71787	3	4	3	1	319	35.3	8.76	High		0.778	111	3
TRUE	High	Master Protein	P08243	Asparagine synthetase [glutamine-hydrolyzing] OS=Homo sapiens GN=ASNS PE=1 SV=4	0	14.548	9.44742	4	4	4	1	561	64.3	6.86	High		0.283	139	4
TRUE	High	Master Protein	P07602	Prosaposin OS=Homo sapiens GN=PSAP PE=1 SV=2	0	14.528	10.3053	4	4	4	1	524	58.1	5.17	High		0.311	90	4
TRUE	High	Master Protein	P07919	Cytochrome b-c1 complex subunit 6, mitochondrial OS=Homo sapiens GN=UQCRH PE=1 SV=2	0	14.506	28.5714	2	3	2	1	91	10.7	4.44	High		1.683	80	2
TRUE	High	Master Protein	P49643	DNA primase large subunit OS=Homo sapiens GN=PRIM2 PE=1 SV=2	0	14.425	6.87623	3	4	3	1	509	58.8	7.91	High		0.292	88	3
TRUE	High	Master Protein	P62136	Serine/threonine-protein phosphatase PP1-alpha catalytic subunit OS=Homo sapiens GN=PPP1CA PE=1 SV=1	0	14.412	20.303	5	5	5	1	330	37.5	6.33	High		0.778	91	5
TRUE	High	Master Protein	P11177	Pyruvate dehydrogenase E1 component subunit beta, mitochondrial OS=Homo sapiens GN=PDHB PE=1 SV=3	0	14.343	15.0418	4	4	4	1	359	39.2	6.65	High		0.668	73	4
TRUE	High	Master Protein	O94979	Protein transport protein Sec31A OS=Homo sapiens GN=SEC31A PE=1 SV=3	0	14.334	6.63934	7	7	7	1	1220	132.9	6.89	High		0.355	63	7
TRUE	High	Master Protein	Q8N1N4	Keratin, type II cytoskeletal 78 OS=Homo sapiens GN=KRT78 PE=2 SV=2	0	14.179	10.3846	6	10	4	1	520	56.8	6.02	High		0.453	171	6
TRUE	High	Master Protein	Q71UM5	40S ribosomal protein S27-like OS=Homo sapiens GN=RPS27L PE=1 SV=3	0	14.047	40.4762	4	7	2	1	84	9.5	9.45	High		14.849	64	4
TRUE	High	Master Protein	Q9Y285	Phenylalanine--tRNA ligase alpha subunit OS=Homo sapiens GN=FARSA PE=1 SV=3	0	13.97	11.4173	4	4	4	1	508	57.5	7.8	High		0.374	100	4
TRUE	High	Master Protein	O95433	Activator of 90 kDa heat shock protein ATPase homolog 1 OS=Homo sapiens GN=AHSA1 PE=1 SV=1	0	13.95	14.497	4	5	4	1	338	38.3	5.53	High		0.616	102	4
TRUE	High	Master Protein	O00303	Eukaryotic translation initiation factor 3 subunit F OS=Homo sapiens GN=EIF3F PE=1 SV=1	0	13.898	17.0868	4	4	4	1	357	37.5	5.45	High		0.719	99	4
TRUE	High	Master Protein	P61923	Coatomer subunit zeta-1 OS=Homo sapiens GN=COPZ1 PE=1 SV=1	0	13.892	27.1186	3	4	3	1	177	20.2	4.81	High		1.683	117	3
TRUE	High	Master Protein	Q9UHD1	Cysteine and histidine-rich domain-containing protein 1 OS=Homo sapiens GN=CHORDC1 PE=1 SV=2	0	13.886	21.3855	4	4	4	1	332	37.5	7.87	High		0.468	48	4
TRUE	High	Master Protein	Q13501	Sequestosome-1 OS=Homo sapiens GN=SQSTM1 PE=1 SV=1	0	13.703	11.1364	4	5	4	1	440	47.7	5.22	High		0.833	61	4
TRUE	High	Master Protein	P06737	Glycogen phosphorylase, liver form OS=Homo sapiens GN=PYGL PE=1 SV=4	0	13.689	6.61157	5	5	5	1	847	97.1	7.17	High		0.22	116	5
TRUE	High	Master Protein	P29401	Transketolase OS=Homo sapiens GN=TKT PE=1 SV=3	0	13.641	11.3965	5	5	5	1	623	67.8	7.66	High		0.377	78	5
TRUE	High	Master Protein	P09382	Galectin-1 OS=Homo sapiens GN=LGALS1 PE=1 SV=2	0	13.547	26.6667	3	5	3	1	135	14.7	5.5	High		1.783	130	3
TRUE	High	Master Protein	P51553	Isocitrate dehydrogenase [NAD] subunit gamma, mitochondrial OS=Homo sapiens GN=IDH3G PE=1 SV=1	0	13.54	9.16031	2	3	2	1	393	42.8	8.5	High		0.468	108	2
TRUE	High	Master Protein	O95347	Structural maintenance of chromosomes protein 2 OS=Homo sapiens GN=SMC2 PE=1 SV=2	0	13.498	5.3467	5	5	5	1	1197	135.6	8.43	High		0.159	68	5
TRUE	High	Master Protein	P48735	Isocitrate dehydrogenase [NADP], mitochondrial OS=Homo sapiens GN=IDH2 PE=1 SV=2	0	13.487	17.2566	6	6	5	1	452	50.9	8.69	High		0.562	85	6
TRUE	High	Master Protein	Q15021	Condensin complex subunit 1 OS=Homo sapiens GN=NCAPD2 PE=1 SV=3	0	13.486	5.56745	6	7	6	1	1401	157.1	6.61	High		0.166	64	6
TRUE	High	Master Protein	P28331	NADH-ubiquinone oxidoreductase 75 kDa subunit, mitochondrial OS=Homo sapiens GN=NDUFS1 PE=1 SV=3	0	13.451	10.0413	5	5	5	1	727	79.4	6.23	High		0.299	69	5
TRUE	High	Master Protein	P40763	Signal transducer and activator of transcription 3 OS=Homo sapiens GN=STAT3 PE=1 SV=2	0	13.421	7.4026	4	4	4	1	770	88	6.3	High		0.216	99	4
TRUE	High	Master Protein	A1L0T0	Acetolactate synthase-like protein OS=Homo sapiens GN=ILVBL PE=1 SV=2	0	13.356	11.8671	4	4	4	1	632	67.8	8.15	High		0.322	74	4
TRUE	High	Master Protein	P62979	Ubiquitin-40S ribosomal protein S27a OS=Homo sapiens GN=RPS27A PE=1 SV=2	0	13.354	27.5641	4	5	4	1	156	18	9.64	High		1.848	98	4
TRUE	High	Master Protein	A0A075B6S5	Immunoglobulin kappa variable 1-27 OS=Homo sapiens GN=IGKV1-27 PE=3 SV=1	0	13.349	13.6752	1	4	1	1	117	12.7	8.29	High		1.154	261	1
TRUE	High	Master Protein	P51812	Ribosomal protein S6 kinase alpha-3 OS=Homo sapiens GN=RPS6KA3 PE=1 SV=1	0	13.222	6.62162	5	6	1	1	740	83.7	6.89	High		0.334	26	5
TRUE	High	Master Protein	Q13435	Splicing factor 3B subunit 2 OS=Homo sapiens GN=SF3B2 PE=1 SV=2	0	13.216	9.27374	5	5	5	1	895	100.2	5.67	High		0.248	68	5
TRUE	High	Master Protein	O60232	Sjoegren syndrome/scleroderma autoantigen 1 OS=Homo sapiens GN=SSSCA1 PE=1 SV=1	0	13.181	37.6884	3	3	3	1	199	21.5	5.24	High		0.995	90	3
TRUE	High	Master Protein	Q3ZCQ8	Mitochondrial import inner membrane translocase subunit TIM50 OS=Homo sapiens GN=TIMM50 PE=1 SV=2	0	13.168	14.4476	4	5	4	1	353	39.6	8.37	High		0.719	112	4
TRUE	High	Master Protein	P42167	Lamina-associated polypeptide 2, isoforms beta/gamma OS=Homo sapiens GN=TMPO PE=1 SV=2	0	13.167	9.2511	3	3	3	1	454	50.6	9.38	High		0.304	86	3
TRUE	High	Master Protein	P15328	Folate receptor alpha OS=Homo sapiens GN=FOLR1 PE=1 SV=3	0	13.136	21.4008	3	3	3	1	257	29.8	7.97	High		0.54	93	3
TRUE	High	Master Protein	A0A0C4DH72	Immunoglobulin kappa variable 1-6 OS=Homo sapiens GN=IGKV1-6 PE=3 SV=1	0	13.1	13.6752	1	5	1	1	117	12.7	8.29	High		0.931	226	1
TRUE	High	Master Protein	P26599	Polypyrimidine tract-binding protein 1 OS=Homo sapiens GN=PTBP1 PE=1 SV=1	0	13.099	11.4878	5	5	5	1	531	57.2	9.17	High		0.585	83	5
TRUE	High	Master Protein	Q8N1F7	Nuclear pore complex protein Nup93 OS=Homo sapiens GN=NUP93 PE=1 SV=2	0	13.096	6.47131	4	4	4	1	819	93.4	5.72	High		0.169	87	4
TRUE	High	Master Protein	P18669	Phosphoglycerate mutase 1 OS=Homo sapiens GN=PGAM1 PE=1 SV=2	0	13.074	16.9291	3	4	3	1	254	28.8	7.18	High		0.848	75	3
TRUE	High	Master Protein	P57088	Transmembrane protein 33 OS=Homo sapiens GN=TMEM33 PE=1 SV=2	0	12.998	14.5749	3	6	3	1	247	28	9.7	High		1.154	105	3
TRUE	High	Master Protein	Q01844	RNA-binding protein EWS OS=Homo sapiens GN=EWSR1 PE=1 SV=1	0	12.943	7.31707	3	3	3	1	656	68.4	9.33	High		0.35	91	3
TRUE	High	Master Protein	P02765	Alpha-2-HS-glycoprotein OS=Homo sapiens GN=AHSG PE=1 SV=1	0	12.81	5.44959	3	7	3	1	367	39.3	5.72	High		0.468	148	3
TRUE	High	Master Protein	Q9P289	Serine/threonine-protein kinase 26 OS=Homo sapiens GN=STK26 PE=1 SV=2	0	12.799	13.7019	4	4	4	1	416	46.5	5.29	High		0.445	104	4
TRUE	High	Master Protein	P62899	60S ribosomal protein L31 OS=Homo sapiens GN=RPL31 PE=1 SV=1	0	12.753	31.2	4	7	4	1	125	14.5	10.54	High		4.179	134	4
TRUE	High	Master Protein	Q13428	Treacle protein OS=Homo sapiens GN=TCOF1 PE=1 SV=3	0	12.735	2.35215	4	4	4	1	1488	152	9.04	High	Phospho [S1350(100)]	0.117	86	4
TRUE	High	Master Protein	Q8NF37	Lysophosphatidylcholine acyltransferase 1 OS=Homo sapiens GN=LPCAT1 PE=1 SV=2	0	12.708	10.1124	4	4	4	1	534	59.1	6.02	High		0.407	76	4
TRUE	High	Master Protein	P01116	GTPase KRas OS=Homo sapiens GN=KRAS PE=1 SV=1	0	12.704	30.6878	4	4	4	1	189	21.6	6.77	High		1.31	65	4
TRUE	High	Master Protein	Q16527	Cysteine and glycine-rich protein 2 OS=Homo sapiens GN=CSRP2 PE=1 SV=3	0	12.703	25.3886	3	4	3	1	193	20.9	8.62	High		1.031	51	3
TRUE	High	Master Protein	Q9NVI7	ATPase family AAA domain-containing protein 3A OS=Homo sapiens GN=ATAD3A PE=1 SV=2	0	12.702	6.30915	3	4	1	1	634	71.3	8.98	High		0.166	90	3
TRUE	High	Master Protein	P06454	Prothymosin alpha OS=Homo sapiens GN=PTMA PE=1 SV=2	0	12.674	12.6126	2	3	2	1	111	12.2	3.78	High		9	100	2
TRUE	High	Master Protein	Q99536	Synaptic vesicle membrane protein VAT-1 homolog OS=Homo sapiens GN=VAT1 PE=1 SV=2	0	12.627	10.4326	3	3	3	1	393	41.9	6.29	High		0.438	75	3
TRUE	High	Master Protein	P60953	Cell division control protein 42 homolog OS=Homo sapiens GN=CDC42 PE=1 SV=2	0	12.61	27.7487	4	5	3	1	191	21.2	6.55	High		2.162	80	4
TRUE	High	Master Protein	O43592	Exportin-T OS=Homo sapiens GN=XPOT PE=1 SV=2	0	12.586	3.5343	3	3	3	1	962	109.9	5.39	High		0.158	97	3
TRUE	High	Master Protein	Q969S3	Zinc finger protein 622 OS=Homo sapiens GN=ZNF622 PE=1 SV=1	0	12.576	10.2725	4	4	4	1	477	54.2	6.15	High		0.374	65	4
TRUE	High	Master Protein	O60762	Dolichol-phosphate mannosyltransferase subunit 1 OS=Homo sapiens GN=DPM1 PE=1 SV=1	0	12.537	17.3077	3	3	3	1	260	29.6	9.57	High		0.468	91	3
TRUE	High	Master Protein	P61006	Ras-related protein Rab-8A OS=Homo sapiens GN=RAB8A PE=1 SV=1	0	12.515	23.6715	5	8	1	1	207	23.7	9.07	High		0.968	166	5
TRUE	High	Master Protein	Q9UI30	Multifunctional methyltransferase subunit TRM112-like protein OS=Homo sapiens GN=TRMT112 PE=1 SV=1	0	12.514	32.8	3	3	3	1	125	14.2	5.26	High		1.154	92	3
TRUE	High	Master Protein	Q9BWM7	Sideroflexin-3 OS=Homo sapiens GN=SFXN3 PE=1 SV=3	0	12.46	11.5265	3	4	3	1	321	35.5	9.1	High		0.389	107	3
TRUE	High	Master Protein	Q15382	GTP-binding protein Rheb OS=Homo sapiens GN=RHEB PE=1 SV=1	0	12.454	32.0652	5	5	5	1	184	20.5	5.92	High		1.61	56	5
TRUE	High	Master Protein	Q92538	Golgi-specific brefeldin A-resistance guanine nucleotide exchange factor 1 OS=Homo sapiens GN=GBF1 PE=1 SV=2	0	12.39	3.33513	5	8	5	1	1859	206.3	5.73	High		0.11	55	5
TRUE	High	Master Protein	P52943	Cysteine-rich protein 2 OS=Homo sapiens GN=CRIP2 PE=1 SV=1	0	12.39	32.2115	3	4	3	1	208	22.5	8.72	High		0.874	94	3
TRUE	High	Master Protein	Q9UBE0	SUMO-activating enzyme subunit 1 OS=Homo sapiens GN=SAE1 PE=1 SV=1	0	12.34	8.67052	3	4	3	1	346	38.4	5.3	High		0.492	80	3
TRUE	High	Master Protein	Q9BY42	Protein RTF2 homolog OS=Homo sapiens GN=RTFDC1 PE=1 SV=3	0	12.275	16.3399	4	4	4	1	306	33.9	8.59	High		0.585	93	4
TRUE	High	Master Protein	P09972	Fructose-bisphosphate aldolase C OS=Homo sapiens GN=ALDOC PE=1 SV=2	0	12.267	16.7582	4	5	2	1	364	39.4	6.87	High		0.492	131	4
TRUE	High	Master Protein	P22314	Ubiquitin-like modifier-activating enzyme 1 OS=Homo sapiens GN=UBA1 PE=1 SV=3	0	12.2	4.7259	3	3	3	1	1058	117.8	5.76	High		0.122	101	3
TRUE	High	Master Protein	Q15003	Condensin complex subunit 2 OS=Homo sapiens GN=NCAPH PE=1 SV=3	0	12.172	6.34278	3	3	3	1	741	82.5	5.06	High		0.199	83	3
TRUE	High	Master Protein	Q9NVI1	Fanconi anemia group I protein OS=Homo sapiens GN=FANCI PE=1 SV=4	0	12.117	2.93675	4	4	4	1	1328	149.2	6.74	High		0.112	86	4
TRUE	High	Master Protein	P35659	Protein DEK OS=Homo sapiens GN=DEK PE=1 SV=1	0	12.113	10.4	4	6	4	1	375	42.6	8.56	High		0.616	150	4
TRUE	High	Master Protein	Q8TC12	Retinol dehydrogenase 11 OS=Homo sapiens GN=RDH11 PE=1 SV=2	0	12.075	15.7233	4	4	4	1	318	35.4	8.82	High		0.551	93	4
TRUE	High	Master Protein	O15260	Surfeit locus protein 4 OS=Homo sapiens GN=SURF4 PE=1 SV=3	0	11.894	11.5242	3	5	3	1	269	30.4	7.78	High		1.154	153	3
TRUE	High	Master Protein	P36507	Dual specificity mitogen-activated protein kinase kinase 2 OS=Homo sapiens GN=MAP2K2 PE=1 SV=1	0	11.887	13.75	5	5	3	1	400	44.4	6.55	High		0.73	83	5
TRUE	High	Master Protein	P01624	Immunoglobulin kappa variable 3-15 OS=Homo sapiens GN=IGKV3-15 PE=1 SV=2	0	11.877	26.087	2	3	2	1	115	12.5	5.19	High		1.154	95	2
TRUE	High	Master Protein	P62195	26S protease regulatory subunit 8 OS=Homo sapiens GN=PSMC5 PE=1 SV=1	0	11.87	12.5616	3	3	3	1	406	45.6	7.55	High		0.28	96	3
TRUE	High	Master Protein	P06748	Nucleophosmin OS=Homo sapiens GN=NPM1 PE=1 SV=2	0	11.797	10.2041	3	3	3	1	294	32.6	4.78	High		0.468	71	3
TRUE	High	Master Protein	Q99623	Prohibitin-2 OS=Homo sapiens GN=PHB2 PE=1 SV=2	0	11.763	13.0435	3	3	3	1	299	33.3	9.83	High		0.304	84	3
TRUE	High	Master Protein	Q9Y265	RuvB-like 1 OS=Homo sapiens GN=RUVBL1 PE=1 SV=1	0	11.735	12.7193	4	5	4	1	456	50.2	6.42	High		0.468	97	4
TRUE	High	Master Protein	P49207	60S ribosomal protein L34 OS=Homo sapiens GN=RPL34 PE=1 SV=3	0	11.603	23.9316	4	8	4	1	117	13.3	11.47	High		5.813	136	4
TRUE	High	Master Protein	P08574	Cytochrome c1, heme protein, mitochondrial OS=Homo sapiens GN=CYC1 PE=1 SV=3	0	11.548	11.0769	3	4	3	1	325	35.4	9	High		0.624	46	3
TRUE	High	Master Protein	Q96FW1	Ubiquitin thioesterase OTUB1 OS=Homo sapiens GN=OTUB1 PE=1 SV=2	0	11.537	16.2362	3	3	3	1	271	31.3	4.94	High		0.585	45	3
TRUE	High	Master Protein	P31040	Succinate dehydrogenase [ubiquinone] flavoprotein subunit, mitochondrial OS=Homo sapiens GN=SDHA PE=1 SV=2	0	11.519	9.63855	5	5	5	1	664	72.6	7.39	High		0.365	55	5
TRUE	High	Master Protein	A0A087WW87	Immunoglobulin kappa variable 2-40 OS=Homo sapiens GN=IGKV2-40 PE=3 SV=2	0	11.353	16.5289	2	6	1	1	121	13.3	4.61	High		2.981	166	2
TRUE	High	Master Protein	P28838	Cytosol aminopeptidase OS=Homo sapiens GN=LAP3 PE=1 SV=3	0	11.316	10.2119	4	4	4	1	519	56.1	7.93	High		0.292	83	4
TRUE	High	Master Protein	P11908	Ribose-phosphate pyrophosphokinase 2 OS=Homo sapiens GN=PRPS2 PE=1 SV=2	0	11.232	11.6352	3	4	2	1	318	34.7	6.61	High		0.438	112	3
TRUE	High	Master Protein	Q15165	Serum paraoxonase/arylesterase 2 OS=Homo sapiens GN=PON2 PE=1 SV=3	0	11.196	18.6441	3	3	3	1	354	39.4	5.6	High		0.501	40	3
TRUE	High	Master Protein	Q8NBX0	Saccharopine dehydrogenase-like oxidoreductase OS=Homo sapiens GN=SCCPDH PE=1 SV=1	0	11.079	11.655	4	4	4	1	429	47.1	9.14	High		0.492	69	4
TRUE	High	Master Protein	Q9Y4W6	AFG3-like protein 2 OS=Homo sapiens GN=AFG3L2 PE=1 SV=2	0	11.043	6.399	5	5	5	1	797	88.5	8.66	High		0.238	78	5
TRUE	High	Master Protein	P22087	rRNA 2'-O-methyltransferase fibrillarin OS=Homo sapiens GN=FBL PE=1 SV=2	0	11.026	14.3302	3	3	3	1	321	33.8	10.18	High		0.35	29	3
TRUE	High	Master Protein	P62861	40S ribosomal protein S30 OS=Homo sapiens GN=FAU PE=1 SV=1	0	10.928	20.339	3	7	3	1	59	6.6	12.15	High		20.544	113	3
TRUE	High	Master Protein	Q6P996	Pyridoxal-dependent decarboxylase domain-containing protein 1 OS=Homo sapiens GN=PDXDC1 PE=1 SV=2	0	10.927	10.0254	6	6	6	1	788	86.7	5.38	High		0.359	70	6
TRUE	High	Master Protein	P13995	Bifunctional methylenetetrahydrofolate dehydrogenase/cyclohydrolase, mitochondrial OS=Homo sapiens GN=MTHFD2 PE=1 SV=2	0	10.876	9.42857	2	3	2	1	350	37.9	8.73	High		0.369	55	2
TRUE	High	Master Protein	Q9Y4X5	E3 ubiquitin-protein ligase ARIH1 OS=Homo sapiens GN=ARIH1 PE=1 SV=2	0	10.875	5.9246	3	4	3	1	557	64.1	5.08	High		0.374	82	3
TRUE	High	Master Protein	Q8N1G4	Leucine-rich repeat-containing protein 47 OS=Homo sapiens GN=LRRC47 PE=1 SV=1	0	10.839	6.00343	3	3	3	1	583	63.4	8.28	High		0.218	49	3
TRUE	High	Master Protein	P37108	Signal recognition particle 14 kDa protein OS=Homo sapiens GN=SRP14 PE=1 SV=2	0	10.8	36.7647	3	5	3	1	136	14.6	10.04	High		2.162	119	3
TRUE	High	Master Protein	P35232	Prohibitin OS=Homo sapiens GN=PHB PE=1 SV=1	0	10.798	11.3971	2	2	2	1	272	29.8	5.76	High		0.292	102	2
TRUE	High	Master Protein	P40926	Malate dehydrogenase, mitochondrial OS=Homo sapiens GN=MDH2 PE=1 SV=3	0	10.711	15.0888	4	4	4	1	338	35.5	8.68	High		0.445	46	4
TRUE	High	Master Protein	P52907	F-actin-capping protein subunit alpha-1 OS=Homo sapiens GN=CAPZA1 PE=1 SV=3	0	10.692	20.6294	4	4	4	1	286	32.9	5.69	High		0.778	68	4
TRUE	High	Master Protein	Q08211	ATP-dependent RNA helicase A OS=Homo sapiens GN=DHX9 PE=1 SV=4	0	10.67	3.14961	4	4	4	1	1270	140.9	6.84	High		0.125	71	4
TRUE	High	Master Protein	P11166	Solute carrier family 2, facilitated glucose transporter member 1 OS=Homo sapiens GN=SLC2A1 PE=1 SV=2	0	10.595	5.4878	2	3	2	1	492	54	8.72	High		0.311	79	2
TRUE	High	Master Protein	Q9ULX3	RNA-binding protein NOB1 OS=Homo sapiens GN=NOB1 PE=1 SV=1	0	10.503	12.3786	4	4	4	1	412	46.6	7.18	High		0.445	62	4
TRUE	High	Master Protein	Q9UIA9	Exportin-7 OS=Homo sapiens GN=XPO7 PE=1 SV=3	0	10.498	3.95584	3	3	3	1	1087	123.8	6.32	High		0.114	57	3
TRUE	High	Master Protein	Q9Y5L0	Transportin-3 OS=Homo sapiens GN=TNPO3 PE=1 SV=3	0	10.477	4.65872	3	3	3	1	923	104.1	5.57	High		0.151	41	3
TRUE	High	Master Protein	Q04837	Single-stranded DNA-binding protein, mitochondrial OS=Homo sapiens GN=SSBP1 PE=1 SV=1	0	10.454	18.9189	2	3	2	1	148	17.2	9.6	High		0.52	62	2
TRUE	High	Master Protein	P42224	Signal transducer and activator of transcription 1-alpha/beta OS=Homo sapiens GN=STAT1 PE=1 SV=2	0	10.387	5.06667	3	3	3	1	750	87.3	6.05	High		0.162	64	3
TRUE	High	Master Protein	P52789	Hexokinase-2 OS=Homo sapiens GN=HK2 PE=1 SV=2	0	10.337	5.34351	4	4	3	1	917	102.3	6.05	High		0.19	54	4
TRUE	High	Master Protein	Q9NX20	39S ribosomal protein L16, mitochondrial OS=Homo sapiens GN=MRPL16 PE=1 SV=1	0	10.278	19.9203	3	3	3	1	251	28.4	10.13	High		0.585	63	3
TRUE	High	Master Protein	P05387	60S acidic ribosomal protein P2 OS=Homo sapiens GN=RPLP2 PE=1 SV=1	0	10.267	42.6087	2	3	2	1	115	11.7	4.54	High		2.162	71	2
TRUE	High	Master Protein	P53582	Methionine aminopeptidase 1 OS=Homo sapiens GN=METAP1 PE=1 SV=2	0	10.256	13.7306	3	3	3	1	386	43.2	7.17	High		0.35	68	3
TRUE	High	Master Protein	P11802	Cyclin-dependent kinase 4 OS=Homo sapiens GN=CDK4 PE=1 SV=2	0	10.233	15.8416	4	4	3	1	303	33.7	7.01	High		0.585	52	4
TRUE	High	Master Protein	Q9P2R7	Succinate--CoA ligase [ADP-forming] subunit beta, mitochondrial OS=Homo sapiens GN=SUCLA2 PE=1 SV=3	0	10.205	6.47948	3	3	3	1	463	50.3	7.42	High		0.269	72	3
TRUE	High	Master Protein	Q99613	Eukaryotic translation initiation factor 3 subunit C OS=Homo sapiens GN=EIF3C PE=1 SV=1	0	10.169	5.25739	5	5	5	1	913	105.3	5.68	High		0.271	72	5
TRUE	High	Master Protein	P31947	14-3-3 protein sigma OS=Homo sapiens GN=SFN PE=1 SV=1	0	10.129	16.9355	3	5	1	1	248	27.8	4.74	High		0.468	91	3
TRUE	High	Master Protein	P62258	14-3-3 protein epsilon OS=Homo sapiens GN=YWHAE PE=1 SV=1	0	10.071	14.902	3	5	2	1	255	29.2	4.74	High		0.668	95	3
TRUE	High	Master Protein	P11234	Ras-related protein Ral-B OS=Homo sapiens GN=RALB PE=1 SV=1	0	10.062	15.534	3	4	3	1	206	23.4	6.62	High		0.995	111	3
TRUE	High	Master Protein	Q09028	Histone-binding protein RBBP4 OS=Homo sapiens GN=RBBP4 PE=1 SV=3	0	10.04	19.2941	5	7	2	1	425	47.6	4.89	High		0.778	105	5
TRUE	High	Master Protein	Q5T9A4	ATPase family AAA domain-containing protein 3B OS=Homo sapiens GN=ATAD3B PE=1 SV=1	0	10.022	5.55556	3	4	1	1	648	72.5	9.2	High		0.17	86	3
TRUE	High	Master Protein	Q99733	Nucleosome assembly protein 1-like 4 OS=Homo sapiens GN=NAP1L4 PE=1 SV=1	0	9.982	10.6667	4	4	3	1	375	42.8	4.69	High		0.585	70	4
TRUE	High	Master Protein	Q15654	Thyroid receptor-interacting protein 6 OS=Homo sapiens GN=TRIP6 PE=1 SV=3	0	9.964	7.35294	2	2	2	1	476	50.3	7.37	High		0.179	45	2
TRUE	High	Master Protein	Q9Y570	Protein phosphatase methylesterase 1 OS=Homo sapiens GN=PPME1 PE=1 SV=3	0	9.936	15.8031	4	5	4	1	386	42.3	5.97	High		0.688	62	4
TRUE	High	Master Protein	P08758	Annexin A5 OS=Homo sapiens GN=ANXA5 PE=1 SV=2	0	9.888	9.6875	3	4	3	1	320	35.9	5.05	High		0.425	56	3
TRUE	High	Master Protein	P19474	E3 ubiquitin-protein ligase TRIM21 OS=Homo sapiens GN=TRIM21 PE=1 SV=1	0	9.853	9.68421	4	4	4	1	475	54.1	6.38	High		0.346	78	4
TRUE	High	Master Protein	Q9BPX3	Condensin complex subunit 3 OS=Homo sapiens GN=NCAPG PE=1 SV=1	0	9.806	3.74384	3	3	3	1	1015	114.3	5.59	High		0.131	74	3
TRUE	High	Master Protein	Q9GZT3	SRA stem-loop-interacting RNA-binding protein, mitochondrial OS=Homo sapiens GN=SLIRP PE=1 SV=1	0	9.804	25.6881	2	3	2	1	109	12.3	10.24	High		0.52	55	2
TRUE	High	Master Protein	Q14181	DNA polymerase alpha subunit B OS=Homo sapiens GN=POLA2 PE=1 SV=2	0	9.776	6.68896	3	3	3	1	598	65.9	5.24	High		0.292	71	3
TRUE	High	Master Protein	A0FGR8	Extended synaptotagmin-2 OS=Homo sapiens GN=ESYT2 PE=1 SV=1	0	9.75	4.23453	4	4	4	1	921	102.3	9.26	High		0.186	70	4
TRUE	High	Master Protein	Q8TB03	Uncharacterized protein CXorf38 OS=Homo sapiens GN=CXorf38 PE=1 SV=1	0	9.713	14.1066	4	4	4	1	319	36.6	6.3	High		0.52	77	4
TRUE	High	Master Protein	P21796	Voltage-dependent anion-selective channel protein 1 OS=Homo sapiens GN=VDAC1 PE=1 SV=2	0	9.701	14.841	3	4	2	1	283	30.8	8.54	High		0.468	115	3
TRUE	High	Master Protein	Q9Y6K5	2'-5'-oligoadenylate synthase 3 OS=Homo sapiens GN=OAS3 PE=1 SV=3	0	9.698	3.12787	3	4	3	1	1087	121.1	8.4	High		0.169	61	3
TRUE	High	Master Protein	P07954	Fumarate hydratase, mitochondrial OS=Homo sapiens GN=FH PE=1 SV=3	0	9.674	7.64706	2	2	2	1	510	54.6	8.76	High		0.15	77	2
TRUE	High	Master Protein	P30044	Peroxiredoxin-5, mitochondrial OS=Homo sapiens GN=PRDX5 PE=1 SV=4	0	9.673	23.8318	3	4	3	1	214	22.1	8.7	High		0.701	78	3
TRUE	High	Master Protein	Q13671	Ras and Rab interactor 1 OS=Homo sapiens GN=RIN1 PE=1 SV=4	0	9.672	8.04598	4	4	4	1	783	84	8.02	High		0.252	76	4
TRUE	High	Master Protein	Q92888	Rho guanine nucleotide exchange factor 1 OS=Homo sapiens GN=ARHGEF1 PE=1 SV=2	0	9.661	3.28947	2	2	2	1	912	102.4	5.66	High		0.094	39	2
TRUE	High	Master Protein	Q5K651	Sterile alpha motif domain-containing protein 9 OS=Homo sapiens GN=SAMD9 PE=1 SV=1	0	9.616	2.64317	3	3	3	1	1589	184.2	7.83	High		0.076	86	3
TRUE	High	Master Protein	Q69YN2	CWF19-like protein 1 OS=Homo sapiens GN=CWF19L1 PE=1 SV=2	0	9.575	5.57621	2	2	2	1	538	60.6	7.24	High		0.145	60	2
TRUE	High	Master Protein	Q9UG63	ATP-binding cassette sub-family F member 2 OS=Homo sapiens GN=ABCF2 PE=1 SV=2	0	9.549	4.97592	3	3	3	1	623	71.2	7.37	High		0.205	83	3
TRUE	High	Master Protein	P23258	Tubulin gamma-1 chain OS=Homo sapiens GN=TUBG1 PE=1 SV=2	0	9.521	5.32151	2	2	2	1	451	51.1	6.14	High		0.233	66	2
TRUE	High	Master Protein	Q969Q0	60S ribosomal protein L36a-like OS=Homo sapiens GN=RPL36AL PE=1 SV=3	0	9.509	25.4717	3	5	3	1	106	12.5	10.65	High		3.642	74	3
TRUE	High	Master Protein	Q15286	Ras-related protein Rab-35 OS=Homo sapiens GN=RAB35 PE=1 SV=1	0	9.463	15.4229	3	5	1	1	201	23	8.29	High		0.585	133	3
TRUE	High	Master Protein	Q01130	Serine/arginine-rich splicing factor 2 OS=Homo sapiens GN=SRSF2 PE=1 SV=4	0	9.369	14.4796	3	4	3	1	221	25.5	11.85	High		0.874	104	3
TRUE	High	Master Protein	P00533	Epidermal growth factor receptor OS=Homo sapiens GN=EGFR PE=1 SV=2	0	9.362	3.38843	3	3	3	1	1210	134.2	6.68	High		0.102	84	3
TRUE	High	Master Protein	P60468	Protein transport protein Sec61 subunit beta OS=Homo sapiens GN=SEC61B PE=1 SV=2	0	9.335	37.5	3	3	3	1	96	10	11.56	High		2.162	71	3
TRUE	High	Master Protein	Q14318	Peptidyl-prolyl cis-trans isomerase FKBP8 OS=Homo sapiens GN=FKBP8 PE=1 SV=2	0	9.278	9.2233	3	3	3	1	412	44.5	4.84	High		0.389	65	3
TRUE	High	Master Protein	Q13045	Protein flightless-1 homolog OS=Homo sapiens GN=FLII PE=1 SV=2	0	9.254	2.60047	3	3	3	1	1269	144.7	6.05	High		0.098	92	3
TRUE	High	Master Protein	Q13835	Plakophilin-1 OS=Homo sapiens GN=PKP1 PE=1 SV=2	0	9.236	3.48059	2	3	2	1	747	82.8	9.13	High		0.087	119	2
TRUE	High	Master Protein	Q6KB66	Keratin, type II cytoskeletal 80 OS=Homo sapiens GN=KRT80 PE=1 SV=2	0	9.037	3.9823	2	11	1	1	452	50.5	5.67	High		0.218	317	2
TRUE	High	Master Protein	P05187	Alkaline phosphatase, placental type OS=Homo sapiens GN=ALPP PE=1 SV=2	0	8.972	7.1028	3	3	3	1	535	57.9	6.29	High		0.259	49	3
TRUE	High	Master Protein	Q9NRW3	DNA dC->dU-editing enzyme APOBEC-3C OS=Homo sapiens GN=APOBEC3C PE=1 SV=2	0	8.948	6.84211	1	2	1	1	190	22.8	7.59	High		0.468	46	1
TRUE	High	Master Protein	O14818	Proteasome subunit alpha type-7 OS=Homo sapiens GN=PSMA7 PE=1 SV=1	0	8.903	14.9194	3	3	3	1	248	27.9	8.46	High		0.54	56	3
TRUE	High	Master Protein	P18077	60S ribosomal protein L35a OS=Homo sapiens GN=RPL35A PE=1 SV=2	0	8.897	21.8182	3	6	3	1	110	12.5	11.06	High		1.783	113	3
TRUE	High	Master Protein	Q5JVF3	PCI domain-containing protein 2 OS=Homo sapiens GN=PCID2 PE=1 SV=2	0	8.893	11.5288	4	4	4	1	399	46	8.53	High		0.346	35	4
TRUE	High	Master Protein	P01593	Immunoglobulin kappa variable 1D-33 OS=Homo sapiens GN=IGKV1D-33 PE=1 SV=2	0	8.859	13.6752	1	1	1	1	117	12.8	4.78	High		0.585	110	1
TRUE	High	Master Protein	Q9Y6E2	Basic leucine zipper and W2 domain-containing protein 2 OS=Homo sapiens GN=BZW2 PE=1 SV=1	0	8.817	10.0239	6	7	3	1	419	48.1	6.68	High		0.562	87	6
TRUE	High	Master Protein	P37802	Transgelin-2 OS=Homo sapiens GN=TAGLN2 PE=1 SV=3	0	8.799	22.1106	4	5	4	1	199	22.4	8.25	High		0.931	68	4
TRUE	High	Master Protein	P61026	Ras-related protein Rab-10 OS=Homo sapiens GN=RAB10 PE=1 SV=1	0	8.794	20.5	4	6	1	1	200	22.5	8.38	High		0.719	121	4
TRUE	High	Master Protein	O75477	Erlin-1 OS=Homo sapiens GN=ERLIN1 PE=1 SV=1	0	8.779	6.35838	2	3	2	1	346	38.9	7.87	High		0.334	69	2
TRUE	High	Master Protein	Q9NZ45	CDGSH iron-sulfur domain-containing protein 1 OS=Homo sapiens GN=CISD1 PE=1 SV=1	0	8.756	13.8889	1	2	1	1	108	12.2	9.09	High		1.154	80	1
TRUE	High	Master Protein	A0A075B6I0	Immunoglobulin lambda variable 8-61 OS=Homo sapiens GN=IGLV8-61 PE=3 SV=7	0	8.669	20.4918	3	5	3	1	122	12.8	4.55	High		4.623	76	3
TRUE	High	Master Protein	P33176	Kinesin-1 heavy chain OS=Homo sapiens GN=KIF5B PE=1 SV=1	0	8.639	3.53063	3	3	3	1	963	109.6	6.51	High		0.114	52	3
TRUE	High	Master Protein	Q9NT62	Ubiquitin-like-conjugating enzyme ATG3 OS=Homo sapiens GN=ATG3 PE=1 SV=1	0	8.638	8.28025	2	2	2	1	314	35.8	4.74	High		0.274	94	2
TRUE	High	Master Protein	O95163	Elongator complex protein 1 OS=Homo sapiens GN=IKBKAP PE=1 SV=3	0	8.622	3.3033	3	3	3	1	1332	150.2	5.94	High		0.104	44	3
TRUE	High	Master Protein	P47756	F-actin-capping protein subunit beta OS=Homo sapiens GN=CAPZB PE=1 SV=4	0	8.594	19.1336	4	4	4	1	277	31.3	5.59	High		0.585	44	4
TRUE	High	Master Protein	Q8TF66	Leucine-rich repeat-containing protein 15 OS=Homo sapiens GN=LRRC15 PE=2 SV=2	0	8.587	5.67986	4	4	4	1	581	64.3	6.71	High		0.425	28	4
TRUE	High	Master Protein	Q9BZX2	Uridine-cytidine kinase 2 OS=Homo sapiens GN=UCK2 PE=1 SV=1	0	8.552	16.092	3	3	3	1	261	29.3	6.7	High		0.54	60	3
TRUE	High	Master Protein	Q13616	Cullin-1 OS=Homo sapiens GN=CUL1 PE=1 SV=2	0	8.551	2.70619	2	2	2	1	776	89.6	8	High		0.089	80	2
TRUE	High	Master Protein	P06310	Immunoglobulin kappa variable 2-30 OS=Homo sapiens GN=IGKV2-30 PE=3 SV=2	0	8.536	16.6667	2	4	1	1	120	13.2	8.51	High		1.512	157	2
TRUE	High	Master Protein	Q9BXW7	Cat eye syndrome critical region protein 5 OS=Homo sapiens GN=CECR5 PE=1 SV=1	0	8.523	6.14657	2	2	2	1	423	46.3	8.13	High		0.222	54	2
TRUE	High	Master Protein	Q9HD45	Transmembrane 9 superfamily member 3 OS=Homo sapiens GN=TM9SF3 PE=1 SV=2	0	8.522	4.41426	1	1	1	1	589	67.8	7.21	High		0.093	55	1
TRUE	High	Master Protein	P48059	LIM and senescent cell antigen-like-containing domain protein 1 OS=Homo sapiens GN=LIMS1 PE=1 SV=4	0	8.503	8.30769	2	2	2	1	325	37.2	8.05	High		0.233	57	2
TRUE	High	Master Protein	P11310	Medium-chain specific acyl-CoA dehydrogenase, mitochondrial OS=Homo sapiens GN=ACADM PE=1 SV=1	0	8.448	8.07601	3	3	3	1	421	46.6	8.37	High		0.369	35	3
TRUE	High	Master Protein	Q15477	Helicase SKI2W OS=Homo sapiens GN=SKIV2L PE=1 SV=3	0	8.445	2.88925	2	2	2	1	1246	137.7	6.06	High		0.069	47	2
TRUE	High	Master Protein	Q9H061	Transmembrane protein 126A OS=Homo sapiens GN=TMEM126A PE=1 SV=1	0	8.435	18.4615	3	4	3	1	195	21.5	9.26	High		1.154	59	3
TRUE	High	Master Protein	O43813	LanC-like protein 1 OS=Homo sapiens GN=LANCL1 PE=1 SV=1	0	8.394	9.02256	4	4	4	1	399	45.3	7.75	High		0.52	50	4
TRUE	High	Master Protein	Q5VYK3	Proteasome-associated protein ECM29 homolog OS=Homo sapiens GN=ECM29 PE=1 SV=2	0	8.389	3.84824	6	6	6	1	1845	204.2	7.12	High		0.133	24	6
TRUE	High	Master Protein	P05204	Non-histone chromosomal protein HMG-17 OS=Homo sapiens GN=HMGN2 PE=1 SV=3	0	8.333	16.6667	1	2	1	1	90	9.4	9.99	High		1.512	42	1
TRUE	High	Master Protein	Q92614	Unconventional myosin-XVIIIa OS=Homo sapiens GN=MYO18A PE=1 SV=3	0	8.328	2.28822	4	4	4	1	2054	233	6.3	High		0.07	21	4
TRUE	High	Master Protein	P31939	Bifunctional purine biosynthesis protein PURH OS=Homo sapiens GN=ATIC PE=1 SV=3	0	8.291	9.12162	4	4	4	1	592	64.6	6.71	High		0.283	53	4
TRUE	High	Master Protein	P63167	Dynein light chain 1, cytoplasmic OS=Homo sapiens GN=DYNLL1 PE=1 SV=1	0	8.283	26.9663	3	4	3	1	89	10.4	7.4	High		2.981	60	3
TRUE	High	Master Protein	Q07065	Cytoskeleton-associated protein 4 OS=Homo sapiens GN=CKAP4 PE=1 SV=2	0	8.255	5.81395	3	3	3	1	602	66	5.92	High		0.158	90	3
TRUE	High	Master Protein	Q9P035	Very-long-chain (3R)-3-hydroxyacyl-CoA dehydratase 3 OS=Homo sapiens GN=HACD3 PE=1 SV=2	0	8.252	12.9834	3	3	3	1	362	43.1	8.94	High		0.468	36	3
TRUE	High	Master Protein	Q68E01	Integrator complex subunit 3 OS=Homo sapiens GN=INTS3 PE=1 SV=1	0	8.243	1.62991	1	1	1	1	1043	118	5.8	High		0.041	82	1
TRUE	High	Master Protein	P07910	Heterogeneous nuclear ribonucleoproteins C1/C2 OS=Homo sapiens GN=HNRNPC PE=1 SV=4	0	8.207	10.7843	3	3	3	1	306	33.7	5.08	High		0.35	70	3
TRUE	High	Master Protein	Q13151	Heterogeneous nuclear ribonucleoprotein A0 OS=Homo sapiens GN=HNRNPA0 PE=1 SV=1	0	8.2	14.4262	3	3	3	1	305	30.8	9.29	High		0.585	77	3
TRUE	High	Master Protein	Q9NPQ8	Synembryn-A OS=Homo sapiens GN=RIC8A PE=1 SV=3	0	8.148	6.21469	4	4	3	1	531	59.7	5.33	High		0.322	48	4
TRUE	High	Master Protein	Q15942	Zyxin OS=Homo sapiens GN=ZYX PE=1 SV=1	0	8.143	7.16783	3	3	3	1	572	61.2	6.67	High		0.35	58	3
TRUE	High	Master Protein	P43686	26S protease regulatory subunit 6B OS=Homo sapiens GN=PSMC4 PE=1 SV=2	0	8.072	11.4833	3	3	3	1	418	47.3	5.21	High		0.318	45	3
TRUE	High	Master Protein	Q6DD88	Atlastin-3 OS=Homo sapiens GN=ATL3 PE=1 SV=1	0	8.036	7.02403	3	3	3	1	541	60.5	5.66	High		0.259	49	3
TRUE	High	Master Protein	P55884	Eukaryotic translation initiation factor 3 subunit B OS=Homo sapiens GN=EIF3B PE=1 SV=3	0	8.031	3.31695	2	2	2	1	814	92.4	5	High		0.116	87	2
TRUE	High	Master Protein	P04183	Thymidine kinase, cytosolic OS=Homo sapiens GN=TK1 PE=1 SV=2	0	8.025	18.3761	3	3	3	1	234	25.5	8.51	High		0.54	59	3
TRUE	High	Master Protein	A0A075B6S2	Immunoglobulin kappa variable 2D-29 OS=Homo sapiens GN=IGKV2D-29 PE=3 SV=1	0	7.99	16.6667	2	3	1	1	120	13.1	7.12	High		1.154	151	2
TRUE	High	Master Protein	Q00610	Clathrin heavy chain 1 OS=Homo sapiens GN=CLTC PE=1 SV=5	0	7.938	1.79104	2	2	2	1	1675	191.5	5.69	High		0.05	91	2
TRUE	High	Master Protein	P40938	Replication factor C subunit 3 OS=Homo sapiens GN=RFC3 PE=1 SV=2	0	7.893	12.6404	3	3	3	1	356	40.5	8.34	High		0.292	53	3
TRUE	High	Master Protein	P43897	Elongation factor Ts, mitochondrial OS=Homo sapiens GN=TSFM PE=1 SV=2	0	7.891	15.3846	3	3	3	1	325	35.4	8.38	High		0.413	47	3
TRUE	High	Master Protein	P06312	Immunoglobulin kappa variable 4-1 OS=Homo sapiens GN=IGKV4-1 PE=1 SV=1	0	7.885	17.3554	2	4	2	1	121	13.4	5.25	High		0.931	132	2
TRUE	High	Master Protein	Q52LJ0	Protein FAM98B OS=Homo sapiens GN=FAM98B PE=1 SV=1	0	7.878	7.87879	2	2	2	1	330	37.2	6.29	High		0.259	80	2
TRUE	High	Master Protein	Q9GZZ9	Ubiquitin-like modifier-activating enzyme 5 OS=Homo sapiens GN=UBA5 PE=1 SV=1	0	7.873	14.1089	3	3	3	1	404	44.8	4.84	High		0.389	51	3
TRUE	High	Master Protein	P01701	Immunoglobulin lambda variable 1-51 OS=Homo sapiens GN=IGLV1-51 PE=1 SV=2	0	7.868	17.9487	3	4	3	1	117	12.2	7.03	High		5.31	26	3
TRUE	High	Master Protein	Q02218	2-oxoglutarate dehydrogenase, mitochondrial OS=Homo sapiens GN=OGDH PE=1 SV=3	0	7.832	1.85728	2	2	2	1	1023	115.9	6.86	High		0.089	75	2
TRUE	High	Master Protein	O00471	Exocyst complex component 5 OS=Homo sapiens GN=EXOC5 PE=1 SV=1	0	7.806	6.21469	4	4	4	1	708	81.8	6.71	High		0.212	24	4
TRUE	High	Master Protein	Q99497	Protein DJ-1 OS=Homo sapiens GN=PARK7 PE=1 SV=2	0	7.805	16.4021	3	4	3	1	189	19.9	6.79	High		1.031	46	3
TRUE	High	Master Protein	P02656	Apolipoprotein C-III OS=Homo sapiens GN=APOC3 PE=1 SV=1	0	7.791	16.1616	1	1	1	1	99	10.8	5.41	High		0.468	75	1
TRUE	High	Master Protein	Q9Y277	Voltage-dependent anion-selective channel protein 3 OS=Homo sapiens GN=VDAC3 PE=1 SV=1	0	7.782	12.3675	3	4	2	1	283	30.6	8.66	High		0.438	101	3
TRUE	High	Master Protein	Q02413	Desmoglein-1 OS=Homo sapiens GN=DSG1 PE=1 SV=2	0	7.769	2.28789	2	3	2	1	1049	113.7	5.03	High		0.17	61	2
TRUE	High	Master Protein	Q9UM00	Calcium load-activated calcium channel OS=Homo sapiens GN=TMCO1 PE=1 SV=1	0	7.748	12.234	2	4	2	1	188	21.2	9.74	High		0.778	115	2
TRUE	High	Master Protein	Q96C19	EF-hand domain-containing protein D2 OS=Homo sapiens GN=EFHD2 PE=1 SV=1	0	7.715	15.8333	4	4	4	1	240	26.7	5.2	High		0.719	24	4
TRUE	High	Master Protein	Q16795	NADH dehydrogenase [ubiquinone] 1 alpha subcomplex subunit 9, mitochondrial OS=Homo sapiens GN=NDUFA9 PE=1 SV=2	0	7.707	12.2016	3	3	3	1	377	42.5	9.8	High		0.28	57	3
TRUE	High	Master Protein	Q14980	Nuclear mitotic apparatus protein 1 OS=Homo sapiens GN=NUMA1 PE=1 SV=2	0	7.691	1.84397	3	3	3	1	2115	238.1	5.78	High		0.049	75	3
TRUE	High	Master Protein	Q5H9R7	Serine/threonine-protein phosphatase 6 regulatory subunit 3 OS=Homo sapiens GN=PPP6R3 PE=1 SV=2	0	7.691	5.95647	4	4	4	1	873	97.6	4.6	High		0.202	48	4
TRUE	High	Master Protein	Q15369	Elongin-C OS=Homo sapiens GN=ELOC PE=1 SV=1	0	7.684	33.0357	3	3	3	1	112	12.5	4.78	High		1.371	39	3
TRUE	High	Master Protein	Q5RI15	Cytochrome c oxidase protein 20 homolog OS=Homo sapiens GN=COX20 PE=1 SV=2	0	7.668	22.8814	2	3	2	1	118	13.3	8.76	High		2.162	65	2
TRUE	High	Master Protein	O76094	Signal recognition particle subunit SRP72 OS=Homo sapiens GN=SRP72 PE=1 SV=3	0	7.607	4.32191	3	3	3	1	671	74.6	9.26	High		0.179	75	3
TRUE	High	Master Protein	P27816	Microtubule-associated protein 4 OS=Homo sapiens GN=MAP4 PE=1 SV=3	0	7.607	3.47222	3	3	3	1	1152	120.9	5.43	High		0.101	69	3
TRUE	High	Master Protein	P31949	Protein S100-A11 OS=Homo sapiens GN=S100A11 PE=1 SV=2	0	7.576	18.0952	2	4	2	1	105	11.7	7.12	High		1.683	111	2
TRUE	High	Master Protein	P49755	Transmembrane emp24 domain-containing protein 10 OS=Homo sapiens GN=TMED10 PE=1 SV=2	0	7.52	16.895	3	4	3	1	219	25	7.44	High	Phospho [T77(100); S79(100); Y85(100); S86(100)]	0.701	62	3
TRUE	High	Master Protein	P35613	Basigin OS=Homo sapiens GN=BSG PE=1 SV=2	0	7.515	14.8052	4	4	4	1	385	42.2	5.66	High		0.585	60	4
TRUE	High	Master Protein	O60684	Importin subunit alpha-7 OS=Homo sapiens GN=KPNA6 PE=1 SV=1	0	7.509	5.97015	3	3	3	1	536	60	4.98	High		0.28	48	3
TRUE	High	Master Protein	Q9Y305	Acyl-coenzyme A thioesterase 9, mitochondrial OS=Homo sapiens GN=ACOT9 PE=1 SV=2	0	7.478	11.1617	4	4	4	1	439	49.9	8.6	High		0.374	50	4
TRUE	High	Master Protein	O15397	Importin-8 OS=Homo sapiens GN=IPO8 PE=1 SV=2	0	7.472	3.08582	3	4	2	1	1037	119.9	5.16	High		0.131	96	3
TRUE	High	Master Protein	O75874	Isocitrate dehydrogenase [NADP] cytoplasmic OS=Homo sapiens GN=IDH1 PE=1 SV=2	0	7.439	7.24638	3	3	2	1	414	46.6	7.01	High		0.259	57	3
TRUE	High	Master Protein	P40616	ADP-ribosylation factor-like protein 1 OS=Homo sapiens GN=ARL1 PE=1 SV=1	0	7.423	7.73481	1	1	1	1	181	20.4	5.72	High		0.259	45	1
TRUE	High	Master Protein	Q8TDX7	Serine/threonine-protein kinase Nek7 OS=Homo sapiens GN=NEK7 PE=1 SV=1	0	7.405	10.2649	2	2	2	1	302	34.5	8.25	High		0.274	56	2
TRUE	High	Master Protein	O43837	Isocitrate dehydrogenase [NAD] subunit beta, mitochondrial OS=Homo sapiens GN=IDH3B PE=1 SV=2	0	7.404	9.09091	3	3	3	1	385	42.2	8.46	High		0.35	44	3
TRUE	High	Master Protein	P51151	Ras-related protein Rab-9A OS=Homo sapiens GN=RAB9A PE=1 SV=1	0	7.359	12.4378	2	2	2	1	201	22.8	5.47	High		0.389	54	2
TRUE	High	Master Protein	Q9UBF2	Coatomer subunit gamma-2 OS=Homo sapiens GN=COPG2 PE=1 SV=1	0	7.355	3.32951	3	3	1	1	871	97.6	5.81	High		0.148	60	3
TRUE	High	Master Protein	Q9Y2L1	Exosome complex exonuclease RRP44 OS=Homo sapiens GN=DIS3 PE=1 SV=2	0	7.332	4.17537	3	4	3	1	958	108.9	7.14	High		0.129	66	3
TRUE	High	Master Protein	P82675	28S ribosomal protein S5, mitochondrial OS=Homo sapiens GN=MRPS5 PE=1 SV=2	0	7.324	10.9302	3	3	3	1	430	48	9.92	High		0.292	37	3
TRUE	High	Master Protein	Q9P287	BRCA2 and CDKN1A-interacting protein OS=Homo sapiens GN=BCCIP PE=1 SV=1	0	7.319	7.32484	1	1	1	1	314	36	4.61	High		0.122	67	1
TRUE	High	Master Protein	P57772	Selenocysteine-specific elongation factor OS=Homo sapiens GN=EEFSEC PE=1 SV=4	0	7.304	6.37584	2	2	2	1	596	65.3	8.35	High		0.141	66	2
TRUE	High	Master Protein	Q9BYD1	39S ribosomal protein L13, mitochondrial OS=Homo sapiens GN=MRPL13 PE=1 SV=1	0	7.286	14.0449	2	2	2	1	178	20.7	9.16	High		0.359	62	2
TRUE	High	Master Protein	Q9NX63	MICOS complex subunit MIC19 OS=Homo sapiens GN=CHCHD3 PE=1 SV=1	0	7.276	15.859	4	4	4	1	227	26.1	8.28	High		0.668	50	4
TRUE	High	Master Protein	P14174	Macrophage migration inhibitory factor OS=Homo sapiens GN=MIF PE=1 SV=4	0	7.274	17.3913	2	2	2	1	115	12.5	7.88	High		2.162	64	2
TRUE	High	Master Protein	O75964	ATP synthase subunit g, mitochondrial OS=Homo sapiens GN=ATP5L PE=1 SV=3	0	7.264	24.2718	2	2	2	1	103	11.4	9.64	High		0.778	66	2
TRUE	High	Master Protein	Q9BQG0	Myb-binding protein 1A OS=Homo sapiens GN=MYBBP1A PE=1 SV=2	0	7.208	2.03313	2	2	2	1	1328	148.8	9.28	High		0.06	40	2
TRUE	High	Master Protein	Q9BZE1	39S ribosomal protein L37, mitochondrial OS=Homo sapiens GN=MRPL37 PE=1 SV=2	0	7.196	11.5839	3	3	3	1	423	48.1	8.59	High		0.241	38	3
TRUE	High	Master Protein	Q13200	26S proteasome non-ATPase regulatory subunit 2 OS=Homo sapiens GN=PSMD2 PE=1 SV=3	0	7.19	3.52423	2	3	2	1	908	100.1	5.2	High		0.124	26	2
TRUE	High	Master Protein	Q8TDN6	Ribosome biogenesis protein BRX1 homolog OS=Homo sapiens GN=BRIX1 PE=1 SV=2	0	7.187	14.1643	3	3	3	1	353	41.4	9.92	High		0.413	40	3
TRUE	High	Master Protein	Q03169	Tumor necrosis factor alpha-induced protein 2 OS=Homo sapiens GN=TNFAIP2 PE=2 SV=2	0	7.184	6.26911	3	3	3	1	654	72.6	6.46	High		0.189	42	3
TRUE	High	Master Protein	P38159	RNA-binding motif protein, X chromosome OS=Homo sapiens GN=RBMX PE=1 SV=3	0	7.177	7.67263	3	3	3	1	391	42.3	10.05	High		0.233	64	3
TRUE	High	Master Protein	O95159	Zinc finger protein-like 1 OS=Homo sapiens GN=ZFPL1 PE=1 SV=2	0	7.176	8.3871	2	2	2	1	310	34.1	8.07	High		0.425	27	2
TRUE	High	Master Protein	P01599	Immunoglobulin kappa variable 1-17 OS=Homo sapiens GN=IGKV1-17 PE=1 SV=2	0	7.138	12.8205	1	2	1	1	117	12.8	8.68	High		0.389	137	1
TRUE	High	Master Protein	O14949	Cytochrome b-c1 complex subunit 8 OS=Homo sapiens GN=UQCRQ PE=1 SV=4	0	7.134	29.2683	4	6	4	1	82	9.9	10.08	High		3.642	68	4
TRUE	High	Master Protein	O00425	Insulin-like growth factor 2 mRNA-binding protein 3 OS=Homo sapiens GN=IGF2BP3 PE=1 SV=2	0	7.132	6.21762	3	3	3	1	579	63.7	8.87	High		0.218	37	3
TRUE	High	Master Protein	Q96H79	Zinc finger CCCH-type antiviral protein 1-like OS=Homo sapiens GN=ZC3HAV1L PE=1 SV=2	0	7.019	11	3	3	3	1	300	32.9	8.13	High		0.585	52	3
TRUE	High	Master Protein	O14880	Microsomal glutathione S-transferase 3 OS=Homo sapiens GN=MGST3 PE=1 SV=1	0	6.977	8.55263	1	1	1	1	152	16.5	9.38	High		0.334	81	1
TRUE	High	Master Protein	P55084	Trifunctional enzyme subunit beta, mitochondrial OS=Homo sapiens GN=HADHB PE=1 SV=3	0	6.969	7.59494	2	2	2	1	474	51.3	9.41	High		0.16	42	2
TRUE	High	Master Protein	Q15126	Phosphomevalonate kinase OS=Homo sapiens GN=PMVK PE=1 SV=3	0	6.927	9.89583	2	2	2	1	192	22	5.73	High		0.389	80	2
TRUE	High	Master Protein	O75489	NADH dehydrogenase [ubiquinone] iron-sulfur protein 3, mitochondrial OS=Homo sapiens GN=NDUFS3 PE=1 SV=1	0	6.9	10.2273	2	3	2	1	264	30.2	7.5	High		0.413	61	2
TRUE	High	Master Protein	O00541	Pescadillo homolog OS=Homo sapiens GN=PES1 PE=1 SV=1	0	6.832	6.12245	3	3	3	1	588	68	7.33	High		0.199	40	3
TRUE	High	Master Protein	Q15651	High mobility group nucleosome-binding domain-containing protein 3 OS=Homo sapiens GN=HMGN3 PE=1 SV=2	0	6.824	15.1515	1	1	1	1	99	10.7	9.66	High		0.585	36	1
TRUE	High	Master Protein	Q5JTZ9	Alanine--tRNA ligase, mitochondrial OS=Homo sapiens GN=AARS2 PE=1 SV=1	0	6.819	2.63959	2	2	2	1	985	107.3	6.27	High		0.083	87	2
TRUE	High	Master Protein	Q8WWI1	LIM domain only protein 7 OS=Homo sapiens GN=LMO7 PE=1 SV=3	0	6.808	1.72311	2	2	2	1	1683	192.6	8.09	High		0.042	94	2
TRUE	High	Master Protein	Q13247	Serine/arginine-rich splicing factor 6 OS=Homo sapiens GN=SRSF6 PE=1 SV=2	0	6.792	9.01163	3	3	2	1	344	39.6	11.43	High		0.389	68	3
TRUE	High	Master Protein	P46439	Glutathione S-transferase Mu 5 OS=Homo sapiens GN=GSTM5 PE=1 SV=3	0	6.77	11.9266	2	2	1	1	218	25.7	7.39	High		0.274	64	2
TRUE	High	Master Protein	Q5BJD5	Transmembrane protein 41B OS=Homo sapiens GN=TMEM41B PE=1 SV=1	0	6.726	9.27835	2	3	2	1	291	32.5	9.58	High		0.874	41	2
TRUE	High	Master Protein	Q9NZN4	EH domain-containing protein 2 OS=Homo sapiens GN=EHD2 PE=1 SV=2	0	6.718	6.814	3	3	2	1	543	61.1	6.46	High		0.212	61	3
TRUE	High	Master Protein	Q6PD62	RNA polymerase-associated protein CTR9 homolog OS=Homo sapiens GN=CTR9 PE=1 SV=1	0	6.713	3.06905	3	3	3	1	1173	133.4	6.77	High		0.105	35	3
TRUE	High	Master Protein	Q96EK5	KIF1-binding protein OS=Homo sapiens GN=KIF1BP PE=1 SV=1	0	6.651	4.02576	2	2	2	1	621	71.8	5.49	High		0.141	29	2
TRUE	High	Master Protein	P07477	Trypsin-1 OS=Homo sapiens GN=PRSS1 PE=1 SV=1	0	6.647	4.04858	1	8	1	1	247	26.5	6.51	High		0.389	148	1
TRUE	High	Master Protein	P28288	ATP-binding cassette sub-family D member 3 OS=Homo sapiens GN=ABCD3 PE=1 SV=1	0	6.633	5.00759	3	3	3	1	659	75.4	9.36	High		0.17	65	3
TRUE	High	Master Protein	P26447	Protein S100-A4 OS=Homo sapiens GN=S100A4 PE=1 SV=1	0	6.622	27.7228	3	3	3	1	101	11.7	6.11	High		2.162	61	3
TRUE	High	Master Protein	P78347	General transcription factor II-I OS=Homo sapiens GN=GTF2I PE=1 SV=2	0	6.614	1.60321	1	1	1	1	998	112.3	6.39	High		0.038	45	1
TRUE	High	Master Protein	Q71RC2	La-related protein 4 OS=Homo sapiens GN=LARP4 PE=1 SV=3	0	6.605	4.83425	3	3	3	1	724	80.5	6.61	High		0.205	37	3
TRUE	High	Master Protein	P12273	Prolactin-inducible protein OS=Homo sapiens GN=PIP PE=1 SV=1	0	6.593	15.7534	2	2	2	1	146	16.6	8.05	High		0.468	69	2
TRUE	High	Master Protein	P52788	Spermine synthase OS=Homo sapiens GN=SMS PE=1 SV=2	0	6.567	5.19126	2	2	2	1	366	41.2	5.02	High		0.222	71	2
TRUE	High	Master Protein	Q15427	Splicing factor 3B subunit 4 OS=Homo sapiens GN=SF3B4 PE=1 SV=1	0	6.557	3.30189	1	1	1	1	424	44.4	8.56	High		0.166	78	1
TRUE	High	Master Protein	Q96P70	Importin-9 OS=Homo sapiens GN=IPO9 PE=1 SV=3	0	6.529	3.26609	2	2	2	1	1041	115.9	4.81	High		0.101	61	2
TRUE	High	Master Protein	O75306	NADH dehydrogenase [ubiquinone] iron-sulfur protein 2, mitochondrial OS=Homo sapiens GN=NDUFS2 PE=1 SV=2	0	6.497	4.31965	2	2	2	1	463	52.5	7.55	High		0.186	44	2
TRUE	High	Master Protein	P06396	Gelsolin OS=Homo sapiens GN=GSN PE=1 SV=1	0	6.422	5.37084	4	4	4	1	782	85.6	6.28	High		0.252	43	4
TRUE	High	Master Protein	Q9H2M9	Rab3 GTPase-activating protein non-catalytic subunit OS=Homo sapiens GN=RAB3GAP2 PE=1 SV=1	0	6.394	1.79469	2	3	2	1	1393	155.9	5.62	High		0.094	36	2
TRUE	High	Master Protein	P0C7H8	Keratin-associated protein 2-3 OS=Homo sapiens GN=KRTAP2-3 PE=1 SV=2	0	6.391	7.8125	1	8	1	1	128	13.5	7.87	High		3.642	81	1
TRUE	High	Master Protein	P34896	Serine hydroxymethyltransferase, cytosolic OS=Homo sapiens GN=SHMT1 PE=1 SV=1	0	6.371	4.14079	2	3	2	1	483	53	7.71	High		0.16	87	2
TRUE	High	Master Protein	Q9NRF8	CTP synthase 2 OS=Homo sapiens GN=CTPS2 PE=1 SV=1	0	6.323	4.09556	2	2	1	1	586	65.6	6.9	High		0.141	66	2
TRUE	High	Master Protein	O95372	Acyl-protein thioesterase 2 OS=Homo sapiens GN=LYPLA2 PE=1 SV=1	0	6.312	19.0476	2	2	2	1	231	24.7	7.23	High		0.389	40	2
TRUE	High	Master Protein	P30419	Glycylpeptide N-tetradecanoyltransferase 1 OS=Homo sapiens GN=NMT1 PE=1 SV=2	0	6.285	6.65323	2	2	2	1	496	56.8	7.8	High		0.194	47	2
TRUE	High	Master Protein	Q13464	Rho-associated protein kinase 1 OS=Homo sapiens GN=ROCK1 PE=1 SV=1	0	6.28	3.24963	3	3	2	1	1354	158.1	5.9	High		0.073	46	3
TRUE	High	Master Protein	P49770	Translation initiation factor eIF-2B subunit beta OS=Homo sapiens GN=EIF2B2 PE=1 SV=3	0	6.267	7.40741	2	2	2	1	351	39	6.16	High		0.259	51	2
TRUE	High	Master Protein	P01714	Immunoglobulin lambda variable 3-19 OS=Homo sapiens GN=IGLV3-19 PE=1 SV=2	0	6.258	16.9643	2	3	2	1	112	12	4.96	High		1.512	70	2
TRUE	High	Master Protein	P51570	Galactokinase OS=Homo sapiens GN=GALK1 PE=1 SV=1	0	6.25	5.10204	2	3	2	1	392	42.2	6.46	High		0.259	68	2
TRUE	High	Master Protein	Q03518	Antigen peptide transporter 1 OS=Homo sapiens GN=TAP1 PE=1 SV=2	0	6.24	3.09406	2	2	2	1	808	87.2	8.02	High		0.129	57	2
TRUE	High	Master Protein	Q15084	Protein disulfide-isomerase A6 OS=Homo sapiens GN=PDIA6 PE=1 SV=1	0	6.235	5.45455	2	2	2	1	440	48.1	5.08	High		0.186	61	2
TRUE	High	Master Protein	P17844	Probable ATP-dependent RNA helicase DDX5 OS=Homo sapiens GN=DDX5 PE=1 SV=1	0	6.232	3.4202	2	2	2	1	614	69.1	8.92	High		0.136	48	2
TRUE	High	Master Protein	Q14244	Ensconsin OS=Homo sapiens GN=MAP7 PE=1 SV=1	0	6.228	6.00801	3	3	3	1	749	84	9.61	High		0.205	38	3
TRUE	High	Master Protein	O43143	Pre-mRNA-splicing factor ATP-dependent RNA helicase DHX15 OS=Homo sapiens GN=DHX15 PE=1 SV=2	0	6.133	4.15094	3	3	3	1	795	90.9	7.46	High		0.166	53	3
TRUE	High	Master Protein	Q9Y262	Eukaryotic translation initiation factor 3 subunit L OS=Homo sapiens GN=EIF3L PE=1 SV=1	0	6.126	3.01418	2	2	2	1	564	66.7	6.34	High		0.15	49	2
TRUE	High	Master Protein	P20340	Ras-related protein Rab-6A OS=Homo sapiens GN=RAB6A PE=1 SV=3	0	6.095	10.5769	2	3	1	1	208	23.6	5.54	High		0.311	83	2
TRUE	High	Master Protein	Q16822	Phosphoenolpyruvate carboxykinase [GTP], mitochondrial OS=Homo sapiens GN=PCK2 PE=1 SV=3	0	6.045	2.96875	2	2	2	1	640	70.7	7.62	High		0.122	44	2
TRUE	High	Master Protein	P11413	Glucose-6-phosphate 1-dehydrogenase OS=Homo sapiens GN=G6PD PE=1 SV=4	0	6.021	2.91262	1	1	1	1	515	59.2	6.84	High		0.062	44	1
TRUE	High	Master Protein	P46459	Vesicle-fusing ATPase OS=Homo sapiens GN=NSF PE=1 SV=3	0	6.001	3.22581	2	2	2	1	744	82.5	6.95	High		0.089	57	2
TRUE	High	Master Protein	Q07666	KH domain-containing, RNA-binding, signal transduction-associated protein 1 OS=Homo sapiens GN=KHDRBS1 PE=1 SV=1	0	5.988	9.70655	2	2	2	1	443	48.2	8.66	High		0.212	31	2
TRUE	High	Master Protein	O00154	Cytosolic acyl coenzyme A thioester hydrolase OS=Homo sapiens GN=ACOT7 PE=1 SV=3	0	5.974	7.36842	2	3	2	1	380	41.8	8.54	High		0.369	21	2
TRUE	High	Master Protein	Q7Z7A3	Cytoplasmic tRNA 2-thiolation protein 1 OS=Homo sapiens GN=CTU1 PE=1 SV=1	0	5.951	3.44828	1	1	1	1	348	36.4	9.2	High		0.122	54	1
TRUE	High	Master Protein	O75083	WD repeat-containing protein 1 OS=Homo sapiens GN=WDR1 PE=1 SV=4	0	5.951	5.77558	2	2	2	1	606	66.2	6.65	High		0.125	58	2
TRUE	High	Master Protein	P60891	Ribose-phosphate pyrophosphokinase 1 OS=Homo sapiens GN=PRPS1 PE=1 SV=2	0	5.924	6.28931	2	2	1	1	318	34.8	6.98	High		0.259	59	2
TRUE	High	Master Protein	P00387	NADH-cytochrome b5 reductase 3 OS=Homo sapiens GN=CYB5R3 PE=1 SV=3	0	5.908	12.9568	3	3	3	1	301	34.2	7.59	High		0.501	35	3
TRUE	High	Master Protein	O76031	ATP-dependent Clp protease ATP-binding subunit clpX-like, mitochondrial OS=Homo sapiens GN=CLPX PE=1 SV=2	0	5.846	6.31912	3	3	3	1	633	69.2	7.58	High		0.17	33	3
TRUE	High	Master Protein	Q96HS1	Serine/threonine-protein phosphatase PGAM5, mitochondrial OS=Homo sapiens GN=PGAM5 PE=1 SV=2	0	5.843	10.3806	3	3	3	1	289	32	8.68	High		0.438	49	3
TRUE	High	Master Protein	P34932	Heat shock 70 kDa protein 4 OS=Homo sapiens GN=HSPA4 PE=1 SV=4	0	5.836	2.38095	2	2	2	1	840	94.3	5.19	High		0.083	44	2
TRUE	High	Master Protein	O14684	Prostaglandin E synthase OS=Homo sapiens GN=PTGES PE=1 SV=2	0	5.827	7.23684	2	4	2	1	152	17.1	9.5	High		0.778	101	2
TRUE	High	Master Protein	P52564	Dual specificity mitogen-activated protein kinase kinase 6 OS=Homo sapiens GN=MAP2K6 PE=1 SV=1	0	5.826	7.48503	3	3	2	1	334	37.5	7.39	High		0.35	51	3
TRUE	High	Master Protein	Q96D46	60S ribosomal export protein NMD3 OS=Homo sapiens GN=NMD3 PE=1 SV=1	0	5.822	6.75944	2	2	2	1	503	57.6	7.14	High		0.172	45	2
TRUE	High	Master Protein	Q9NRP0	Oligosaccharyltransferase complex subunit OSTC OS=Homo sapiens GN=OSTC PE=1 SV=1	0	5.795	8.05369	1	2	1	1	149	16.8	9.13	High		0.468	77	1
TRUE	High	Master Protein	Q9Y3D7	Mitochondrial import inner membrane translocase subunit TIM16 OS=Homo sapiens GN=PAM16 PE=1 SV=2	0	5.794	24	3	3	3	1	125	13.8	9.7	High		0.995	54	3
TRUE	High	Master Protein	P67809	Nuclease-sensitive element-binding protein 1 OS=Homo sapiens GN=YBX1 PE=1 SV=3	0	5.777	16.6667	2	2	2	1	324	35.9	9.88	High		0.389	32	2
TRUE	High	Master Protein	Q9BYX2	TBC1 domain family member 2A OS=Homo sapiens GN=TBC1D2 PE=1 SV=3	0	5.678	1.2931	1	1	1	1	928	105.3	6.58	High		0.042	59	1
TRUE	High	Master Protein	O00139	Kinesin-like protein KIF2A OS=Homo sapiens GN=KIF2A PE=1 SV=3	0	5.671	3.39943	2	2	2	1	706	79.9	6.68	High		0.105	51	2
TRUE	High	Master Protein	E9PAV3	Nascent polypeptide-associated complex subunit alpha, muscle-specific form OS=Homo sapiens GN=NACA PE=1 SV=1	0	5.652	0.721848	1	1	1	1	2078	205.3	9.58	High		0.02	60	1
TRUE	High	Master Protein	P56134	ATP synthase subunit f, mitochondrial OS=Homo sapiens GN=ATP5J2 PE=1 SV=3	0	5.641	11.7021	1	2	1	1	94	10.9	9.67	High		0.778	73	1
TRUE	High	Master Protein	Q9BW60	Elongation of very long chain fatty acids protein 1 OS=Homo sapiens GN=ELOVL1 PE=1 SV=1	0	5.64	9.319	2	2	2	1	279	32.6	9.6	High		0.585	25	2
TRUE	High	Master Protein	Q9NR56	Muscleblind-like protein 1 OS=Homo sapiens GN=MBNL1 PE=1 SV=2	0	5.625	6.4433	3	3	3	1	388	41.8	8.9	High		0.585	29	3
TRUE	High	Master Protein	O15427	Monocarboxylate transporter 4 OS=Homo sapiens GN=SLC16A3 PE=1 SV=1	0	5.601	4.51613	2	3	2	1	465	49.4	7.96	High		0.292	61	2
TRUE	High	Master Protein	P14406	Cytochrome c oxidase subunit 7A2, mitochondrial OS=Homo sapiens GN=COX7A2 PE=1 SV=1	0	5.576	27.7108	2	3	2	1	83	9.4	9.76	High		1.512	54	2
TRUE	High	Master Protein	P63220	40S ribosomal protein S21 OS=Homo sapiens GN=RPS21 PE=1 SV=1	0	5.56	21.6867	1	1	1	1	83	9.1	8.5	High		0.389	54	1
TRUE	High	Master Protein	A0A0C4DH68	Immunoglobulin kappa variable 2-24 OS=Homo sapiens GN=IGKV2-24 PE=3 SV=1	0	5.551	16.6667	1	1	1	1	120	13.1	8.53	High		0.585	24	1
TRUE	High	Master Protein	Q32P28	Prolyl 3-hydroxylase 1 OS=Homo sapiens GN=P3H1 PE=1 SV=2	0	5.543	2.98913	2	2	2	1	736	83.3	5.14	High		0.136	42	2
TRUE	High	Master Protein	Q92878	DNA repair protein RAD50 OS=Homo sapiens GN=RAD50 PE=1 SV=1	0	5.516	3.125	3	3	3	1	1312	153.8	6.89	High		0.074	44	3
TRUE	High	Master Protein	Q9UHD2	Serine/threonine-protein kinase TBK1 OS=Homo sapiens GN=TBK1 PE=1 SV=1	0	5.514	2.33196	1	1	1	1	729	83.6	6.79	High		0.051	49	1
TRUE	High	Master Protein	P84101	Small EDRK-rich factor 2 OS=Homo sapiens GN=SERF2 PE=1 SV=1	0	5.504	32.2034	2	2	2	1	59	6.9	10.45	High		3.642	33	2
TRUE	High	Master Protein	P13674	Prolyl 4-hydroxylase subunit alpha-1 OS=Homo sapiens GN=P4HA1 PE=1 SV=2	0	5.496	4.11985	2	2	2	1	534	61	6.01	High		0.145	31	2
TRUE	High	Master Protein	P49748	Very long-chain specific acyl-CoA dehydrogenase, mitochondrial OS=Homo sapiens GN=ACADVL PE=1 SV=1	0	5.483	3.20611	2	2	2	1	655	70.3	8.75	High		0.11	42	2
TRUE	High	Master Protein	Q96JP5	E3 ubiquitin-protein ligase ZFP91 OS=Homo sapiens GN=ZFP91 PE=1 SV=1	0	5.478	2.10526	1	1	1	1	570	63.4	7.36	High		0.083	37	1
TRUE	High	Master Protein	P25815	Protein S100-P OS=Homo sapiens GN=S100P PE=1 SV=2	0	5.458	13.6842	1	1	1	1	95	10.4	4.88	High		0.778	76	1
TRUE	High	Master Protein	P61160	Actin-related protein 2 OS=Homo sapiens GN=ACTR2 PE=1 SV=1	0	5.45	6.09137	3	4	3	1	394	44.7	6.74	High		0.233	59	3
TRUE	High	Master Protein	P49773	Histidine triad nucleotide-binding protein 1 OS=Homo sapiens GN=HINT1 PE=1 SV=2	0	5.44	18.254	2	2	2	1	126	13.8	6.95	High		0.778	44	2
TRUE	High	Master Protein	P82914	28S ribosomal protein S15, mitochondrial OS=Homo sapiens GN=MRPS15 PE=1 SV=1	0	5.422	7.393	2	2	2	1	257	29.8	10.48	High		0.274	42	2
TRUE	High	Master Protein	P20962	Parathymosin OS=Homo sapiens GN=PTMS PE=1 SV=2	0	5.379	11.7647	1	1	1	1	102	11.5	4.16	High		1.154	45	1
TRUE	High	Master Protein	P61106	Ras-related protein Rab-14 OS=Homo sapiens GN=RAB14 PE=1 SV=4	0	5.373	19.0698	2	3	1	1	215	23.9	6.21	High		0.359	81	2
TRUE	High	Master Protein	Q96CS3	FAS-associated factor 2 OS=Homo sapiens GN=FAF2 PE=1 SV=2	0	5.337	6.29213	2	2	2	1	445	52.6	5.62	High		0.186	31	2
TRUE	High	Master Protein	P10599	Thioredoxin OS=Homo sapiens GN=TXN PE=1 SV=3	0	5.321	20.9524	2	2	2	1	105	11.7	4.92	High		0.931	34	2
TRUE	High	Master Protein	A5YKK6	CCR4-NOT transcription complex subunit 1 OS=Homo sapiens GN=CNOT1 PE=1 SV=2	0	5.32	1.17845	2	2	2	1	2376	266.8	7.11	High		0.033	28	2
TRUE	High	Master Protein	Q9BXJ8	Transmembrane protein 120A OS=Homo sapiens GN=TMEM120A PE=1 SV=1	0	5.294	3.207	1	1	1	1	343	40.6	8.98	High		0.145	69	1
TRUE	High	Master Protein	Q5TFE4	5'-nucleotidase domain-containing protein 1 OS=Homo sapiens GN=NT5DC1 PE=1 SV=1	0	5.283	3.51648	1	1	1	1	455	51.8	6.35	High		0.086	48	1
TRUE	High	Master Protein	Q9NR12	PDZ and LIM domain protein 7 OS=Homo sapiens GN=PDLIM7 PE=1 SV=1	0	5.264	4.814	2	2	2	1	457	49.8	8.41	High		0.172	49	2
TRUE	High	Master Protein	Q9Y4P3	Transducin beta-like protein 2 OS=Homo sapiens GN=TBL2 PE=1 SV=1	0	5.247	2.90828	1	1	1	1	447	49.8	9.44	High		0.077	51	1
TRUE	High	Master Protein	Q9UHD8	Septin-9 OS=Homo sapiens GN=SEPT9 PE=1 SV=2	0	5.244	4.77816	3	3	3	1	586	65.4	8.97	High		0.189	35	3
TRUE	High	Master Protein	P32119	Peroxiredoxin-2 OS=Homo sapiens GN=PRDX2 PE=1 SV=5	0	5.242	9.09091	2	3	1	1	198	21.9	5.97	High		0.468	77	2
TRUE	High	Master Protein	Q9H7Z7	Prostaglandin E synthase 2 OS=Homo sapiens GN=PTGES2 PE=1 SV=1	0	5.239	14.0584	3	3	3	1	377	41.9	9.16	High		0.304	65	3
TRUE	High	Master Protein	Q6P2I3	Fumarylacetoacetate hydrolase domain-containing protein 2B OS=Homo sapiens GN=FAHD2B PE=1 SV=1	0	5.235	11.1465	2	2	2	1	314	34.6	7.75	High		0.292	27	2
TRUE	High	Master Protein	Q16763	Ubiquitin-conjugating enzyme E2 S OS=Homo sapiens GN=UBE2S PE=1 SV=2	0	5.235	5.40541	1	1	1	1	222	23.8	8.38	High		0.212	56	1
TRUE	High	Master Protein	P55735	Protein SEC13 homolog OS=Homo sapiens GN=SEC13 PE=1 SV=3	0	5.126	3.41615	1	1	1	1	322	35.5	5.48	High		0.179	66	1
TRUE	High	Master Protein	Q9BUJ2	Heterogeneous nuclear ribonucleoprotein U-like protein 1 OS=Homo sapiens GN=HNRNPUL1 PE=1 SV=2	0	5.105	4.08879	2	2	2	1	856	95.7	6.92	High		0.103	27	2
TRUE	High	Master Protein	Q00059	Transcription factor A, mitochondrial OS=Homo sapiens GN=TFAM PE=1 SV=1	0	5.101	7.72358	2	2	2	1	246	29.1	9.72	High		0.259	27	2
TRUE	High	Master Protein	O00483	Cytochrome c oxidase subunit NDUFA4 OS=Homo sapiens GN=NDUFA4 PE=1 SV=1	0	5.1	22.2222	2	4	2	1	81	9.4	9.38	High		1.154	36	2
TRUE	High	Master Protein	Q9BWF3	RNA-binding protein 4 OS=Homo sapiens GN=RBM4 PE=1 SV=1	0	5.084	6.86813	3	3	3	1	364	40.3	7.08	High		0.334	20	3
TRUE	High	Master Protein	O14641	Segment polarity protein dishevelled homolog DVL-2 OS=Homo sapiens GN=DVL2 PE=1 SV=1	0	5.082	1.63043	1	1	1	1	736	78.9	6.02	High		0.066	70	1
TRUE	High	Master Protein	Q15392	Delta(24)-sterol reductase OS=Homo sapiens GN=DHCR24 PE=1 SV=2	0	5.066	4.84496	2	2	2	1	516	60.1	8.16	High		0.202	56	2
TRUE	High	Master Protein	Q13131	5'-AMP-activated protein kinase catalytic subunit alpha-1 OS=Homo sapiens GN=PRKAA1 PE=1 SV=4	0	5.061	6.08229	2	2	2	1	559	64	8.12	High		0.141	59	2
TRUE	High	Master Protein	Q9BY44	Eukaryotic translation initiation factor 2A OS=Homo sapiens GN=EIF2A PE=1 SV=3	0	5.06	5.12821	1	1	1	1	585	64.9	8.87	High		0.064	28	1
TRUE	High	Master Protein	O60427	Fatty acid desaturase 1 OS=Homo sapiens GN=FADS1 PE=1 SV=3	0	5.031	4.5045	2	2	2	1	444	51.9	8.87	High		0.212	23	2
TRUE	High	Master Protein	P04181	Ornithine aminotransferase, mitochondrial OS=Homo sapiens GN=OAT PE=1 SV=1	0	5.012	5.92255	2	2	2	1	439	48.5	7.03	High		0.186	53	2
TRUE	High	Master Protein	P84103	Serine/arginine-rich splicing factor 3 OS=Homo sapiens GN=SRSF3 PE=1 SV=1	0	4.976	10.3659	1	1	1	1	164	19.3	11.65	High		0.259	36	1
TRUE	High	Master Protein	O75347	Tubulin-specific chaperone A OS=Homo sapiens GN=TBCA PE=1 SV=3	0	4.952	16.6667	1	1	1	1	108	12.8	5.29	High		0.389	24	1
TRUE	High	Master Protein	P41223	Protein BUD31 homolog OS=Homo sapiens GN=BUD31 PE=1 SV=2	0	4.939	6.94444	1	1	1	1	144	17	8.82	High		0.292	47	1
TRUE	High	Master Protein	Q9UH62	Armadillo repeat-containing X-linked protein 3 OS=Homo sapiens GN=ARMCX3 PE=1 SV=1	0	4.928	3.43008	1	1	1	1	379	42.5	8.37	High		0.122	59	1
TRUE	High	Master Protein	O00505	Importin subunit alpha-4 OS=Homo sapiens GN=KPNA3 PE=1 SV=2	0	4.915	4.9904	3	3	3	1	521	57.8	4.94	High		0.35	40	3
TRUE	High	Master Protein	P27144	Adenylate kinase 4, mitochondrial OS=Homo sapiens GN=AK4 PE=1 SV=1	0	4.88	9.41704	2	2	2	1	223	25.3	8.4	High		0.359	26	2
TRUE	High	Master Protein	Q9NVE7	Pantothenate kinase 4 OS=Homo sapiens GN=PANK4 PE=1 SV=1	0	4.872	3.23415	2	2	2	1	773	85.9	6.28	High		0.089	60	2
TRUE	High	Master Protein	Q5JWF2	Guanine nucleotide-binding protein G(s) subunit alpha isoforms XLas OS=Homo sapiens GN=GNAS PE=1 SV=2	0	4.867	1.92864	2	3	2	1	1037	111	5.03	High		0.133	34	2
TRUE	High	Master Protein	Q9BQB6	Vitamin K epoxide reductase complex subunit 1 OS=Homo sapiens GN=VKORC1 PE=1 SV=1	0	4.851	7.97546	1	1	1	1	163	18.2	9.36	High		0.585	49	1
TRUE	High	Master Protein	Q9UBI6	Guanine nucleotide-binding protein G(I)/G(S)/G(O) subunit gamma-12 OS=Homo sapiens GN=GNG12 PE=1 SV=3	0	4.846	15.2778	1	1	1	1	72	8	8.97	High		0.585	58	1
TRUE	High	Master Protein	P51398	28S ribosomal protein S29, mitochondrial OS=Homo sapiens GN=DAP3 PE=1 SV=1	0	4.843	2.76382	1	1	1	1	398	45.5	8.88	High		0.101	46	1
TRUE	High	Master Protein	Q08380	Galectin-3-binding protein OS=Homo sapiens GN=LGALS3BP PE=1 SV=1	0	4.837	1.88034	1	1	1	1	585	65.3	5.27	High		0.072	74	1
TRUE	High	Master Protein	Q92504	Zinc transporter SLC39A7 OS=Homo sapiens GN=SLC39A7 PE=1 SV=2	0	4.824	2.98507	1	2	1	1	469	50.1	6.87	High		0.52	21	1
TRUE	High	Master Protein	Q9Y3B7	39S ribosomal protein L11, mitochondrial OS=Homo sapiens GN=MRPL11 PE=1 SV=1	0	4.807	17.1875	2	2	2	1	192	20.7	9.91	High		0.389	45	2
TRUE	High	Master Protein	O95168	NADH dehydrogenase [ubiquinone] 1 beta subcomplex subunit 4 OS=Homo sapiens GN=NDUFB4 PE=1 SV=3	0	4.777	17.0543	2	2	2	1	129	15.2	9.85	High		0.778	45	2
TRUE	High	Master Protein	Q9GZS3	WD repeat-containing protein 61 OS=Homo sapiens GN=WDR61 PE=1 SV=1	0	4.775	19.0164	3	3	3	1	305	33.6	5.47	High		0.501	25	3
TRUE	High	Master Protein	Q13427	Peptidyl-prolyl cis-trans isomerase G OS=Homo sapiens GN=PPIG PE=1 SV=2	0	4.742	1.59151	1	1	1	1	754	88.6	10.29	High		0.077	50	1
TRUE	High	Master Protein	P19387	DNA-directed RNA polymerase II subunit RPB3 OS=Homo sapiens GN=POLR2C PE=1 SV=2	0	4.728	6.90909	1	1	1	1	275	31.4	4.92	High		0.166	39	1
TRUE	High	Master Protein	Q8IUC1	Keratin-associated protein 11-1 OS=Homo sapiens GN=KRTAP11-1 PE=2 SV=1	0	4.724	6.74847	1	3	1	1	163	17.1	7.9	High		0.778	121	1
TRUE	High	Master Protein	Q8N6T3	ADP-ribosylation factor GTPase-activating protein 1 OS=Homo sapiens GN=ARFGAP1 PE=1 SV=2	0	4.72	8.37438	2	2	2	1	406	44.6	5.66	High		0.202	27	2
TRUE	High	Master Protein	P01706	Immunoglobulin lambda variable 2-11 OS=Homo sapiens GN=IGLV2-11 PE=1 SV=2	0	4.718	17.6471	2	4	1	1	119	12.6	7.24	High		1.512	38	2
TRUE	High	Master Protein	Q15125	3-beta-hydroxysteroid-Delta(8),Delta(7)-isomerase OS=Homo sapiens GN=EBP PE=1 SV=3	0	4.715	5.21739	1	2	1	1	230	26.3	7.9	High		0.778	26	1
TRUE	High	Master Protein	Q05209	Tyrosine-protein phosphatase non-receptor type 12 OS=Homo sapiens GN=PTPN12 PE=1 SV=3	0	4.701	1.15385	1	1	1	1	780	88.1	5.62	High		0.048	65	1
TRUE	High	Master Protein	Q8N163	Cell cycle and apoptosis regulator protein 2 OS=Homo sapiens GN=CCAR2 PE=1 SV=2	0	4.689	0.975081	1	1	1	1	923	102.8	5.22	High		0.043	72	1
TRUE	High	Master Protein	P13010	X-ray repair cross-complementing protein 5 OS=Homo sapiens GN=XRCC5 PE=1 SV=3	0	4.673	2.18579	1	1	1	1	732	82.7	5.81	High		0.053	37	1
TRUE	High	Master Protein	A3KN83	Protein strawberry notch homolog 1 OS=Homo sapiens GN=SBNO1 PE=1 SV=1	0	4.652	1.79469	2	2	2	1	1393	154.2	7.88	High		0.062	47	2
TRUE	High	Master Protein	Q86V81	THO complex subunit 4 OS=Homo sapiens GN=ALYREF PE=1 SV=3	0	4.647	10.1167	1	1	1	1	257	26.9	11.15	High		0.166	35	1
TRUE	High	Master Protein	Q8TCJ2	Dolichyl-diphosphooligosaccharide--protein glycosyltransferase subunit STT3B OS=Homo sapiens GN=STT3B PE=1 SV=1	0	4.64	2.66344	2	2	1	1	826	93.6	8.91	High		0.116	37	2
TRUE	High	Master Protein	P23743	Diacylglycerol kinase alpha OS=Homo sapiens GN=DGKA PE=1 SV=3	0	4.622	2.44898	1	1	1	1	735	82.6	6.73	High		0.05	28	1
TRUE	High	Master Protein	O15160	DNA-directed RNA polymerases I and III subunit RPAC1 OS=Homo sapiens GN=POLR1C PE=1 SV=1	0	4.599	5.20231	1	1	1	1	346	39.2	5.5	High		0.155	54	1
TRUE	High	Master Protein	Q13347	Eukaryotic translation initiation factor 3 subunit I OS=Homo sapiens GN=EIF3I PE=1 SV=1	0	4.579	6.46154	2	2	2	1	325	36.5	5.64	High		0.222	28	2
TRUE	High	Master Protein	O75436	Vacuolar protein sorting-associated protein 26A OS=Homo sapiens GN=VPS26A PE=1 SV=2	0	4.578	8.25688	2	2	2	1	327	38.1	6.57	High		0.233	46	2
TRUE	High	Master Protein	Q01081	Splicing factor U2AF 35 kDa subunit OS=Homo sapiens GN=U2AF1 PE=1 SV=3	0	4.56	5.41667	1	1	1	1	240	27.9	8.81	High		0.212	52	1
TRUE	High	Master Protein	Q08170	Serine/arginine-rich splicing factor 4 OS=Homo sapiens GN=SRSF4 PE=1 SV=2	0	4.557	5.06073	2	2	1	1	494	56.6	11.52	High		0.245	57	2
TRUE	High	Master Protein	Q13547	Histone deacetylase 1 OS=Homo sapiens GN=HDAC1 PE=1 SV=1	0	4.545	5.80913	2	2	2	1	482	55.1	5.48	High		0.172	55	2
TRUE	High	Master Protein	O43264	Centromere/kinetochore protein zw10 homolog OS=Homo sapiens GN=ZW10 PE=1 SV=3	0	4.485	2.05392	1	1	1	1	779	88.8	6.27	High		0.048	40	1
TRUE	High	Master Protein	Q13148	TAR DNA-binding protein 43 OS=Homo sapiens GN=TARDBP PE=1 SV=1	0	4.463	6.28019	2	2	2	1	414	44.7	6.19	High		0.274	38	2
TRUE	High	Master Protein	O75367	Core histone macro-H2A.1 OS=Homo sapiens GN=H2AFY PE=1 SV=4	0	4.46	9.94624	2	2	2	1	372	39.6	9.79	High		0.274	24	2
TRUE	High	Master Protein	P62273	40S ribosomal protein S29 OS=Homo sapiens GN=RPS29 PE=1 SV=2	0	4.46	14.2857	2	2	2	1	56	6.7	10.13	High		2.162	55	2
TRUE	High	Master Protein	O60264	SWI/SNF-related matrix-associated actin-dependent regulator of chromatin subfamily A member 5 OS=Homo sapiens GN=SMARCA5 PE=1 SV=1	0	4.454	1.71103	2	2	2	1	1052	121.8	8.09	High		0.07	35	2
TRUE	High	Master Protein	O60313	Dynamin-like 120 kDa protein, mitochondrial OS=Homo sapiens GN=OPA1 PE=1 SV=3	0	4.439	1.875	2	2	2	1	960	111.6	7.87	High		0.071	46	2
TRUE	High	Master Protein	P54577	Tyrosine--tRNA ligase, cytoplasmic OS=Homo sapiens GN=YARS PE=1 SV=4	0	4.438	6.62879	2	2	2	1	528	59.1	7.05	High		0.11	21	2
TRUE	High	Master Protein	O95571	Persulfide dioxygenase ETHE1, mitochondrial OS=Homo sapiens GN=ETHE1 PE=1 SV=2	0	4.413	6.69291	1	1	1	1	254	27.9	6.83	High		0.155	51	1
TRUE	High	Master Protein	Q15796	Mothers against decapentaplegic homolog 2 OS=Homo sapiens GN=SMAD2 PE=1 SV=1	0	4.409	4.28266	2	2	2	1	467	52.3	6.58	High		0.245	55	2
TRUE	High	Master Protein	Q9Y6D9	Mitotic spindle assembly checkpoint protein MAD1 OS=Homo sapiens GN=MAD1L1 PE=1 SV=2	0	4.379	3.20334	2	2	2	1	718	83	5.92	High		0.099	45	2
TRUE	High	Master Protein	Q6PKG0	La-related protein 1 OS=Homo sapiens GN=LARP1 PE=1 SV=2	0	4.379	2.28102	2	2	2	1	1096	123.4	8.82	High		0.069	27	2
TRUE	High	Master Protein	P61604	10 kDa heat shock protein, mitochondrial OS=Homo sapiens GN=HSPE1 PE=1 SV=2	0	4.361	23.5294	3	4	3	1	102	10.9	8.92	High		0.995	39	3
TRUE	High	Master Protein	Q9UPN7	Serine/threonine-protein phosphatase 6 regulatory subunit 1 OS=Homo sapiens GN=PPP6R1 PE=1 SV=5	0	4.332	4.19977	2	2	2	1	881	96.7	4.55	High		0.125	24	2
TRUE	High	Master Protein	Q86SJ6	Desmoglein-4 OS=Homo sapiens GN=DSG4 PE=1 SV=1	0	4.329	1.82692	2	2	2	1	1040	113.8	4.56	High		0.125	47	2
TRUE	High	Master Protein	P62306	Small nuclear ribonucleoprotein F OS=Homo sapiens GN=SNRPF PE=1 SV=1	0	4.318	24.4186	2	2	2	1	86	9.7	4.67	High		1.512	46	2
TRUE	High	Master Protein	O60669	Monocarboxylate transporter 2 OS=Homo sapiens GN=SLC16A7 PE=1 SV=2	0	4.315	2.30126	1	1	1	1	478	52.2	9.31	High		0.166	54	1
TRUE	High	Master Protein	Q86YP4	Transcriptional repressor p66-alpha OS=Homo sapiens GN=GATAD2A PE=1 SV=1	0	4.306	1.73776	1	1	1	1	633	68	9.94	High		0.055	52	1
TRUE	High	Master Protein	Q9NUU7	ATP-dependent RNA helicase DDX19A OS=Homo sapiens GN=DDX19A PE=1 SV=1	0.001	4.285	3.34728	1	2	1	1	478	53.9	6.58	High		0.145	28	1
TRUE	High	Master Protein	Q8N2K0	Monoacylglycerol lipase ABHD12 OS=Homo sapiens GN=ABHD12 PE=1 SV=2	0.001	4.284	5.02513	2	2	2	1	398	45.1	8.65	High		0.222	22	2
TRUE	High	Master Protein	Q969M3	Protein YIPF5 OS=Homo sapiens GN=YIPF5 PE=1 SV=1	0.001	4.272	8.17121	2	2	2	1	257	28	4.36	High		1.512	25	2
TRUE	High	Master Protein	P05114	Non-histone chromosomal protein HMG-14 OS=Homo sapiens GN=HMGN1 PE=1 SV=3	0.001	4.253	13	1	1	1	1	100	10.7	9.6	High		0.468	35	1
TRUE	High	Master Protein	Q86X55	Histone-arginine methyltransferase CARM1 OS=Homo sapiens GN=CARM1 PE=1 SV=3	0.001	4.249	2.96053	1	1	1	1	608	65.8	6.73	High		0.086	35	1
TRUE	High	Master Protein	Q9UN37	Vacuolar protein sorting-associated protein 4A OS=Homo sapiens GN=VPS4A PE=1 SV=1	0.001	4.246	6.86499	3	3	3	1	437	48.9	7.8	High		0.259	30	3
TRUE	High	Master Protein	P59998	Actin-related protein 2/3 complex subunit 4 OS=Homo sapiens GN=ARPC4 PE=1 SV=3	0.001	4.244	11.3095	2	2	2	1	168	19.7	8.43	High		0.425	35	2
TRUE	High	Master Protein	Q96BN8	Ubiquitin thioesterase otulin OS=Homo sapiens GN=OTULIN PE=1 SV=3	0.001	4.238	3.125	1	1	1	1	352	40.2	5.47	High		0.101	58	1
TRUE	High	Master Protein	O15355	Protein phosphatase 1G OS=Homo sapiens GN=PPM1G PE=1 SV=1	0.001	4.235	4.0293	2	2	2	1	546	59.2	4.36	High		0.179	46	2
TRUE	High	Master Protein	Q4KMP7	TBC1 domain family member 10B OS=Homo sapiens GN=TBC1D10B PE=1 SV=3	0.001	4.204	2.47525	1	1	1	1	808	87.1	9.19	High		0.072	20	1
TRUE	High	Master Protein	Q08188	Protein-glutamine gamma-glutamyltransferase E OS=Homo sapiens GN=TGM3 PE=1 SV=4	0.001	4.183	1.443	1	1	1	1	693	76.6	5.86	High		0.054	42	1
TRUE	High	Master Protein	Q8WWC4	m-AAA protease-interacting protein 1, mitochondrial OS=Homo sapiens GN=MAIP1 PE=1 SV=1	0.001	4.151	3.09278	1	1	1	1	291	32.5	9.17	High		0.105	56	1
TRUE	High	Master Protein	Q00535	Cyclin-dependent-like kinase 5 OS=Homo sapiens GN=CDK5 PE=1 SV=3	0.001	4.15	6.50685	2	2	1	1	292	33.3	7.66	High		0.259	54	2
TRUE	High	Master Protein	P99999	Cytochrome c OS=Homo sapiens GN=CYCS PE=1 SV=2	0.001	4.139	10.4762	1	1	1	1	105	11.7	9.57	High		0.334	43	1
TRUE	High	Master Protein	Q9BSJ8	Extended synaptotagmin-1 OS=Homo sapiens GN=ESYT1 PE=1 SV=1	0.001	4.13	2.35507	2	2	2	1	1104	122.8	5.83	High		0.083	36	2
TRUE	High	Master Protein	Q9BZG1	Ras-related protein Rab-34 OS=Homo sapiens GN=RAB34 PE=1 SV=1	0.001	4.126	5.40541	1	1	1	1	259	29	7.88	High		0.122	52	1
TRUE	High	Master Protein	P13640	Metallothionein-1G OS=Homo sapiens GN=MT1G PE=1 SV=2	0.001	4.109	19.3548	1	1	1	1	62	6.1	7.96	High		1.154	46	1
TRUE	High	Master Protein	P35998	26S protease regulatory subunit 7 OS=Homo sapiens GN=PSMC2 PE=1 SV=3	0.001	4.105	2.54042	1	1	1	1	433	48.6	5.95	High		0.077	39	1
TRUE	High	Master Protein	Q92841	Probable ATP-dependent RNA helicase DDX17 OS=Homo sapiens GN=DDX17 PE=1 SV=2	0.001	4.089	2.05761	1	1	1	1	729	80.2	8.27	High		0.059	38	1
TRUE	High	Master Protein	P82933	28S ribosomal protein S9, mitochondrial OS=Homo sapiens GN=MRPS9 PE=1 SV=2	0.001	4.072	3.0303	1	1	1	1	396	45.8	9.51	High		0.083	48	1
TRUE	High	Master Protein	P01704	Immunoglobulin lambda variable 2-14 OS=Homo sapiens GN=IGLV2-14 PE=1 SV=2	0.001	4.072	13.3333	1	2	1	1	120	12.6	6.49	High		2.162	31	1
TRUE	High	Master Protein	A0A075B6I4	Immunoglobulin lambda variable 10-54 OS=Homo sapiens GN=IGLV10-54 PE=3 SV=1	0.001	4.026	9.40171	1	1	1	1	117	12.4	8.03	High		0.778	41	1
TRUE	High	Master Protein	O75643	U5 small nuclear ribonucleoprotein 200 kDa helicase OS=Homo sapiens GN=SNRNP200 PE=1 SV=2	0.001	3.986	0.468165	1	1	1	1	2136	244.4	6.06	High		0.018	59	1
TRUE	High	Master Protein	Q8ND56	Protein LSM14 homolog A OS=Homo sapiens GN=LSM14A PE=1 SV=3	0.001	3.96	3.88769	2	3	2	1	463	50.5	9.52	High		0.222	36	2
TRUE	High	Master Protein	P11532	Dystrophin OS=Homo sapiens GN=DMD PE=1 SV=3	0.001	3.949	0.814111	2	2	2	1	3685	426.5	5.88	High		0.02	33	2
TRUE	High	Master Protein	Q8TAT6	Nuclear protein localization protein 4 homolog OS=Homo sapiens GN=NPLOC4 PE=1 SV=3	0.001	3.939	1.64474	1	1	1	1	608	68.1	6.38	High		0.072	35	1
TRUE	High	Master Protein	P82650	28S ribosomal protein S22, mitochondrial OS=Homo sapiens GN=MRPS22 PE=1 SV=1	0.001	3.936	3.33333	1	1	1	1	360	41.3	7.9	High		0.096	48	1
TRUE	High	Master Protein	P07237	Protein disulfide-isomerase OS=Homo sapiens GN=P4HB PE=1 SV=3	0.001	3.935	4.92126	2	2	2	1	508	57.1	4.87	High		0.122	51	2
TRUE	High	Master Protein	Q9UHB9	Signal recognition particle subunit SRP68 OS=Homo sapiens GN=SRP68 PE=1 SV=2	0.001	3.927	2.87081	2	2	2	1	627	70.7	8.56	High		0.113	22	2
TRUE	High	Master Protein	Q02809	Procollagen-lysine,2-oxoglutarate 5-dioxygenase 1 OS=Homo sapiens GN=PLOD1 PE=1 SV=2	0.001	3.916	3.71389	2	2	2	1	727	83.5	6.95	High		0.101	59	2
TRUE	High	Master Protein	Q93052	Lipoma-preferred partner OS=Homo sapiens GN=LPP PE=1 SV=1	0.001	3.914	6.37255	2	2	2	1	612	65.7	7.37	High		0.194	23	2
TRUE	High	Master Protein	Q9P0J0	NADH dehydrogenase [ubiquinone] 1 alpha subcomplex subunit 13 OS=Homo sapiens GN=NDUFA13 PE=1 SV=3	0.001	3.907	6.94444	1	1	1	1	144	16.7	8.43	High		0.259	49	1
TRUE	High	Master Protein	P50570	Dynamin-2 OS=Homo sapiens GN=DNM2 PE=1 SV=2	0.001	3.906	2.41379	2	2	2	1	870	98	7.44	High		0.084	30	2
TRUE	High	Master Protein	Q14257	Reticulocalbin-2 OS=Homo sapiens GN=RCN2 PE=1 SV=1	0.001	3.905	6.30915	1	1	1	1	317	36.9	4.4	High		0.145	30	1
TRUE	High	Master Protein	Q14376	UDP-glucose 4-epimerase OS=Homo sapiens GN=GALE PE=1 SV=2	0.001	3.891	8.33333	2	2	2	1	348	38.3	6.73	High		0.259	31	2
TRUE	High	Master Protein	Q7Z7H8	39S ribosomal protein L10, mitochondrial OS=Homo sapiens GN=MRPL10 PE=1 SV=3	0.001	3.853	3.83142	1	1	1	1	261	29.3	9.58	High		0.194	28	1
TRUE	High	Master Protein	P55769	NHP2-like protein 1 OS=Homo sapiens GN=SNU13 PE=1 SV=3	0.001	3.837	9.375	1	1	1	1	128	14.2	8.46	High		0.292	47	1
TRUE	High	Master Protein	P21912	Succinate dehydrogenase [ubiquinone] iron-sulfur subunit, mitochondrial OS=Homo sapiens GN=SDHB PE=1 SV=3	0.001	3.782	5	1	1	1	1	280	31.6	8.76	High		0.11	42	1
TRUE	High	Master Protein	O43390	Heterogeneous nuclear ribonucleoprotein R OS=Homo sapiens GN=HNRNPR PE=1 SV=1	0.001	3.779	3.31754	2	2	1	1	633	70.9	8.13	High		0.119	35	2
TRUE	High	Master Protein	P49959	Double-strand break repair protein MRE11 OS=Homo sapiens GN=MRE11 PE=1 SV=3	0.001	3.762	1.41243	1	1	1	1	708	80.5	5.9	High		0.059	39	1
TRUE	High	Master Protein	O15533	Tapasin OS=Homo sapiens GN=TAPBP PE=1 SV=1	0.001	3.755	2.45536	1	1	1	1	448	47.6	7.15	High		0.145	38	1
TRUE	High	Master Protein	Q6Y7W6	GRB10-interacting GYF protein 2 OS=Homo sapiens GN=GIGYF2 PE=1 SV=1	0.001	3.752	0.846805	1	1	1	1	1299	150	5.54	High		0.038	22	1
TRUE	High	Master Protein	P46734	Dual specificity mitogen-activated protein kinase kinase 3 OS=Homo sapiens GN=MAP2K3 PE=1 SV=2	0.001	3.746	9.79827	3	4	2	1	347	39.3	7.43	High		0.334	30	3
TRUE	High	Master Protein	Q02750	Dual specificity mitogen-activated protein kinase kinase 1 OS=Homo sapiens GN=MAP2K1 PE=1 SV=2	0.001	3.705	8.6514	3	3	1	1	393	43.4	6.62	High		0.389	26	3
TRUE	High	Master Protein	P08559	Pyruvate dehydrogenase E1 component subunit alpha, somatic form, mitochondrial OS=Homo sapiens GN=PDHA1 PE=1 SV=3	0.001	3.68	4.61538	2	2	2	1	390	43.3	8.06	High		0.186	36	2
TRUE	High	Master Protein	A0A0A0MRZ8	Immunoglobulin kappa variable 3D-11 OS=Homo sapiens GN=IGKV3D-11 PE=3 SV=6	0.001	3.679	7.82609	1	4	1	1	115	12.6	5.29	High		0.468	104	1
TRUE	High	Master Protein	O00400	Acetyl-coenzyme A transporter 1 OS=Homo sapiens GN=SLC33A1 PE=1 SV=1	0.001	3.672	2.00364	1	1	1	1	549	60.9	7.33	High		0.083	48	1
TRUE	High	Master Protein	P26639	Threonine--tRNA ligase, cytoplasmic OS=Homo sapiens GN=TARS PE=1 SV=3	0.001	3.666	2.48963	2	2	2	1	723	83.4	6.67	High		0.101	33	2
TRUE	High	Master Protein	P0DME0	Protein SETSIP OS=Homo sapiens GN=SETSIP PE=1 SV=1	0.001	3.657	4.30464	1	2	1	1	302	34.9	4.31	High		0.425	27	1
TRUE	High	Master Protein	P62333	26S protease regulatory subunit 10B OS=Homo sapiens GN=PSMC6 PE=1 SV=1	0.001	3.636	7.19794	3	3	3	1	389	44.1	7.49	High		0.292	25	3
TRUE	High	Master Protein	P33316	Deoxyuridine 5'-triphosphate nucleotidohydrolase, mitochondrial OS=Homo sapiens GN=DUT PE=1 SV=4	0.001	3.626	3.96825	1	1	1	1	252	26.5	9.36	High		0.145	59	1
TRUE	High	Master Protein	Q92643	GPI-anchor transamidase OS=Homo sapiens GN=PIGK PE=1 SV=2	0.001	3.624	3.03797	1	1	1	1	395	45.2	6.16	High		0.096	43	1
TRUE	High	Master Protein	Q14789	Golgin subfamily B member 1 OS=Homo sapiens GN=GOLGB1 PE=1 SV=2	0.001	3.623	0.613685	1	1	1	1	3259	375.8	5	High		0.01	36	1
TRUE	High	Master Protein	Q8WX92	Negative elongation factor B OS=Homo sapiens GN=NELFB PE=1 SV=1	0.001	3.59	1.72414	1	1	1	1	580	65.7	6.13	High		0.068	49	1
TRUE	High	Master Protein	P22528	Cornifin-B OS=Homo sapiens GN=SPRR1B PE=1 SV=2	0.001	3.58	26.9663	2	2	2	1	89	9.9	8.48	High		0.778	40	2
TRUE	High	Master Protein	P62318	Small nuclear ribonucleoprotein Sm D3 OS=Homo sapiens GN=SNRPD3 PE=1 SV=1	0.001	3.575	16.6667	1	1	1	1	126	13.9	10.32	High		0.292	37	1
TRUE	High	Master Protein	Q15404	Ras suppressor protein 1 OS=Homo sapiens GN=RSU1 PE=1 SV=3	0.001	3.574	6.85921	2	2	2	1	277	31.5	8.65	High		0.311	27	2
TRUE	High	Master Protein	Q9H4A6	Golgi phosphoprotein 3 OS=Homo sapiens GN=GOLPH3 PE=1 SV=1	0.001	3.541	4.36242	1	1	1	1	298	33.8	6.44	High		0.136	44	1
TRUE	High	Master Protein	Q12802	A-kinase anchor protein 13 OS=Homo sapiens GN=AKAP13 PE=1 SV=2	0.001	3.529	0.746534	2	2	2	1	2813	307.4	5.24	High		0.032	31	2
TRUE	High	Master Protein	Q9Y295	Developmentally-regulated GTP-binding protein 1 OS=Homo sapiens GN=DRG1 PE=1 SV=1	0.001	3.525	9.80926	2	2	2	1	367	40.5	8.9	High		0.194	28	2
TRUE	High	Master Protein	P47914	60S ribosomal protein L29 OS=Homo sapiens GN=RPL29 PE=1 SV=2	0.001	3.516	14.4654	2	3	2	1	159	17.7	11.66	High		1.154	44	2
TRUE	High	Master Protein	Q9Y2R5	28S ribosomal protein S17, mitochondrial OS=Homo sapiens GN=MRPS17 PE=1 SV=1	0.001	3.515	22.3077	1	1	1	1	130	14.5	9.85	High		0.389	54	1
TRUE	High	Master Protein	Q9BQ48	39S ribosomal protein L34, mitochondrial OS=Homo sapiens GN=MRPL34 PE=1 SV=1	0.001	3.506	13.0435	1	1	1	1	92	10.2	12.25	High		0.585	33	1
TRUE	High	Master Protein	Q9NS69	Mitochondrial import receptor subunit TOM22 homolog OS=Homo sapiens GN=TOMM22 PE=1 SV=3	0.001	3.503	7.74648	1	1	1	1	142	15.5	4.34	High		0.389	35	1
TRUE	High	Master Protein	Q96T76	MMS19 nucleotide excision repair protein homolog OS=Homo sapiens GN=MMS19 PE=1 SV=2	0.001	3.489	2.62136	2	2	2	1	1030	113.2	6.35	High		0.081	39	2
TRUE	High	Master Protein	O75251	NADH dehydrogenase [ubiquinone] iron-sulfur protein 7, mitochondrial OS=Homo sapiens GN=NDUFS7 PE=1 SV=3	0.001	3.483	6.57277	1	1	1	1	213	23.5	9.99	High		0.179	35	1
TRUE	High	Master Protein	P24534	Elongation factor 1-beta OS=Homo sapiens GN=EEF1B2 PE=1 SV=3	0.001	3.48	10.6667	1	1	1	1	225	24.7	4.67	High		0.166	34	1
TRUE	High	Master Protein	Q13630	GDP-L-fucose synthase OS=Homo sapiens GN=TSTA3 PE=1 SV=1	0.001	3.477	5.60748	2	2	2	1	321	35.9	6.6	High		0.274	34	2
TRUE	High	Master Protein	Q7Z7K6	Centromere protein V OS=Homo sapiens GN=CENPV PE=1 SV=1	0.001	3.477	4.72727	1	1	1	1	275	29.9	9.73	High		0.155	38	1
TRUE	High	Master Protein	Q969Z0	Protein TBRG4 OS=Homo sapiens GN=TBRG4 PE=1 SV=1	0.001	3.475	1.58479	1	1	1	1	631	70.7	7.42	High		0.062	46	1
TRUE	High	Master Protein	Q6NUQ4	Transmembrane protein 214 OS=Homo sapiens GN=TMEM214 PE=1 SV=2	0.001	3.474	1.74165	1	1	1	1	689	77.1	9.14	High		0.061	26	1
TRUE	High	Master Protein	P14678	Small nuclear ribonucleoprotein-associated proteins B and B' OS=Homo sapiens GN=SNRPB PE=1 SV=2	0.001	3.469	3.33333	1	1	1	1	240	24.6	11.19	High		0.166	50	1
TRUE	High	Master Protein	O95831	Apoptosis-inducing factor 1, mitochondrial OS=Homo sapiens GN=AIFM1 PE=1 SV=1	0.001	3.452	1.79445	1	1	1	1	613	66.9	8.95	High		0.072	62	1
TRUE	High	Master Protein	P08195	4F2 cell-surface antigen heavy chain OS=Homo sapiens GN=SLC3A2 PE=1 SV=3	0.001	3.435	2.06349	1	1	1	1	630	68	5.01	High		0.072	25	1
TRUE	High	Master Protein	Q9BUL8	Programmed cell death protein 10 OS=Homo sapiens GN=PDCD10 PE=1 SV=1	0.001	3.435	8.49057	2	2	2	1	212	24.7	8.19	High		0.359	21	2
TRUE	High	Master Protein	Q6ZXV5	Transmembrane and TPR repeat-containing protein 3 OS=Homo sapiens GN=TMTC3 PE=1 SV=2	0.001	3.411	1.0929	1	1	1	1	915	103.9	8.87	High		0.042	51	1
TRUE	High	Master Protein	P82921	28S ribosomal protein S21, mitochondrial OS=Homo sapiens GN=MRPS21 PE=1 SV=2	0.001	3.41	13.7931	1	1	1	1	87	10.7	10.21	High		0.468	41	1
TRUE	High	Master Protein	P27482	Calmodulin-like protein 3 OS=Homo sapiens GN=CALML3 PE=1 SV=2	0.001	3.404	18.1208	2	3	1	1	149	16.9	4.42	High		0.52	38	2
TRUE	High	Master Protein	P11766	Alcohol dehydrogenase class-3 OS=Homo sapiens GN=ADH5 PE=1 SV=4	0.001	3.387	4.54545	2	2	2	1	374	39.7	7.49	High		0.245	35	2
TRUE	High	Master Protein	O14979	Heterogeneous nuclear ribonucleoprotein D-like OS=Homo sapiens GN=HNRNPDL PE=1 SV=3	0.001	3.372	2.38095	1	1	1	1	420	46.4	9.57	High		0.101	32	1
TRUE	High	Master Protein	Q9UMR2	ATP-dependent RNA helicase DDX19B OS=Homo sapiens GN=DDX19B PE=1 SV=1	0.001	3.371	3.34029	1	2	1	1	479	53.9	6.3	High		0.155	27	1
TRUE	High	Master Protein	P49591	Serine--tRNA ligase, cytoplasmic OS=Homo sapiens GN=SARS PE=1 SV=3	0.001	3.362	1.55642	1	1	1	1	514	58.7	6.43	High		0.077	43	1
TRUE	High	Master Protein	Q8WVK2	U4/U6.U5 small nuclear ribonucleoprotein 27 kDa protein OS=Homo sapiens GN=SNRNP27 PE=1 SV=1	0.001	3.358	7.09677	1	1	1	1	155	18.8	11.62	High		0.468	35	1
TRUE	High	Master Protein	P63313	Thymosin beta-10 OS=Homo sapiens GN=TMSB10 PE=1 SV=2	0.001	3.345	31.8182	1	1	1	1	44	5	5.36	High		0.778	33	1
TRUE	High	Master Protein	Q13228	Selenium-binding protein 1 OS=Homo sapiens GN=SELENBP1 PE=1 SV=2	0.001	3.341	3.81356	2	2	2	1	472	52.4	6.37	High		0.16	32	2
TRUE	High	Master Protein	O94874	E3 UFM1-protein ligase 1 OS=Homo sapiens GN=UFL1 PE=1 SV=2	0.001	3.333	2.267	2	2	2	1	794	89.5	6.79	High		0.093	27	2
TRUE	High	Master Protein	Q9H3P7	Golgi resident protein GCP60 OS=Homo sapiens GN=ACBD3 PE=1 SV=4	0.001	3.324	3.0303	1	1	1	1	528	60.6	5.06	High		0.105	46	1
TRUE	High	Master Protein	Q99829	Copine-1 OS=Homo sapiens GN=CPNE1 PE=1 SV=1	0.001	3.314	1.67598	1	1	1	1	537	59	5.83	High		0.101	50	1
TRUE	High	Master Protein	Q9H857	5'-nucleotidase domain-containing protein 2 OS=Homo sapiens GN=NT5DC2 PE=1 SV=1	0.001	3.298	3.46154	1	1	1	1	520	60.7	6.77	High		0.075	37	1
TRUE	High	Master Protein	Q9H936	Mitochondrial glutamate carrier 1 OS=Homo sapiens GN=SLC25A22 PE=1 SV=1	0.001	3.296	2.47678	1	1	1	1	323	34.4	9.29	High		0.136	59	1
TRUE	High	Master Protein	P62891	60S ribosomal protein L39 OS=Homo sapiens GN=RPL39 PE=1 SV=2	0.001	3.266	19.6078	1	3	1	1	51	6.4	12.56	High		99	44	1
TRUE	High	Master Protein	Q5BJH7	Protein YIF1B OS=Homo sapiens GN=YIF1B PE=1 SV=1	0.001	3.258	4.14013	1	1	1	1	314	34.4	9.16	High		0.212	45	1
TRUE	High	Master Protein	Q96I99	Succinate--CoA ligase [GDP-forming] subunit beta, mitochondrial OS=Homo sapiens GN=SUCLG2 PE=1 SV=2	0.001	3.252	4.86111	1	1	1	1	432	46.5	6.39	High		0.077	38	1
TRUE	High	Master Protein	P56385	ATP synthase subunit e, mitochondrial OS=Homo sapiens GN=ATP5I PE=1 SV=2	0.001	3.223	14.4928	1	1	1	1	69	7.9	9.35	High		0.585	48	1
TRUE	High	Master Protein	P00403	Cytochrome c oxidase subunit 2 OS=Homo sapiens GN=MT-CO2 PE=1 SV=1	0.001	3.217	4.40529	1	2	1	1	227	25.5	4.82	High		0.292	69	1
TRUE	High	Master Protein	P62330	ADP-ribosylation factor 6 OS=Homo sapiens GN=ARF6 PE=1 SV=2	0.001	3.166	6.28571	1	2	1	1	175	20.1	8.95	High		0.292	56	1
TRUE	High	Master Protein	P67812	Signal peptidase complex catalytic subunit SEC11A OS=Homo sapiens GN=SEC11A PE=1 SV=1	0.001	3.157	4.46927	1	1	1	1	179	20.6	9.48	High		0.212	57	1
TRUE	High	Master Protein	O75764	Transcription elongation factor A protein 3 OS=Homo sapiens GN=TCEA3 PE=1 SV=2	0.001	3.156	3.73563	1	1	1	1	348	38.9	9.19	High		0.11	26	1
TRUE	High	Master Protein	P10606	Cytochrome c oxidase subunit 5B, mitochondrial OS=Homo sapiens GN=COX5B PE=1 SV=2	0.001	3.154	9.30233	1	2	1	1	129	13.7	8.81	High		0.585	56	1
TRUE	High	Master Protein	Q9NWU5	39S ribosomal protein L22, mitochondrial OS=Homo sapiens GN=MRPL22 PE=1 SV=1	0.001	3.147	5.82524	1	1	1	1	206	23.6	9.94	High		0.166	24	1
TRUE	High	Master Protein	Q96DV4	39S ribosomal protein L38, mitochondrial OS=Homo sapiens GN=MRPL38 PE=1 SV=2	0.001	3.146	2.63158	1	1	1	1	380	44.6	7.53	High		0.105	31	1
TRUE	High	Master Protein	P51668	Ubiquitin-conjugating enzyme E2 D1 OS=Homo sapiens GN=UBE2D1 PE=1 SV=1	0.001	3.134	12.2449	1	1	1	1	147	16.6	7.42	High		0.585	48	1
TRUE	High	Master Protein	Q06323	Proteasome activator complex subunit 1 OS=Homo sapiens GN=PSME1 PE=1 SV=1	0.001	3.127	4.81928	1	1	1	1	249	28.7	6.02	High		0.129	24	1
TRUE	High	Master Protein	A0A075B6I9	Immunoglobulin lambda variable 7-46 OS=Homo sapiens GN=IGLV7-46 PE=3 SV=4	0.001	3.125	13.6752	2	3	2	1	117	12.5	7.2	High		2.162	53	2
TRUE	High	Master Protein	Q9HAV7	GrpE protein homolog 1, mitochondrial OS=Homo sapiens GN=GRPEL1 PE=1 SV=2	0.001	3.108	10.1382	2	2	2	1	217	24.3	8.12	High		0.292	33	2
TRUE	High	Master Protein	Q99848	Probable rRNA-processing protein EBP2 OS=Homo sapiens GN=EBNA1BP2 PE=1 SV=2	0.001	3.091	3.26797	1	1	1	1	306	34.8	10.1	High		0.136	36	1
TRUE	High	Master Protein	Q96IX5	Up-regulated during skeletal muscle growth protein 5 OS=Homo sapiens GN=USMG5 PE=1 SV=1	0.001	3.087	25.8621	1	2	1	1	58	6.5	9.76	High		1.154	41	1
TRUE	High	Master Protein	P22234	Multifunctional protein ADE2 OS=Homo sapiens GN=PAICS PE=1 SV=3	0.001	3.03	3.05882	1	1	1	1	425	47	7.23	High		0.086	30	1
TRUE	High	Master Protein	Q8TCT9	Minor histocompatibility antigen H13 OS=Homo sapiens GN=HM13 PE=1 SV=1	0.001	3.02	3.18302	1	1	1	1	377	41.5	6.43	High		0.155	33	1
TRUE	High	Master Protein	Q9NVS2	39S ribosomal protein S18a, mitochondrial OS=Homo sapiens GN=MRPS18A PE=1 SV=1	0.001	3.019	5.61224	1	1	1	1	196	22.2	10.33	High		0.166	33	1
TRUE	High	Master Protein	P40937	Replication factor C subunit 5 OS=Homo sapiens GN=RFC5 PE=1 SV=1	0.001	3.019	3.52941	1	1	1	1	340	38.5	7.2	High		0.083	26	1
TRUE	High	Master Protein	P60981	Destrin OS=Homo sapiens GN=DSTN PE=1 SV=3	0.001	2.982	8.48485	2	2	2	1	165	18.5	7.85	High		0.425	27	2
TRUE	High	Master Protein	P10398	Serine/threonine-protein kinase A-Raf OS=Homo sapiens GN=ARAF PE=1 SV=2	0.001	2.982	1.81518	1	1	1	1	606	67.5	9.01	High		0.061	39	1
TRUE	High	Master Protein	Q14643	Inositol 1,4,5-trisphosphate receptor type 1 OS=Homo sapiens GN=ITPR1 PE=1 SV=3	0.001	2.978	0.326323	1	1	1	1	2758	313.7	6.04	High		0.014	22	1
TRUE	High	Master Protein	O60678	Protein arginine N-methyltransferase 3 OS=Homo sapiens GN=PRMT3 PE=1 SV=3	0.001	2.97	1.88324	1	1	1	1	531	59.8	5.35	High		0.089	26	1
TRUE	High	Master Protein	P35250	Replication factor C subunit 2 OS=Homo sapiens GN=RFC2 PE=1 SV=3	0.001	2.962	3.67232	1	1	1	1	354	39.1	6.44	High		0.096	39	1
TRUE	High	Master Protein	Q96AE4	Far upstream element-binding protein 1 OS=Homo sapiens GN=FUBP1 PE=1 SV=3	0.001	2.954	1.39752	1	1	1	1	644	67.5	7.61	High		0.064	35	1
TRUE	High	Master Protein	O00217	NADH dehydrogenase [ubiquinone] iron-sulfur protein 8, mitochondrial OS=Homo sapiens GN=NDUFS8 PE=1 SV=1	0.001	2.952	4.28571	1	1	1	1	210	23.7	6.34	High		0.155	38	1
TRUE	High	Master Protein	Q2TB90	Putative hexokinase HKDC1 OS=Homo sapiens GN=HKDC1 PE=1 SV=3	0.001	2.921	1.09051	1	1	1	1	917	102.5	7.12	High		0.041	33	1
TRUE	High	Master Protein	O60869	Endothelial differentiation-related factor 1 OS=Homo sapiens GN=EDF1 PE=1 SV=1	0.001	2.917	10.1351	1	1	1	1	148	16.4	9.95	High		0.212	30	1
TRUE	High	Master Protein	P11172	Uridine 5'-monophosphate synthase OS=Homo sapiens GN=UMPS PE=1 SV=1	0.001	2.907	4.16667	1	1	1	1	480	52.2	7.24	High		0.083	21	1
TRUE	High	Master Protein	O75844	CAAX prenyl protease 1 homolog OS=Homo sapiens GN=ZMPSTE24 PE=1 SV=2	0.001	2.89	2.73684	2	2	2	1	475	54.8	7.49	High		0.222	23	2
TRUE	High	Master Protein	Q99956	Dual specificity protein phosphatase 9 OS=Homo sapiens GN=DUSP9 PE=1 SV=1	0.001	2.855	3.90625	1	1	1	1	384	41.8	6.11	High		0.105	34	1
TRUE	High	Master Protein	P16520	Guanine nucleotide-binding protein G(I)/G(S)/G(T) subunit beta-3 OS=Homo sapiens GN=GNB3 PE=1 SV=1	0.001	2.85	2.94118	1	1	1	1	340	37.2	5.67	High		0.145	28	1
TRUE	High	Master Protein	Q9BU23	Lipase maturation factor 2 OS=Homo sapiens GN=LMF2 PE=1 SV=2	0.001	2.848	1.13154	1	1	1	1	707	79.6	10.1	High		0.086	51	1
TRUE	High	Master Protein	Q66K14	TBC1 domain family member 9B OS=Homo sapiens GN=TBC1D9B PE=1 SV=3	0.001	2.821	1.44	2	2	2	1	1250	140.4	5.25	High		0.071	25	2
TRUE	High	Master Protein	Q9H3S7	Tyrosine-protein phosphatase non-receptor type 23 OS=Homo sapiens GN=PTPN23 PE=1 SV=1	0.001	2.819	0.672372	1	1	1	1	1636	178.9	6.92	High		0.029	24	1
TRUE	High	Master Protein	Q96TA2	ATP-dependent zinc metalloprotease YME1L1 OS=Homo sapiens GN=YME1L1 PE=1 SV=2	0.001	2.813	1.16429	1	1	1	1	773	86.4	8.76	High		0.046	38	1
TRUE	High	Master Protein	P61011	Signal recognition particle 54 kDa protein OS=Homo sapiens GN=SRP54 PE=1 SV=1	0.001	2.801	5.55556	1	1	1	1	504	55.7	8.75	High		0.064	31	1
TRUE	High	Master Protein	Q5F1R6	DnaJ homolog subfamily C member 21 OS=Homo sapiens GN=DNAJC21 PE=1 SV=2	0.001	2.794	3.20151	1	1	1	1	531	62	5.47	High		0.083	37	1
TRUE	High	Master Protein	Q9UNL2	Translocon-associated protein subunit gamma OS=Homo sapiens GN=SSR3 PE=1 SV=1	0.001	2.791	7.56757	1	2	1	1	185	21.1	9.61	High		0.389	21	1
TRUE	High	Master Protein	P56182	Ribosomal RNA processing protein 1 homolog A OS=Homo sapiens GN=RRP1 PE=1 SV=1	0.001	2.765	1.95228	1	1	1	1	461	52.8	9.33	High		0.089	35	1
TRUE	High	Master Protein	Q8N142	Adenylosuccinate synthetase isozyme 1 OS=Homo sapiens GN=ADSSL1 PE=1 SV=1	0.001	2.763	2.407	1	1	1	1	457	50.2	8.59	High		0.083	45	1
TRUE	High	Master Protein	P56556	NADH dehydrogenase [ubiquinone] 1 alpha subcomplex subunit 6 OS=Homo sapiens GN=NDUFA6 PE=1 SV=3	0.001	2.761	5.19481	1	1	1	1	154	17.9	10.14	High		0.259	35	1
TRUE	High	Master Protein	Q9H9T3	Elongator complex protein 3 OS=Homo sapiens GN=ELP3 PE=1 SV=2	0.001	2.754	4.20475	2	2	2	1	547	62.2	8.88	High	Phospho [S161(100)]	0.145	36	2
TRUE	High	Master Protein	Q9H223	EH domain-containing protein 4 OS=Homo sapiens GN=EHD4 PE=1 SV=1	0.001	2.746	1.47874	1	1	1	1	541	61.1	6.76	High		0.07	42	1
TRUE	High	Master Protein	Q6UXV4	MICOS complex subunit MIC27 OS=Homo sapiens GN=APOOL PE=1 SV=1	0.001	2.734	4.47761	1	1	1	1	268	29.1	9.52	High		0.155	33	1
TRUE	High	Master Protein	Q5VV42	Threonylcarbamoyladenosine tRNA methylthiotransferase OS=Homo sapiens GN=CDKAL1 PE=1 SV=1	0.001	2.732	2.24525	1	1	1	1	579	65.1	7.46	High		0.068	34	1
TRUE	High	Master Protein	Q96KP4	Cytosolic non-specific dipeptidase OS=Homo sapiens GN=CNDP2 PE=1 SV=2	0.001	2.728	2.31579	1	1	1	1	475	52.8	5.97	High		0.083	32	1
TRUE	High	Master Protein	Q9BX40	Protein LSM14 homolog B OS=Homo sapiens GN=LSM14B PE=1 SV=1	0.001	2.728	2.85714	1	1	1	1	385	42	9.69	High		0.122	33	1
TRUE	High	Master Protein	Q14203	Dynactin subunit 1 OS=Homo sapiens GN=DCTN1 PE=1 SV=3	0.001	2.7	0.938967	1	1	1	1	1278	141.6	5.81	High		0.032	37	1
TRUE	High	Master Protein	P40925	Malate dehydrogenase, cytoplasmic OS=Homo sapiens GN=MDH1 PE=1 SV=4	0.001	2.676	5.08982	1	1	1	1	334	36.4	7.36	High		0.101	26	1
TRUE	High	Master Protein	Q14919	Dr1-associated corepressor OS=Homo sapiens GN=DRAP1 PE=1 SV=3	0.001	2.671	5.85366	1	1	1	1	205	22.3	5.17	High		0.292	33	1
TRUE	High	Master Protein	P00846	ATP synthase subunit a OS=Homo sapiens GN=MT-ATP6 PE=1 SV=1	0.001	2.658	4.42478	1	1	1	1	226	24.8	10.1	High		0.585	34	1
TRUE	High	Master Protein	Q9NWB6	Arginine and glutamate-rich protein 1 OS=Homo sapiens GN=ARGLU1 PE=1 SV=1	0.001	2.644	6.22711	2	2	2	1	273	33.2	10.35	High		0.359	34	2
TRUE	High	Master Protein	Q96AY3	Peptidyl-prolyl cis-trans isomerase FKBP10 OS=Homo sapiens GN=FKBP10 PE=1 SV=1	0.001	2.635	1.54639	1	1	1	1	582	64.2	5.62	High		0.064	29	1
TRUE	High	Master Protein	Q15054	DNA polymerase delta subunit 3 OS=Homo sapiens GN=POLD3 PE=1 SV=2	0.001	2.633	3.21888	1	1	1	1	466	51.4	9.35	High		0.086	23	1
TRUE	High	Master Protein	O76071	Probable cytosolic iron-sulfur protein assembly protein CIAO1 OS=Homo sapiens GN=CIAO1 PE=1 SV=1	0.001	2.633	2.65487	1	1	1	1	339	37.8	4.97	High		0.136	32	1
TRUE	High	Master Protein	Q16401	26S proteasome non-ATPase regulatory subunit 5 OS=Homo sapiens GN=PSMD5 PE=1 SV=3	0.001	2.625	2.97619	1	1	1	1	504	56.2	5.48	High		0.075	28	1
TRUE	High	Master Protein	P06703	Protein S100-A6 OS=Homo sapiens GN=S100A6 PE=1 SV=1	0.001	2.622	8.88889	1	1	1	1	90	10.2	5.48	High		0.585	47	1
TRUE	High	Master Protein	Q96D53	Atypical kinase COQ8B, mitochondrial OS=Homo sapiens GN=COQ8B PE=1 SV=2	0.001	2.6	1.65441	1	1	1	1	544	60	7.23	High		0.064	33	1
TRUE	High	Master Protein	Q9UHQ9	NADH-cytochrome b5 reductase 1 OS=Homo sapiens GN=CYB5R1 PE=1 SV=1	0.001	2.583	2.95082	1	1	1	1	305	34.1	9.38	High		0.122	25	1
TRUE	High	Master Protein	O75352	Mannose-P-dolichol utilization defect 1 protein OS=Homo sapiens GN=MPDU1 PE=1 SV=2	0.001	2.562	4.04858	1	1	1	1	247	26.6	8.94	High		0.334	38	1
TRUE	High	Master Protein	Q9UID3	Vacuolar protein sorting-associated protein 51 homolog OS=Homo sapiens GN=VPS51 PE=1 SV=2	0.001	2.535	1.53453	1	1	1	1	782	86	6.47	High		0.055	46	1
TRUE	High	Master Protein	P29084	Transcription initiation factor IIE subunit beta OS=Homo sapiens GN=GTF2E2 PE=1 SV=1	0.001	2.507	2.74914	1	1	1	1	291	33	9.66	High		0.101	25	1
TRUE	High	Master Protein	O14545	TRAF-type zinc finger domain-containing protein 1 OS=Homo sapiens GN=TRAFD1 PE=1 SV=1	0.001	2.505	2.23368	1	1	1	1	582	64.8	5.29	High		0.083	33	1
TRUE	High	Master Protein	Q9NZM1	Myoferlin OS=Homo sapiens GN=MYOF PE=1 SV=1	0.001	2.489	0.533721	1	1	1	1	2061	234.6	6.18	High		0.017	37	1
TRUE	High	Master Protein	Q9Y679	Ancient ubiquitous protein 1 OS=Homo sapiens GN=AUP1 PE=1 SV=1	0.001	2.487	2.73109	1	1	1	1	476	53	8.09	High		0.096	36	1
TRUE	High	Master Protein	P51572	B-cell receptor-associated protein 31 OS=Homo sapiens GN=BCAP31 PE=1 SV=3	0.001	2.485	3.65854	1	1	1	1	246	28	8.44	High		0.155	22	1
TRUE	High	Master Protein	O76003	Glutaredoxin-3 OS=Homo sapiens GN=GLRX3 PE=1 SV=2	0.001	2.484	5.07463	1	1	1	1	335	37.4	5.39	High		0.129	33	1
TRUE	High	Master Protein	Q9UI10	Translation initiation factor eIF-2B subunit delta OS=Homo sapiens GN=EIF2B4 PE=1 SV=2	0.001	2.468	2.67686	1	1	1	1	523	57.5	9.38	High		0.089	42	1
TRUE	High	Master Protein	P51114	Fragile X mental retardation syndrome-related protein 1 OS=Homo sapiens GN=FXR1 PE=1 SV=3	0.001	2.466	2.89855	1	1	1	1	621	69.7	6.15	High		0.061	39	1
TRUE	High	Master Protein	Q14739	Lamin-B receptor OS=Homo sapiens GN=LBR PE=1 SV=2	0.001	2.465	3.08943	2	2	2	1	615	70.7	9.36	High		0.179	28	2
TRUE	High	Master Protein	Q6GMV3	Putative peptidyl-tRNA hydrolase PTRHD1 OS=Homo sapiens GN=PTRHD1 PE=1 SV=1	0.001	2.435	6.42857	1	1	1	1	140	15.8	9.1	High		0.334	28	1
TRUE	High	Master Protein	Q8WX93	Palladin OS=Homo sapiens GN=PALLD PE=1 SV=3	0.001	2.429	0.795372	1	1	1	1	1383	150.5	7.09	High		0.031	34	1
TRUE	High	Master Protein	Q96IU4	Protein ABHD14B OS=Homo sapiens GN=ABHD14B PE=1 SV=1	0.001	2.418	8.09524	2	2	2	1	210	22.3	6.4	High		0.52	32	2
TRUE	High	Master Protein	Q6PI48	Aspartate--tRNA ligase, mitochondrial OS=Homo sapiens GN=DARS2 PE=1 SV=1	0.001	2.4	1.39535	1	1	1	1	645	73.5	8.02	High		0.055	28	1
TRUE	High	Master Protein	O75027	ATP-binding cassette sub-family B member 7, mitochondrial OS=Homo sapiens GN=ABCB7 PE=1 SV=2	0.001	2.393	1.32979	1	1	1	1	752	82.6	9.33	High		0.056	29	1
TRUE	High	Master Protein	P02788	Lactotransferrin OS=Homo sapiens GN=LTF PE=1 SV=6	0.001	2.388	1.26761	1	1	1	1	710	78.1	8.12	High		0.049	34	1
TRUE	High	Master Protein	P17612	cAMP-dependent protein kinase catalytic subunit alpha OS=Homo sapiens GN=PRKACA PE=1 SV=2	0.002	2.353	2.849	1	1	1	1	351	40.6	8.79	High		0.116	42	1
TRUE	High	Master Protein	Q8N5K1	CDGSH iron-sulfur domain-containing protein 2 OS=Homo sapiens GN=CISD2 PE=1 SV=1	0.002	2.348	14.8148	2	2	2	1	135	15.3	9.61	High		0.668	20	2
TRUE	High	Master Protein	Q5JTV8	Torsin-1A-interacting protein 1 OS=Homo sapiens GN=TOR1AIP1 PE=1 SV=2	0.002	2.319	2.22985	1	1	1	1	583	66.2	8.18	High		0.068	39	1
TRUE	High	Master Protein	Q9BVP2	Guanine nucleotide-binding protein-like 3 OS=Homo sapiens GN=GNL3 PE=1 SV=2	0.002	2.298	3.09654	1	1	1	1	549	62	9.16	High		0.075	21	1
TRUE	High	Master Protein	Q9UBM7	7-dehydrocholesterol reductase OS=Homo sapiens GN=DHCR7 PE=1 SV=1	0.002	2.265	1.68421	1	1	1	1	475	54.5	8.7	High		0.136	35	1
TRUE	High	Master Protein	Q9H6F5	Coiled-coil domain-containing protein 86 OS=Homo sapiens GN=CCDC86 PE=1 SV=1	0.002	2.258	3.05556	1	1	1	1	360	40.2	10.33	High		0.116	33	1
TRUE	High	Master Protein	Q13617	Cullin-2 OS=Homo sapiens GN=CUL2 PE=1 SV=2	0.003	2.244	1.47651	1	1	1	1	745	86.9	6.92	High		0.047	29	1
TRUE	High	Master Protein	Q9BW92	Threonine--tRNA ligase, mitochondrial OS=Homo sapiens GN=TARS2 PE=1 SV=1	0.003	2.236	1.67131	1	1	1	1	718	81	7.3	High		0.051	35	1
TRUE	High	Master Protein	P12268	Inosine-5'-monophosphate dehydrogenase 2 OS=Homo sapiens GN=IMPDH2 PE=1 SV=2	0.003	2.222	1.55642	1	1	1	1	514	55.8	6.9	High		0.089	25	1
TRUE	High	Master Protein	Q5BJF2	Transmembrane protein 97 OS=Homo sapiens GN=TMEM97 PE=1 SV=1	0.003	2.209	4.54545	1	1	1	1	176	20.8	9.38	High		0.334	44	1
TRUE	High	Master Protein	Q15233	Non-POU domain-containing octamer-binding protein OS=Homo sapiens GN=NONO PE=1 SV=4	0.003	2.201	2.76008	1	1	1	1	471	54.2	8.95	High		0.086	36	1
TRUE	High	Master Protein	O00330	Pyruvate dehydrogenase protein X component, mitochondrial OS=Homo sapiens GN=PDHX PE=1 SV=3	0.004	2.135	1.79641	1	1	1	1	501	54.1	8.66	High		0.083	34	1
TRUE	High	Master Protein	Q15758	Neutral amino acid transporter B(0) OS=Homo sapiens GN=SLC1A5 PE=1 SV=2	0.004	2.13	1.84843	1	1	1	1	541	56.6	5.48	High		0.11	26	1
TRUE	High	Master Protein	P53396	ATP-citrate synthase OS=Homo sapiens GN=ACLY PE=1 SV=3	0.004	2.127	0.817439	1	1	1	1	1101	120.8	7.33	High		0.035	23	1
TRUE	High	Master Protein	P17931	Galectin-3 OS=Homo sapiens GN=LGALS3 PE=1 SV=5	0.004	2.123	6	1	1	1	1	250	26.1	8.56	High		0.233	28	1
TRUE	High	Master Protein	O96000	NADH dehydrogenase [ubiquinone] 1 beta subcomplex subunit 10 OS=Homo sapiens GN=NDUFB10 PE=1 SV=3	0.004	2.121	6.39535	1	1	1	1	172	20.8	8.48	High		0.212	28	1
TRUE	High	Master Protein	O95081	Arf-GAP domain and FG repeat-containing protein 2 OS=Homo sapiens GN=AGFG2 PE=1 SV=2	0.004	2.121	2.2869	1	1	1	1	481	48.9	9.11	High		0.136	24	1
TRUE	High	Master Protein	Q15386	Ubiquitin-protein ligase E3C OS=Homo sapiens GN=UBE3C PE=1 SV=3	0.004	2.11	1.93906	1	1	1	1	1083	123.8	6.71	High		0.037	25	1
TRUE	High	Master Protein	Q14683	Structural maintenance of chromosomes protein 1A OS=Homo sapiens GN=SMC1A PE=1 SV=2	0.004	2.107	0.729927	1	1	1	1	1233	143.1	7.64	High		0.027	34	1
TRUE	High	Master Protein	P37268	Squalene synthase OS=Homo sapiens GN=FDFT1 PE=1 SV=1	0.004	2.106	1.67866	1	1	1	1	417	48.1	6.54	High		0.101	35	1
TRUE	High	Master Protein	Q96A33	Coiled-coil domain-containing protein 47 OS=Homo sapiens GN=CCDC47 PE=1 SV=1	0.004	2.099	2.07039	1	1	1	1	483	55.8	4.87	High		0.105	40	1
TRUE	High	Master Protein	Q8N8S7	Protein enabled homolog OS=Homo sapiens GN=ENAH PE=1 SV=2	0.004	2.091	1.86125	1	1	1	1	591	66.5	6.93	High		0.096	51	1
TRUE	High	Master Protein	Q9NRX2	39S ribosomal protein L17, mitochondrial OS=Homo sapiens GN=MRPL17 PE=1 SV=1	0.004	2.087	4.57143	1	1	1	1	175	20	10.11	High		0.179	31	1
TRUE	High	Master Protein	P62942	Peptidyl-prolyl cis-trans isomerase FKBP1A OS=Homo sapiens GN=FKBP1A PE=1 SV=2	0.005	2.084	12.037	1	1	1	1	108	11.9	8.16	High		0.778	21	1
TRUE	High	Master Protein	Q6UX53	Methyltransferase-like protein 7B OS=Homo sapiens GN=METTL7B PE=1 SV=2	0.005	2.073	4.09836	1	1	1	1	244	27.8	8.38	High		0.155	54	1
TRUE	High	Master Protein	Q9UGP8	Translocation protein SEC63 homolog OS=Homo sapiens GN=SEC63 PE=1 SV=2	0.005	2.002	1.18421	1	1	1	1	760	87.9	5.31	High		0.056	22	1
TRUE	High	Master Protein	Q9HBL8	NmrA-like family domain-containing protein 1 OS=Homo sapiens GN=NMRAL1 PE=1 SV=1	0.005	1.98	5.68562	1	1	1	1	299	33.3	7.52	High		0.122	26	1
TRUE	High	Master Protein	P23284	Peptidyl-prolyl cis-trans isomerase B OS=Homo sapiens GN=PPIB PE=1 SV=2	0.005	1.977	3.7037	1	1	1	1	216	23.7	9.41	High		0.155	27	1
TRUE	High	Master Protein	Q9H299	SH3 domain-binding glutamic acid-rich-like protein 3 OS=Homo sapiens GN=SH3BGRL3 PE=1 SV=1	0.005	1.969	10.7527	1	1	1	1	93	10.4	4.93	High		0.585	33	1
TRUE	High	Master Protein	Q13895	Bystin OS=Homo sapiens GN=BYSL PE=1 SV=3	0.005	1.945	4.57666	1	1	1	1	437	49.6	8.12	High		0.083	27	1
TRUE	High	Master Protein	P61163	Alpha-centractin OS=Homo sapiens GN=ACTR1A PE=1 SV=1	0.005	1.938	4.25532	1	1	1	1	376	42.6	6.64	High		0.105	25	1
TRUE	High	Master Protein	Q63HN8	E3 ubiquitin-protein ligase RNF213 OS=Homo sapiens GN=RNF213 PE=1 SV=3	0.005	1.924	0.211254	1	1	1	1	5207	591	6.48	High		0.007	34	1
TRUE	High	Master Protein	P82930	28S ribosomal protein S34, mitochondrial OS=Homo sapiens GN=MRPS34 PE=1 SV=2	0.005	1.923	3.21101	1	1	1	1	218	25.6	9.98	High		0.166	45	1
TRUE	High	Master Protein	Q9UJX3	Anaphase-promoting complex subunit 7 OS=Homo sapiens GN=ANAPC7 PE=1 SV=4	0.005	1.918	2.00334	1	1	1	1	599	66.8	5.64	High		0.07	29	1
TRUE	High	Master Protein	Q9Y446	Plakophilin-3 OS=Homo sapiens GN=PKP3 PE=1 SV=1	0.006	1.906	1.25471	1	1	1	1	797	87	9.32	High		0.045	22	1
TRUE	High	Master Protein	P49642	DNA primase small subunit OS=Homo sapiens GN=PRIM1 PE=1 SV=1	0.006	1.897	2.14286	1	1	1	1	420	49.9	8.21	High		0.068	36	1
TRUE	High	Master Protein	O15372	Eukaryotic translation initiation factor 3 subunit H OS=Homo sapiens GN=EIF3H PE=1 SV=1	0.006	1.883	5.39773	1	1	1	1	352	39.9	6.54	High		0.101	50	1
TRUE	High	Master Protein	Q9BRX2	Protein pelota homolog OS=Homo sapiens GN=PELO PE=1 SV=2	0.006	1.879	3.8961	1	1	1	1	385	43.3	6.34	High		0.089	36	1
TRUE	High	Master Protein	Q13643	Four and a half LIM domains protein 3 OS=Homo sapiens GN=FHL3 PE=1 SV=4	0.006	1.869	3.57143	1	1	1	1	280	31.2	6.2	High		0.145	30	1
TRUE	High	Master Protein	Q8N3D4	EH domain-binding protein 1-like protein 1 OS=Homo sapiens GN=EHBP1L1 PE=1 SV=2	0.006	1.863	1.18188	1	1	1	1	1523	161.8	4.83	High		0.029	27	1
TRUE	High	Master Protein	Q9UDY2	Tight junction protein ZO-2 OS=Homo sapiens GN=TJP2 PE=1 SV=2	0.006	1.858	1.0084	1	1	1	1	1190	133.9	7.4	High		0.028	25	1
TRUE	High	Master Protein	Q3LXA3	Triokinase/FMN cyclase OS=Homo sapiens GN=TKFC PE=1 SV=2	0.006	1.84	3.82609	1	1	1	1	575	58.9	7.49	High		0.072	25	1
TRUE	High	Master Protein	O00231	26S proteasome non-ATPase regulatory subunit 11 OS=Homo sapiens GN=PSMD11 PE=1 SV=3	0.006	1.824	2.8436	1	1	1	1	422	47.4	6.48	High		0.075	30	1
TRUE	High	Master Protein	P43243	Matrin-3 OS=Homo sapiens GN=MATR3 PE=1 SV=2	0.006	1.812	1.06257	1	1	1	1	847	94.6	6.25	High		0.048	27	1
TRUE	High	Master Protein	P15559	NAD(P)H dehydrogenase [quinone] 1 OS=Homo sapiens GN=NQO1 PE=1 SV=1	0.006	1.805	4.74453	1	1	1	1	274	30.8	8.88	High		0.194	22	1
TRUE	High	Master Protein	O14828	Secretory carrier-associated membrane protein 3 OS=Homo sapiens GN=SCAMP3 PE=1 SV=3	0.008	1.788	3.7464	1	1	1	1	347	38.3	7.64	High		0.166	40	1
TRUE	High	Master Protein	Q9NS37	CREB/ATF bZIP transcription factor OS=Homo sapiens GN=CREBZF PE=1 SV=2	0.009	1.754	1.9774	1	1	1	1	354	37.1	5.24	High		0.11	36	1
TRUE	High	Master Protein	Q16600	Zinc finger protein 239 OS=Homo sapiens GN=ZNF239 PE=1 SV=3	0.009	1.744	1.96507	1	1	1	1	458	51.6	7.64	High		0.07	36	1
TRUE	High	Master Protein	O14975	Very long-chain acyl-CoA synthetase OS=Homo sapiens GN=SLC27A2 PE=1 SV=2	0.009	1.743	4.35484	1	1	1	1	620	70.3	8.51	High		0.062	31	1
TRUE	High	Master Protein	O00442	RNA 3'-terminal phosphate cyclase OS=Homo sapiens GN=RTCA PE=1 SV=1	0.009	1.734	4.37158	1	1	1	1	366	39.3	7.85	High		0.122	34	1
TRUE	High	Master Protein	Q9H8Y5	Ankyrin repeat and zinc finger domain-containing protein 1 OS=Homo sapiens GN=ANKZF1 PE=1 SV=1	0.009	1.71	1.65289	1	1	1	1	726	80.9	8.41	High		0.055	28	1
TRUE	High	Master Protein	O95140	Mitofusin-2 OS=Homo sapiens GN=MFN2 PE=1 SV=3	0.01	1.691	1.0568	1	1	1	1	757	86.3	6.98	High		0.053	30	1
TRUE	High	Master Protein	Q96KP1	Exocyst complex component 2 OS=Homo sapiens GN=EXOC2 PE=1 SV=1	0.01	1.682	2.05628	1	1	1	1	924	104	6.9	High		0.044	21	1
TRUE	High	Master Protein	Q9Y263	Phospholipase A-2-activating protein OS=Homo sapiens GN=PLAA PE=1 SV=2	0.01	1.678	1.50943	1	1	1	1	795	87.1	6.37	High		0.046	28	1
TRUE	High	Master Protein	Q8WU90	Zinc finger CCCH domain-containing protein 15 OS=Homo sapiens GN=ZC3H15 PE=1 SV=1	0.01	1.677	1.87793	1	1	1	1	426	48.6	5.31	High		0.08	22	1
TRUE	High	Master Protein	Q14134	Tripartite motif-containing protein 29 OS=Homo sapiens GN=TRIM29 PE=1 SV=2	0.01	1.634	1.36054	1	1	1	1	588	65.8	7.15	High		0.059	27	1
TRUE	High	Master Protein	Q6NXE6	Armadillo repeat-containing protein 6 OS=Homo sapiens GN=ARMC6 PE=1 SV=2	0.01	1.618	1.39721	1	1	1	1	501	54.1	6.24	High		0.089	26	1
